# Supplementary material for: An ER phospholipid hydrolase drives ER-associated mitochondrial constriction for fission and fusion
Source: eLife. 2022 Nov 30;11:e84279. doi: 10.7554/eLife.84279 (PMC9725753; doi:10.7554/eLife.84279)
Supplement: Figure 1—source data 4. [file elife-84279-fig1-data4.xlsx]

## Sheet: Figure 1G
Protein IDs	Protein names	Gene names	Fasta headers	Potential contaminant	LFQ intensity 20kp_1	LFQ intensity 20kp_1_R1	LFQ intensity 20kp_2	LFQ intensity 20kp_2_R1	avg E209A wt after contaminants sorted OUT	avg Mfn1 E209A after contaminants sorted OUT	rank	Localization
CON__A2I7N0				+	0	0	0	0	0	0		nucleus
CON__A2I7N3;CON__REFSEQ:XP_001252647			;	+	0	0	0	0	0	0		mitochondria?
CON__ENSEMBL:ENSBTAP00000024146				+	24934000	22865000	22639000	0	23899500	11319500		nucleus
CON__P00761				+	40625000000	37634000000	43417000000	41069000000	39129500000	42243000000		cytoplasm
P02533;CON__P02533;CON__P19012;P19012;CON__A2A4G1;CON__Q3ZAW8;CON__Q9Z2K1;CON__Q99456;CON__Q7Z3Y9;CON__Q14532;CON__Q61782;CON__O76015;CON__O76013;CON__A2AB72;Q7Z3Y9;O76015;Q99456;O76013	Keratin, type I cytoskeletal 14	KRT14	Keratin, type I cytoskeletal 14 OS=Homo sapiens OX=9606 GN=KRT14 PE=1 SV=4;	+	0	0	0	0	0	0		ER, ER shaping
CON__P02662				+	0	0	0	0	0	0		cytoplasm
CON__P02666				+	0	0	0	0	0	0		plasma membrane?
CON__P02768-1;P02768	Serum albumin	ALB	;Serum albumin OS=Homo sapiens OX=9606 GN=ALB PE=1 SV=2	+	4430200	0	0	0	2215100	0		endomembrane/ER
CON__P02769				+	28397000	15866000	68381000	81385000	22131500	74883000		cytoplasm/nucleus
CON__P05787;P05787;CON__H-INV:HIT000292931;CON__Q9H552;CON__H-INV:HIT000016045;CON__Q9NSB2;CON__Q6ISB0;Q9NSB2;CON__REFSEQ:XP_092267;P14136;CON__Q6KB66-1;Q6KB66	Keratin, type II cytoskeletal 8	KRT8	;Keratin, type II cytoskeletal 8 OS=Homo sapiens OX=9606 GN=KRT8 PE=1 SV=7	+	7651200000	7823100000	3661600000	3902800000	7737150000	3782200000		mitochondrial inner membrane
CON__P07477;Q8NHM4;P07478;P07477	Putative trypsin-6;Trypsin-2;Trypsin-1;Alpha-trypsin chain 1;Alpha-trypsin chain 2	PRSS3P2;PRSS2;PRSS1	;Putative trypsin-6 OS=Homo sapiens OX=9606 GN=PRSS3P2 PE=5 SV=2;Trypsin-2 OS=Homo sapiens OX=9606 GN=PRSS2 PE=1 SV=1;Trypsin-1 OS=Homo sapiens OX=9606 GN=PRSS1 PE=1 SV=1	+	126180000	173070000	146530000	128770000	149625000	137650000		cytoplasm/cytoskeleton
CON__P08729;CON__Q9DCV7;CON__P19013;P19013				+	190610000	0	0	0	95305000	0		plasma membrane or mitochondria?
CON__P08779;P08779	Keratin, type I cytoskeletal 16	KRT16	;Keratin, type I cytoskeletal 16 OS=Homo sapiens OX=9606 GN=KRT16 PE=1 SV=4	+	0	0	0	0	0	0		cytoplasm
CON__P13645;P13645;CON__P02535-1;CON__P08730-1;CON__Q148H6;CON__Q7Z3Y7;Q7Z3Y7;CON__Q7Z3Z0;CON__Q7Z3Y8;CON__Q2M2I5;Q7Z3Z0;Q7Z3Y8;Q2M2I5	Keratin, type I cytoskeletal 10	KRT10	;Keratin, type I cytoskeletal 10 OS=Homo sapiens OX=9606 GN=KRT10 PE=1 SV=6	+	2989300000	3026700000	4615800000	5069400000	3008000000	4842600000		nucleus?
CON__P13647;P13647	Keratin, type II cytoskeletal 5	KRT5	;Keratin, type II cytoskeletal 5 OS=Homo sapiens OX=9606 GN=KRT5 PE=1 SV=3	+	0	36425000	86043000	110680000	18212500	98361500		cytoplasm
CON__P19001				+	0	0	0	0	0	0		golgi
CON__P34955				+	0	0	0	0	0	0		nucleus/cytoplasm
CON__P35527;P35527	Keratin, type I cytoskeletal 9	KRT9	;Keratin, type I cytoskeletal 9 OS=Homo sapiens OX=9606 GN=KRT9 PE=1 SV=3	+	1179800000	1154000000	1311600000	1383000000	1166900000	1347300000		mitochondrial inner membrane
CON__P35908v2;P35908;CON__P35908	Keratin, type II cytoskeletal 2 epidermal	KRT2	;Keratin, type II cytoskeletal 2 epidermal OS=Homo sapiens OX=9606 GN=KRT2 PE=1 SV=2;	+	1855100000	1868700000	3167600000	3272200000	1861900000	3219900000		ER/mito
CON__P41361;P01008				+	0	0	0	0	0	0		cytoplasm?
CON__P78386;P78386	Keratin, type II cuticular Hb5	KRT85	;Keratin, type II cuticular Hb5 OS=Homo sapiens OX=9606 GN=KRT85 PE=1 SV=1	+	0	0	0	0	0	0		nucleus
CON__Q04695;Q04695;CON__Q9QWL7;CON__Q9C075;Q9C075	Keratin, type I cytoskeletal 17	KRT17	;Keratin, type I cytoskeletal 17 OS=Homo sapiens OX=9606 GN=KRT17 PE=1 SV=2;	+	505360000	455060000	62329000	144000000	480210000	103164500		cytoskeleton
CON__Q9UE12;CON__Q15323;Q15323;Q14525;CON__Q14525;O76014;CON__A2A5Y0;CON__O76014;CON__O76009;CON__Q6NTB9;CON__REFSEQ:XP_986630;O76009;Q14532;O76011;CON__O76011;CON__Q8IUT8;CON__Q9D646	Keratin, type I cuticular Ha1;Keratin, type I cuticular Ha3-II;Keratin, type I cuticular Ha7;Keratin, type I cuticular Ha3-I;Keratin, type I cuticular Ha2	KRT31;KRT33B;KRT37;KRT33A;KRT32	;;Keratin, type I cuticular Ha1 OS=Homo sapiens OX=9606 GN=KRT31 PE=1 SV=3;Keratin, type I cuticular Ha3-II OS=Homo sapiens OX=9606 GN=KRT33B PE=1 SV=3;;Keratin, type I cuticular Ha7 OS=Homo sapiens OX=9606 GN=KRT37 PE=3 SV=3;;;;;;Keratin, type I cuticular	+	0	0	76233000	0	0	38116500		plasma membrane
CON__Q6IME9;CON__Q14CN4-1;Q14CN4	Keratin, type II cytoskeletal 72	KRT72	;;Keratin, type II cytoskeletal 72 OS=Homo sapiens OX=9606 GN=KRT72 PE=1 SV=2	+	0	0	0	14379000	0	7189500		mitochondria
CON__Q3KNV1;P08729	Keratin, type II cytoskeletal 7	KRT7	;Keratin, type II cytoskeletal 7 OS=Homo sapiens OX=9606 GN=KRT7 PE=1 SV=5	+	3957200000	4118100000	1903500000	2185200000	4037650000	2044350000		lysosome/endosome
CON__Q3TTY5				+	0	0	0	0	0	0		ER membrane
CON__Q5D862;Q5D862	Filaggrin-2	FLG2	;Filaggrin-2 OS=Homo sapiens OX=9606 GN=FLG2 PE=1 SV=1	+	0	0	0	0	0	0		mitochondria
CON__Q5XKE5;Q5XKE5	Keratin, type II cytoskeletal 79	KRT79	;Keratin, type II cytoskeletal 79 OS=Homo sapiens OX=9606 GN=KRT79 PE=1 SV=2	+	412140000	0	0	0	206070000	0		cytoplasm?
CON__Q6IFZ6;CON__Q7Z794;Q7Z794	Keratin, type II cytoskeletal 1b	KRT77	;;Keratin, type II cytoskeletal 1b OS=Homo sapiens OX=9606 GN=KRT77 PE=2 SV=3	+	0	0	0	0	0	0		mitochondrial inner membrane
CON__Q7RTT2;CON__Q8N1N4-2;Q8N1N4	Keratin, type II cytoskeletal 78	KRT78	;;Keratin, type II cytoskeletal 78 OS=Homo sapiens OX=9606 GN=KRT78 PE=1 SV=2	+	0	0	0	0	0	0		plasma membrane
CON__Q86YZ3;Q86YZ3	Hornerin	HRNR	;Hornerin OS=Homo sapiens OX=9606 GN=HRNR PE=1 SV=2	+	38169000	0	0	0	19084500	0		cytoplasm
CON__Q9U6Y5				+	0	0	0	0	0	0		mitochondrial outer membrane
CON__Streptavidin				+	237450000000	231120000000	234150000000	224960000000	234285000000	229555000000		cytoplasm
P04264;CON__P04264	Keratin, type II cytoskeletal 1	KRT1	Keratin, type II cytoskeletal 1 OS=Homo sapiens OX=9606 GN=KRT1 PE=1 SV=6;	+	3002000000	3122500000	3213700000	3426100000	3062250000	3319900000		mitochondrial inner membrane
P07737;CON__P02584	Profilin-1	PFN1	Profilin-1 OS=Homo sapiens OX=9606 GN=PFN1 PE=1 SV=2;	+	102650000	96715000	69522000	67382000	99682500	68452000		mitochondria
P68871;CON__Q3SX09;P02042;CON__P02070;P69892;P69891;P02100	Hemoglobin subunit beta;LVV-hemorphin-7;Spinorphin;Hemoglobin subunit delta	HBB;HBD	Hemoglobin subunit beta OS=Homo sapiens OX=9606 GN=HBB PE=1 SV=2;;Hemoglobin subunit delta OS=Homo sapiens OX=9606 GN=HBD PE=1 SV=2	+	0	0	0	26385000	0	13192500		nucleus
P69905;CON__P01966	Hemoglobin subunit alpha	HBA1	Hemoglobin subunit alpha OS=Homo sapiens OX=9606 GN=HBA1 PE=1 SV=2;	+	0	0	20096000	0	0	10048000		plasma membrane
Q9UL36	Zinc finger protein 236	ZNF236	Zinc finger protein 236 OS=Homo sapiens OX=9606 GN=ZNF236 PE=2 SV=2		0	1682400000	0	0	841200000	0	1	nucleus
REV__Q8NCU4			Coiled-coil domain-containing protein 191 OS=Homo sapiens OX=9606 GN=CCDC191 PE=2 SV=1		0	397230000	0	0	198615000	0	2	mitochondria?
P61769	Beta-2-microglobulin;Beta-2-microglobulin form pI 5.3	B2M	Beta-2-microglobulin OS=Homo sapiens OX=9606 GN=B2M PE=1 SV=1		129880000	87179000	0	0	108529500	0	3	nucleus
P47813;O14602	Eukaryotic translation initiation factor 1A, X-chromosomal;Eukaryotic translation initiation factor 1A, Y-chromosomal	EIF1AX;EIF1AY	Eukaryotic translation initiation factor 1A, X-chromosomal OS=Homo sapiens OX=9606 GN=EIF1AX PE=1 SV=2;Eukaryotic translation initiation factor 1A, Y-chromosomal OS=Homo sapiens OX=9606 GN=EIF1AY PE=1 SV=4		67597000	75893000	0	0	71745000	0	4	cytoplasm
Q15041	ADP-ribosylation factor-like protein 6-interacting protein 1	ARL6IP1	ADP-ribosylation factor-like protein 6-interacting protein 1 OS=Homo sapiens OX=9606 GN=ARL6IP1 PE=1 SV=2		89742000	52855000	0	0	71298500	0	5	ER, ER shaping
P60174	Triosephosphate isomerase	TPI1	Triosephosphate isomerase OS=Homo sapiens OX=9606 GN=TPI1 PE=1 SV=3		66085000	59592000	0	0	62838500	0	6	cytoplasm
P08F94	Fibrocystin	PKHD1	Fibrocystin OS=Homo sapiens OX=9606 GN=PKHD1 PE=1 SV=1		124630000	0	0	0	62315000	0	7	plasma membrane?
Q8N4V1	Membrane magnesium transporter 1	MMGT1	Membrane magnesium transporter 1 OS=Homo sapiens OX=9606 GN=MMGT1 PE=1 SV=1		122130000	0	0	0	61065000	0	8	endomembrane/ER
Q52LJ0	Protein FAM98B	FAM98B	Protein FAM98B OS=Homo sapiens OX=9606 GN=FAM98B PE=1 SV=2		41254000	73056000	0	0	57155000	0	9	cytoplasm/nucleus
P17152	Transmembrane protein 11, mitochondrial	TMEM11	Transmembrane protein 11, mitochondrial OS=Homo sapiens OX=9606 GN=TMEM11 PE=1 SV=1		45190000	52901000	0	0	49045500	0	10	mitochondrial inner membrane
P48643	T-complex protein 1 subunit epsilon	CCT5	T-complex protein 1 subunit epsilon OS=Homo sapiens OX=9606 GN=CCT5 PE=1 SV=1		19686000	77921000	0	0	48803500	0	11	cytoplasm/cytoskeleton
Q9HBL7	Plasminogen receptor (KT)	PLGRKT	Plasminogen receptor (KT) OS=Homo sapiens OX=9606 GN=PLGRKT PE=1 SV=1		49411000	47468000	0	0	48439500	0	12	plasma membrane or mitochondria?
REV__O95714;REV__Q9BVR0			E3 ubiquitin-protein ligase HERC2 OS=Homo sapiens OX=9606 GN=HERC2 PE=1 SV=2;Putative HERC2-like protein 3 OS=Homo sapiens OX=9606 GN=HERC2P3 PE=5 SV=2		95728000	0	0	0	47864000	0	13	cytoplasm
O75592	E3 ubiquitin-protein ligase MYCBP2	MYCBP2	E3 ubiquitin-protein ligase MYCBP2 OS=Homo sapiens OX=9606 GN=MYCBP2 PE=1 SV=4		91830000	0	0	0	45915000	0	14	nucleus?
O60524	Nuclear export mediator factor NEMF	NEMF	Nuclear export mediator factor NEMF OS=Homo sapiens OX=9606 GN=NEMF PE=1 SV=4		43782000	45006000	0	0	44394000	0	15	cytoplasm
Q9H4A6	Golgi phosphoprotein 3	GOLPH3	Golgi phosphoprotein 3 OS=Homo sapiens OX=9606 GN=GOLPH3 PE=1 SV=1		49707000	36683000	0	0	43195000	0	16	golgi
O95373	Importin-7	IPO7	Importin-7 OS=Homo sapiens OX=9606 GN=IPO7 PE=1 SV=1		86143000	0	0	0	43071500	0	17	nucleus/cytoplasm
Q96DA6	Mitochondrial import inner membrane translocase subunit TIM14	DNAJC19	Mitochondrial import inner membrane translocase subunit TIM14 OS=Homo sapiens OX=9606 GN=DNAJC19 PE=1 SV=3		31460000	44627000	0	0	38043500	0	18	mitochondrial inner membrane
O95870	Abhydrolase domain-containing protein 16A	ABHD16A	Phosphatidylserine lipase ABHD16A OS=Homo sapiens OX=9606 GN=ABHD16A PE=1 SV=3		36060000	37883000	0	0	36971500	0	19	ER/mito
Q9HBH5	Retinol dehydrogenase 14	RDH14	Retinol dehydrogenase 14 OS=Homo sapiens OX=9606 GN=RDH14 PE=1 SV=1		40995000	32472000	0	0	36733500	0	20	cytoplasm?
Q9H307	Pinin	PNN	Pinin OS=Homo sapiens OX=9606 GN=PNN PE=1 SV=5		72165000	0	0	0	36082500	0	21	nucleus
Q14807	Kinesin-like protein KIF22	KIF22	Kinesin-like protein KIF22 OS=Homo sapiens OX=9606 GN=KIF22 PE=1 SV=5		37577000	34036000	0	0	35806500	0	22	cytoskeleton
P19075	Tetraspanin-8	TSPAN8	Tetraspanin-8 OS=Homo sapiens OX=9606 GN=TSPAN8 PE=1 SV=1		0	69530000	0	0	34765000	0	23	plasma membrane
P56378	6.8 kDa mitochondrial proteolipid	MP68	ATP synthase subunit ATP5MPL, mitochondrial OS=Homo sapiens OX=9606 GN=ATP5MPL PE=1 SV=1		0	67930000	0	0	33965000	0	24	mitochondria
Q8TCT8	Signal peptide peptidase-like 2A	SPPL2A	Signal peptide peptidase-like 2A OS=Homo sapiens OX=9606 GN=SPPL2A PE=1 SV=2		0	64986000	0	0	32493000	0	25	lysosome/endosome
Q5BJF2	Transmembrane protein 97	TMEM97	Sigma intracellular receptor 2 OS=Homo sapiens OX=9606 GN=TMEM97 PE=1 SV=1		0	64843000	0	0	32421500	0	26	ER membrane
P51553	Isocitrate dehydrogenase [NAD] subunit gamma, mitochondrial	IDH3G	Isocitrate dehydrogenase [NAD] subunit gamma, mitochondrial OS=Homo sapiens OX=9606 GN=IDH3G PE=1 SV=1		31739000	30368000	0	0	31053500	0	27	mitochondria
Q14699	Raftlin	RFTN1	Raftlin OS=Homo sapiens OX=9606 GN=RFTN1 PE=1 SV=4		31471000	29978000	0	0	30724500	0	28	cytoplasm?
Q9H2V7	Protein spinster homolog 1	SPNS1	Protein spinster homolog 1 OS=Homo sapiens OX=9606 GN=SPNS1 PE=1 SV=1		28395000	30500000	0	0	29447500	0	29	mitochondrial inner membrane
P20020;Q01814	Plasma membrane calcium-transporting ATPase 1	ATP2B1	Plasma membrane calcium-transporting ATPase 1 OS=Homo sapiens OX=9606 GN=ATP2B1 PE=1 SV=4		10817000	46515000	0	0	28666000	0	30	plasma membrane
Q13232	Nucleoside diphosphate kinase 3	NME3	Nucleoside diphosphate kinase 3 OS=Homo sapiens OX=9606 GN=NME3 PE=1 SV=2		31816000	24361000	0	0	28088500	0	31	cytoplasm
Q92667	A-kinase anchor protein 1, mitochondrial	AKAP1	A-kinase anchor protein 1, mitochondrial OS=Homo sapiens OX=9606 GN=AKAP1 PE=1 SV=1		24001000	30178000	0	0	27089500	0	32	mitochondrial outer membrane
P25789	Proteasome subunit alpha type-4	PSMA4	Proteasome subunit alpha type-4 OS=Homo sapiens OX=9606 GN=PSMA4 PE=1 SV=1		26154000	27575000	0	0	26864500	0	33	cytoplasm
P17568	NADH dehydrogenase [ubiquinone] 1 beta subcomplex subunit 7	NDUFB7	NADH dehydrogenase [ubiquinone] 1 beta subcomplex subunit 7 OS=Homo sapiens OX=9606 GN=NDUFB7 PE=1 SV=4		24402000	28810000	0	0	26606000	0	34	mitochondrial inner membrane
Q9P032	NADH dehydrogenase [ubiquinone] 1 alpha subcomplex assembly factor 4	NDUFAF4	NADH dehydrogenase [ubiquinone] 1 alpha subcomplex assembly factor 4 OS=Homo sapiens OX=9606 GN=NDUFAF4 PE=1 SV=1		28991000	23176000	0	0	26083500	0	35	mitochondria
Q9UGY1	Nucleolar protein 12	NOL12	Nucleolar protein 12 OS=Homo sapiens OX=9606 GN=NOL12 PE=1 SV=1		23718000	28066000	0	0	25892000	0	36	nucleus
P32970	CD70 antigen	CD70	CD70 antigen OS=Homo sapiens OX=9606 GN=CD70 PE=1 SV=2		50799000	0	0	0	25399500	0	37	plasma membrane
Q9Y2S6	Translation machinery-associated protein 7	TMA7	Translation machinery-associated protein 7 OS=Homo sapiens OX=9606 GN=TMA7 PE=1 SV=1		0	49254000	0	0	24627000	0	38	nucleus?
Q6UVK1	Chondroitin sulfate proteoglycan 4	CSPG4	Chondroitin sulfate proteoglycan 4 OS=Homo sapiens OX=9606 GN=CSPG4 PE=1 SV=2		0	48793000	0	0	24396500	0	39	plasma membrane
P0C7P0	CDGSH iron-sulfur domain-containing protein 3, mitochondrial	CISD3	CDGSH iron-sulfur domain-containing protein 3, mitochondrial OS=Homo sapiens OX=9606 GN=CISD3 PE=1 SV=1		48359000	0	0	0	24179500	0	40	mitochondria
O60725	Protein-S-isoprenylcysteine O-methyltransferase	ICMT	Protein-S-isoprenylcysteine O-methyltransferase OS=Homo sapiens OX=9606 GN=ICMT PE=1 SV=1		47812000	0	0	0	23906000	0	41	ER membrane
Q9NW64	Pre-mRNA-splicing factor RBM22	RBM22	Pre-mRNA-splicing factor RBM22 OS=Homo sapiens OX=9606 GN=RBM22 PE=1 SV=1		27330000	19762000	0	0	23546000	0	42	cytoplasm/nucleus
O14646	Chromodomain-helicase-DNA-binding protein 1	CHD1	Chromodomain-helicase-DNA-binding protein 1 OS=Homo sapiens OX=9606 GN=CHD1 PE=1 SV=2		24041000	22593000	0	0	23317000	0	43	cytoplasm/nucleus
Q9NX61	Transmembrane protein 161A	TMEM161A	Transmembrane protein 161A OS=Homo sapiens OX=9606 GN=TMEM161A PE=1 SV=1		0	45742000	0	0	22871000	0	44	membrane?
Q9BRG1	Vacuolar protein-sorting-associated protein 25	VPS25	Vacuolar protein-sorting-associated protein 25 OS=Homo sapiens OX=9606 GN=VPS25 PE=1 SV=1		12628000	32435000	0	0	22531500	0	45	cytoplasm
P15153	Ras-related C3 botulinum toxin substrate 2	RAC2	Ras-related C3 botulinum toxin substrate 2 OS=Homo sapiens OX=9606 GN=RAC2 PE=1 SV=1		0	43920000	0	0	21960000	0	46	cytoplasm
Q12824	SWI/SNF-related matrix-associated actin-dependent regulator of chromatin subfamily B member 1	SMARCB1	SWI/SNF-related matrix-associated actin-dependent regulator of chromatin subfamily B member 1 OS=Homo sapiens OX=9606 GN=SMARCB1 PE=1 SV=2		42516000	0	0	0	21258000	0	47	cytoplasm
P51798	H(+)/Cl(-) exchange transporter 7	CLCN7	H(+)/Cl(-) exchange transporter 7 OS=Homo sapiens OX=9606 GN=CLCN7 PE=1 SV=2		0	42251000	0	0	21125500	0	48	lysosome
Q8NE86	Calcium uniporter protein, mitochondrial	MCU	Calcium uniporter protein, mitochondrial OS=Homo sapiens OX=9606 GN=MCU PE=1 SV=1		23634000	18368000	0	0	21001000	0	49	mitochondria
Q9Y5A9	YTH domain-containing family protein 2	YTHDF2	YTH domain-containing family protein 2 OS=Homo sapiens OX=9606 GN=YTHDF2 PE=1 SV=2		40918000	0	0	0	20459000	0	50	cytoplasm/nucleus
Q9UBQ7	Glyoxylate reductase/hydroxypyruvate reductase	GRHPR	Glyoxylate reductase/hydroxypyruvate reductase OS=Homo sapiens OX=9606 GN=GRHPR PE=1 SV=1		19159000	21504000	0	0	20331500	0	51
O43427	Acidic fibroblast growth factor intracellular-binding protein	FIBP	Acidic fibroblast growth factor intracellular-binding protein OS=Homo sapiens OX=9606 GN=FIBP PE=1 SV=3		40401000	0	0	0	20200500	0	52
P38435	Vitamin K-dependent gamma-carboxylase	GGCX	Vitamin K-dependent gamma-carboxylase OS=Homo sapiens OX=9606 GN=GGCX PE=1 SV=2		18352000	21784000	0	0	20068000	0	53
Q9Y237	Peptidyl-prolyl cis-trans isomerase NIMA-interacting 4	PIN4	Peptidyl-prolyl cis-trans isomerase NIMA-interacting 4 OS=Homo sapiens OX=9606 GN=PIN4 PE=1 SV=1		20177000	19900000	0	0	20038500	0	54
Q9UHQ4	B-cell receptor-associated protein 29	BCAP29	B-cell receptor-associated protein 29 OS=Homo sapiens OX=9606 GN=BCAP29 PE=1 SV=2		0	39705000	0	0	19852500	0	55
O75648	Mitochondrial tRNA-specific 2-thiouridylase 1	TRMU	Mitochondrial tRNA-specific 2-thiouridylase 1 OS=Homo sapiens OX=9606 GN=TRMU PE=1 SV=2		39150000	0	0	0	19575000	0	56
Q02487	Desmocollin-2	DSC2	Desmocollin-2 OS=Homo sapiens OX=9606 GN=DSC2 PE=1 SV=1		38557000	0	0	0	19278500	0	57
Q15014	Mortality factor 4-like protein 2	MORF4L2	Mortality factor 4-like protein 2 OS=Homo sapiens OX=9606 GN=MORF4L2 PE=1 SV=1		37698000	0	0	0	18849000	0	58
P14868	Aspartate--tRNA ligase, cytoplasmic	DARS	Aspartate--tRNA ligase, cytoplasmic OS=Homo sapiens OX=9606 GN=DARS PE=1 SV=2		17925000	19547000	0	0	18736000	0	59
P27701	CD82 antigen	CD82	CD82 antigen OS=Homo sapiens OX=9606 GN=CD82 PE=1 SV=1		0	37139000	0	0	18569500	0	60
Q15459	Splicing factor 3A subunit 1	SF3A1	Splicing factor 3A subunit 1 OS=Homo sapiens OX=9606 GN=SF3A1 PE=1 SV=1		14974000	22039000	0	0	18506500	0	61
Q9BTE1	Dynactin subunit 5	DCTN5	Dynactin subunit 5 OS=Homo sapiens OX=9606 GN=DCTN5 PE=1 SV=1		17173000	19331000	0	0	18252000	0	62
P49406	39S ribosomal protein L19, mitochondrial	MRPL19	39S ribosomal protein L19, mitochondrial OS=Homo sapiens OX=9606 GN=MRPL19 PE=1 SV=2		36439000	0	0	0	18219500	0	63
Q8N6H7	ADP-ribosylation factor GTPase-activating protein 2	ARFGAP2	ADP-ribosylation factor GTPase-activating protein 2 OS=Homo sapiens OX=9606 GN=ARFGAP2 PE=1 SV=1		36253000	0	0	0	18126500	0	64
P60891	Ribose-phosphate pyrophosphokinase 1	PRPS1	Ribose-phosphate pyrophosphokinase 1 OS=Homo sapiens OX=9606 GN=PRPS1 PE=1 SV=2		36140000	0	0	0	18070000	0	65
Q9UHA4	Ragulator complex protein LAMTOR3	LAMTOR3	Ragulator complex protein LAMTOR3 OS=Homo sapiens OX=9606 GN=LAMTOR3 PE=1 SV=1		36037000	0	0	0	18018500	0	66
Q8NCA5	Protein FAM98A	FAM98A	Protein FAM98A OS=Homo sapiens OX=9606 GN=FAM98A PE=1 SV=2		35810000	0	0	0	17905000	0	67
Q01518	Adenylyl cyclase-associated protein 1	CAP1	Adenylyl cyclase-associated protein 1 OS=Homo sapiens OX=9606 GN=CAP1 PE=1 SV=5		18207000	17471000	0	0	17839000	0	68
Q9H019	Mitochondrial fission regulator 1-like	MTFR1L	Mitochondrial fission regulator 1-like OS=Homo sapiens OX=9606 GN=MTFR1L PE=1 SV=2		17731000	17348000	0	0	17539500	0	69
Q53FV1	ORM1-like protein 2	ORMDL2	ORM1-like protein 2 OS=Homo sapiens OX=9606 GN=ORMDL2 PE=1 SV=2		34619000	0	0	0	17309500	0	70
P30838	Aldehyde dehydrogenase, dimeric NADP-preferring	ALDH3A1	Aldehyde dehydrogenase, dimeric NADP-preferring OS=Homo sapiens OX=9606 GN=ALDH3A1 PE=1 SV=3		33976000	0	0	0	16988000	0	71
P51965;Q96LR5;Q969T4	Ubiquitin-conjugating enzyme E2 E1;Ubiquitin-conjugating enzyme E2 E2;Ubiquitin-conjugating enzyme E2 E3	UBE2E1;UBE2E2;UBE2E3	Ubiquitin-conjugating enzyme E2 E1 OS=Homo sapiens OX=9606 GN=UBE2E1 PE=1 SV=1;Ubiquitin-conjugating enzyme E2 E2 OS=Homo sapiens OX=9606 GN=UBE2E2 PE=1 SV=1;Ubiquitin-conjugating enzyme E2 E3 OS=Homo sapiens OX=9606 GN=UBE2E3 PE=1 SV=1		18924000	14496000	0	0	16710000	0	72
O14569	Cytochrome b561 domain-containing protein 2	CYB561D2	Cytochrome b561 domain-containing protein 2 OS=Homo sapiens OX=9606 GN=CYB561D2 PE=1 SV=1		33324000	0	0	0	16662000	0	73
Q13330	Metastasis-associated protein MTA1	MTA1	Metastasis-associated protein MTA1 OS=Homo sapiens OX=9606 GN=MTA1 PE=1 SV=2		11475000	19610000	0	0	15542500	0	74
O14494	Lipid phosphate phosphohydrolase 1	PPAP2A	Phospholipid phosphatase 1 OS=Homo sapiens OX=9606 GN=PLPP1 PE=1 SV=1		17590000	13389000	0	0	15489500	0	75
Q969Z3	Mitochondrial amidoxime reducing component 2	2022-03-02	Mitochondrial amidoxime reducing component 2 OS=Homo sapiens OX=9606 GN=MARC2 PE=1 SV=1		16458000	14343000	0	0	15400500	0	76
O14617	AP-3 complex subunit delta-1	AP3D1	AP-3 complex subunit delta-1 OS=Homo sapiens OX=9606 GN=AP3D1 PE=1 SV=1		14813000	15828000	0	0	15320500	0	77
P49721	Proteasome subunit beta type-2	PSMB2	Proteasome subunit beta type-2 OS=Homo sapiens OX=9606 GN=PSMB2 PE=1 SV=1		0	30489000	0	0	15244500	0	78
Q9H089	Large subunit GTPase 1 homolog	LSG1	Large subunit GTPase 1 homolog OS=Homo sapiens OX=9606 GN=LSG1 PE=1 SV=2		13512000	16962000	0	0	15237000	0	79
Q9Y287	Integral membrane protein 2B;BRI2, membrane form;BRI2 intracellular domain;BRI2C, soluble form;Bri23 peptide	ITM2B	Integral membrane protein 2B OS=Homo sapiens OX=9606 GN=ITM2B PE=1 SV=1		0	30411000	0	0	15205500	0	80
O95864	Fatty acid desaturase 2	FADS2	Acyl-CoA 6-desaturase OS=Homo sapiens OX=9606 GN=FADS2 PE=1 SV=1		0	30192000	0	0	15096000	0	81
P53618	Coatomer subunit beta	COPB1	Coatomer subunit beta OS=Homo sapiens OX=9606 GN=COPB1 PE=1 SV=3		14334000	15712000	0	0	15023000	0	82
Q7Z434	Mitochondrial antiviral-signaling protein	MAVS	Mitochondrial antiviral-signaling protein OS=Homo sapiens OX=9606 GN=MAVS PE=1 SV=2		0	29712000	0	0	14856000	0	83
Q629K1	Triple QxxK/R motif-containing protein	TRIQK	Triple QxxK/R motif-containing protein OS=Homo sapiens OX=9606 GN=TRIQK PE=3 SV=1		29521000	0	0	0	14760500	0	84
P62070	Ras-related protein R-Ras2	RRAS2	Ras-related protein R-Ras2 OS=Homo sapiens OX=9606 GN=RRAS2 PE=1 SV=1		0	29331000	0	0	14665500	0	85
O75151	Lysine-specific demethylase PHF2	PHF2	Lysine-specific demethylase PHF2 OS=Homo sapiens OX=9606 GN=PHF2 PE=1 SV=4		13881000	14791000	0	0	14336000	0	86
Q9BVI4	Nucleolar complex protein 4 homolog	NOC4L	Nucleolar complex protein 4 homolog OS=Homo sapiens OX=9606 GN=NOC4L PE=1 SV=1		13005000	15568000	0	0	14286500	0	87
Q9BYD6	39S ribosomal protein L1, mitochondrial	MRPL1	39S ribosomal protein L1, mitochondrial OS=Homo sapiens OX=9606 GN=MRPL1 PE=1 SV=2		16344000	12183000	0	0	14263500	0	88
O14818;Q8TAA3	Proteasome subunit alpha type-7	PSMA7	Proteasome subunit alpha type-7 OS=Homo sapiens OX=9606 GN=PSMA7 PE=1 SV=1		28201000	0	0	0	14100500	0	89
Q9Y6N1	Cytochrome c oxidase assembly protein COX11, mitochondrial	COX11	Cytochrome c oxidase assembly protein COX11, mitochondrial OS=Homo sapiens OX=9606 GN=COX11 PE=1 SV=3		14416000	13743000	0	0	14079500	0	90
O14980	Exportin-1	XPO1	Exportin-1 OS=Homo sapiens OX=9606 GN=XPO1 PE=1 SV=1		20038000	7924100	0	0	13981050	0	91
P14324	Farnesyl pyrophosphate synthase	FDPS	Farnesyl pyrophosphate synthase OS=Homo sapiens OX=9606 GN=FDPS PE=1 SV=4		0	27847000	0	0	13923500	0	92
P82909	28S ribosomal protein S36, mitochondrial	MRPS36	28S ribosomal protein S36, mitochondrial OS=Homo sapiens OX=9606 GN=MRPS36 PE=1 SV=2		26946000	0	0	0	13473000	0	93
Q96FJ0	AMSH-like protease	STAMBPL1	AMSH-like protease OS=Homo sapiens OX=9606 GN=STAMBPL1 PE=1 SV=2		14674000	11933000	0	0	13303500	0	94
Q9NTJ3	Structural maintenance of chromosomes protein 4	SMC4	Structural maintenance of chromosomes protein 4 OS=Homo sapiens OX=9606 GN=SMC4 PE=1 SV=2		0	26571000	0	0	13285500	0	95
Q11201;Q16842	CMP-N-acetylneuraminate-beta-galactosamide-alpha-2,3-sialyltransferase 1	ST3GAL1	CMP-N-acetylneuraminate-beta-galactosamide-alpha-2,3-sialyltransferase 1 OS=Homo sapiens OX=9606 GN=ST3GAL1 PE=2 SV=1		0	26553000	0	0	13276500	0	96
Q9H4L4	Sentrin-specific protease 3	SENP3	Sentrin-specific protease 3 OS=Homo sapiens OX=9606 GN=SENP3 PE=1 SV=2		26455000	0	0	0	13227500	0	97
O60287	Nucleolar pre-ribosomal-associated protein 1	URB1	Nucleolar pre-ribosomal-associated protein 1 OS=Homo sapiens OX=9606 GN=URB1 PE=1 SV=4		13870000	12350000	0	0	13110000	0	98
Q96A72	Protein mago nashi homolog 2	MAGOHB	Protein mago nashi homolog 2 OS=Homo sapiens OX=9606 GN=MAGOHB PE=1 SV=1		0	26024000	0	0	13012000	0	99
O15438	Canalicular multispecific organic anion transporter 2	ABCC3	Canalicular multispecific organic anion transporter 2 OS=Homo sapiens OX=9606 GN=ABCC3 PE=1 SV=3		13429000	12518000	0	0	12973500	0	100
Q9Y5T4	DnaJ homolog subfamily C member 15	DNAJC15	DnaJ homolog subfamily C member 15 OS=Homo sapiens OX=9606 GN=DNAJC15 PE=1 SV=2		0	25572000	0	0	12786000	0	101
O75817	Ribonuclease P protein subunit p20	POP7	Ribonuclease P protein subunit p20 OS=Homo sapiens OX=9606 GN=POP7 PE=1 SV=2		0	25395000	0	0	12697500	0	102
Q9BUF5	Tubulin beta-6 chain	TUBB6	Tubulin beta-6 chain OS=Homo sapiens OX=9606 GN=TUBB6 PE=1 SV=1		24938000	0	0	0	12469000	0	103
O43747	AP-1 complex subunit gamma-1	AP1G1	AP-1 complex subunit gamma-1 OS=Homo sapiens OX=9606 GN=AP1G1 PE=1 SV=5		24617000	0	0	0	12308500	0	104
Q7Z406	Myosin-14	MYH14	Myosin-14 OS=Homo sapiens OX=9606 GN=MYH14 PE=1 SV=2		24584000	0	0	0	12292000	0	105
P62306	Small nuclear ribonucleoprotein F	SNRPF	Small nuclear ribonucleoprotein F OS=Homo sapiens OX=9606 GN=SNRPF PE=1 SV=1		0	24472000	0	0	12236000	0	106
P62312	U6 snRNA-associated Sm-like protein LSm6	LSM6	U6 snRNA-associated Sm-like protein LSm6 OS=Homo sapiens OX=9606 GN=LSM6 PE=1 SV=1		0	24279000	0	0	12139500	0	107
REV__P20020			Plasma membrane calcium-transporting ATPase 1 OS=Homo sapiens OX=9606 GN=ATP2B1 PE=1 SV=4		23931000	0	0	0	11965500	0	108
P78346	Ribonuclease P protein subunit p30	RPP30	Ribonuclease P protein subunit p30 OS=Homo sapiens OX=9606 GN=RPP30 PE=1 SV=1		14651000	9103900	0	0	11877450	0	109
Q8N6L1	Keratinocyte-associated protein 2	KRTCAP2	Keratinocyte-associated protein 2 OS=Homo sapiens OX=9606 GN=KRTCAP2 PE=1 SV=2		0	23395000	0	0	11697500	0	110
Q15046	Lysine--tRNA ligase	KARS	Lysine--tRNA ligase OS=Homo sapiens OX=9606 GN=KARS1 PE=1 SV=3		11148000	12070000	0	0	11609000	0	111
O43426	Synaptojanin-1	SYNJ1	Synaptojanin-1 OS=Homo sapiens OX=9606 GN=SYNJ1 PE=1 SV=2		0	23095000	0	0	11547500	0	112
Q9BVL2	Nucleoporin p58/p45	NUPL1	Nucleoporin p58/p45 OS=Homo sapiens OX=9606 GN=NUP58 PE=1 SV=1		10069000	12678000	0	0	11373500	0	113
P38646	Stress-70 protein, mitochondrial	HSPA9	Stress-70 protein, mitochondrial OS=Homo sapiens OX=9606 GN=HSPA9 PE=1 SV=2		22545000	0	0	0	11272500	0	114
P25445	Tumor necrosis factor receptor superfamily member 6	FAS	Tumor necrosis factor receptor superfamily member 6 OS=Homo sapiens OX=9606 GN=FAS PE=1 SV=1		0	22330000	0	0	11165000	0	115
P31930	Cytochrome b-c1 complex subunit 1, mitochondrial	UQCRC1	Cytochrome b-c1 complex subunit 1, mitochondrial OS=Homo sapiens OX=9606 GN=UQCRC1 PE=1 SV=3		0	21634000	0	0	10817000	0	116
Q7Z2W9	39S ribosomal protein L21, mitochondrial	MRPL21	39S ribosomal protein L21, mitochondrial OS=Homo sapiens OX=9606 GN=MRPL21 PE=1 SV=2		13183000	8432500	0	0	10807750	0	117
Q9BUL8	Programmed cell death protein 10	PDCD10	Programmed cell death protein 10 OS=Homo sapiens OX=9606 GN=PDCD10 PE=1 SV=1		0	20982000	0	0	10491000	0	118
O95674	Phosphatidate cytidylyltransferase 2	CDS2	Phosphatidate cytidylyltransferase 2 OS=Homo sapiens OX=9606 GN=CDS2 PE=1 SV=1		0	20876000	0	0	10438000	0	119
Q01813	ATP-dependent 6-phosphofructokinase, platelet type	PFKP	ATP-dependent 6-phosphofructokinase, platelet type OS=Homo sapiens OX=9606 GN=PFKP PE=1 SV=2		0	20375000	0	0	10187500	0	120
Q8WWC4	Uncharacterized protein C2orf47, mitochondrial	C2orf47	m-AAA protease-interacting protein 1, mitochondrial OS=Homo sapiens OX=9606 GN=MAIP1 PE=1 SV=1		20050000	0	0	0	10025000	0	121
O95819;Q8N4C8;Q9UKE5	Mitogen-activated protein kinase kinase kinase kinase 4;Misshapen-like kinase 1;TRAF2 and NCK-interacting protein kinase	MAP4K4;MINK1;TNIK	Mitogen-activated protein kinase kinase kinase kinase 4 OS=Homo sapiens OX=9606 GN=MAP4K4 PE=1 SV=2;Misshapen-like kinase 1 OS=Homo sapiens OX=9606 GN=MINK1 PE=1 SV=2;TRAF2 and NCK-interacting protein kinase OS=Homo sapiens OX=9606 GN=TNIK PE=1 SV=1		19935000	0	0	0	9967500	0	122
O60353	Frizzled-6	FZD6	Frizzled-6 OS=Homo sapiens OX=9606 GN=FZD6 PE=1 SV=2		0	19651000	0	0	9825500	0	123
Q9NQW6	Actin-binding protein anillin	ANLN	Anillin OS=Homo sapiens OX=9606 GN=ANLN PE=1 SV=2		0	19389000	0	0	9694500	0	124
Q15650	Activating signal cointegrator 1	TRIP4	Activating signal cointegrator 1 OS=Homo sapiens OX=9606 GN=TRIP4 PE=1 SV=4		0	19381000	0	0	9690500	0	125
Q9H0H5	Rac GTPase-activating protein 1	RACGAP1	Rac GTPase-activating protein 1 OS=Homo sapiens OX=9606 GN=RACGAP1 PE=1 SV=1		19228000	0	0	0	9614000	0	126
Q9NRZ7	1-acyl-sn-glycerol-3-phosphate acyltransferase gamma	AGPAT3	1-acyl-sn-glycerol-3-phosphate acyltransferase gamma OS=Homo sapiens OX=9606 GN=AGPAT3 PE=1 SV=1		0	19190000	0	0	9595000	0	127
Q68D85	Natural cytotoxicity triggering receptor 3 ligand 1	NCR3LG1	Natural cytotoxicity triggering receptor 3 ligand 1 OS=Homo sapiens OX=9606 GN=NCR3LG1 PE=1 SV=1		0	19149000	0	0	9574500	0	128
Q9GZT9;Q9H6Z9	Egl nine homolog 1	EGLN1	Egl nine homolog 1 OS=Homo sapiens OX=9606 GN=EGLN1 PE=1 SV=1		19074000	0	0	0	9537000	0	129
Q9UMS4	Pre-mRNA-processing factor 19	PRPF19	Pre-mRNA-processing factor 19 OS=Homo sapiens OX=9606 GN=PRPF19 PE=1 SV=1		0	18954000	0	0	9477000	0	130
P49916	DNA ligase 3	LIG3	DNA ligase 3 OS=Homo sapiens OX=9606 GN=LIG3 PE=1 SV=2		0	18864000	0	0	9432000	0	131
P51532	Transcription activator BRG1	SMARCA4	Transcription activator BRG1 OS=Homo sapiens OX=9606 GN=SMARCA4 PE=1 SV=2		18860000	0	0	0	9430000	0	132
Q14694	Ubiquitin carboxyl-terminal hydrolase 10	USP10	Ubiquitin carboxyl-terminal hydrolase 10 OS=Homo sapiens OX=9606 GN=USP10 PE=1 SV=2		0	18763000	0	0	9381500	0	133
Q16763	Ubiquitin-conjugating enzyme E2 S	UBE2S	Ubiquitin-conjugating enzyme E2 S OS=Homo sapiens OX=9606 GN=UBE2S PE=1 SV=2		18640000	0	0	0	9320000	0	134
Q9UPZ3	Hermansky-Pudlak syndrome 5 protein	HPS5	Hermansky-Pudlak syndrome 5 protein OS=Homo sapiens OX=9606 GN=HPS5 PE=1 SV=2		18074000	0	0	0	9037000	0	135
P27144	Adenylate kinase 4, mitochondrial	AK4	Adenylate kinase 4, mitochondrial OS=Homo sapiens OX=9606 GN=AK4 PE=1 SV=1		17988000	0	0	0	8994000	0	136
P30260	Cell division cycle protein 27 homolog	CDC27	Cell division cycle protein 27 homolog OS=Homo sapiens OX=9606 GN=CDC27 PE=1 SV=2		0	17868000	0	0	8934000	0	137
O95167	NADH dehydrogenase [ubiquinone] 1 alpha subcomplex subunit 3	NDUFA3	NADH dehydrogenase [ubiquinone] 1 alpha subcomplex subunit 3 OS=Homo sapiens OX=9606 GN=NDUFA3 PE=1 SV=1		0	17717000	0	0	8858500	0	138
P32455;Q9H0R5;P32456	Interferon-induced guanylate-binding protein 1	GBP1	Guanylate-binding protein 1 OS=Homo sapiens OX=9606 GN=GBP1 PE=1 SV=2		17574000	0	0	0	8787000	0	139
P08758	Annexin A5	ANXA5	Annexin A5 OS=Homo sapiens OX=9606 GN=ANXA5 PE=1 SV=2		0	17234000	0	0	8617000	0	140
Q15059	Bromodomain-containing protein 3	BRD3	Bromodomain-containing protein 3 OS=Homo sapiens OX=9606 GN=BRD3 PE=1 SV=1		17048000	0	0	0	8524000	0	141
P22314	Ubiquitin-like modifier-activating enzyme 1	UBA1	Ubiquitin-like modifier-activating enzyme 1 OS=Homo sapiens OX=9606 GN=UBA1 PE=1 SV=3		7802700	9226300	0	0	8514500	0	142
Q9HAU0	Pleckstrin homology domain-containing family A member 5	PLEKHA5	Pleckstrin homology domain-containing family A member 5 OS=Homo sapiens OX=9606 GN=PLEKHA5 PE=1 SV=1		0	16950000	0	0	8475000	0	143
P62807;Q99879;Q99877;P58876;Q99880	Histone H2B type 1-C/E/F/G/I;Histone H2B type 1-M;Histone H2B type 1-N;Histone H2B type 1-D;Histone H2B type 1-L	HIST1H2BC;HIST1H2BM;HIST1H2BN;HIST1H2BD;HIST1H2BL	Histone H2B type 1-C/E/F/G/I OS=Homo sapiens OX=9606 GN=H2BC4 PE=1 SV=4;Histone H2B type 1-M OS=Homo sapiens OX=9606 GN=H2BC14 PE=1 SV=3;Histone H2B type 1-N OS=Homo sapiens OX=9606 GN=H2BC15 PE=1 SV=3;Histone H2B type 1-D OS=Homo sapiens OX=9606 GN=HIST1H		16797000	0	0	0	8398500	0	144
Q9BVV7	Mitochondrial import inner membrane translocase subunit Tim21	TIMM21	Mitochondrial import inner membrane translocase subunit Tim21 OS=Homo sapiens OX=9606 GN=TIMM21 PE=1 SV=1		0	16749000	0	0	8374500	0	145
Q9Y2T2;P53677	AP-3 complex subunit mu-1	AP3M1	AP-3 complex subunit mu-1 OS=Homo sapiens OX=9606 GN=AP3M1 PE=1 SV=1		16621000	0	0	0	8310500	0	146
Q96GM8	Target of EGR1 protein 1	TOE1	Target of EGR1 protein 1 OS=Homo sapiens OX=9606 GN=TOE1 PE=1 SV=1		16358000	0	0	0	8179000	0	147
Q8WUY8	N-acetyltransferase 14	NAT14	N-acetyltransferase 14 OS=Homo sapiens OX=9606 GN=NAT14 PE=1 SV=1		15972000	0	0	0	7986000	0	148
O43181	NADH dehydrogenase [ubiquinone] iron-sulfur protein 4, mitochondrial	NDUFS4	NADH dehydrogenase [ubiquinone] iron-sulfur protein 4, mitochondrial OS=Homo sapiens OX=9606 GN=NDUFS4 PE=1 SV=1		15919000	0	0	0	7959500	0	149
P50552	Vasodilator-stimulated phosphoprotein	VASP	Vasodilator-stimulated phosphoprotein OS=Homo sapiens OX=9606 GN=VASP PE=1 SV=3		7816500	8098500	0	0	7957500	0	150
A0PJW6	Transmembrane protein 223	TMEM223	Transmembrane protein 223 OS=Homo sapiens OX=9606 GN=TMEM223 PE=1 SV=1		0	15730000	0	0	7865000	0	151
Q8N983	39S ribosomal protein L43, mitochondrial	MRPL43	39S ribosomal protein L43, mitochondrial OS=Homo sapiens OX=9606 GN=MRPL43 PE=1 SV=1		0	15655000	0	0	7827500	0	152
Q14241	Transcription elongation factor B polypeptide 3	TCEB3	Elongin-A OS=Homo sapiens OX=9606 GN=ELOA PE=1 SV=2		0	15646000	0	0	7823000	0	153
Q6UB35	Monofunctional C1-tetrahydrofolate synthase, mitochondrial	MTHFD1L	Monofunctional C1-tetrahydrofolate synthase, mitochondrial OS=Homo sapiens OX=9606 GN=MTHFD1L PE=1 SV=1		0	15385000	0	0	7692500	0	154
Q96S66	Chloride channel CLIC-like protein 1	CLCC1	Chloride channel CLIC-like protein 1 OS=Homo sapiens OX=9606 GN=CLCC1 PE=1 SV=1		0	15302000	0	0	7651000	0	155
Q96ER9	Coiled-coil domain-containing protein 51	CCDC51	Mitochondrial potassium channel OS=Homo sapiens OX=9606 GN=CCDC51 PE=1 SV=2		15031000	0	0	0	7515500	0	156
O15162	Phospholipid scramblase 1	PLSCR1	Phospholipid scramblase 1 OS=Homo sapiens OX=9606 GN=PLSCR1 PE=1 SV=1		0	14950000	0	0	7475000	0	157
P30405	Peptidyl-prolyl cis-trans isomerase F, mitochondrial	PPIF	Peptidyl-prolyl cis-trans isomerase F, mitochondrial OS=Homo sapiens OX=9606 GN=PPIF PE=1 SV=1		14934000	0	0	0	7467000	0	158
Q04837	Single-stranded DNA-binding protein, mitochondrial	SSBP1	Single-stranded DNA-binding protein, mitochondrial OS=Homo sapiens OX=9606 GN=SSBP1 PE=1 SV=1		14909000	0	0	0	7454500	0	159
Q9UNF1;Q12816;Q9Y5V3	Melanoma-associated antigen D2	MAGED2	Melanoma-associated antigen D2 OS=Homo sapiens OX=9606 GN=MAGED2 PE=1 SV=2		9358900	5354600	0	0	7356750	0	160
Q8N2G8	GH3 domain-containing protein	GHDC	GH3 domain-containing protein OS=Homo sapiens OX=9606 GN=GHDC PE=1 SV=2		14498000	0	0	0	7249000	0	161
Q8IY17	Neuropathy target esterase	PNPLA6	Neuropathy target esterase OS=Homo sapiens OX=9606 GN=PNPLA6 PE=1 SV=3		0	14476000	0	0	7238000	0	162
O14966	Ras-related protein Rab-7L1	RAB29	Ras-related protein Rab-7L1 OS=Homo sapiens OX=9606 GN=RAB29 PE=1 SV=1		14211000	0	0	0	7105500	0	163
Q8IVS2	Malonyl-CoA-acyl carrier protein transacylase, mitochondrial	MCAT	Malonyl-CoA-acyl carrier protein transacylase, mitochondrial OS=Homo sapiens OX=9606 GN=MCAT PE=1 SV=2		14124000	0	0	0	7062000	0	164
P54819	Adenylate kinase 2, mitochondrial;Adenylate kinase 2, mitochondrial, N-terminally processed	AK2	Adenylate kinase 2, mitochondrial OS=Homo sapiens OX=9606 GN=AK2 PE=1 SV=2		0	14111000	0	0	7055500	0	165
Q14157	Ubiquitin-associated protein 2-like	UBAP2L	Ubiquitin-associated protein 2-like OS=Homo sapiens OX=9606 GN=UBAP2L PE=1 SV=2		0	14058000	0	0	7029000	0	166
O43678	NADH dehydrogenase [ubiquinone] 1 alpha subcomplex subunit 2	NDUFA2	NADH dehydrogenase [ubiquinone] 1 alpha subcomplex subunit 2 OS=Homo sapiens OX=9606 GN=NDUFA2 PE=1 SV=3		0	14008000	0	0	7004000	0	167
Q86YP4	Transcriptional repressor p66-alpha	GATAD2A	Transcriptional repressor p66-alpha OS=Homo sapiens OX=9606 GN=GATAD2A PE=1 SV=1		0	13820000	0	0	6910000	0	168
O00401	Neural Wiskott-Aldrich syndrome protein	WASL	Neural Wiskott-Aldrich syndrome protein OS=Homo sapiens OX=9606 GN=WASL PE=1 SV=2		0	13062000	0	0	6531000	0	169
P52594	Arf-GAP domain and FG repeat-containing protein 1	AGFG1	Arf-GAP domain and FG repeat-containing protein 1 OS=Homo sapiens OX=9606 GN=AGFG1 PE=1 SV=2		13032000	0	0	0	6516000	0	170
Q13795	ADP-ribosylation factor-related protein 1	ARFRP1	ADP-ribosylation factor-related protein 1 OS=Homo sapiens OX=9606 GN=ARFRP1 PE=1 SV=1		12897000	0	0	0	6448500	0	171
O60841	Eukaryotic translation initiation factor 5B	EIF5B	Eukaryotic translation initiation factor 5B OS=Homo sapiens OX=9606 GN=EIF5B PE=1 SV=4		12687000	0	0	0	6343500	0	172
P18206	Vinculin	VCL	Vinculin OS=Homo sapiens OX=9606 GN=VCL PE=1 SV=4		12636000	0	0	0	6318000	0	173
Q96HC4	PDZ and LIM domain protein 5	PDLIM5	PDZ and LIM domain protein 5 OS=Homo sapiens OX=9606 GN=PDLIM5 PE=1 SV=5		12615000	0	0	0	6307500	0	174
Q9Y265	RuvB-like 1	RUVBL1	RuvB-like 1 OS=Homo sapiens OX=9606 GN=RUVBL1 PE=1 SV=1		0	12398000	0	0	6199000	0	175
Q86SJ2	Amphoterin-induced protein 2	AMIGO2	Amphoterin-induced protein 2 OS=Homo sapiens OX=9606 GN=AMIGO2 PE=1 SV=1		0	12396000	0	0	6198000	0	176
P40227	T-complex protein 1 subunit zeta	CCT6A	T-complex protein 1 subunit zeta OS=Homo sapiens OX=9606 GN=CCT6A PE=1 SV=3		12189000	0	0	0	6094500	0	177
Q5VZL5	Zinc finger MYM-type protein 4	ZMYM4	Zinc finger MYM-type protein 4 OS=Homo sapiens OX=9606 GN=ZMYM4 PE=1 SV=1		0	12166000	0	0	6083000	0	178
Q96SK2	Transmembrane protein 209	TMEM209	Transmembrane protein 209 OS=Homo sapiens OX=9606 GN=TMEM209 PE=1 SV=2		11992000	0	0	0	5996000	0	179
O60830	Mitochondrial import inner membrane translocase subunit Tim17-B	TIMM17B	Mitochondrial import inner membrane translocase subunit Tim17-B OS=Homo sapiens OX=9606 GN=TIMM17B PE=1 SV=1		0	11945000	0	0	5972500	0	180
Q01995	Transgelin	TAGLN	Transgelin OS=Homo sapiens OX=9606 GN=TAGLN PE=1 SV=4		11775000	0	0	0	5887500	0	181
Q9NQG1	Protein MANBAL	MANBAL	Protein MANBAL OS=Homo sapiens OX=9606 GN=MANBAL PE=1 SV=1		0	11772000	0	0	5886000	0	182
Q9Y487	V-type proton ATPase 116 kDa subunit a isoform 2	ATP6V0A2	V-type proton ATPase 116 kDa subunit a isoform 2 OS=Homo sapiens OX=9606 GN=ATP6V0A2 PE=1 SV=2		0	11600000	0	0	5800000	0	183
Q9Y4C8	Probable RNA-binding protein 19	RBM19	Probable RNA-binding protein 19 OS=Homo sapiens OX=9606 GN=RBM19 PE=1 SV=3		5384700	6178900	0	0	5781800	0	184
P51398	28S ribosomal protein S29, mitochondrial	DAP3	28S ribosomal protein S29, mitochondrial OS=Homo sapiens OX=9606 GN=DAP3 PE=1 SV=1		0	11337000	0	0	5668500	0	185
P31946	14-3-3 protein beta/alpha;14-3-3 protein beta/alpha, N-terminally processed	YWHAB	14-3-3 protein beta/alpha OS=Homo sapiens OX=9606 GN=YWHAB PE=1 SV=3		10996000	0	0	0	5498000	0	186
Q96T88	E3 ubiquitin-protein ligase UHRF1	UHRF1	E3 ubiquitin-protein ligase UHRF1 OS=Homo sapiens OX=9606 GN=UHRF1 PE=1 SV=1		0	10792000	0	0	5396000	0	187
P08559	Pyruvate dehydrogenase E1 component subunit alpha, somatic form, mitochondrial	PDHA1	Pyruvate dehydrogenase E1 component subunit alpha, somatic form, mitochondrial OS=Homo sapiens OX=9606 GN=PDHA1 PE=1 SV=3		0	10636000	0	0	5318000	0	188
O76031	ATP-dependent Clp protease ATP-binding subunit clpX-like, mitochondrial	CLPX	ATP-dependent Clp protease ATP-binding subunit clpX-like, mitochondrial OS=Homo sapiens OX=9606 GN=CLPX PE=1 SV=2		0	10533000	0	0	5266500	0	189
P25685	DnaJ homolog subfamily B member 1	DNAJB1	DnaJ homolog subfamily B member 1 OS=Homo sapiens OX=9606 GN=DNAJB1 PE=1 SV=4		10456000	0	0	0	5228000	0	190
Q9NRC8	NAD-dependent protein deacetylase sirtuin-7	SIRT7	NAD-dependent protein deacetylase sirtuin-7 OS=Homo sapiens OX=9606 GN=SIRT7 PE=1 SV=1		4931500	5186600	0	0	5059050	0	191
Q8N428	Polypeptide N-acetylgalactosaminyltransferase 16	GALNT16	Polypeptide N-acetylgalactosaminyltransferase 16 OS=Homo sapiens OX=9606 GN=GALNT16 PE=1 SV=2		0	10031000	0	0	5015500	0	192
Q92879	CUGBP Elav-like family member 1	CELF1	CUGBP Elav-like family member 1 OS=Homo sapiens OX=9606 GN=CELF1 PE=1 SV=2		0	10002000	0	0	5001000	0	193
Q13614	Myotubularin-related protein 2	MTMR2	Myotubularin-related protein 2 OS=Homo sapiens OX=9606 GN=MTMR2 PE=1 SV=4		9869900	0	0	0	4934950	0	194
Q9HAC8;Q8WUN7	Ubiquitin domain-containing protein 1;Ubiquitin domain-containing protein 2	UBTD1;UBTD2	Ubiquitin domain-containing protein 1 OS=Homo sapiens OX=9606 GN=UBTD1 PE=1 SV=1;Ubiquitin domain-containing protein 2 OS=Homo sapiens OX=9606 GN=UBTD2 PE=1 SV=2		0	9765300	0	0	4882650	0	195
O43615	Mitochondrial import inner membrane translocase subunit TIM44	TIMM44	Mitochondrial import inner membrane translocase subunit TIM44 OS=Homo sapiens OX=9606 GN=TIMM44 PE=1 SV=2		9580400	0	0	0	4790200	0	196
Q8IY37	Probable ATP-dependent RNA helicase DHX37	DHX37	Probable ATP-dependent RNA helicase DHX37 OS=Homo sapiens OX=9606 GN=DHX37 PE=1 SV=1		0	9531500	0	0	4765750	0	197
Q9GZU3	Transmembrane protein 39B	TMEM39B	Transmembrane protein 39B OS=Homo sapiens OX=9606 GN=TMEM39B PE=1 SV=1		0	9354900	0	0	4677450	0	198
Q86U42	Polyadenylate-binding protein 2	PABPN1	Polyadenylate-binding protein 2 OS=Homo sapiens OX=9606 GN=PABPN1 PE=1 SV=3		9323800	0	0	0	4661900	0	199
P00491	Purine nucleoside phosphorylase	PNP	Purine nucleoside phosphorylase OS=Homo sapiens OX=9606 GN=PNP PE=1 SV=2		0	8920100	0	0	4460050	0	200
Q9BW92	Threonine--tRNA ligase, mitochondrial	TARS2	Threonine--tRNA ligase, mitochondrial OS=Homo sapiens OX=9606 GN=TARS2 PE=1 SV=1		8891600	0	0	0	4445800	0	201
O60930	Ribonuclease H1	RNASEH1	Ribonuclease H1 OS=Homo sapiens OX=9606 GN=RNASEH1 PE=1 SV=2		8779700	0	0	0	4389850	0	202
O60884	DnaJ homolog subfamily A member 2	DNAJA2	DnaJ homolog subfamily A member 2 OS=Homo sapiens OX=9606 GN=DNAJA2 PE=1 SV=1		0	8728300	0	0	4364150	0	203
P55809	Succinyl-CoA:3-ketoacid coenzyme A transferase 1, mitochondrial	OXCT1	Succinyl-CoA:3-ketoacid coenzyme A transferase 1, mitochondrial OS=Homo sapiens OX=9606 GN=OXCT1 PE=1 SV=1		0	8589900	0	0	4294950	0	204
P52735	Guanine nucleotide exchange factor VAV2	VAV2	Guanine nucleotide exchange factor VAV2 OS=Homo sapiens OX=9606 GN=VAV2 PE=1 SV=2		8444100	0	0	0	4222050	0	205
Q96H55	Unconventional myosin-XIX	MYO19	Unconventional myosin-XIX OS=Homo sapiens OX=9606 GN=MYO19 PE=1 SV=2		8375100	0	0	0	4187550	0	206
Q13084	39S ribosomal protein L28, mitochondrial	MRPL28	39S ribosomal protein L28, mitochondrial OS=Homo sapiens OX=9606 GN=MRPL28 PE=1 SV=4		8349300	0	0	0	4174650	0	207
Q14240	Eukaryotic initiation factor 4A-II;Eukaryotic initiation factor 4A-II, N-terminally processed	EIF4A2	Eukaryotic initiation factor 4A-II OS=Homo sapiens OX=9606 GN=EIF4A2 PE=1 SV=2		0	8169100	0	0	4084550	0	208
Q02241	Kinesin-like protein KIF23	KIF23	Kinesin-like protein KIF23 OS=Homo sapiens OX=9606 GN=KIF23 PE=1 SV=3		7695400	0	0	0	3847700	0	209
Q8IXZ2	Zinc finger CCCH domain-containing protein 3	ZC3H3	Zinc finger CCCH domain-containing protein 3 OS=Homo sapiens OX=9606 GN=ZC3H3 PE=1 SV=3		0	7536700	0	0	3768350	0	210
Q9BSD7	Cancer-related nucleoside-triphosphatase	NTPCR	Cancer-related nucleoside-triphosphatase OS=Homo sapiens OX=9606 GN=NTPCR PE=1 SV=1		7441000	0	0	0	3720500	0	211
P45877	Peptidyl-prolyl cis-trans isomerase C	PPIC	Peptidyl-prolyl cis-trans isomerase C OS=Homo sapiens OX=9606 GN=PPIC PE=1 SV=1		7345500	0	0	0	3672750	0	212
Q9NXU5	ADP-ribosylation factor-like protein 15	ARL15	ADP-ribosylation factor-like protein 15 OS=Homo sapiens OX=9606 GN=ARL15 PE=1 SV=1		0	7338700	0	0	3669350	0	213
Q8WX93;Q86TC9	Palladin	PALLD	Palladin OS=Homo sapiens OX=9606 GN=PALLD PE=1 SV=3		0	7258500	0	0	3629250	0	214
O43402	ER membrane protein complex subunit 8	EMC8	ER membrane protein complex subunit 8 OS=Homo sapiens OX=9606 GN=EMC8 PE=1 SV=1		7235800	0	0	0	3617900	0	215
O15239	NADH dehydrogenase [ubiquinone] 1 alpha subcomplex subunit 1	NDUFA1	NADH dehydrogenase [ubiquinone] 1 alpha subcomplex subunit 1 OS=Homo sapiens OX=9606 GN=NDUFA1 PE=1 SV=1		7184100	0	0	0	3592050	0	216
P13995	Bifunctional methylenetetrahydrofolate dehydrogenase/cyclohydrolase, mitochondrial;NAD-dependent methylenetetrahydrofolate dehydrogenase;Methenyltetrahydrofolate cyclohydrolase	MTHFD2	Bifunctional methylenetetrahydrofolate dehydrogenase/cyclohydrolase, mitochondrial OS=Homo sapiens OX=9606 GN=MTHFD2 PE=1 SV=2		7161300	0	0	0	3580650	0	217
Q9NPF5	DNA methyltransferase 1-associated protein 1	DMAP1	DNA methyltransferase 1-associated protein 1 OS=Homo sapiens OX=9606 GN=DMAP1 PE=1 SV=1		0	7049500	0	0	3524750	0	218
Q8N5G0	Small integral membrane protein 20	SMIM20	Small integral membrane protein 20 OS=Homo sapiens OX=9606 GN=SMIM20 PE=1 SV=3		0	6742600	0	0	3371300	0	219
Q14146	Unhealthy ribosome biogenesis protein 2 homolog	URB2	Unhealthy ribosome biogenesis protein 2 homolog OS=Homo sapiens OX=9606 GN=URB2 PE=1 SV=2		6593300	0	0	0	3296650	0	220
Q53HL2	Borealin	CDCA8	Borealin OS=Homo sapiens OX=9606 GN=CDCA8 PE=1 SV=2		6373100	0	0	0	3186550	0	221
O15243	Leptin receptor gene-related protein	LEPROT	Leptin receptor gene-related protein OS=Homo sapiens OX=9606 GN=LEPROT PE=1 SV=1		6265700	0	0	0	3132850	0	222
Q08257	Quinone oxidoreductase	CRYZ	Quinone oxidoreductase OS=Homo sapiens OX=9606 GN=CRYZ PE=1 SV=1		0	6238500	0	0	3119250	0	223
O14972	Down syndrome critical region protein 3	DSCR3	Vacuolar protein sorting-associated protein 26C OS=Homo sapiens OX=9606 GN=VPS26C PE=1 SV=1		6002000	0	0	0	3001000	0	224
Q15393	Splicing factor 3B subunit 3	SF3B3	Splicing factor 3B subunit 3 OS=Homo sapiens OX=9606 GN=SF3B3 PE=1 SV=4		0	5940600	0	0	2970300	0	225
Q86VU5	Catechol O-methyltransferase domain-containing protein 1	COMTD1	Catechol O-methyltransferase domain-containing protein 1 OS=Homo sapiens OX=9606 GN=COMTD1 PE=1 SV=1		5666500	0	0	0	2833250	0	226
Q86WX3	Active regulator of SIRT1	RPS19BP1	Active regulator of SIRT1 OS=Homo sapiens OX=9606 GN=RPS19BP1 PE=1 SV=1		5544900	0	0	0	2772450	0	227
Q9UBS4	DnaJ homolog subfamily B member 11	DNAJB11	DnaJ homolog subfamily B member 11 OS=Homo sapiens OX=9606 GN=DNAJB11 PE=1 SV=1		0	5473900	0	0	2736950	0	228
Q8N5L8	Ribonuclease P protein subunit p25-like protein	RPP25L	Ribonuclease P protein subunit p25-like protein OS=Homo sapiens OX=9606 GN=RPP25L PE=1 SV=1		0	5432300	0	0	2716150	0	229
O43242	26S proteasome non-ATPase regulatory subunit 3	PSMD3	26S proteasome non-ATPase regulatory subunit 3 OS=Homo sapiens OX=9606 GN=PSMD3 PE=1 SV=2		0	5357800	0	0	2678900	0	230
Q16527	Cysteine and glycine-rich protein 2	CSRP2	Cysteine and glycine-rich protein 2 OS=Homo sapiens OX=9606 GN=CSRP2 PE=1 SV=3		0	5296800	0	0	2648400	0	231
REV__Q8IX94;REV__Q86UF2;REV__P0CG41;REV__A4FU28;REV__A4D2H0;REV__Q96PC5			cTAGE family member 4 OS=Homo sapiens OX=9606 GN=CTAGE4 PE=2 SV=3;cTAGE family member 6 OS=Homo sapiens OX=9606 GN=CTAGE6 PE=2 SV=2;cTAGE family member 8 OS=Homo sapiens OX=9606 GN=CTAGE8 PE=3 SV=1;cTAGE family member 9 OS=Homo sapiens OX=9606 GN=CTAGE9 PE		0	5263700	0	0	2631850	0	232
P31040	Succinate dehydrogenase [ubiquinone] flavoprotein subunit, mitochondrial	SDHA	Succinate dehydrogenase [ubiquinone] flavoprotein subunit, mitochondrial OS=Homo sapiens OX=9606 GN=SDHA PE=1 SV=2		0	5091400	0	0	2545700	0	233
O75431	Metaxin-2	MTX2	Metaxin-2 OS=Homo sapiens OX=9606 GN=MTX2 PE=1 SV=1		5076100	0	0	0	2538050	0	234
Q9UKS6	Protein kinase C and casein kinase substrate in neurons protein 3	PACSIN3	Protein kinase C and casein kinase substrate in neurons protein 3 OS=Homo sapiens OX=9606 GN=PACSIN3 PE=1 SV=2		4987700	0	0	0	2493850	0	235
Q9NWD8	Transmembrane protein 248	TMEM248	Transmembrane protein 248 OS=Homo sapiens OX=9606 GN=TMEM248 PE=1 SV=1		0	4967600	0	0	2483800	0	236
O43293	Death-associated protein kinase 3	DAPK3	Death-associated protein kinase 3 OS=Homo sapiens OX=9606 GN=DAPK3 PE=1 SV=1		0	4606400	0	0	2303200	0	237
Q9Y2S7	Polymerase delta-interacting protein 2	POLDIP2	Polymerase delta-interacting protein 2 OS=Homo sapiens OX=9606 GN=POLDIP2 PE=1 SV=1		0	3727900	0	0	1863950	0	238
Q8N8Q9	Magnesium transporter NIPA2	NIPA2	Magnesium transporter NIPA2 OS=Homo sapiens OX=9606 GN=NIPA2 PE=2 SV=1		0	3271100	0	0	1635550	0	239
P13804	Electron transfer flavoprotein subunit alpha, mitochondrial	ETFA	Electron transfer flavoprotein subunit alpha, mitochondrial OS=Homo sapiens OX=9606 GN=ETFA PE=1 SV=1		0	3143600	0	0	1571800	0	240
O95239;Q2VIQ3	Chromosome-associated kinesin KIF4A;Chromosome-associated kinesin KIF4B	KIF4A;KIF4B	Chromosome-associated kinesin KIF4A OS=Homo sapiens OX=9606 GN=KIF4A PE=1 SV=3;Chromosome-associated kinesin KIF4B OS=Homo sapiens OX=9606 GN=KIF4B PE=2 SV=2		3012100	0	0	0	1506050	0	241
P04181	Ornithine aminotransferase, mitochondrial;Ornithine aminotransferase, hepatic form;Ornithine aminotransferase, renal form	OAT	Ornithine aminotransferase, mitochondrial OS=Homo sapiens OX=9606 GN=OAT PE=1 SV=1		0	2799700	0	0	1399850	0	242
Q9H444	Charged multivesicular body protein 4b	CHMP4B	Charged multivesicular body protein 4b OS=Homo sapiens OX=9606 GN=CHMP4B PE=1 SV=1		0	1806400	0	0	903200	0	243
Q9H6A9	Pecanex-like protein 3	PCNXL3	Pecanex-like protein 3 OS=Homo sapiens OX=9606 GN=PCNX3 PE=1 SV=2		1574600	0	0	0	787300	0	244
Q8N5G2	Macoilin	TMEM57	Macoilin OS=Homo sapiens OX=9606 GN=MACO1 PE=1 SV=1		1338900	0	0	0	669450	0	245
Q32NB8	CDP-diacylglycerol--glycerol-3-phosphate 3-phosphatidyltransferase, mitochondrial	PGS1	CDP-diacylglycerol--glycerol-3-phosphate 3-phosphatidyltransferase, mitochondrial OS=Homo sapiens OX=9606 GN=PGS1 PE=2 SV=1		0	642390	0	0	321195	0	246
Q9NP50	Protein FAM60A	FAM60A	SIN3-HDAC complex-associated factor OS=Homo sapiens OX=9606 GN=SINHCAF PE=1 SV=1		556990	0	0	0	278495	0	247
A2NJV5;A0A0A0MRZ7;A0A075B6S2;A0A075B6S6;A0A075B6P5;A0A0C4DH68;A0A075B6R9;A0A087WW87;P06310;P01615;P01614		IGKV A18;IGKV2D-26;IGKV2D-29	Immunoglobulin kappa variable 2-29 OS=Homo sapiens OX=9606 GN=IGKV2-29 PE=3 SV=2;Immunoglobulin kappa variable 2D-26 OS=Homo sapiens OX=9606 GN=IGKV2D-26 PE=3 SV=1;Immunoglobulin kappa variable 2D-29 OS=Homo sapiens OX=9606 GN=IGKV2D-29 PE=3 SV=1		0	0	0	0	0	0	248
A0JLT2	Mediator of RNA polymerase II transcription subunit 19	MED19	Mediator of RNA polymerase II transcription subunit 19 OS=Homo sapiens OX=9606 GN=MED19 PE=1 SV=2		0	0	0	0	0	0	249
A0PK00	Transmembrane protein 120B	TMEM120B	Transmembrane protein 120B OS=Homo sapiens OX=9606 GN=TMEM120B PE=1 SV=1		0	0	0	0	0	0	250
A2RUS2	DENN domain-containing protein 3	DENND3	DENN domain-containing protein 3 OS=Homo sapiens OX=9606 GN=DENND3 PE=1 SV=2		0	0	0	0	0	0	251
A4D1E9	GTP-binding protein 10	GTPBP10	GTP-binding protein 10 OS=Homo sapiens OX=9606 GN=GTPBP10 PE=1 SV=1		0	0	0	0	0	0	252
A5PLL7	Transmembrane protein 189	TMEM189	Transmembrane protein 189 OS=Homo sapiens OX=9606 GN=TMEM189 PE=1 SV=3		0	0	0	0	0	0	253
A5YKK6	CCR4-NOT transcription complex subunit 1	CNOT1	CCR4-NOT transcription complex subunit 1 OS=Homo sapiens OX=9606 GN=CNOT1 PE=1 SV=2		0	0	0	0	0	0	254
A6NCE7;Q9GZQ8;Q9H492	Microtubule-associated proteins 1A/1B light chain 3 beta 2;Microtubule-associated proteins 1A/1B light chain 3B;Microtubule-associated proteins 1A/1B light chain 3A	MAP1LC3B2;MAP1LC3B;MAP1LC3A	Microtubule-associated proteins 1A/1B light chain 3 beta 2 OS=Homo sapiens OX=9606 GN=MAP1LC3B2 PE=2 SV=1;Microtubule-associated proteins 1A/1B light chain 3B OS=Homo sapiens OX=9606 GN=MAP1LC3B PE=1 SV=3;Microtubule-associated proteins 1A/1B light chain 3		0	0	0	0	0	0	255
A6NKF1	SAC3 domain-containing protein 1	SAC3D1	SAC3 domain-containing protein 1 OS=Homo sapiens OX=9606 GN=SAC3D1 PE=1 SV=2		0	0	0	0	0	0	256
A6NKT7;Q7Z3J3;Q99666;O14715;P0DJD0;P0DJD1	RanBP2-like and GRIP domain-containing protein 3;RanBP2-like and GRIP domain-containing protein 4;RANBP2-like and GRIP domain-containing protein 5/6;RANBP2-like and GRIP domain-containing protein 8;RANBP2-like and GRIP domain-containing protein 1;RANBP2-like and GRIP domain-containing protein 2	RGPD3;RGPD4;RGPD5;RGPD8;RGPD1;RGPD2	RanBP2-like and GRIP domain-containing protein 3 OS=Homo sapiens OX=9606 GN=RGPD3 PE=3 SV=2;RanBP2-like and GRIP domain-containing protein 4 OS=Homo sapiens OX=9606 GN=RGPD4 PE=2 SV=3;RANBP2-like and GRIP domain-containing protein 5/6 OS=Homo sapiens OX=96		0	0	0	0	0	0	257
A6ZKI3	Protein FAM127A	FAM127A	Retrotransposon Gag-like protein 8C OS=Homo sapiens OX=9606 GN=RTL8C PE=1 SV=1		0	0	0	0	0	0	258
P62308;A8MWD9	Small nuclear ribonucleoprotein G;Putative small nuclear ribonucleoprotein G-like protein 15	SNRPG;SNRPGP15	Small nuclear ribonucleoprotein G OS=Homo sapiens OX=9606 GN=SNRPG PE=1 SV=1;Putative small nuclear ribonucleoprotein G-like protein 15 OS=Homo sapiens OX=9606 GN=SNRPGP15 PE=5 SV=2		0	0	0	0	0	0	259
B0YJ81	Very-long-chain (3R)-3-hydroxyacyl-CoA dehydratase 1	HACD1	Very-long-chain (3R)-3-hydroxyacyl-CoA dehydratase 1 OS=Homo sapiens OX=9606 GN=HACD1 PE=1 SV=1		0	0	0	0	0	0	260
C9JRZ8	Aldo-keto reductase family 1 member B15	AKR1B15	Aldo-keto reductase family 1 member B15 OS=Homo sapiens OX=9606 GN=AKR1B15 PE=1 SV=2		0	0	0	0	0	0	261
L0R8F8		SMCR7L	MIEF1 upstream open reading frame protein OS=Homo sapiens OX=9606 GN=MIEF1 PE=1 SV=1		0	0	0	0	0	0	262
O00124	UBX domain-containing protein 8	UBXN8	UBX domain-containing protein 8 OS=Homo sapiens OX=9606 GN=UBXN8 PE=1 SV=2		0	0	0	0	0	0	263
O00139	Kinesin-like protein KIF2A	KIF2A	Kinesin-like protein KIF2A OS=Homo sapiens OX=9606 GN=KIF2A PE=1 SV=3		0	0	0	0	0	0	264
O00180	Potassium channel subfamily K member 1	KCNK1	Potassium channel subfamily K member 1 OS=Homo sapiens OX=9606 GN=KCNK1 PE=1 SV=1		0	0	0	0	0	0	265
O00194	Ras-related protein Rab-27B	RAB27B	Ras-related protein Rab-27B OS=Homo sapiens OX=9606 GN=RAB27B PE=1 SV=4		0	0	0	0	0	0	266
O00203	AP-3 complex subunit beta-1	AP3B1	AP-3 complex subunit beta-1 OS=Homo sapiens OX=9606 GN=AP3B1 PE=1 SV=3		0	0	0	0	0	0	267
O00212	Rho-related GTP-binding protein RhoD	RHOD	Rho-related GTP-binding protein RhoD OS=Homo sapiens OX=9606 GN=RHOD PE=1 SV=2		0	0	0	0	0	0	268
O00220	Tumor necrosis factor receptor superfamily member 10A	TNFRSF10A	Tumor necrosis factor receptor superfamily member 10A OS=Homo sapiens OX=9606 GN=TNFRSF10A PE=1 SV=3		0	0	0	0	0	0	269
O00231	26S proteasome non-ATPase regulatory subunit 11	PSMD11	26S proteasome non-ATPase regulatory subunit 11 OS=Homo sapiens OX=9606 GN=PSMD11 PE=1 SV=3		0	0	0	0	0	0	270
O00232	26S proteasome non-ATPase regulatory subunit 12	PSMD12	26S proteasome non-ATPase regulatory subunit 12 OS=Homo sapiens OX=9606 GN=PSMD12 PE=1 SV=3		0	0	0	0	0	0	271
O00303	Eukaryotic translation initiation factor 3 subunit F	EIF3F	Eukaryotic translation initiation factor 3 subunit F OS=Homo sapiens OX=9606 GN=EIF3F PE=1 SV=1		0	0	0	0	0	0	272
O00400	Acetyl-coenzyme A transporter 1	SLC33A1	Acetyl-coenzyme A transporter 1 OS=Homo sapiens OX=9606 GN=SLC33A1 PE=1 SV=1		0	0	0	0	0	0	273
O00410;O60518	Importin-5	IPO5	Importin-5 OS=Homo sapiens OX=9606 GN=IPO5 PE=1 SV=4		0	0	0	0	0	0	274
O00411	DNA-directed RNA polymerase, mitochondrial	POLRMT	DNA-directed RNA polymerase, mitochondrial OS=Homo sapiens OX=9606 GN=POLRMT PE=1 SV=2		0	0	0	0	0	0	275
O00422	Histone deacetylase complex subunit SAP18	SAP18	Histone deacetylase complex subunit SAP18 OS=Homo sapiens OX=9606 GN=SAP18 PE=1 SV=1		0	0	0	0	0	0	276
O00429	Dynamin-1-like protein	DNM1L	Dynamin-1-like protein OS=Homo sapiens OX=9606 GN=DNM1L PE=1 SV=2		0	0	0	0	0	0	277
O00442	RNA 3-terminal phosphate cyclase	RTCA	RNA 3-terminal phosphate cyclase OS=Homo sapiens OX=9606 GN=RTCA PE=1 SV=1		0	0	0	0	0	0	278
O00458	Interferon-related developmental regulator 1	IFRD1	Interferon-related developmental regulator 1 OS=Homo sapiens OX=9606 GN=IFRD1 PE=1 SV=4		0	0	0	0	0	0	279
O00468	Agrin;Agrin N-terminal 110 kDa subunit;Agrin C-terminal 110 kDa subunit;Agrin C-terminal 90 kDa fragment;Agrin C-terminal 22 kDa fragment	AGRN	Agrin OS=Homo sapiens OX=9606 GN=AGRN PE=1 SV=6		0	0	0	0	0	0	280
O00487	26S proteasome non-ATPase regulatory subunit 14	PSMD14	26S proteasome non-ATPase regulatory subunit 14 OS=Homo sapiens OX=9606 GN=PSMD14 PE=1 SV=1		0	0	0	0	0	0	281
O00629;O00505	Importin subunit alpha-3;Importin subunit alpha-4	KPNA4;KPNA3	Importin subunit alpha-3 OS=Homo sapiens OX=9606 GN=KPNA4 PE=1 SV=1;Importin subunit alpha-4 OS=Homo sapiens OX=9606 GN=KPNA3 PE=1 SV=2		0	0	0	0	0	0	282
O00623	Peroxisome assembly protein 12	PEX12	Peroxisome assembly protein 12 OS=Homo sapiens OX=9606 GN=PEX12 PE=1 SV=1		0	0	0	0	0	0	283
O00712	Nuclear factor 1 B-type	NFIB	Nuclear factor 1 B-type OS=Homo sapiens OX=9606 GN=NFIB PE=1 SV=2		0	0	0	0	0	0	284
O14495	Lipid phosphate phosphohydrolase 3	PPAP2B	Phospholipid phosphatase 3 OS=Homo sapiens OX=9606 GN=PLPP3 PE=1 SV=1		0	0	0	0	0	0	285
O14497	AT-rich interactive domain-containing protein 1A	ARID1A	AT-rich interactive domain-containing protein 1A OS=Homo sapiens OX=9606 GN=ARID1A PE=1 SV=3		0	0	0	0	0	0	286
O14523	C2 domain-containing protein 2-like	C2CD2L	Phospholipid transfer protein C2CD2L OS=Homo sapiens OX=9606 GN=C2CD2L PE=1 SV=3		0	0	0	0	0	0	287
O14524	Transmembrane protein 194A	TMEM194A	Nuclear envelope integral membrane protein 1 OS=Homo sapiens OX=9606 GN=NEMP1 PE=1 SV=2		0	0	0	0	0	0	288
O14579	Coatomer subunit epsilon	COPE	Coatomer subunit epsilon OS=Homo sapiens OX=9606 GN=COPE PE=1 SV=3		0	0	0	0	0	0	289
O14647	Chromodomain-helicase-DNA-binding protein 2	CHD2	Chromodomain-helicase-DNA-binding protein 2 OS=Homo sapiens OX=9606 GN=CHD2 PE=1 SV=2		0	0	0	0	0	0	290
O14668	Transmembrane gamma-carboxyglutamic acid protein 1	PRRG1	Transmembrane gamma-carboxyglutamic acid protein 1 OS=Homo sapiens OX=9606 GN=PRRG1 PE=1 SV=1		0	0	0	0	0	0	291
O14681	Etoposide-induced protein 2.4 homolog	EI24	Etoposide-induced protein 2.4 homolog OS=Homo sapiens OX=9606 GN=EI24 PE=1 SV=4		0	0	0	0	0	0	292
O14684	Prostaglandin E synthase	PTGES	Prostaglandin E synthase OS=Homo sapiens OX=9606 GN=PTGES PE=1 SV=2		0	0	0	0	0	0	293
O14737	Programmed cell death protein 5	PDCD5	Programmed cell death protein 5 OS=Homo sapiens OX=9606 GN=PDCD5 PE=1 SV=3		0	0	0	0	0	0	294
O14744	Protein arginine N-methyltransferase 5;Protein arginine N-methyltransferase 5, N-terminally processed	PRMT5	Protein arginine N-methyltransferase 5 OS=Homo sapiens OX=9606 GN=PRMT5 PE=1 SV=4		0	0	0	0	0	0	295
O14757	Serine/threonine-protein kinase Chk1	CHEK1	Serine/threonine-protein kinase Chk1 OS=Homo sapiens OX=9606 GN=CHEK1 PE=1 SV=2		0	0	0	0	0	0	296
O14763	Tumor necrosis factor receptor superfamily member 10B	TNFRSF10B	Tumor necrosis factor receptor superfamily member 10B OS=Homo sapiens OX=9606 GN=TNFRSF10B PE=1 SV=2		0	0	0	0	0	0	297
O14777	Kinetochore protein NDC80 homolog	NDC80	Kinetochore protein NDC80 homolog OS=Homo sapiens OX=9606 GN=NDC80 PE=1 SV=1		0	0	0	0	0	0	298
O14802	DNA-directed RNA polymerase III subunit RPC1	POLR3A	DNA-directed RNA polymerase III subunit RPC1 OS=Homo sapiens OX=9606 GN=POLR3A PE=1 SV=2		0	0	0	0	0	0	299
O14807	Ras-related protein M-Ras	MRAS	Ras-related protein M-Ras OS=Homo sapiens OX=9606 GN=MRAS PE=1 SV=2		0	0	0	0	0	0	300
O14817	Tetraspanin-4	TSPAN4	Tetraspanin-4 OS=Homo sapiens OX=9606 GN=TSPAN4 PE=1 SV=1		0	0	0	0	0	0	301
O14874	[3-methyl-2-oxobutanoate dehydrogenase [lipoamide]] kinase, mitochondrial	BCKDK	[3-methyl-2-oxobutanoate dehydrogenase [lipoamide]] kinase, mitochondrial OS=Homo sapiens OX=9606 GN=BCKDK PE=1 SV=2		0	0	0	0	0	0	302
O14929	Histone acetyltransferase type B catalytic subunit	HAT1	Histone acetyltransferase type B catalytic subunit OS=Homo sapiens OX=9606 GN=HAT1 PE=1 SV=1		0	0	0	0	0	0	303
O14957	Cytochrome b-c1 complex subunit 10	UQCR11	Cytochrome b-c1 complex subunit 10 OS=Homo sapiens OX=9606 GN=UQCR11 PE=1 SV=1		0	0	0	0	0	0	304
O14976	Cyclin-G-associated kinase	GAK	Cyclin-G-associated kinase OS=Homo sapiens OX=9606 GN=GAK PE=1 SV=2		0	0	0	0	0	0	305
O14979	Heterogeneous nuclear ribonucleoprotein D-like	HNRNPDL	Heterogeneous nuclear ribonucleoprotein D-like OS=Homo sapiens OX=9606 GN=HNRNPDL PE=1 SV=3		0	0	0	0	0	0	306
O14981	TATA-binding protein-associated factor 172	BTAF1	TATA-binding protein-associated factor 172 OS=Homo sapiens OX=9606 GN=BTAF1 PE=1 SV=2		0	0	0	0	0	0	307
O14986;Q99755;O60331	Phosphatidylinositol 4-phosphate 5-kinase type-1 beta;Phosphatidylinositol 4-phosphate 5-kinase type-1 alpha;Phosphatidylinositol 4-phosphate 5-kinase type-1 gamma	PIP5K1B;PIP5K1A;PIP5K1C	Phosphatidylinositol 4-phosphate 5-kinase type-1 beta OS=Homo sapiens OX=9606 GN=PIP5K1B PE=1 SV=2;Phosphatidylinositol 4-phosphate 5-kinase type-1 alpha OS=Homo sapiens OX=9606 GN=PIP5K1A PE=1 SV=1;Phosphatidylinositol 4-phosphate 5-kinase type-1 gamma OS		0	0	0	0	0	0	308
O15027	Protein transport protein Sec16A	SEC16A	Protein transport protein Sec16A OS=Homo sapiens OX=9606 GN=SEC16A PE=1 SV=4		0	0	0	0	0	0	309
O15031	Plexin-B2	PLXNB2	Plexin-B2 OS=Homo sapiens OX=9606 GN=PLXNB2 PE=1 SV=3		0	0	0	0	0	0	310
O15056	Synaptojanin-2	SYNJ2	Synaptojanin-2 OS=Homo sapiens OX=9606 GN=SYNJ2 PE=1 SV=3		0	0	0	0	0	0	311
O15091	Mitochondrial ribonuclease P protein 3	KIAA0391	Mitochondrial ribonuclease P catalytic subunit OS=Homo sapiens OX=9606 GN=PRORP PE=1 SV=2		0	0	0	0	0	0	312
O15294	UDP-N-acetylglucosamine--peptide N-acetylglucosaminyltransferase 110 kDa subunit	OGT	UDP-N-acetylglucosamine--peptide N-acetylglucosaminyltransferase 110 kDa subunit OS=Homo sapiens OX=9606 GN=OGT PE=1 SV=3		0	0	0	0	0	0	313
O15344	E3 ubiquitin-protein ligase Midline-1	MID1	E3 ubiquitin-protein ligase Midline-1 OS=Homo sapiens OX=9606 GN=MID1 PE=1 SV=1		0	0	0	0	0	0	314
O15357	Phosphatidylinositol 3,4,5-trisphosphate 5-phosphatase 2	INPPL1	Phosphatidylinositol 3,4,5-trisphosphate 5-phosphatase 2 OS=Homo sapiens OX=9606 GN=INPPL1 PE=1 SV=2		0	0	0	0	0	0	315
O15372	Eukaryotic translation initiation factor 3 subunit H	EIF3H	Eukaryotic translation initiation factor 3 subunit H OS=Homo sapiens OX=9606 GN=EIF3H PE=1 SV=1		0	0	0	0	0	0	316
O15391	Transcription factor YY2	YY2	Transcription factor YY2 OS=Homo sapiens OX=9606 GN=YY2 PE=2 SV=1		0	0	0	0	0	0	317
O15431	High affinity copper uptake protein 1	SLC31A1	High affinity copper uptake protein 1 OS=Homo sapiens OX=9606 GN=SLC31A1 PE=1 SV=1		0	0	0	0	0	0	318
O15439	Multidrug resistance-associated protein 4	ABCC4	Multidrug resistance-associated protein 4 OS=Homo sapiens OX=9606 GN=ABCC4 PE=1 SV=3		0	0	0	0	0	0	319
O15554	Intermediate conductance calcium-activated potassium channel protein 4	KCNN4	Intermediate conductance calcium-activated potassium channel protein 4 OS=Homo sapiens OX=9606 GN=KCNN4 PE=1 SV=1		0	0	0	0	0	0	320
O43148	mRNA cap guanine-N7 methyltransferase	RNMT	mRNA cap guanine-N7 methyltransferase OS=Homo sapiens OX=9606 GN=RNMT PE=1 SV=1		0	0	0	0	0	0	321
O43156	TELO2-interacting protein 1 homolog	TTI1	TELO2-interacting protein 1 homolog OS=Homo sapiens OX=9606 GN=TTI1 PE=1 SV=3		0	0	0	0	0	0	322
O43172	U4/U6 small nuclear ribonucleoprotein Prp4	PRPF4	U4/U6 small nuclear ribonucleoprotein Prp4 OS=Homo sapiens OX=9606 GN=PRPF4 PE=1 SV=2		0	0	0	0	0	0	323
O43184	Disintegrin and metalloproteinase domain-containing protein 12	ADAM12	Disintegrin and metalloproteinase domain-containing protein 12 OS=Homo sapiens OX=9606 GN=ADAM12 PE=1 SV=3		0	0	0	0	0	0	324
O43237	Cytoplasmic dynein 1 light intermediate chain 2	DYNC1LI2	Cytoplasmic dynein 1 light intermediate chain 2 OS=Homo sapiens OX=9606 GN=DYNC1LI2 PE=1 SV=1		0	0	0	0	0	0	325
O43264	Centromere/kinetochore protein zw10 homolog	ZW10	Centromere/kinetochore protein zw10 homolog OS=Homo sapiens OX=9606 GN=ZW10 PE=1 SV=3		0	0	0	0	0	0	326
O43286	Beta-1,4-galactosyltransferase 5	B4GALT5	Beta-1,4-galactosyltransferase 5 OS=Homo sapiens OX=9606 GN=B4GALT5 PE=1 SV=1		0	0	0	0	0	0	327
O43399	Tumor protein D54	TPD52L2	Tumor protein D54 OS=Homo sapiens OX=9606 GN=TPD52L2 PE=1 SV=2		0	0	0	0	0	0	328
O43432	Eukaryotic translation initiation factor 4 gamma 3	EIF4G3	Eukaryotic translation initiation factor 4 gamma 3 OS=Homo sapiens OX=9606 GN=EIF4G3 PE=1 SV=2		0	0	0	0	0	0	329
O43447	Peptidyl-prolyl cis-trans isomerase H	PPIH	Peptidyl-prolyl cis-trans isomerase H OS=Homo sapiens OX=9606 GN=PPIH PE=1 SV=1		0	0	0	0	0	0	330
O43462	Membrane-bound transcription factor site-2 protease	MBTPS2	Membrane-bound transcription factor site-2 protease OS=Homo sapiens OX=9606 GN=MBTPS2 PE=1 SV=1		0	0	0	0	0	0	331
Q8NHP1;O43488	Aflatoxin B1 aldehyde reductase member 4;Aflatoxin B1 aldehyde reductase member 2	AKR7L;AKR7A2	Aflatoxin B1 aldehyde reductase member 4 OS=Homo sapiens OX=9606 GN=AKR7L PE=2 SV=7;Aflatoxin B1 aldehyde reductase member 2 OS=Homo sapiens OX=9606 GN=AKR7A2 PE=1 SV=3		0	0	0	0	0	0	332
O43505	Beta-1,4-glucuronyltransferase 1	B4GAT1	Beta-1,4-glucuronyltransferase 1 OS=Homo sapiens OX=9606 GN=B4GAT1 PE=1 SV=1		0	0	0	0	0	0	333
O43653	Prostate stem cell antigen	PSCA	Prostate stem cell antigen OS=Homo sapiens OX=9606 GN=PSCA PE=1 SV=2		0	0	0	0	0	0	334
O43660	Pleiotropic regulator 1	PLRG1	Pleiotropic regulator 1 OS=Homo sapiens OX=9606 GN=PLRG1 PE=1 SV=1		0	0	0	0	0	0	335
O43688	Lipid phosphate phosphohydrolase 2	PPAP2C	Phospholipid phosphatase 2 OS=Homo sapiens OX=9606 GN=PLPP2 PE=1 SV=1		0	0	0	0	0	0	336
O43731	ER lumen protein-retaining receptor 3	KDELR3	ER lumen protein-retaining receptor 3 OS=Homo sapiens OX=9606 GN=KDELR3 PE=2 SV=1		0	0	0	0	0	0	337
O43776	Asparagine--tRNA ligase, cytoplasmic	NARS	Asparagine--tRNA ligase, cytoplasmic OS=Homo sapiens OX=9606 GN=NARS1 PE=1 SV=1		0	0	0	0	0	0	338
O43813	LanC-like protein 1	LANCL1	Glutathione S-transferase LANCL1 OS=Homo sapiens OX=9606 GN=LANCL1 PE=1 SV=1		0	0	0	0	0	0	339
O43837	Isocitrate dehydrogenase [NAD] subunit beta, mitochondrial	IDH3B	Isocitrate dehydrogenase [NAD] subunit beta, mitochondrial OS=Homo sapiens OX=9606 GN=IDH3B PE=1 SV=2		0	0	0	0	0	0	340
O43865;Q96HN2	Putative adenosylhomocysteinase 2;Putative adenosylhomocysteinase 3	AHCYL1;AHCYL2	S-adenosylhomocysteine hydrolase-like protein 1 OS=Homo sapiens OX=9606 GN=AHCYL1 PE=1 SV=2;Adenosylhomocysteinase 3 OS=Homo sapiens OX=9606 GN=AHCYL2 PE=1 SV=1		0	0	0	0	0	0	341
O43913	Origin recognition complex subunit 5	ORC5	Origin recognition complex subunit 5 OS=Homo sapiens OX=9606 GN=ORC5 PE=1 SV=1		0	0	0	0	0	0	342
O60216;Q9H4I0	Double-strand-break repair protein rad21 homolog	RAD21	Double-strand-break repair protein rad21 homolog OS=Homo sapiens OX=9606 GN=RAD21 PE=1 SV=2		0	0	0	0	0	0	343
O60231	Putative pre-mRNA-splicing factor ATP-dependent RNA helicase DHX16	DHX16	Pre-mRNA-splicing factor ATP-dependent RNA helicase DHX16 OS=Homo sapiens OX=9606 GN=DHX16 PE=1 SV=2		0	0	0	0	0	0	344
O60238	BCL2/adenovirus E1B 19 kDa protein-interacting protein 3-like	BNIP3L	BCL2/adenovirus E1B 19 kDa protein-interacting protein 3-like OS=Homo sapiens OX=9606 GN=BNIP3L PE=1 SV=1		0	0	0	0	0	0	345
O60244	Mediator of RNA polymerase II transcription subunit 14	MED14	Mediator of RNA polymerase II transcription subunit 14 OS=Homo sapiens OX=9606 GN=MED14 PE=1 SV=2		0	0	0	0	0	0	346
O60256	Phosphoribosyl pyrophosphate synthase-associated protein 2	PRPSAP2	Phosphoribosyl pyrophosphate synthase-associated protein 2 OS=Homo sapiens OX=9606 GN=PRPSAP2 PE=1 SV=1		0	0	0	0	0	0	347
O60266	Adenylate cyclase type 3	ADCY3	Adenylate cyclase type 3 OS=Homo sapiens OX=9606 GN=ADCY3 PE=1 SV=3		0	0	0	0	0	0	348
O60294	tRNA wybutosine-synthesizing protein 4	LCMT2	tRNA wybutosine-synthesizing protein 4 OS=Homo sapiens OX=9606 GN=LCMT2 PE=1 SV=3		0	0	0	0	0	0	349
O60306	Intron-binding protein aquarius	AQR	RNA helicase aquarius OS=Homo sapiens OX=9606 GN=AQR PE=1 SV=4		0	0	0	0	0	0	350
O60313	Dynamin-like 120 kDa protein, mitochondrial;Dynamin-like 120 kDa protein, form S1	OPA1	Dynamin-like 120 kDa protein, mitochondrial OS=Homo sapiens OX=9606 GN=OPA1 PE=1 SV=3		0	0	0	0	0	0	351
O60337	E3 ubiquitin-protein ligase MARCH6	2022-03-06	E3 ubiquitin-protein ligase MARCH6 OS=Homo sapiens OX=9606 GN=MARCH6 PE=1 SV=2		0	0	0	0	0	0	352
O60341	Lysine-specific histone demethylase 1A	KDM1A	Lysine-specific histone demethylase 1A OS=Homo sapiens OX=9606 GN=KDM1A PE=1 SV=2		0	0	0	0	0	0	353
O60462	Neuropilin-2	NRP2	Neuropilin-2 OS=Homo sapiens OX=9606 GN=NRP2 PE=1 SV=3		0	0	0	0	0	0	354
O60476	Mannosyl-oligosaccharide 1,2-alpha-mannosidase IB	MAN1A2	Mannosyl-oligosaccharide 1,2-alpha-mannosidase IB OS=Homo sapiens OX=9606 GN=MAN1A2 PE=1 SV=1		0	0	0	0	0	0	355
O60503	Adenylate cyclase type 9	ADCY9	Adenylate cyclase type 9 OS=Homo sapiens OX=9606 GN=ADCY9 PE=1 SV=4		0	0	0	0	0	0	356
O60508	Pre-mRNA-processing factor 17	CDC40	Pre-mRNA-processing factor 17 OS=Homo sapiens OX=9606 GN=CDC40 PE=1 SV=1		0	0	0	0	0	0	357
O60513	Beta-1,4-galactosyltransferase 4;N-acetyllactosamine synthase;Lactotriaosylceramide beta-1,4-galactosyltransferase	B4GALT4	Beta-1,4-galactosyltransferase 4 OS=Homo sapiens OX=9606 GN=B4GALT4 PE=1 SV=1		0	0	0	0	0	0	358
O60583	Cyclin-T2	CCNT2	Cyclin-T2 OS=Homo sapiens OX=9606 GN=CCNT2 PE=1 SV=2		0	0	0	0	0	0	359
O60610	Protein diaphanous homolog 1	DIAPH1	Protein diaphanous homolog 1 OS=Homo sapiens OX=9606 GN=DIAPH1 PE=1 SV=2		0	0	0	0	0	0	360
O60637	Tetraspanin-3	TSPAN3	Tetraspanin-3 OS=Homo sapiens OX=9606 GN=TSPAN3 PE=2 SV=1		0	0	0	0	0	0	361
O60645	Exocyst complex component 3	EXOC3	Exocyst complex component 3 OS=Homo sapiens OX=9606 GN=EXOC3 PE=1 SV=3		0	0	0	0	0	0	362
O60669	Monocarboxylate transporter 2	SLC16A7	Monocarboxylate transporter 2 OS=Homo sapiens OX=9606 GN=SLC16A7 PE=1 SV=2		0	0	0	0	0	0	363
O60683	Peroxisome biogenesis factor 10	PEX10	Peroxisome biogenesis factor 10 OS=Homo sapiens OX=9606 GN=PEX10 PE=1 SV=1		0	0	0	0	0	0	364
O60779	Thiamine transporter 1	SLC19A2	Thiamine transporter 1 OS=Homo sapiens OX=9606 GN=SLC19A2 PE=1 SV=2		0	0	0	0	0	0	365
O60828	Polyglutamine-binding protein 1	PQBP1	Polyglutamine-binding protein 1 OS=Homo sapiens OX=9606 GN=PQBP1 PE=1 SV=1		0	0	0	0	0	0	366
O60870	DNA/RNA-binding protein KIN17	KIN	DNA/RNA-binding protein KIN17 OS=Homo sapiens OX=9606 GN=KIN PE=1 SV=2		0	0	0	0	0	0	367
O60885	Bromodomain-containing protein 4	BRD4	Bromodomain-containing protein 4 OS=Homo sapiens OX=9606 GN=BRD4 PE=1 SV=2		0	0	0	0	0	0	368
O75027	ATP-binding cassette sub-family B member 7, mitochondrial	ABCB7	ATP-binding cassette sub-family B member 7, mitochondrial OS=Homo sapiens OX=9606 GN=ABCB7 PE=1 SV=2		0	0	0	0	0	0	369
P0DMP2;P0DJJ0;O75044;Q7Z6B7	SLIT-ROBO Rho GTPase-activating protein 2B;SLIT-ROBO Rho GTPase-activating protein 2C;SLIT-ROBO Rho GTPase-activating protein 2;SLIT-ROBO Rho GTPase-activating protein 1	SRGAP2B;SRGAP2C;SRGAP2;SRGAP1	SLIT-ROBO Rho GTPase-activating protein 2B OS=Homo sapiens OX=9606 GN=SRGAP2B PE=3 SV=1;SLIT-ROBO Rho GTPase-activating protein 2C OS=Homo sapiens OX=9606 GN=SRGAP2C PE=1 SV=1;SLIT-ROBO Rho GTPase-activating protein 2 OS=Homo sapiens OX=9606 GN=SRGAP2 PE=1		0	0	0	0	0	0	370
O75054	Immunoglobulin superfamily member 3	IGSF3	Immunoglobulin superfamily member 3 OS=Homo sapiens OX=9606 GN=IGSF3 PE=2 SV=3		0	0	0	0	0	0	371
O75083	WD repeat-containing protein 1	WDR1	WD repeat-containing protein 1 OS=Homo sapiens OX=9606 GN=WDR1 PE=1 SV=4		0	0	0	0	0	0	372
O75116;Q13464	Rho-associated protein kinase 2	ROCK2	Rho-associated protein kinase 2 OS=Homo sapiens OX=9606 GN=ROCK2 PE=1 SV=4		0	0	0	0	0	0	373
O75122	CLIP-associating protein 2	CLASP2	CLIP-associating protein 2 OS=Homo sapiens OX=9606 GN=CLASP2 PE=1 SV=3		0	0	0	0	0	0	374
O75131	Copine-3	CPNE3	Copine-3 OS=Homo sapiens OX=9606 GN=CPNE3 PE=1 SV=1		0	0	0	0	0	0	375
O75152	Zinc finger CCCH domain-containing protein 11A	ZC3H11A	Zinc finger CCCH domain-containing protein 11A OS=Homo sapiens OX=9606 GN=ZC3H11A PE=1 SV=3		0	0	0	0	0	0	376
O75153	Clustered mitochondria protein homolog	CLUH	Clustered mitochondria protein homolog OS=Homo sapiens OX=9606 GN=CLUH PE=1 SV=2		0	0	0	0	0	0	377
O75175	CCR4-NOT transcription complex subunit 3	CNOT3	CCR4-NOT transcription complex subunit 3 OS=Homo sapiens OX=9606 GN=CNOT3 PE=1 SV=1		0	0	0	0	0	0	378
O75379	Vesicle-associated membrane protein 4	VAMP4	Vesicle-associated membrane protein 4 OS=Homo sapiens OX=9606 GN=VAMP4 PE=1 SV=2		0	0	0	0	0	0	379
O75438	NADH dehydrogenase [ubiquinone] 1 beta subcomplex subunit 1	NDUFB1	NADH dehydrogenase [ubiquinone] 1 beta subcomplex subunit 1 OS=Homo sapiens OX=9606 GN=NDUFB1 PE=1 SV=1		0	0	0	0	0	0	380
O75446	Histone deacetylase complex subunit SAP30	SAP30	Histone deacetylase complex subunit SAP30 OS=Homo sapiens OX=9606 GN=SAP30 PE=1 SV=1		0	0	0	0	0	0	381
O75448	Mediator of RNA polymerase II transcription subunit 24	MED24	Mediator of RNA polymerase II transcription subunit 24 OS=Homo sapiens OX=9606 GN=MED24 PE=1 SV=1		0	0	0	0	0	0	382
O75462	Cytokine receptor-like factor 1	CRLF1	Cytokine receptor-like factor 1 OS=Homo sapiens OX=9606 GN=CRLF1 PE=1 SV=1		0	0	0	0	0	0	383
O75489	NADH dehydrogenase [ubiquinone] iron-sulfur protein 3, mitochondrial	NDUFS3	NADH dehydrogenase [ubiquinone] iron-sulfur protein 3, mitochondrial OS=Homo sapiens OX=9606 GN=NDUFS3 PE=1 SV=1		0	0	0	0	0	0	384
O75569	Interferon-inducible double-stranded RNA-dependent protein kinase activator A	PRKRA	Interferon-inducible double-stranded RNA-dependent protein kinase activator A OS=Homo sapiens OX=9606 GN=PRKRA PE=1 SV=1		0	0	0	0	0	0	385
O75607	Nucleoplasmin-3	NPM3	Nucleoplasmin-3 OS=Homo sapiens OX=9606 GN=NPM3 PE=1 SV=3		0	0	0	0	0	0	386
O75608	Acyl-protein thioesterase 1	LYPLA1	Acyl-protein thioesterase 1 OS=Homo sapiens OX=9606 GN=LYPLA1 PE=1 SV=1		0	0	0	0	0	0	387
O75616	GTPase Era, mitochondrial	ERAL1	GTPase Era, mitochondrial OS=Homo sapiens OX=9606 GN=ERAL1 PE=1 SV=2		0	0	0	0	0	0	388
O75818	Ribonuclease P protein subunit p40	RPP40	Ribonuclease P protein subunit p40 OS=Homo sapiens OX=9606 GN=RPP40 PE=1 SV=3		0	0	0	0	0	0	389
O75822	Eukaryotic translation initiation factor 3 subunit J	EIF3J	Eukaryotic translation initiation factor 3 subunit J OS=Homo sapiens OX=9606 GN=EIF3J PE=1 SV=2		0	0	0	0	0	0	390
O75845	Lathosterol oxidase	SC5D	Lathosterol oxidase OS=Homo sapiens OX=9606 GN=SC5D PE=1 SV=2		0	0	0	0	0	0	391
O75907	Diacylglycerol O-acyltransferase 1	DGAT1	Diacylglycerol O-acyltransferase 1 OS=Homo sapiens OX=9606 GN=DGAT1 PE=1 SV=2		0	0	0	0	0	0	392
O75962	Triple functional domain protein	TRIO	Triple functional domain protein OS=Homo sapiens OX=9606 GN=TRIO PE=1 SV=2		0	0	0	0	0	0	393
O76024	Wolframin	WFS1	Wolframin OS=Homo sapiens OX=9606 GN=WFS1 PE=1 SV=2		0	0	0	0	0	0	394
O76082	Solute carrier family 22 member 5	SLC22A5	Solute carrier family 22 member 5 OS=Homo sapiens OX=9606 GN=SLC22A5 PE=1 SV=1		0	0	0	0	0	0	395
O76095	Protein JTB	JTB	Protein JTB OS=Homo sapiens OX=9606 GN=JTB PE=1 SV=1		0	0	0	0	0	0	396
O94762	ATP-dependent DNA helicase Q5	RECQL5	ATP-dependent DNA helicase Q5 OS=Homo sapiens OX=9606 GN=RECQL5 PE=1 SV=2		0	0	0	0	0	0	397
O94806	Serine/threonine-protein kinase D3	PRKD3	Serine/threonine-protein kinase D3 OS=Homo sapiens OX=9606 GN=PRKD3 PE=1 SV=1		0	0	0	0	0	0	398
O94822	E3 ubiquitin-protein ligase listerin	LTN1	E3 ubiquitin-protein ligase listerin OS=Homo sapiens OX=9606 GN=LTN1 PE=1 SV=6		0	0	0	0	0	0	399
O94855	Protein transport protein Sec24D	SEC24D	Protein transport protein Sec24D OS=Homo sapiens OX=9606 GN=SEC24D PE=1 SV=2		0	0	0	0	0	0	400
O94874	E3 UFM1-protein ligase 1	UFL1	E3 UFM1-protein ligase 1 OS=Homo sapiens OX=9606 GN=UFL1 PE=1 SV=2		0	0	0	0	0	0	401
O94876	Transmembrane and coiled-coil domains protein 1	TMCC1	Transmembrane and coiled-coil domains protein 1 OS=Homo sapiens OX=9606 GN=TMCC1 PE=1 SV=3		0	0	0	0	0	0	402
O94905	Erlin-2	ERLIN2	Erlin-2 OS=Homo sapiens OX=9606 GN=ERLIN2 PE=1 SV=1		0	0	0	0	0	0	403
O94927	HAUS augmin-like complex subunit 5	HAUS5	HAUS augmin-like complex subunit 5 OS=Homo sapiens OX=9606 GN=HAUS5 PE=1 SV=2		0	0	0	0	0	0	404
O94979	Protein transport protein Sec31A	SEC31A	Protein transport protein Sec31A OS=Homo sapiens OX=9606 GN=SEC31A PE=1 SV=3		0	0	0	0	0	0	405
O95059	Ribonuclease P protein subunit p14	RPP14	Ribonuclease P protein subunit p14 OS=Homo sapiens OX=9606 GN=RPP14 PE=1 SV=3		0	0	0	0	0	0	406
O95067	G2/mitotic-specific cyclin-B2	CCNB2	G2/mitotic-specific cyclin-B2 OS=Homo sapiens OX=9606 GN=CCNB2 PE=1 SV=1		0	0	0	0	0	0	407
O95140	Mitofusin-2	MFN2	Mitofusin-2 OS=Homo sapiens OX=9606 GN=MFN2 PE=1 SV=3		0	0	0	0	0	0	408
O95147	Dual specificity protein phosphatase 14	DUSP14	Dual specificity protein phosphatase 14 OS=Homo sapiens OX=9606 GN=DUSP14 PE=1 SV=1		0	0	0	0	0	0	409
O95163	Elongator complex protein 1	IKBKAP	Elongator complex protein 1 OS=Homo sapiens OX=9606 GN=ELP1 PE=1 SV=3		0	0	0	0	0	0	410
O95218	Zinc finger Ran-binding domain-containing protein 2	ZRANB2	Zinc finger Ran-binding domain-containing protein 2 OS=Homo sapiens OX=9606 GN=ZRANB2 PE=1 SV=2		0	0	0	0	0	0	411
O95235	Kinesin-like protein KIF20A	KIF20A	Kinesin-like protein KIF20A OS=Homo sapiens OX=9606 GN=KIF20A PE=1 SV=1		0	0	0	0	0	0	412
O95243	Methyl-CpG-binding domain protein 4	MBD4	Methyl-CpG-binding domain protein 4 OS=Homo sapiens OX=9606 GN=MBD4 PE=1 SV=1		0	0	0	0	0	0	413
O95248	Myotubularin-related protein 5	SBF1	Myotubularin-related protein 5 OS=Homo sapiens OX=9606 GN=SBF1 PE=1 SV=4		0	0	0	0	0	0	414
O95251;Q9H7Z6;Q8WYB5	Histone acetyltransferase KAT7	KAT7	Histone acetyltransferase KAT7 OS=Homo sapiens OX=9606 GN=KAT7 PE=1 SV=1		0	0	0	0	0	0	415
O95298	NADH dehydrogenase [ubiquinone] 1 subunit C2	NDUFC2	NADH dehydrogenase [ubiquinone] 1 subunit C2 OS=Homo sapiens OX=9606 GN=NDUFC2 PE=1 SV=1		0	0	0	0	0	0	416
O95415	Brain protein I3	BRI3	Brain protein I3 OS=Homo sapiens OX=9606 GN=BRI3 PE=1 SV=1		0	0	0	0	0	0	417
O95427	GPI ethanolamine phosphate transferase 1	PIGN	GPI ethanolamine phosphate transferase 1 OS=Homo sapiens OX=9606 GN=PIGN PE=1 SV=1		0	0	0	0	0	0	418
O95433	Activator of 90 kDa heat shock protein ATPase homolog 1	AHSA1	Activator of 90 kDa heat shock protein ATPase homolog 1 OS=Homo sapiens OX=9606 GN=AHSA1 PE=1 SV=1		0	0	0	0	0	0	419
O95456	Proteasome assembly chaperone 1	PSMG1	Proteasome assembly chaperone 1 OS=Homo sapiens OX=9606 GN=PSMG1 PE=1 SV=1		0	0	0	0	0	0	420
O95562	Vesicle transport protein SFT2B	SFT2D2	Vesicle transport protein SFT2B OS=Homo sapiens OX=9606 GN=SFT2D2 PE=1 SV=1		0	0	0	0	0	0	421
O95639	Cleavage and polyadenylation specificity factor subunit 4	CPSF4	Cleavage and polyadenylation specificity factor subunit 4 OS=Homo sapiens OX=9606 GN=CPSF4 PE=1 SV=1		0	0	0	0	0	0	422
O95707	Ribonuclease P protein subunit p29	POP4	Ribonuclease P protein subunit p29 OS=Homo sapiens OX=9606 GN=POP4 PE=1 SV=2		0	0	0	0	0	0	423
O95714	E3 ubiquitin-protein ligase HERC2	HERC2	E3 ubiquitin-protein ligase HERC2 OS=Homo sapiens OX=9606 GN=HERC2 PE=1 SV=2		0	0	0	0	0	0	424
O95716;P20337	Ras-related protein Rab-3D	RAB3D	Ras-related protein Rab-3D OS=Homo sapiens OX=9606 GN=RAB3D PE=1 SV=1		0	0	0	0	0	0	425
O95721	Synaptosomal-associated protein 29	SNAP29	Synaptosomal-associated protein 29 OS=Homo sapiens OX=9606 GN=SNAP29 PE=1 SV=1		0	0	0	0	0	0	426
O95747	Serine/threonine-protein kinase OSR1	OXSR1	Serine/threonine-protein kinase OSR1 OS=Homo sapiens OX=9606 GN=OXSR1 PE=1 SV=1		0	0	0	0	0	0	427
O95758	Polypyrimidine tract-binding protein 3	PTBP3	Polypyrimidine tract-binding protein 3 OS=Homo sapiens OX=9606 GN=PTBP3 PE=1 SV=2		0	0	0	0	0	0	428
O95772	MLN64 N-terminal domain homolog	STARD3NL	STARD3 N-terminal-like protein OS=Homo sapiens OX=9606 GN=STARD3NL PE=1 SV=1		0	0	0	0	0	0	429
O95786	Probable ATP-dependent RNA helicase DDX58	DDX58	Antiviral innate immune response receptor RIG-I OS=Homo sapiens OX=9606 GN=DDX58 PE=1 SV=2		0	0	0	0	0	0	430
O95816	BAG family molecular chaperone regulator 2	BAG2	BAG family molecular chaperone regulator 2 OS=Homo sapiens OX=9606 GN=BAG2 PE=1 SV=1		0	0	0	0	0	0	431
O95857	Tetraspanin-13	TSPAN13	Tetraspanin-13 OS=Homo sapiens OX=9606 GN=TSPAN13 PE=2 SV=1		0	0	0	0	0	0	432
O95905	Protein SGT1	ECD	Protein ecdysoneless homolog OS=Homo sapiens OX=9606 GN=ECD PE=1 SV=1		0	0	0	0	0	0	433
O95985;Q13472	DNA topoisomerase 3-beta-1;DNA topoisomerase 3-alpha	TOP3B;TOP3A	DNA topoisomerase 3-beta-1 OS=Homo sapiens OX=9606 GN=TOP3B PE=1 SV=1;DNA topoisomerase 3-alpha OS=Homo sapiens OX=9606 GN=TOP3A PE=1 SV=1		0	0	0	0	0	0	434
O96019	Actin-like protein 6A	ACTL6A	Actin-like protein 6A OS=Homo sapiens OX=9606 GN=ACTL6A PE=1 SV=1		0	0	0	0	0	0	435
P00395	Cytochrome c oxidase subunit 1	MT-CO1	Cytochrome c oxidase subunit 1 OS=Homo sapiens OX=9606 GN=MT-CO1 PE=1 SV=1		0	0	0	0	0	0	436
P00441	Superoxide dismutase [Cu-Zn]	SOD1	Superoxide dismutase [Cu-Zn] OS=Homo sapiens OX=9606 GN=SOD1 PE=1 SV=2		0	0	0	0	0	0	437
P00492	Hypoxanthine-guanine phosphoribosyltransferase	HPRT1	Hypoxanthine-guanine phosphoribosyltransferase OS=Homo sapiens OX=9606 GN=HPRT1 PE=1 SV=2		0	0	0	0	0	0	438
P00846	ATP synthase subunit a	MT-ATP6	ATP synthase subunit a OS=Homo sapiens OX=9606 GN=MT-ATP6 PE=1 SV=1		0	0	0	0	0	0	439
P00973	2-5-oligoadenylate synthase 1	OAS1	2-5-oligoadenylate synthase 1 OS=Homo sapiens OX=9606 GN=OAS1 PE=1 SV=4		0	0	0	0	0	0	440
P02794	Ferritin heavy chain;Ferritin heavy chain, N-terminally processed	FTH1	Ferritin heavy chain OS=Homo sapiens OX=9606 GN=FTH1 PE=1 SV=2		0	0	0	0	0	0	441
P03886	NADH-ubiquinone oxidoreductase chain 1	MT-ND1	NADH-ubiquinone oxidoreductase chain 1 OS=Homo sapiens OX=9606 GN=MT-ND1 PE=1 SV=1		0	0	0	0	0	0	442
P03897	NADH-ubiquinone oxidoreductase chain 3	MT-ND3	NADH-ubiquinone oxidoreductase chain 3 OS=Homo sapiens OX=9606 GN=MT-ND3 PE=1 SV=1		0	0	0	0	0	0	443
P04150	Glucocorticoid receptor	NR3C1	Glucocorticoid receptor OS=Homo sapiens OX=9606 GN=NR3C1 PE=1 SV=1		0	0	0	0	0	0	444
P04156	Major prion protein	PRNP	Major prion protein OS=Homo sapiens OX=9606 GN=PRNP PE=1 SV=1		0	0	0	0	0	0	445
P04183	Thymidine kinase, cytosolic	TK1	Thymidine kinase, cytosolic OS=Homo sapiens OX=9606 GN=TK1 PE=1 SV=2		0	0	0	0	0	0	446
P04233	HLA class II histocompatibility antigen gamma chain	CD74	HLA class II histocompatibility antigen gamma chain OS=Homo sapiens OX=9606 GN=CD74 PE=1 SV=3		0	0	0	0	0	0	447
P04350	Tubulin beta-4A chain	TUBB4A	Tubulin beta-4A chain OS=Homo sapiens OX=9606 GN=TUBB4A PE=1 SV=2		0	0	0	0	0	0	448
P05108	Cholesterol side-chain cleavage enzyme, mitochondrial	CYP11A1	Cholesterol side-chain cleavage enzyme, mitochondrial OS=Homo sapiens OX=9606 GN=CYP11A1 PE=1 SV=2		0	0	0	0	0	0	449
P05455	Lupus La protein	SSB	Lupus La protein OS=Homo sapiens OX=9606 GN=SSB PE=1 SV=2		0	0	0	0	0	0	450
P06703	Protein S100-A6	S100A6	Protein S100-A6 OS=Homo sapiens OX=9606 GN=S100A6 PE=1 SV=1		0	0	0	0	0	0	451
P07196	Neurofilament light polypeptide	NEFL	Neurofilament light polypeptide OS=Homo sapiens OX=9606 GN=NEFL PE=1 SV=3		0	0	0	0	0	0	452
P07384	Calpain-1 catalytic subunit	CAPN1	Calpain-1 catalytic subunit OS=Homo sapiens OX=9606 GN=CAPN1 PE=1 SV=1		0	0	0	0	0	0	453
P07948;P08631	Tyrosine-protein kinase Lyn	LYN	Tyrosine-protein kinase Lyn OS=Homo sapiens OX=9606 GN=LYN PE=1 SV=3		0	0	0	0	0	0	454
P08069;P06213	Insulin-like growth factor 1 receptor;Insulin-like growth factor 1 receptor alpha chain;Insulin-like growth factor 1 receptor beta chain	IGF1R	Insulin-like growth factor 1 receptor OS=Homo sapiens OX=9606 GN=IGF1R PE=1 SV=1		0	0	0	0	0	0	455
P08133	Annexin A6	ANXA6	Annexin A6 OS=Homo sapiens OX=9606 GN=ANXA6 PE=1 SV=3		0	0	0	0	0	0	456
P08134	Rho-related GTP-binding protein RhoC	RHOC	Rho-related GTP-binding protein RhoC OS=Homo sapiens OX=9606 GN=RHOC PE=1 SV=1		0	0	0	0	0	0	457
P08183;P21439	Multidrug resistance protein 1;Multidrug resistance protein 3	ABCB1;ABCB4	ATP-dependent translocase ABCB1 OS=Homo sapiens OX=9606 GN=ABCB1 PE=1 SV=3;Phosphatidylcholine translocator ABCB4 OS=Homo sapiens OX=9606 GN=ABCB4 PE=1 SV=2		0	0	0	0	0	0	458
P08237	ATP-dependent 6-phosphofructokinase, muscle type	PFKM	ATP-dependent 6-phosphofructokinase, muscle type OS=Homo sapiens OX=9606 GN=PFKM PE=1 SV=2		0	0	0	0	0	0	459
P08651	Nuclear factor 1 C-type	NFIC	Nuclear factor 1 C-type OS=Homo sapiens OX=9606 GN=NFIC PE=1 SV=2		0	0	0	0	0	0	460
P09104	Gamma-enolase	ENO2	Gamma-enolase OS=Homo sapiens OX=9606 GN=ENO2 PE=1 SV=3		0	0	0	0	0	0	461
P09234	U1 small nuclear ribonucleoprotein C	SNRPC	U1 small nuclear ribonucleoprotein C OS=Homo sapiens OX=9606 GN=SNRPC PE=1 SV=1		0	0	0	0	0	0	462
Q03013;P09488	Glutathione S-transferase Mu 4;Glutathione S-transferase Mu 1	GSTM4;GSTM1	Glutathione S-transferase Mu 4 OS=Homo sapiens OX=9606 GN=GSTM4 PE=1 SV=3;Glutathione S-transferase Mu 1 OS=Homo sapiens OX=9606 GN=GSTM1 PE=1 SV=3		0	0	0	0	0	0	463
P09884	DNA polymerase alpha catalytic subunit	POLA1	DNA polymerase alpha catalytic subunit OS=Homo sapiens OX=9606 GN=POLA1 PE=1 SV=2		0	0	0	0	0	0	464
P09914;Q5T764	Interferon-induced protein with tetratricopeptide repeats 1	IFIT1	Interferon-induced protein with tetratricopeptide repeats 1 OS=Homo sapiens OX=9606 GN=IFIT1 PE=1 SV=2		0	0	0	0	0	0	465
P0DME0;Q01105	Protein SETSIP;Protein SET	SETSIP;SET	Protein SETSIP OS=Homo sapiens OX=9606 GN=SETSIP PE=1 SV=1;Protein SET OS=Homo sapiens OX=9606 GN=SET PE=1 SV=3		0	0	0	0	0	0	466
P0DP91;Q03468	DNA excision repair protein ERCC-6	ERCC6	Chimeric ERCC6-PGBD3 protein OS=Homo sapiens OX=9606 GN=ERCC6 PE=1 SV=1;DNA excision repair protein ERCC-6 OS=Homo sapiens OX=9606 GN=ERCC6 PE=1 SV=1		0	0	0	0	0	0	467
P10155	60 kDa SS-A/Ro ribonucleoprotein	TROVE2	60 kDa SS-A/Ro ribonucleoprotein OS=Homo sapiens OX=9606 GN=RO60 PE=1 SV=2		0	0	0	0	0	0	468
P24468;P10589	COUP transcription factor 2;COUP transcription factor 1	NR2F2;NR2F1	COUP transcription factor 2 OS=Homo sapiens OX=9606 GN=NR2F2 PE=1 SV=1;COUP transcription factor 1 OS=Homo sapiens OX=9606 GN=NR2F1 PE=1 SV=1		0	0	0	0	0	0	469
P10599	Thioredoxin	TXN	Thioredoxin OS=Homo sapiens OX=9606 GN=TXN PE=1 SV=3		0	0	0	0	0	0	470
P11177	Pyruvate dehydrogenase E1 component subunit beta, mitochondrial	PDHB	Pyruvate dehydrogenase E1 component subunit beta, mitochondrial OS=Homo sapiens OX=9606 GN=PDHB PE=1 SV=3		0	0	0	0	0	0	471
P11182	Lipoamide acyltransferase component of branched-chain alpha-keto acid dehydrogenase complex, mitochondrial	DBT	Lipoamide acyltransferase component of branched-chain alpha-keto acid dehydrogenase complex, mitochondrial OS=Homo sapiens OX=9606 GN=DBT PE=1 SV=3		0	0	0	0	0	0	472
P11474	Steroid hormone receptor ERR1	ESRRA	Steroid hormone receptor ERR1 OS=Homo sapiens OX=9606 GN=ESRRA PE=1 SV=3		0	0	0	0	0	0	473
P11532	Dystrophin	DMD	Dystrophin OS=Homo sapiens OX=9606 GN=DMD PE=1 SV=3		0	0	0	0	0	0	474
P11766	Alcohol dehydrogenase class-3	ADH5	Alcohol dehydrogenase class-3 OS=Homo sapiens OX=9606 GN=ADH5 PE=1 SV=4		0	0	0	0	0	0	475
P11908	Ribose-phosphate pyrophosphokinase 2	PRPS2	Ribose-phosphate pyrophosphokinase 2 OS=Homo sapiens OX=9606 GN=PRPS2 PE=1 SV=2		0	0	0	0	0	0	476
P12004	Proliferating cell nuclear antigen	PCNA	Proliferating cell nuclear antigen OS=Homo sapiens OX=9606 GN=PCNA PE=1 SV=1		0	0	0	0	0	0	477
P12268	Inosine-5-monophosphate dehydrogenase 2	IMPDH2	Inosine-5-monophosphate dehydrogenase 2 OS=Homo sapiens OX=9606 GN=IMPDH2 PE=1 SV=2		0	0	0	0	0	0	478
P13051	Uracil-DNA glycosylase	UNG	Uracil-DNA glycosylase OS=Homo sapiens OX=9606 GN=UNG PE=1 SV=2		0	0	0	0	0	0	479
P13473	Lysosome-associated membrane glycoprotein 2	LAMP2	Lysosome-associated membrane glycoprotein 2 OS=Homo sapiens OX=9606 GN=LAMP2 PE=1 SV=2		0	0	0	0	0	0	480
P13497;O43897;Q9Y6L7	Bone morphogenetic protein 1	BMP1	Bone morphogenetic protein 1 OS=Homo sapiens OX=9606 GN=BMP1 PE=1 SV=2		0	0	0	0	0	0	481
P13693;Q56UQ5	Translationally-controlled tumor protein	TPT1	Translationally-controlled tumor protein OS=Homo sapiens OX=9606 GN=TPT1 PE=1 SV=1		0	0	0	0	0	0	482
P13747	HLA class I histocompatibility antigen, alpha chain E	HLA-E	HLA class I histocompatibility antigen, alpha chain E OS=Homo sapiens OX=9606 GN=HLA-E PE=1 SV=4		0	0	0	0	0	0	483
P13807	Glycogen [starch] synthase, muscle	GYS1	Glycogen [starch] synthase, muscle OS=Homo sapiens OX=9606 GN=GYS1 PE=1 SV=2		0	0	0	0	0	0	484
P14174	Macrophage migration inhibitory factor	MIF	Macrophage migration inhibitory factor OS=Homo sapiens OX=9606 GN=MIF PE=1 SV=4		0	0	0	0	0	0	485
P14209	CD99 antigen	CD99	CD99 antigen OS=Homo sapiens OX=9606 GN=CD99 PE=1 SV=1		0	0	0	0	0	0	486
P14314	Glucosidase 2 subunit beta	PRKCSH	Glucosidase 2 subunit beta OS=Homo sapiens OX=9606 GN=PRKCSH PE=1 SV=2		0	0	0	0	0	0	487
P14384	Carboxypeptidase M	CPM	Carboxypeptidase M OS=Homo sapiens OX=9606 GN=CPM PE=1 SV=2		0	0	0	0	0	0	488
P14406	Cytochrome c oxidase subunit 7A2, mitochondrial	COX7A2	Cytochrome c oxidase subunit 7A2, mitochondrial OS=Homo sapiens OX=9606 GN=COX7A2 PE=1 SV=1		0	0	0	0	0	0	489
P14780	Matrix metalloproteinase-9;67 kDa matrix metalloproteinase-9;82 kDa matrix metalloproteinase-9	MMP9	Matrix metalloproteinase-9 OS=Homo sapiens OX=9606 GN=MMP9 PE=1 SV=3		0	0	0	0	0	0	490
P14854	Cytochrome c oxidase subunit 6B1	COX6B1	Cytochrome c oxidase subunit 6B1 OS=Homo sapiens OX=9606 GN=COX6B1 PE=1 SV=2		0	0	0	0	0	0	491
P15144	Aminopeptidase N	ANPEP	Aminopeptidase N OS=Homo sapiens OX=9606 GN=ANPEP PE=1 SV=4		0	0	0	0	0	0	492
P15170;Q8IYD1	Eukaryotic peptide chain release factor GTP-binding subunit ERF3A	GSPT1	Eukaryotic peptide chain release factor GTP-binding subunit ERF3A OS=Homo sapiens OX=9606 GN=GSPT1 PE=1 SV=1		0	0	0	0	0	0	493
P15260	Interferon gamma receptor 1	IFNGR1	Interferon gamma receptor 1 OS=Homo sapiens OX=9606 GN=IFNGR1 PE=1 SV=1		0	0	0	0	0	0	494
P15531	Nucleoside diphosphate kinase A	NME1	Nucleoside diphosphate kinase A OS=Homo sapiens OX=9606 GN=NME1 PE=1 SV=1		0	0	0	0	0	0	495
P15954	Cytochrome c oxidase subunit 7C, mitochondrial	COX7C	Cytochrome c oxidase subunit 7C, mitochondrial OS=Homo sapiens OX=9606 GN=COX7C PE=1 SV=1		0	0	0	0	0	0	496
P17066;P48741	Heat shock 70 kDa protein 6;Putative heat shock 70 kDa protein 7	HSPA6;HSPA7	Heat shock 70 kDa protein 6 OS=Homo sapiens OX=9606 GN=HSPA6 PE=1 SV=2;Putative heat shock 70 kDa protein 7 OS=Homo sapiens OX=9606 GN=HSPA7 PE=5 SV=2		0	0	0	0	0	0	497
P17081	Rho-related GTP-binding protein RhoQ	RHOQ	Rho-related GTP-binding protein RhoQ OS=Homo sapiens OX=9606 GN=RHOQ PE=1 SV=2		0	0	0	0	0	0	498
P17342	Atrial natriuretic peptide receptor 3	NPR3	Atrial natriuretic peptide receptor 3 OS=Homo sapiens OX=9606 GN=NPR3 PE=1 SV=2		0	0	0	0	0	0	499
P17405	Sphingomyelin phosphodiesterase	SMPD1	Sphingomyelin phosphodiesterase OS=Homo sapiens OX=9606 GN=SMPD1 PE=1 SV=5		0	0	0	0	0	0	500
P17612;P22694;P22612	cAMP-dependent protein kinase catalytic subunit alpha;cAMP-dependent protein kinase catalytic subunit beta;cAMP-dependent protein kinase catalytic subunit gamma	PRKACA;PRKACB;PRKACG	cAMP-dependent protein kinase catalytic subunit alpha OS=Homo sapiens OX=9606 GN=PRKACA PE=1 SV=2;cAMP-dependent protein kinase catalytic subunit beta OS=Homo sapiens OX=9606 GN=PRKACB PE=1 SV=2;cAMP-dependent protein kinase catalytic subunit gamma OS=Homo		0	0	0	0	0	0	501
P17655	Calpain-2 catalytic subunit	CAPN2	Calpain-2 catalytic subunit OS=Homo sapiens OX=9606 GN=CAPN2 PE=1 SV=6		0	0	0	0	0	0	502
P17693	HLA class I histocompatibility antigen, alpha chain G	HLA-G	HLA class I histocompatibility antigen, alpha chain G OS=Homo sapiens OX=9606 GN=HLA-G PE=1 SV=1		0	0	0	0	0	0	503
P17706	Tyrosine-protein phosphatase non-receptor type 2	PTPN2	Tyrosine-protein phosphatase non-receptor type 2 OS=Homo sapiens OX=9606 GN=PTPN2 PE=1 SV=2		0	0	0	0	0	0	504
P17812	CTP synthase 1	CTPS1	CTP synthase 1 OS=Homo sapiens OX=9606 GN=CTPS1 PE=1 SV=2		0	0	0	0	0	0	505
P17813	Endoglin	ENG	Endoglin OS=Homo sapiens OX=9606 GN=ENG PE=1 SV=2		0	0	0	0	0	0	506
P17858	ATP-dependent 6-phosphofructokinase, liver type	PFKL	ATP-dependent 6-phosphofructokinase, liver type OS=Homo sapiens OX=9606 GN=PFKL PE=1 SV=6		0	0	0	0	0	0	507
P17980	26S protease regulatory subunit 6A	PSMC3	26S proteasome regulatory subunit 6A OS=Homo sapiens OX=9606 GN=PSMC3 PE=1 SV=3		0	0	0	0	0	0	508
P18074	TFIIH basal transcription factor complex helicase XPD subunit	ERCC2	General transcription and DNA repair factor IIH helicase subunit XPD OS=Homo sapiens OX=9606 GN=ERCC2 PE=1 SV=1		0	0	0	0	0	0	509
P18405	3-oxo-5-alpha-steroid 4-dehydrogenase 1	SRD5A1	3-oxo-5-alpha-steroid 4-dehydrogenase 1 OS=Homo sapiens OX=9606 GN=SRD5A1 PE=1 SV=1		0	0	0	0	0	0	510
P18564	Integrin beta-6	ITGB6	Integrin beta-6 OS=Homo sapiens OX=9606 GN=ITGB6 PE=1 SV=2		0	0	0	0	0	0	511
P19021	Peptidyl-glycine alpha-amidating monooxygenase;Peptidylglycine alpha-hydroxylating monooxygenase;Peptidyl-alpha-hydroxyglycine alpha-amidating lyase	PAM	Peptidyl-glycine alpha-amidating monooxygenase OS=Homo sapiens OX=9606 GN=PAM PE=1 SV=2		0	0	0	0	0	0	512
P19438	Tumor necrosis factor receptor superfamily member 1A;Tumor necrosis factor receptor superfamily member 1A, membrane form;Tumor necrosis factor-binding protein 1	TNFRSF1A	Tumor necrosis factor receptor superfamily member 1A OS=Homo sapiens OX=9606 GN=TNFRSF1A PE=1 SV=1		0	0	0	0	0	0	513
P19447	TFIIH basal transcription factor complex helicase XPB subunit	ERCC3	General transcription and DNA repair factor IIH helicase subunit XPB OS=Homo sapiens OX=9606 GN=ERCC3 PE=1 SV=1		0	0	0	0	0	0	514
P20248	Cyclin-A2	CCNA2	Cyclin-A2 OS=Homo sapiens OX=9606 GN=CCNA2 PE=1 SV=2		0	0	0	0	0	0	515
P20336	Ras-related protein Rab-3A	RAB3A	Ras-related protein Rab-3A OS=Homo sapiens OX=9606 GN=RAB3A PE=1 SV=1		0	0	0	0	0	0	516
P20585	DNA mismatch repair protein Msh3	MSH3	DNA mismatch repair protein Msh3 OS=Homo sapiens OX=9606 GN=MSH3 PE=1 SV=4		0	0	0	0	0	0	517
P20591;P20592	Interferon-induced GTP-binding protein Mx1;Interferon-induced GTP-binding protein Mx1, N-terminally processed;Interferon-induced GTP-binding protein Mx2	MX1;MX2	Interferon-induced GTP-binding protein Mx1 OS=Homo sapiens OX=9606 GN=MX1 PE=1 SV=4;Interferon-induced GTP-binding protein Mx2 OS=Homo sapiens OX=9606 GN=MX2 PE=1 SV=1		0	0	0	0	0	0	518
P20618	Proteasome subunit beta type-1	PSMB1	Proteasome subunit beta type-1 OS=Homo sapiens OX=9606 GN=PSMB1 PE=1 SV=2		0	0	0	0	0	0	519
P21283	V-type proton ATPase subunit C 1	ATP6V1C1	V-type proton ATPase subunit C 1 OS=Homo sapiens OX=9606 GN=ATP6V1C1 PE=1 SV=4		0	0	0	0	0	0	520
P21359	Neurofibromin;Neurofibromin truncated	NF1	Neurofibromin OS=Homo sapiens OX=9606 GN=NF1 PE=1 SV=2		0	0	0	0	0	0	521
P21731	Thromboxane A2 receptor	TBXA2R	Thromboxane A2 receptor OS=Homo sapiens OX=9606 GN=TBXA2R PE=1 SV=3		0	0	0	0	0	0	522
P22059;Q969R2	Oxysterol-binding protein 1	OSBP	Oxysterol-binding protein 1 OS=Homo sapiens OX=9606 GN=OSBP PE=1 SV=1		0	0	0	0	0	0	523
P22102	Trifunctional purine biosynthetic protein adenosine-3;Phosphoribosylamine--glycine ligase;Phosphoribosylformylglycinamidine cyclo-ligase;Phosphoribosylglycinamide formyltransferase	GART	Trifunctional purine biosynthetic protein adenosine-3 OS=Homo sapiens OX=9606 GN=GART PE=1 SV=1		0	0	0	0	0	0	524
P35326;P35325;P22532;P22531;Q9BYE4;Q96RM1	Small proline-rich protein 2A;Small proline-rich protein 2B;Small proline-rich protein 2D;Small proline-rich protein 2E;Small proline-rich protein 2G;Small proline-rich protein 2F	SPRR2A;SPRR2B;SPRR2D;SPRR2E;SPRR2G;SPRR2F	Small proline-rich protein 2A OS=Homo sapiens OX=9606 GN=SPRR2A PE=1 SV=1;Small proline-rich protein 2B OS=Homo sapiens OX=9606 GN=SPRR2B PE=2 SV=1;Small proline-rich protein 2D OS=Homo sapiens OX=9606 GN=SPRR2D PE=2 SV=2;Small proline-rich protein 2E OS=H		0	0	0	0	0	0	525
P23490	Loricrin	LOR	Loricrin OS=Homo sapiens OX=9606 GN=LOR PE=1 SV=2		0	0	0	0	0	0	526
P23526	Adenosylhomocysteinase	AHCY	Adenosylhomocysteinase OS=Homo sapiens OX=9606 GN=AHCY PE=1 SV=4		0	0	0	0	0	0	527
P23588	Eukaryotic translation initiation factor 4B	EIF4B	Eukaryotic translation initiation factor 4B OS=Homo sapiens OX=9606 GN=EIF4B PE=1 SV=2		0	0	0	0	0	0	528
P23743	Diacylglycerol kinase alpha	DGKA	Diacylglycerol kinase alpha OS=Homo sapiens OX=9606 GN=DGKA PE=1 SV=3		0	0	0	0	0	0	529
P24390	ER lumen protein-retaining receptor 1	KDELR1	ER lumen protein-retaining receptor 1 OS=Homo sapiens OX=9606 GN=KDELR1 PE=1 SV=1		0	0	0	0	0	0	530
P24534	Elongation factor 1-beta	EEF1B2	Elongation factor 1-beta OS=Homo sapiens OX=9606 GN=EEF1B2 PE=1 SV=3		0	0	0	0	0	0	531
P24928	DNA-directed RNA polymerase II subunit RPB1	POLR2A	DNA-directed RNA polymerase II subunit RPB1 OS=Homo sapiens OX=9606 GN=POLR2A PE=1 SV=2		0	0	0	0	0	0	532
P25098;P35626	Beta-adrenergic receptor kinase 1;Beta-adrenergic receptor kinase 2	ADRBK1;ADRBK2	Beta-adrenergic receptor kinase 1 OS=Homo sapiens OX=9606 GN=GRK2 PE=1 SV=2;Beta-adrenergic receptor kinase 2 OS=Homo sapiens OX=9606 GN=GRK3 PE=1 SV=2		0	0	0	0	0	0	533
P25106	Atypical chemokine receptor 3	ACKR3	Atypical chemokine receptor 3 OS=Homo sapiens OX=9606 GN=ACKR3 PE=1 SV=3		0	0	0	0	0	0	534
P25490;Q96MM3	Transcriptional repressor protein YY1	YY1	Transcriptional repressor protein YY1 OS=Homo sapiens OX=9606 GN=YY1 PE=1 SV=2		0	0	0	0	0	0	535
P25786	Proteasome subunit alpha type-1	PSMA1	Proteasome subunit alpha type-1 OS=Homo sapiens OX=9606 GN=PSMA1 PE=1 SV=1		0	0	0	0	0	0	536
P25788	Proteasome subunit alpha type-3	PSMA3	Proteasome subunit alpha type-3 OS=Homo sapiens OX=9606 GN=PSMA3 PE=1 SV=2		0	0	0	0	0	0	537
P26012	Integrin beta-8	ITGB8	Integrin beta-8 OS=Homo sapiens OX=9606 GN=ITGB8 PE=1 SV=1		0	0	0	0	0	0	538
P26572	Alpha-1,3-mannosyl-glycoprotein 2-beta-N-acetylglucosaminyltransferase	MGAT1	Alpha-1,3-mannosyl-glycoprotein 2-beta-N-acetylglucosaminyltransferase OS=Homo sapiens OX=9606 GN=MGAT1 PE=1 SV=2		0	0	0	0	0	0	539
P26885	Peptidyl-prolyl cis-trans isomerase FKBP2	FKBP2	Peptidyl-prolyl cis-trans isomerase FKBP2 OS=Homo sapiens OX=9606 GN=FKBP2 PE=1 SV=2		0	0	0	0	0	0	540
P27449	V-type proton ATPase 16 kDa proteolipid subunit	ATP6V0C	V-type proton ATPase 16 kDa proteolipid subunit OS=Homo sapiens OX=9606 GN=ATP6V0C PE=1 SV=1		0	0	0	0	0	0	541
P27694	Replication protein A 70 kDa DNA-binding subunit;Replication protein A 70 kDa DNA-binding subunit, N-terminally processed	RPA1	Replication protein A 70 kDa DNA-binding subunit OS=Homo sapiens OX=9606 GN=RPA1 PE=1 SV=2		0	0	0	0	0	0	542
P27708	CAD protein;Glutamine-dependent carbamoyl-phosphate synthase;Aspartate carbamoyltransferase;Dihydroorotase	CAD	CAD protein OS=Homo sapiens OX=9606 GN=CAD PE=1 SV=3		0	0	0	0	0	0	543
P28062	Proteasome subunit beta type-8	PSMB8	Proteasome subunit beta type-8 OS=Homo sapiens OX=9606 GN=PSMB8 PE=1 SV=3		0	0	0	0	0	0	544
P28066	Proteasome subunit alpha type-5	PSMA5	Proteasome subunit alpha type-5 OS=Homo sapiens OX=9606 GN=PSMA5 PE=1 SV=3		0	0	0	0	0	0	545
P28070	Proteasome subunit beta type-4	PSMB4	Proteasome subunit beta type-4 OS=Homo sapiens OX=9606 GN=PSMB4 PE=1 SV=4		0	0	0	0	0	0	546
P28072	Proteasome subunit beta type-6	PSMB6	Proteasome subunit beta type-6 OS=Homo sapiens OX=9606 GN=PSMB6 PE=1 SV=4		0	0	0	0	0	0	547
P28340	DNA polymerase delta catalytic subunit	POLD1	DNA polymerase delta catalytic subunit OS=Homo sapiens OX=9606 GN=POLD1 PE=1 SV=2		0	0	0	0	0	0	548
P28347;Q99594;Q15561;Q15562	Transcriptional enhancer factor TEF-1;Transcriptional enhancer factor TEF-5;Transcriptional enhancer factor TEF-3;Transcriptional enhancer factor TEF-4	TEAD1;TEAD3;TEAD4;TEAD2	Transcriptional enhancer factor TEF-1 OS=Homo sapiens OX=9606 GN=TEAD1 PE=1 SV=2;Transcriptional enhancer factor TEF-5 OS=Homo sapiens OX=9606 GN=TEAD3 PE=1 SV=2;Transcriptional enhancer factor TEF-3 OS=Homo sapiens OX=9606 GN=TEAD4 PE=1 SV=3;Transcription		0	0	0	0	0	0	549
P28370	Probable global transcription activator SNF2L1	SMARCA1	Probable global transcription activator SNF2L1 OS=Homo sapiens OX=9606 GN=SMARCA1 PE=1 SV=2		0	0	0	0	0	0	550
P28482;P27361	Mitogen-activated protein kinase 1	MAPK1	Mitogen-activated protein kinase 1 OS=Homo sapiens OX=9606 GN=MAPK1 PE=1 SV=3		0	0	0	0	0	0	551
P28715	DNA repair protein complementing XP-G cells	ERCC5	DNA repair protein complementing XP-G cells OS=Homo sapiens OX=9606 GN=ERCC5 PE=1 SV=3		0	0	0	0	0	0	552
P29144	Tripeptidyl-peptidase 2	TPP2	Tripeptidyl-peptidase 2 OS=Homo sapiens OX=9606 GN=TPP2 PE=1 SV=4		0	0	0	0	0	0	553
P29372	DNA-3-methyladenine glycosylase	MPG	DNA-3-methyladenine glycosylase OS=Homo sapiens OX=9606 GN=MPG PE=1 SV=3		0	0	0	0	0	0	554
P29692	Elongation factor 1-delta	EEF1D	Elongation factor 1-delta OS=Homo sapiens OX=9606 GN=EEF1D PE=1 SV=5		0	0	0	0	0	0	555
P30048	Thioredoxin-dependent peroxide reductase, mitochondrial	PRDX3	Thioredoxin-dependent peroxide reductase, mitochondrial OS=Homo sapiens OX=9606 GN=PRDX3 PE=1 SV=3		0	0	0	0	0	0	556
P30153;P30154	Serine/threonine-protein phosphatase 2A 65 kDa regulatory subunit A alpha isoform	PPP2R1A	Serine/threonine-protein phosphatase 2A 65 kDa regulatory subunit A alpha isoform OS=Homo sapiens OX=9606 GN=PPP2R1A PE=1 SV=4		0	0	0	0	0	0	557
P30414	NK-tumor recognition protein;Putative peptidyl-prolyl cis-trans isomerase	NKTR	NK-tumor recognition protein OS=Homo sapiens OX=9606 GN=NKTR PE=1 SV=2		0	0	0	0	0	0	558
P30511	HLA class I histocompatibility antigen, alpha chain F	HLA-F	HLA class I histocompatibility antigen, alpha chain F OS=Homo sapiens OX=9606 GN=HLA-F PE=1 SV=3		0	0	0	0	0	0	559
P30837	Aldehyde dehydrogenase X, mitochondrial	ALDH1B1	Aldehyde dehydrogenase X, mitochondrial OS=Homo sapiens OX=9606 GN=ALDH1B1 PE=1 SV=3		0	0	0	0	0	0	560
P30876	DNA-directed RNA polymerase II subunit RPB2	POLR2B	DNA-directed RNA polymerase II subunit RPB2 OS=Homo sapiens OX=9606 GN=POLR2B PE=1 SV=1		0	0	0	0	0	0	561
P31350	Ribonucleoside-diphosphate reductase subunit M2	RRM2	Ribonucleoside-diphosphate reductase subunit M2 OS=Homo sapiens OX=9606 GN=RRM2 PE=1 SV=1		0	0	0	0	0	0	562
P31942	Heterogeneous nuclear ribonucleoprotein H3	HNRNPH3	Heterogeneous nuclear ribonucleoprotein H3 OS=Homo sapiens OX=9606 GN=HNRNPH3 PE=1 SV=2		0	0	0	0	0	0	563
P31947	14-3-3 protein sigma	SFN	14-3-3 protein sigma OS=Homo sapiens OX=9606 GN=SFN PE=1 SV=1		0	0	0	0	0	0	564
P31949	Protein S100-A11;Protein S100-A11, N-terminally processed	S100A11	Protein S100-A11 OS=Homo sapiens OX=9606 GN=S100A11 PE=1 SV=2		0	0	0	0	0	0	565
P32119	Peroxiredoxin-2	PRDX2	Peroxiredoxin-2 OS=Homo sapiens OX=9606 GN=PRDX2 PE=1 SV=5		0	0	0	0	0	0	566
P32322	Pyrroline-5-carboxylate reductase 1, mitochondrial	PYCR1	Pyrroline-5-carboxylate reductase 1, mitochondrial OS=Homo sapiens OX=9606 GN=PYCR1 PE=1 SV=2		0	0	0	0	0	0	567
P32780	General transcription factor IIH subunit 1	GTF2H1	General transcription factor IIH subunit 1 OS=Homo sapiens OX=9606 GN=GTF2H1 PE=1 SV=1		0	0	0	0	0	0	568
P33121	Long-chain-fatty-acid--CoA ligase 1	ACSL1	Long-chain-fatty-acid--CoA ligase 1 OS=Homo sapiens OX=9606 GN=ACSL1 PE=1 SV=1		0	0	0	0	0	0	569
P33176;O60282	Kinesin-1 heavy chain;Kinesin heavy chain isoform 5C	KIF5B;KIF5C	Kinesin-1 heavy chain OS=Homo sapiens OX=9606 GN=KIF5B PE=1 SV=1;Kinesin heavy chain isoform 5C OS=Homo sapiens OX=9606 GN=KIF5C PE=1 SV=1		0	0	0	0	0	0	570
P33981	Dual specificity protein kinase TTK	TTK	Dual specificity protein kinase TTK OS=Homo sapiens OX=9606 GN=TTK PE=1 SV=2		0	0	0	0	0	0	571
P33991	DNA replication licensing factor MCM4	MCM4	DNA replication licensing factor MCM4 OS=Homo sapiens OX=9606 GN=MCM4 PE=1 SV=5		0	0	0	0	0	0	572
P34741	Syndecan-2	SDC2	Syndecan-2 OS=Homo sapiens OX=9606 GN=SDC2 PE=1 SV=2		0	0	0	0	0	0	573
P34896	Serine hydroxymethyltransferase, cytosolic	SHMT1	Serine hydroxymethyltransferase, cytosolic OS=Homo sapiens OX=9606 GN=SHMT1 PE=1 SV=1		0	0	0	0	0	0	574
P34932;O95757;Q92598	Heat shock 70 kDa protein 4	HSPA4	Heat shock 70 kDa protein 4 OS=Homo sapiens OX=9606 GN=HSPA4 PE=1 SV=4		0	0	0	0	0	0	575
P35030	Trypsin-3	PRSS3	Trypsin-3 OS=Homo sapiens OX=9606 GN=PRSS3 PE=1 SV=2		0	0	0	0	0	0	576
P35249	Replication factor C subunit 4	RFC4	Replication factor C subunit 4 OS=Homo sapiens OX=9606 GN=RFC4 PE=1 SV=2		0	0	0	0	0	0	577
P35270;REV__Q16649	Sepiapterin reductase	SPR	Sepiapterin reductase OS=Homo sapiens OX=9606 GN=SPR PE=1 SV=1		0	0	0	0	0	0	578
P35367	Histamine H1 receptor	HRH1	Histamine H1 receptor OS=Homo sapiens OX=9606 GN=HRH1 PE=1 SV=1		0	0	0	0	0	0	579
P35555	Fibrillin-1	FBN1	Fibrillin-1 OS=Homo sapiens OX=9606 GN=FBN1 PE=1 SV=4		0	0	0	0	0	0	580
P35998	26S protease regulatory subunit 7	PSMC2	26S proteasome regulatory subunit 7 OS=Homo sapiens OX=9606 GN=PSMC2 PE=1 SV=3		0	0	0	0	0	0	581
P36406	E3 ubiquitin-protein ligase TRIM23	TRIM23	E3 ubiquitin-protein ligase TRIM23 OS=Homo sapiens OX=9606 GN=TRIM23 PE=1 SV=1		0	0	0	0	0	0	582
P36543	V-type proton ATPase subunit E 1	ATP6V1E1	V-type proton ATPase subunit E 1 OS=Homo sapiens OX=9606 GN=ATP6V1E1 PE=1 SV=1		0	0	0	0	0	0	583
P36873	Serine/threonine-protein phosphatase PP1-gamma catalytic subunit	PPP1CC	Serine/threonine-protein phosphatase PP1-gamma catalytic subunit OS=Homo sapiens OX=9606 GN=PPP1CC PE=1 SV=1		0	0	0	0	0	0	584
P36915	Guanine nucleotide-binding protein-like 1	GNL1	Guanine nucleotide-binding protein-like 1 OS=Homo sapiens OX=9606 GN=GNL1 PE=1 SV=2		0	0	0	0	0	0	585
P36952	Serpin B5	SERPINB5	Serpin B5 OS=Homo sapiens OX=9606 GN=SERPINB5 PE=1 SV=2		0	0	0	0	0	0	586
P37235;P84074;P61601	Hippocalcin-like protein 1;Neuron-specific calcium-binding protein hippocalcin	HPCAL1;HPCA	Hippocalcin-like protein 1 OS=Homo sapiens OX=9606 GN=HPCAL1 PE=1 SV=3;Neuron-specific calcium-binding protein hippocalcin OS=Homo sapiens OX=9606 GN=HPCA PE=1 SV=2		0	0	0	0	0	0	587
P37287	Phosphatidylinositol N-acetylglucosaminyltransferase subunit A	PIGA	Phosphatidylinositol N-acetylglucosaminyltransferase subunit A OS=Homo sapiens OX=9606 GN=PIGA PE=1 SV=1		0	0	0	0	0	0	588
P37837	Transaldolase	TALDO1	Transaldolase OS=Homo sapiens OX=9606 GN=TALDO1 PE=1 SV=2		0	0	0	0	0	0	589
P38935	DNA-binding protein SMUBP-2	IGHMBP2	DNA-binding protein SMUBP-2 OS=Homo sapiens OX=9606 GN=IGHMBP2 PE=1 SV=3		0	0	0	0	0	0	590
P40189	Interleukin-6 receptor subunit beta	IL6ST	Interleukin-6 receptor subunit beta OS=Homo sapiens OX=9606 GN=IL6ST PE=1 SV=2		0	0	0	0	0	0	591
P40692	DNA mismatch repair protein Mlh1	MLH1	DNA mismatch repair protein Mlh1 OS=Homo sapiens OX=9606 GN=MLH1 PE=1 SV=1		0	0	0	0	0	0	592
P40763	Signal transducer and activator of transcription 3	STAT3	Signal transducer and activator of transcription 3 OS=Homo sapiens OX=9606 GN=STAT3 PE=1 SV=2		0	0	0	0	0	0	593
P40818	Ubiquitin carboxyl-terminal hydrolase 8	USP8	Ubiquitin carboxyl-terminal hydrolase 8 OS=Homo sapiens OX=9606 GN=USP8 PE=1 SV=1		0	0	0	0	0	0	594
P40937	Replication factor C subunit 5	RFC5	Replication factor C subunit 5 OS=Homo sapiens OX=9606 GN=RFC5 PE=1 SV=1		0	0	0	0	0	0	595
P41227;Q9BSU3	N-alpha-acetyltransferase 10	NAA10	N-alpha-acetyltransferase 10 OS=Homo sapiens OX=9606 GN=NAA10 PE=1 SV=1		0	0	0	0	0	0	596
P41247	Patatin-like phospholipase domain-containing protein 4	PNPLA4	Patatin-like phospholipase domain-containing protein 4 OS=Homo sapiens OX=9606 GN=PNPLA4 PE=2 SV=3		0	0	0	0	0	0	597
P41252	Isoleucine--tRNA ligase, cytoplasmic	IARS	Isoleucine--tRNA ligase, cytoplasmic OS=Homo sapiens OX=9606 GN=IARS PE=1 SV=2		0	0	0	0	0	0	598
P41567;O60739	Eukaryotic translation initiation factor 1;Eukaryotic translation initiation factor 1b	EIF1;EIF1B	Eukaryotic translation initiation factor 1 OS=Homo sapiens OX=9606 GN=EIF1 PE=1 SV=1;Eukaryotic translation initiation factor 1b OS=Homo sapiens OX=9606 GN=EIF1B PE=1 SV=2		0	0	0	0	0	0	599
P41743	Protein kinase C iota type	PRKCI	Protein kinase C iota type OS=Homo sapiens OX=9606 GN=PRKCI PE=1 SV=2		0	0	0	0	0	0	600
P42025	Beta-centractin	ACTR1B	Beta-centractin OS=Homo sapiens OX=9606 GN=ACTR1B PE=1 SV=1		0	0	0	0	0	0	601
P42224	Signal transducer and activator of transcription 1-alpha/beta	STAT1	Signal transducer and activator of transcription 1-alpha/beta OS=Homo sapiens OX=9606 GN=STAT1 PE=1 SV=2		0	0	0	0	0	0	602
P42345	Serine/threonine-protein kinase mTOR	MTOR	Serine/threonine-protein kinase mTOR OS=Homo sapiens OX=9606 GN=MTOR PE=1 SV=1		0	0	0	0	0	0	603
P42356	Phosphatidylinositol 4-kinase alpha	PI4KA	Phosphatidylinositol 4-kinase alpha OS=Homo sapiens OX=9606 GN=PI4KA PE=1 SV=4		0	0	0	0	0	0	604
P42695	Condensin-2 complex subunit D3	NCAPD3	Condensin-2 complex subunit D3 OS=Homo sapiens OX=9606 GN=NCAPD3 PE=1 SV=2		0	0	0	0	0	0	605
P43034	Platelet-activating factor acetylhydrolase IB subunit alpha	PAFAH1B1	Platelet-activating factor acetylhydrolase IB subunit alpha OS=Homo sapiens OX=9606 GN=PAFAH1B1 PE=1 SV=2		0	0	0	0	0	0	606
P43246	DNA mismatch repair protein Msh2	MSH2	DNA mismatch repair protein Msh2 OS=Homo sapiens OX=9606 GN=MSH2 PE=1 SV=1		0	0	0	0	0	0	607
P43490	Nicotinamide phosphoribosyltransferase	NAMPT	Nicotinamide phosphoribosyltransferase OS=Homo sapiens OX=9606 GN=NAMPT PE=1 SV=1		0	0	0	0	0	0	608
P45844	ATP-binding cassette sub-family G member 1	ABCG1	ATP-binding cassette sub-family G member 1 OS=Homo sapiens OX=9606 GN=ABCG1 PE=1 SV=3		0	0	0	0	0	0	609
P46060	Ran GTPase-activating protein 1	RANGAP1	Ran GTPase-activating protein 1 OS=Homo sapiens OX=9606 GN=RANGAP1 PE=1 SV=1		0	0	0	0	0	0	610
P46734;P52564	Dual specificity mitogen-activated protein kinase kinase 3	MAP2K3	Dual specificity mitogen-activated protein kinase kinase 3 OS=Homo sapiens OX=9606 GN=MAP2K3 PE=1 SV=2		0	0	0	0	0	0	611
P47897	Glutamine--tRNA ligase	QARS	Glutamine--tRNA ligase OS=Homo sapiens OX=9606 GN=QARS PE=1 SV=1		0	0	0	0	0	0	612
P48067	Sodium- and chloride-dependent glycine transporter 1	SLC6A9	Sodium- and chloride-dependent glycine transporter 1 OS=Homo sapiens OX=9606 GN=SLC6A9 PE=1 SV=3		0	0	0	0	0	0	613
P48200	Iron-responsive element-binding protein 2	IREB2	Iron-responsive element-binding protein 2 OS=Homo sapiens OX=9606 GN=IREB2 PE=1 SV=4		0	0	0	0	0	0	614
P48426	Phosphatidylinositol 5-phosphate 4-kinase type-2 alpha	PIP4K2A	Phosphatidylinositol 5-phosphate 4-kinase type-2 alpha OS=Homo sapiens OX=9606 GN=PIP4K2A PE=1 SV=2		0	0	0	0	0	0	615
P48454	Serine/threonine-protein phosphatase 2B catalytic subunit gamma isoform	PPP3CC	Serine/threonine-protein phosphatase 2B catalytic subunit gamma isoform OS=Homo sapiens OX=9606 GN=PPP3CC PE=1 SV=3		0	0	0	0	0	0	616
P48507	Glutamate--cysteine ligase regulatory subunit	GCLM	Glutamate--cysteine ligase regulatory subunit OS=Homo sapiens OX=9606 GN=GCLM PE=1 SV=1		0	0	0	0	0	0	617
P48739	Phosphatidylinositol transfer protein beta isoform	PITPNB	Phosphatidylinositol transfer protein beta isoform OS=Homo sapiens OX=9606 GN=PITPNB PE=1 SV=2		0	0	0	0	0	0	618
P49419	Alpha-aminoadipic semialdehyde dehydrogenase	ALDH7A1	Alpha-aminoadipic semialdehyde dehydrogenase OS=Homo sapiens OX=9606 GN=ALDH7A1 PE=1 SV=5		0	0	0	0	0	0	619
P49458	Signal recognition particle 9 kDa protein	SRP9	Signal recognition particle 9 kDa protein OS=Homo sapiens OX=9606 GN=SRP9 PE=1 SV=2		0	0	0	0	0	0	620
P49642	DNA primase small subunit	PRIM1	DNA primase small subunit OS=Homo sapiens OX=9606 GN=PRIM1 PE=1 SV=1		0	0	0	0	0	0	621
P49643	DNA primase large subunit	PRIM2	DNA primase large subunit OS=Homo sapiens OX=9606 GN=PRIM2 PE=1 SV=2		0	0	0	0	0	0	622
P49674	Casein kinase I isoform epsilon	CSNK1E	Casein kinase I isoform epsilon OS=Homo sapiens OX=9606 GN=CSNK1E PE=1 SV=1		0	0	0	0	0	0	623
P49711	Transcriptional repressor CTCF	CTCF	Transcriptional repressor CTCF OS=Homo sapiens OX=9606 GN=CTCF PE=1 SV=1		0	0	0	0	0	0	624
P49720	Proteasome subunit beta type-3	PSMB3	Proteasome subunit beta type-3 OS=Homo sapiens OX=9606 GN=PSMB3 PE=1 SV=2		0	0	0	0	0	0	625
P49754	Vacuolar protein sorting-associated protein 41 homolog	VPS41	Vacuolar protein sorting-associated protein 41 homolog OS=Homo sapiens OX=9606 GN=VPS41 PE=1 SV=3		0	0	0	0	0	0	626
Q9HAZ1;P49759	Dual specificity protein kinase CLK4;Dual specificity protein kinase CLK1	CLK4;CLK1	Dual specificity protein kinase CLK4 OS=Homo sapiens OX=9606 GN=CLK4 PE=1 SV=1;Dual specificity protein kinase CLK1 OS=Homo sapiens OX=9606 GN=CLK1 PE=1 SV=2		0	0	0	0	0	0	627
P49792	E3 SUMO-protein ligase RanBP2	RANBP2	E3 SUMO-protein ligase RanBP2 OS=Homo sapiens OX=9606 GN=RANBP2 PE=1 SV=2		0	0	0	0	0	0	628
P49795	Regulator of G-protein signaling 19	RGS19	Regulator of G-protein signaling 19 OS=Homo sapiens OX=9606 GN=RGS19 PE=1 SV=1		0	0	0	0	0	0	629
P49810	Presenilin-2;Presenilin-2 NTF subunit;Presenilin-2 CTF subunit	PSEN2	Presenilin-2 OS=Homo sapiens OX=9606 GN=PSEN2 PE=1 SV=1		0	0	0	0	0	0	630
P49821	NADH dehydrogenase [ubiquinone] flavoprotein 1, mitochondrial	NDUFV1	NADH dehydrogenase [ubiquinone] flavoprotein 1, mitochondrial OS=Homo sapiens OX=9606 GN=NDUFV1 PE=1 SV=4		0	0	0	0	0	0	631
P49840	Glycogen synthase kinase-3 alpha	GSK3A	Glycogen synthase kinase-3 alpha OS=Homo sapiens OX=9606 GN=GSK3A PE=1 SV=2		0	0	0	0	0	0	632
P49902	Cytosolic purine 5-nucleotidase	NT5C2	Cytosolic purine 5-nucleotidase OS=Homo sapiens OX=9606 GN=NT5C2 PE=1 SV=1		0	0	0	0	0	0	633
P49917	DNA ligase 4	LIG4	DNA ligase 4 OS=Homo sapiens OX=9606 GN=LIG4 PE=1 SV=2		0	0	0	0	0	0	634
P50151	Guanine nucleotide-binding protein G(I)/G(S)/G(O) subunit gamma-10	GNG10	Guanine nucleotide-binding protein G(I)/G(S)/G(O) subunit gamma-10 OS=Homo sapiens OX=9606 GN=GNG10 PE=1 SV=1		0	0	0	0	0	0	635
P50336	Protoporphyrinogen oxidase	PPOX	Protoporphyrinogen oxidase OS=Homo sapiens OX=9606 GN=PPOX PE=1 SV=1		0	0	0	0	0	0	636
P50443	Sulfate transporter	SLC26A2	Sulfate transporter OS=Homo sapiens OX=9606 GN=SLC26A2 PE=1 SV=2		0	0	0	0	0	0	637
Q8IZP2;P50502;Q8NFI4	Putative protein FAM10A4;Hsc70-interacting protein;Putative protein FAM10A5	ST13P4;ST13;ST13P5	Putative protein FAM10A4 OS=Homo sapiens OX=9606 GN=ST13P4 PE=5 SV=1;Hsc70-interacting protein OS=Homo sapiens OX=9606 GN=ST13 PE=1 SV=2;Putative protein FAM10A5 OS=Homo sapiens OX=9606 GN=ST13P5 PE=5 SV=1		0	0	0	0	0	0	638
P50750	Cyclin-dependent kinase 9	CDK9	Cyclin-dependent kinase 9 OS=Homo sapiens OX=9606 GN=CDK9 PE=1 SV=3		0	0	0	0	0	0	639
P51397	Death-associated protein 1	DAP	Death-associated protein 1 OS=Homo sapiens OX=9606 GN=DAP PE=1 SV=3		0	0	0	0	0	0	640
P51531	Probable global transcription activator SNF2L2	SMARCA2	Probable global transcription activator SNF2L2 OS=Homo sapiens OX=9606 GN=SMARCA2 PE=1 SV=2		0	0	0	0	0	0	641
P51608	Methyl-CpG-binding protein 2	MECP2	Methyl-CpG-binding protein 2 OS=Homo sapiens OX=9606 GN=MECP2 PE=1 SV=1		0	0	0	0	0	0	642
P51636	Caveolin-2	CAV2	Caveolin-2 OS=Homo sapiens OX=9606 GN=CAV2 PE=1 SV=2		0	0	0	0	0	0	643
P51665	26S proteasome non-ATPase regulatory subunit 7	PSMD7	26S proteasome non-ATPase regulatory subunit 7 OS=Homo sapiens OX=9606 GN=PSMD7 PE=1 SV=2		0	0	0	0	0	0	644
P51790	H(+)/Cl(-) exchange transporter 3	CLCN3	H(+)/Cl(-) exchange transporter 3 OS=Homo sapiens OX=9606 GN=CLCN3 PE=1 SV=2		0	0	0	0	0	0	645
P51797	Chloride transport protein 6	CLCN6	Chloride transport protein 6 OS=Homo sapiens OX=9606 GN=CLCN6 PE=1 SV=2		0	0	0	0	0	0	646
P51808	Dynein light chain Tctex-type 3	DYNLT3	Dynein light chain Tctex-type 3 OS=Homo sapiens OX=9606 GN=DYNLT3 PE=1 SV=1		0	0	0	0	0	0	647
P51858	Hepatoma-derived growth factor	HDGF	Hepatoma-derived growth factor OS=Homo sapiens OX=9606 GN=HDGF PE=1 SV=1		0	0	0	0	0	0	648
P51946	Cyclin-H	CCNH	Cyclin-H OS=Homo sapiens OX=9606 GN=CCNH PE=1 SV=1		0	0	0	0	0	0	649
P52294;O60684;O15131	Importin subunit alpha-5;Importin subunit alpha-5, N-terminally processed;Importin subunit alpha-7;Importin subunit alpha-6	KPNA1;KPNA6;KPNA5	Importin subunit alpha-5 OS=Homo sapiens OX=9606 GN=KPNA1 PE=1 SV=3;Importin subunit alpha-7 OS=Homo sapiens OX=9606 GN=KPNA6 PE=1 SV=1;Importin subunit alpha-6 OS=Homo sapiens OX=9606 GN=KPNA5 PE=1 SV=2		0	0	0	0	0	0	650
P52429	Diacylglycerol kinase epsilon	DGKE	Diacylglycerol kinase epsilon OS=Homo sapiens OX=9606 GN=DGKE PE=1 SV=1		0	0	0	0	0	0	651
P52565	Rho GDP-dissociation inhibitor 1	ARHGDIA	Rho GDP-dissociation inhibitor 1 OS=Homo sapiens OX=9606 GN=ARHGDIA PE=1 SV=3		0	0	0	0	0	0	652
P52597	Heterogeneous nuclear ribonucleoprotein F;Heterogeneous nuclear ribonucleoprotein F, N-terminally processed	HNRNPF	Heterogeneous nuclear ribonucleoprotein F OS=Homo sapiens OX=9606 GN=HNRNPF PE=1 SV=3		0	0	0	0	0	0	653
P52701	DNA mismatch repair protein Msh6	MSH6	DNA mismatch repair protein Msh6 OS=Homo sapiens OX=9606 GN=MSH6 PE=1 SV=2		0	0	0	0	0	0	654
P52732	Kinesin-like protein KIF11	KIF11	Kinesin-like protein KIF11 OS=Homo sapiens OX=9606 GN=KIF11 PE=1 SV=2		0	0	0	0	0	0	655
P52789;P52790	Hexokinase-2	HK2	Hexokinase-2 OS=Homo sapiens OX=9606 GN=HK2 PE=1 SV=2		0	0	0	0	0	0	656
P52948	Nuclear pore complex protein Nup98-Nup96;Nuclear pore complex protein Nup98;Nuclear pore complex protein Nup96	NUP98	Nuclear pore complex protein Nup98-Nup96 OS=Homo sapiens OX=9606 GN=NUP98 PE=1 SV=4		0	0	0	0	0	0	657
P53350	Serine/threonine-protein kinase PLK1	PLK1	Serine/threonine-protein kinase PLK1 OS=Homo sapiens OX=9606 GN=PLK1 PE=1 SV=1		0	0	0	0	0	0	658
P53367	Arfaptin-1	ARFIP1	Arfaptin-1 OS=Homo sapiens OX=9606 GN=ARFIP1 PE=1 SV=2		0	0	0	0	0	0	659
P53990	IST1 homolog	IST1	IST1 homolog OS=Homo sapiens OX=9606 GN=IST1 PE=1 SV=1		0	0	0	0	0	0	660
P54132	Bloom syndrome protein	BLM	Bloom syndrome protein OS=Homo sapiens OX=9606 GN=BLM PE=1 SV=1		0	0	0	0	0	0	661
P54136	Arginine--tRNA ligase, cytoplasmic	RARS	Arginine--tRNA ligase, cytoplasmic OS=Homo sapiens OX=9606 GN=RARS PE=1 SV=2		0	0	0	0	0	0	662
P54577	Tyrosine--tRNA ligase, cytoplasmic;Tyrosine--tRNA ligase, cytoplasmic, N-terminally processed	YARS	Tyrosine--tRNA ligase, cytoplasmic OS=Homo sapiens OX=9606 GN=YARS PE=1 SV=4		0	0	0	0	0	0	663
P54578	Ubiquitin carboxyl-terminal hydrolase 14	USP14	Ubiquitin carboxyl-terminal hydrolase 14 OS=Homo sapiens OX=9606 GN=USP14 PE=1 SV=3		0	0	0	0	0	0	664
P54619;Q9UGJ0	5-AMP-activated protein kinase subunit gamma-1;5-AMP-activated protein kinase subunit gamma-2	PRKAG1;PRKAG2	5-AMP-activated protein kinase subunit gamma-1 OS=Homo sapiens OX=9606 GN=PRKAG1 PE=1 SV=1;5-AMP-activated protein kinase subunit gamma-2 OS=Homo sapiens OX=9606 GN=PRKAG2 PE=1 SV=1		0	0	0	0	0	0	665
P54707	Potassium-transporting ATPase alpha chain 2	ATP12A	Potassium-transporting ATPase alpha chain 2 OS=Homo sapiens OX=9606 GN=ATP12A PE=1 SV=3		0	0	0	0	0	0	666
P54760;P54753	Ephrin type-B receptor 4;Ephrin type-B receptor 3	EPHB4;EPHB3	Ephrin type-B receptor 4 OS=Homo sapiens OX=9606 GN=EPHB4 PE=1 SV=2;Ephrin type-B receptor 3 OS=Homo sapiens OX=9606 GN=EPHB3 PE=1 SV=2		0	0	0	0	0	0	667
P54802	Alpha-N-acetylglucosaminidase;Alpha-N-acetylglucosaminidase 82 kDa form;Alpha-N-acetylglucosaminidase 77 kDa form	NAGLU	Alpha-N-acetylglucosaminidase OS=Homo sapiens OX=9606 GN=NAGLU PE=1 SV=2		0	0	0	0	0	0	668
P55010	Eukaryotic translation initiation factor 5	EIF5	Eukaryotic translation initiation factor 5 OS=Homo sapiens OX=9606 GN=EIF5 PE=1 SV=2		0	0	0	0	0	0	669
P55011	Solute carrier family 12 member 2	SLC12A2	Solute carrier family 12 member 2 OS=Homo sapiens OX=9606 GN=SLC12A2 PE=1 SV=1		0	0	0	0	0	0	670
P55036;A2A3N6	26S proteasome non-ATPase regulatory subunit 4	PSMD4	26S proteasome non-ATPase regulatory subunit 4 OS=Homo sapiens OX=9606 GN=PSMD4 PE=1 SV=1		0	0	0	0	0	0	671
P55145	Mesencephalic astrocyte-derived neurotrophic factor	MANF	Mesencephalic astrocyte-derived neurotrophic factor OS=Homo sapiens OX=9606 GN=MANF PE=1 SV=3		0	0	0	0	0	0	672
P55209;Q99733	Nucleosome assembly protein 1-like 1	NAP1L1	Nucleosome assembly protein 1-like 1 OS=Homo sapiens OX=9606 GN=NAP1L1 PE=1 SV=1		0	0	0	0	0	0	673
P55290	Cadherin-13	CDH13	Cadherin-13 OS=Homo sapiens OX=9606 GN=CDH13 PE=1 SV=1		0	0	0	0	0	0	674
P55735	Protein SEC13 homolog	SEC13	Protein SEC13 homolog OS=Homo sapiens OX=9606 GN=SEC13 PE=1 SV=3		0	0	0	0	0	0	675
P55795	Heterogeneous nuclear ribonucleoprotein H2	HNRNPH2	Heterogeneous nuclear ribonucleoprotein H2 OS=Homo sapiens OX=9606 GN=HNRNPH2 PE=1 SV=1		0	0	0	0	0	0	676
Q6EEV6;P61956;P55854	Small ubiquitin-related modifier 4;Small ubiquitin-related modifier 2;Small ubiquitin-related modifier 3	SUMO4;SUMO2;SUMO3	Small ubiquitin-related modifier 4 OS=Homo sapiens OX=9606 GN=SUMO4 PE=1 SV=2;Small ubiquitin-related modifier 2 OS=Homo sapiens OX=9606 GN=SUMO2 PE=1 SV=3;Small ubiquitin-related modifier 3 OS=Homo sapiens OX=9606 GN=SUMO3 PE=1 SV=2		0	0	0	0	0	0	677
P56192	Methionine--tRNA ligase, cytoplasmic	MARS	Methionine--tRNA ligase, cytoplasmic OS=Homo sapiens OX=9606 GN=MARS PE=1 SV=2		0	0	0	0	0	0	678
P56537	Eukaryotic translation initiation factor 6	EIF6	Eukaryotic translation initiation factor 6 OS=Homo sapiens OX=9606 GN=EIF6 PE=1 SV=1		0	0	0	0	0	0	679
P56545	C-terminal-binding protein 2	CTBP2	C-terminal-binding protein 2 OS=Homo sapiens OX=9606 GN=CTBP2 PE=1 SV=1		0	0	0	0	0	0	680
P56749	Claudin-12	CLDN12	Claudin-12 OS=Homo sapiens OX=9606 GN=CLDN12 PE=1 SV=1		0	0	0	0	0	0	681
P57678	Gem-associated protein 4	GEMIN4	Gem-associated protein 4 OS=Homo sapiens OX=9606 GN=GEMIN4 PE=1 SV=2		0	0	0	0	0	0	682
P57740	Nuclear pore complex protein Nup107	NUP107	Nuclear pore complex protein Nup107 OS=Homo sapiens OX=9606 GN=NUP107 PE=1 SV=1		0	0	0	0	0	0	683
P58107	Epiplakin	EPPK1	Epiplakin OS=Homo sapiens OX=9606 GN=EPPK1 PE=1 SV=3		0	0	0	0	0	0	684
P58557	Putative ribonuclease	YBEY	Endoribonuclease YbeY OS=Homo sapiens OX=9606 GN=YBEY PE=1 SV=2		0	0	0	0	0	0	685
P60602	Reactive oxygen species modulator 1	ROMO1	Reactive oxygen species modulator 1 OS=Homo sapiens OX=9606 GN=ROMO1 PE=1 SV=1		0	0	0	0	0	0	686
P60660;P14649	Myosin light polypeptide 6	MYL6	Myosin light polypeptide 6 OS=Homo sapiens OX=9606 GN=MYL6 PE=1 SV=2		0	0	0	0	0	0	687
P60763	Ras-related C3 botulinum toxin substrate 3	RAC3	Ras-related C3 botulinum toxin substrate 3 OS=Homo sapiens OX=9606 GN=RAC3 PE=1 SV=1		0	0	0	0	0	0	688
P60880	Synaptosomal-associated protein 25	SNAP25	Synaptosomal-associated protein 25 OS=Homo sapiens OX=9606 GN=SNAP25 PE=1 SV=1		0	0	0	0	0	0	689
P60900	Proteasome subunit alpha type-6	PSMA6	Proteasome subunit alpha type-6 OS=Homo sapiens OX=9606 GN=PSMA6 PE=1 SV=1		0	0	0	0	0	0	690
P62837;P61077;Q9Y2X8;P51668	Ubiquitin-conjugating enzyme E2 D2;Ubiquitin-conjugating enzyme E2 D3	UBE2D2;UBE2D3	Ubiquitin-conjugating enzyme E2 D2 OS=Homo sapiens OX=9606 GN=UBE2D2 PE=1 SV=1;Ubiquitin-conjugating enzyme E2 D3 OS=Homo sapiens OX=9606 GN=UBE2D3 PE=1 SV=1		0	0	0	0	0	0	691
P61081	NEDD8-conjugating enzyme Ubc12	UBE2M	NEDD8-conjugating enzyme Ubc12 OS=Homo sapiens OX=9606 GN=UBE2M PE=1 SV=1		0	0	0	0	0	0	692
P61088;Q5JXB2	Ubiquitin-conjugating enzyme E2 N	UBE2N	Ubiquitin-conjugating enzyme E2 N OS=Homo sapiens OX=9606 GN=UBE2N PE=1 SV=1		0	0	0	0	0	0	693
P61165	Transmembrane protein 258	TMEM258	Transmembrane protein 258 OS=Homo sapiens OX=9606 GN=TMEM258 PE=1 SV=1		0	0	0	0	0	0	694
P61201	COP9 signalosome complex subunit 2	COPS2	COP9 signalosome complex subunit 2 OS=Homo sapiens OX=9606 GN=COPS2 PE=1 SV=1		0	0	0	0	0	0	695
P61289	Proteasome activator complex subunit 3	PSME3	Proteasome activator complex subunit 3 OS=Homo sapiens OX=9606 GN=PSME3 PE=1 SV=1		0	0	0	0	0	0	696
P61326	Protein mago nashi homolog	MAGOH	Protein mago nashi homolog OS=Homo sapiens OX=9606 GN=MAGOH PE=1 SV=1		0	0	0	0	0	0	697
P61599	N-alpha-acetyltransferase 20	NAA20	N-alpha-acetyltransferase 20 OS=Homo sapiens OX=9606 GN=NAA20 PE=1 SV=1		0	0	0	0	0	0	698
P62191	26S protease regulatory subunit 4	PSMC1	26S proteasome regulatory subunit 4 OS=Homo sapiens OX=9606 GN=PSMC1 PE=1 SV=1		0	0	0	0	0	0	699
P62195;Q8NB90	26S protease regulatory subunit 8;Spermatogenesis-associated protein 5	PSMC5;SPATA5	26S proteasome regulatory subunit 8 OS=Homo sapiens OX=9606 GN=PSMC5 PE=1 SV=1;ATPase family protein 2 homolog OS=Homo sapiens OX=9606 GN=SPATA5 PE=1 SV=3		0	0	0	0	0	0	700
P62333	26S protease regulatory subunit 10B	PSMC6	26S proteasome regulatory subunit 10B OS=Homo sapiens OX=9606 GN=PSMC6 PE=1 SV=1		0	0	0	0	0	0	701
P62341	Selenoprotein T	SELT	Thioredoxin reductase-like selenoprotein T OS=Homo sapiens OX=9606 GN=SELENOT PE=1 SV=2		0	0	0	0	0	0	702
P63261	Actin, cytoplasmic 2;Actin, cytoplasmic 2, N-terminally processed	ACTG1	Actin, cytoplasmic 2 OS=Homo sapiens OX=9606 GN=ACTG1 PE=1 SV=1		0	0	0	0	0	0	703
P63279	SUMO-conjugating enzyme UBC9	UBE2I	SUMO-conjugating enzyme UBC9 OS=Homo sapiens OX=9606 GN=UBE2I PE=1 SV=1		0	0	0	0	0	0	704
P67870	Casein kinase II subunit beta	CSNK2B	Casein kinase II subunit beta OS=Homo sapiens OX=9606 GN=CSNK2B PE=1 SV=1		0	0	0	0	0	0	705
P78324	Tyrosine-protein phosphatase non-receptor type substrate 1	SIRPA	Tyrosine-protein phosphatase non-receptor type substrate 1 OS=Homo sapiens OX=9606 GN=SIRPA PE=1 SV=2		0	0	0	0	0	0	706
P78333	Glypican-5;Secreted glypican-5	GPC5	Glypican-5 OS=Homo sapiens OX=9606 GN=GPC5 PE=2 SV=1		0	0	0	0	0	0	707
P78345	Ribonuclease P protein subunit p38	RPP38	Ribonuclease P protein subunit p38 OS=Homo sapiens OX=9606 GN=RPP38 PE=1 SV=2		0	0	0	0	0	0	708
P78347;Q86UP8;Q6EKJ0	General transcription factor II-I	GTF2I	General transcription factor II-I OS=Homo sapiens OX=9606 GN=GTF2I PE=1 SV=2		0	0	0	0	0	0	709
P78357	Contactin-associated protein 1	CNTNAP1	Contactin-associated protein 1 OS=Homo sapiens OX=9606 GN=CNTNAP1 PE=1 SV=1		0	0	0	0	0	0	710
P78362	SRSF protein kinase 2;SRSF protein kinase 2 N-terminal;SRSF protein kinase 2 C-terminal	SRPK2	SRSF protein kinase 2 OS=Homo sapiens OX=9606 GN=SRPK2 PE=1 SV=3		0	0	0	0	0	0	711
P78371	T-complex protein 1 subunit beta	CCT2	T-complex protein 1 subunit beta OS=Homo sapiens OX=9606 GN=CCT2 PE=1 SV=4		0	0	0	0	0	0	712
P78383	Solute carrier family 35 member B1	SLC35B1	Solute carrier family 35 member B1 OS=Homo sapiens OX=9606 GN=SLC35B1 PE=1 SV=1		0	0	0	0	0	0	713
P78406	mRNA export factor	RAE1	mRNA export factor OS=Homo sapiens OX=9606 GN=RAE1 PE=1 SV=1		0	0	0	0	0	0	714
P78417	Glutathione S-transferase omega-1	GSTO1	Glutathione S-transferase omega-1 OS=Homo sapiens OX=9606 GN=GSTO1 PE=1 SV=2		0	0	0	0	0	0	715
P78504	Protein jagged-1	JAG1	Protein jagged-1 OS=Homo sapiens OX=9606 GN=JAG1 PE=1 SV=3		0	0	0	0	0	0	716
P78549	Endonuclease III-like protein 1	NTHL1	Endonuclease III-like protein 1 OS=Homo sapiens OX=9606 GN=NTHL1 PE=1 SV=2		0	0	0	0	0	0	717
P78563	Double-stranded RNA-specific editase 1	ADARB1	Double-stranded RNA-specific editase 1 OS=Homo sapiens OX=9606 GN=ADARB1 PE=1 SV=1		0	0	0	0	0	0	718
P82673	28S ribosomal protein S35, mitochondrial	MRPS35	28S ribosomal protein S35, mitochondrial OS=Homo sapiens OX=9606 GN=MRPS35 PE=1 SV=1		0	0	0	0	0	0	719
P82675	28S ribosomal protein S5, mitochondrial	MRPS5	28S ribosomal protein S5, mitochondrial OS=Homo sapiens OX=9606 GN=MRPS5 PE=1 SV=2		0	0	0	0	0	0	720
P82912	28S ribosomal protein S11, mitochondrial	MRPS11	28S ribosomal protein S11, mitochondrial OS=Homo sapiens OX=9606 GN=MRPS11 PE=1 SV=2		0	0	0	0	0	0	721
P82914	28S ribosomal protein S15, mitochondrial	MRPS15	28S ribosomal protein S15, mitochondrial OS=Homo sapiens OX=9606 GN=MRPS15 PE=1 SV=1		0	0	0	0	0	0	722
P82921	28S ribosomal protein S21, mitochondrial	MRPS21	28S ribosomal protein S21, mitochondrial OS=Homo sapiens OX=9606 GN=MRPS21 PE=1 SV=3		0	0	0	0	0	0	723
P82970	High mobility group nucleosome-binding domain-containing protein 5	HMGN5	High mobility group nucleosome-binding domain-containing protein 5 OS=Homo sapiens OX=9606 GN=HMGN5 PE=1 SV=1		0	0	0	0	0	0	724
P82979	SAP domain-containing ribonucleoprotein	SARNP	SAP domain-containing ribonucleoprotein OS=Homo sapiens OX=9606 GN=SARNP PE=1 SV=3		0	0	0	0	0	0	725
P83111	Serine beta-lactamase-like protein LACTB, mitochondrial	LACTB	Serine beta-lactamase-like protein LACTB, mitochondrial OS=Homo sapiens OX=9606 GN=LACTB PE=1 SV=2		0	0	0	0	0	0	726
P84022;O15198	Mothers against decapentaplegic homolog 3;Mothers against decapentaplegic homolog 9	SMAD3;SMAD9	Mothers against decapentaplegic homolog 3 OS=Homo sapiens OX=9606 GN=SMAD3 PE=1 SV=1;Mothers against decapentaplegic homolog 9 OS=Homo sapiens OX=9606 GN=SMAD9 PE=1 SV=1		0	0	0	0	0	0	727
P85037	Forkhead box protein K1	FOXK1	Forkhead box protein K1 OS=Homo sapiens OX=9606 GN=FOXK1 PE=1 SV=1		0	0	0	0	0	0	728
P98155	Very low-density lipoprotein receptor	VLDLR	Very low-density lipoprotein receptor OS=Homo sapiens OX=9606 GN=VLDLR PE=1 SV=1		0	0	0	0	0	0	729
P98172	Ephrin-B1	EFNB1	Ephrin-B1 OS=Homo sapiens OX=9606 GN=EFNB1 PE=1 SV=1		0	0	0	0	0	0	730
P98179	RNA-binding protein 3	RBM3	RNA-binding protein 3 OS=Homo sapiens OX=9606 GN=RBM3 PE=1 SV=1		0	0	0	0	0	0	731
P98196	Probable phospholipid-transporting ATPase IH	ATP11A	Probable phospholipid-transporting ATPase IH OS=Homo sapiens OX=9606 GN=ATP11A PE=1 SV=3		0	0	0	0	0	0	732
Q00403	Transcription initiation factor IIB	GTF2B	Transcription initiation factor IIB OS=Homo sapiens OX=9606 GN=GTF2B PE=1 SV=1		0	0	0	0	0	0	733
Q00535	Cyclin-dependent-like kinase 5	CDK5	Cyclin-dependent-like kinase 5 OS=Homo sapiens OX=9606 GN=CDK5 PE=1 SV=3		0	0	0	0	0	0	734
Q00577	Transcriptional activator protein Pur-alpha	PURA	Transcriptional activator protein Pur-alpha OS=Homo sapiens OX=9606 GN=PURA PE=1 SV=2		0	0	0	0	0	0	735
Q00796	Sorbitol dehydrogenase	SORD	Sorbitol dehydrogenase OS=Homo sapiens OX=9606 GN=SORD PE=1 SV=4		0	0	0	0	0	0	736
Q00973	Beta-1,4 N-acetylgalactosaminyltransferase 1	B4GALNT1	Beta-1,4 N-acetylgalactosaminyltransferase 1 OS=Homo sapiens OX=9606 GN=B4GALNT1 PE=1 SV=2		0	0	0	0	0	0	737
Q01085;P31483	Nucleolysin TIAR;Nucleolysin TIA-1 isoform p40	TIAL1;TIA1	Nucleolysin TIAR OS=Homo sapiens OX=9606 GN=TIAL1 PE=1 SV=1;Nucleolysin TIA-1 isoform p40 OS=Homo sapiens OX=9606 GN=TIA1 PE=1 SV=3		0	0	0	0	0	0	738
Q01629	Interferon-induced transmembrane protein 2	IFITM2	Interferon-induced transmembrane protein 2 OS=Homo sapiens OX=9606 GN=IFITM2 PE=1 SV=2		0	0	0	0	0	0	739
Q01968	Inositol polyphosphate 5-phosphatase OCRL-1	OCRL	Inositol polyphosphate 5-phosphatase OCRL OS=Homo sapiens OX=9606 GN=OCRL PE=1 SV=3		0	0	0	0	0	0	740
Q01970	1-phosphatidylinositol 4,5-bisphosphate phosphodiesterase beta-3	PLCB3	1-phosphatidylinositol 4,5-bisphosphate phosphodiesterase beta-3 OS=Homo sapiens OX=9606 GN=PLCB3 PE=1 SV=2		0	0	0	0	0	0	741
Q02127	Dihydroorotate dehydrogenase (quinone), mitochondrial	DHODH	Dihydroorotate dehydrogenase (quinone), mitochondrial OS=Homo sapiens OX=9606 GN=DHODH PE=1 SV=3		0	0	0	0	0	0	742
Q02338	D-beta-hydroxybutyrate dehydrogenase, mitochondrial	BDH1	D-beta-hydroxybutyrate dehydrogenase, mitochondrial OS=Homo sapiens OX=9606 GN=BDH1 PE=1 SV=3		0	0	0	0	0	0	743
Q02413	Desmoglein-1	DSG1	Desmoglein-1 OS=Homo sapiens OX=9606 GN=DSG1 PE=1 SV=2		0	0	0	0	0	0	744
Q02750;P36507	Dual specificity mitogen-activated protein kinase kinase 1;Dual specificity mitogen-activated protein kinase kinase 2	MAP2K1;MAP2K2	Dual specificity mitogen-activated protein kinase kinase 1 OS=Homo sapiens OX=9606 GN=MAP2K1 PE=1 SV=2;Dual specificity mitogen-activated protein kinase kinase 2 OS=Homo sapiens OX=9606 GN=MAP2K2 PE=1 SV=1		0	0	0	0	0	0	745
Q02930	Cyclic AMP-responsive element-binding protein 5	CREB5	Cyclic AMP-responsive element-binding protein 5 OS=Homo sapiens OX=9606 GN=CREB5 PE=1 SV=3		0	0	0	0	0	0	746
Q03001	Dystonin	DST	Dystonin OS=Homo sapiens OX=9606 GN=DST PE=1 SV=4		0	0	0	0	0	0	747
Q03164	Histone-lysine N-methyltransferase 2A;MLL cleavage product N320;MLL cleavage product C180	KMT2A	Histone-lysine N-methyltransferase 2A OS=Homo sapiens OX=9606 GN=KMT2A PE=1 SV=5		0	0	0	0	0	0	748
Q04771	Activin receptor type-1	ACVR1	Activin receptor type-1 OS=Homo sapiens OX=9606 GN=ACVR1 PE=1 SV=1		0	0	0	0	0	0	749
Q04828	Aldo-keto reductase family 1 member C1	AKR1C1	Aldo-keto reductase family 1 member C1 OS=Homo sapiens OX=9606 GN=AKR1C1 PE=1 SV=1		0	0	0	0	0	0	750
Q04917	14-3-3 protein eta	YWHAH	14-3-3 protein eta OS=Homo sapiens OX=9606 GN=YWHAH PE=1 SV=4		0	0	0	0	0	0	751
Q04941	Proteolipid protein 2	PLP2	Proteolipid protein 2 OS=Homo sapiens OX=9606 GN=PLP2 PE=1 SV=1		0	0	0	0	0	0	752
Q05048	Cleavage stimulation factor subunit 1	CSTF1	Cleavage stimulation factor subunit 1 OS=Homo sapiens OX=9606 GN=CSTF1 PE=1 SV=1		0	0	0	0	0	0	753
Q05932	Folylpolyglutamate synthase, mitochondrial	FPGS	Folylpolyglutamate synthase, mitochondrial OS=Homo sapiens OX=9606 GN=FPGS PE=1 SV=3		0	0	0	0	0	0	754
Q06265	Exosome complex component RRP45	EXOSC9	Exosome complex component RRP45 OS=Homo sapiens OX=9606 GN=EXOSC9 PE=1 SV=3		0	0	0	0	0	0	755
Q06323	Proteasome activator complex subunit 1	PSME1	Proteasome activator complex subunit 1 OS=Homo sapiens OX=9606 GN=PSME1 PE=1 SV=1		0	0	0	0	0	0	756
Q06330;Q9UBG7	Recombining binding protein suppressor of hairless	RBPJ	Recombining binding protein suppressor of hairless OS=Homo sapiens OX=9606 GN=RBPJ PE=1 SV=3		0	0	0	0	0	0	757
Q06481	Amyloid-like protein 2	APLP2	Amyloid-like protein 2 OS=Homo sapiens OX=9606 GN=APLP2 PE=1 SV=2		0	0	0	0	0	0	758
Q07021	Complement component 1 Q subcomponent-binding protein, mitochondrial	C1QBP	Complement component 1 Q subcomponent-binding protein, mitochondrial OS=Homo sapiens OX=9606 GN=C1QBP PE=1 SV=1		0	0	0	0	0	0	759
Q07157	Tight junction protein ZO-1	TJP1	Tight junction protein ZO-1 OS=Homo sapiens OX=9606 GN=TJP1 PE=1 SV=3		0	0	0	0	0	0	760
Q07812	Apoptosis regulator BAX	BAX	Apoptosis regulator BAX OS=Homo sapiens OX=9606 GN=BAX PE=1 SV=1		0	0	0	0	0	0	761
Q07960	Rho GTPase-activating protein 1	ARHGAP1	Rho GTPase-activating protein 1 OS=Homo sapiens OX=9606 GN=ARHGAP1 PE=1 SV=1		0	0	0	0	0	0	762
Q08209;P16298	Serine/threonine-protein phosphatase 2B catalytic subunit alpha isoform;Serine/threonine-protein phosphatase 2B catalytic subunit beta isoform	PPP3CA;PPP3CB	Serine/threonine-protein phosphatase 2B catalytic subunit alpha isoform OS=Homo sapiens OX=9606 GN=PPP3CA PE=1 SV=1;Serine/threonine-protein phosphatase 2B catalytic subunit beta isoform OS=Homo sapiens OX=9606 GN=PPP3CB PE=1 SV=2		0	0	0	0	0	0	763
Q08431	Lactadherin;Lactadherin short form;Medin	MFGE8	Lactadherin OS=Homo sapiens OX=9606 GN=MFGE8 PE=1 SV=3		0	0	0	0	0	0	764
Q08AM6	Protein VAC14 homolog	VAC14	Protein VAC14 homolog OS=Homo sapiens OX=9606 GN=VAC14 PE=1 SV=1		0	0	0	0	0	0	765
Q09028;Q16576	Histone-binding protein RBBP4;Histone-binding protein RBBP7	RBBP4;RBBP7	Histone-binding protein RBBP4 OS=Homo sapiens OX=9606 GN=RBBP4 PE=1 SV=3;Histone-binding protein RBBP7 OS=Homo sapiens OX=9606 GN=RBBP7 PE=1 SV=1		0	0	0	0	0	0	766
Q09161	Nuclear cap-binding protein subunit 1	NCBP1	Nuclear cap-binding protein subunit 1 OS=Homo sapiens OX=9606 GN=NCBP1 PE=1 SV=1		0	0	0	0	0	0	767
Q0P6H9	Transmembrane protein 62	TMEM62	Transmembrane protein 62 OS=Homo sapiens OX=9606 GN=TMEM62 PE=1 SV=1		0	0	0	0	0	0	768
Q0VGL1	Ragulator complex protein LAMTOR4;Ragulator complex protein LAMTOR4, N-terminally processed	LAMTOR4	Ragulator complex protein LAMTOR4 OS=Homo sapiens OX=9606 GN=LAMTOR4 PE=1 SV=1		0	0	0	0	0	0	769
Q10567	AP-1 complex subunit beta-1	AP1B1	AP-1 complex subunit beta-1 OS=Homo sapiens OX=9606 GN=AP1B1 PE=1 SV=2		0	0	0	0	0	0	770
Q10570	Cleavage and polyadenylation specificity factor subunit 1	CPSF1	Cleavage and polyadenylation specificity factor subunit 1 OS=Homo sapiens OX=9606 GN=CPSF1 PE=1 SV=2		0	0	0	0	0	0	771
Q11206	CMP-N-acetylneuraminate-beta-galactosamide-alpha-2,3-sialyltransferase 4	ST3GAL4	CMP-N-acetylneuraminate-beta-galactosamide-alpha-2,3-sialyltransferase 4 OS=Homo sapiens OX=9606 GN=ST3GAL4 PE=2 SV=1		0	0	0	0	0	0	772
Q12770	Sterol regulatory element-binding protein cleavage-activating protein	SCAP	Sterol regulatory element-binding protein cleavage-activating protein OS=Homo sapiens OX=9606 GN=SCAP PE=1 SV=4		0	0	0	0	0	0	773
Q12789	General transcription factor 3C polypeptide 1	GTF3C1	General transcription factor 3C polypeptide 1 OS=Homo sapiens OX=9606 GN=GTF3C1 PE=1 SV=4		0	0	0	0	0	0	774
Q12792	Twinfilin-1	TWF1	Twinfilin-1 OS=Homo sapiens OX=9606 GN=TWF1 PE=1 SV=3		0	0	0	0	0	0	775
Q12802	A-kinase anchor protein 13	AKAP13	A-kinase anchor protein 13 OS=Homo sapiens OX=9606 GN=AKAP13 PE=1 SV=2		0	0	0	0	0	0	776
Q12873	Chromodomain-helicase-DNA-binding protein 3	CHD3	Chromodomain-helicase-DNA-binding protein 3 OS=Homo sapiens OX=9606 GN=CHD3 PE=1 SV=3		0	0	0	0	0	0	777
Q12874	Splicing factor 3A subunit 3	SF3A3	Splicing factor 3A subunit 3 OS=Homo sapiens OX=9606 GN=SF3A3 PE=1 SV=1		0	0	0	0	0	0	778
Q12891	Hyaluronidase-2	HYAL2	Hyaluronidase-2 OS=Homo sapiens OX=9606 GN=HYAL2 PE=1 SV=4		0	0	0	0	0	0	779
Q12893	Transmembrane protein 115	TMEM115	Transmembrane protein 115 OS=Homo sapiens OX=9606 GN=TMEM115 PE=1 SV=1		0	0	0	0	0	0	780
Q12894	Interferon-related developmental regulator 2	IFRD2	Interferon-related developmental regulator 2 OS=Homo sapiens OX=9606 GN=IFRD2 PE=1 SV=3		0	0	0	0	0	0	781
Q12899	Tripartite motif-containing protein 26	TRIM26	Tripartite motif-containing protein 26 OS=Homo sapiens OX=9606 GN=TRIM26 PE=1 SV=1		0	0	0	0	0	0	782
Q12913	Receptor-type tyrosine-protein phosphatase eta	PTPRJ	Receptor-type tyrosine-protein phosphatase eta OS=Homo sapiens OX=9606 GN=PTPRJ PE=1 SV=3		0	0	0	0	0	0	783
Q12974	Protein tyrosine phosphatase type IVA 2	PTP4A2	Protein tyrosine phosphatase type IVA 2 OS=Homo sapiens OX=9606 GN=PTP4A2 PE=1 SV=1		0	0	0	0	0	0	784
Q12996	Cleavage stimulation factor subunit 3	CSTF3	Cleavage stimulation factor subunit 3 OS=Homo sapiens OX=9606 GN=CSTF3 PE=1 SV=1		0	0	0	0	0	0	785
Q12999	Tetraspanin-31	TSPAN31	Tetraspanin-31 OS=Homo sapiens OX=9606 GN=TSPAN31 PE=2 SV=1		0	0	0	0	0	0	786
Q13042	Cell division cycle protein 16 homolog	CDC16	Cell division cycle protein 16 homolog OS=Homo sapiens OX=9606 GN=CDC16 PE=1 SV=2		0	0	0	0	0	0	787
Q13049	E3 ubiquitin-protein ligase TRIM32	TRIM32	E3 ubiquitin-protein ligase TRIM32 OS=Homo sapiens OX=9606 GN=TRIM32 PE=1 SV=2		0	0	0	0	0	0	788
Q13057	Bifunctional coenzyme A synthase;Phosphopantetheine adenylyltransferase;Dephospho-CoA kinase	COASY	Bifunctional coenzyme A synthase OS=Homo sapiens OX=9606 GN=COASY PE=1 SV=4		0	0	0	0	0	0	789
Q13098	COP9 signalosome complex subunit 1	GPS1	COP9 signalosome complex subunit 1 OS=Homo sapiens OX=9606 GN=GPS1 PE=1 SV=4		0	0	0	0	0	0	790
Q13131;P54646	5-AMP-activated protein kinase catalytic subunit alpha-1	PRKAA1	5-AMP-activated protein kinase catalytic subunit alpha-1 OS=Homo sapiens OX=9606 GN=PRKAA1 PE=1 SV=4		0	0	0	0	0	0	791
Q13136	Liprin-alpha-1	PPFIA1	Liprin-alpha-1 OS=Homo sapiens OX=9606 GN=PPFIA1 PE=1 SV=1		0	0	0	0	0	0	792
Q13144	Translation initiation factor eIF-2B subunit epsilon	EIF2B5	Translation initiation factor eIF-2B subunit epsilon OS=Homo sapiens OX=9606 GN=EIF2B5 PE=1 SV=3		0	0	0	0	0	0	793
Q13148	TAR DNA-binding protein 43	TARDBP	TAR DNA-binding protein 43 OS=Homo sapiens OX=9606 GN=TARDBP PE=1 SV=1		0	0	0	0	0	0	794
Q13162	Peroxiredoxin-4	PRDX4	Peroxiredoxin-4 OS=Homo sapiens OX=9606 GN=PRDX4 PE=1 SV=1		0	0	0	0	0	0	795
Q13185	Chromobox protein homolog 3	CBX3	Chromobox protein homolog 3 OS=Homo sapiens OX=9606 GN=CBX3 PE=1 SV=4		0	0	0	0	0	0	796
Q13200	26S proteasome non-ATPase regulatory subunit 2	PSMD2	26S proteasome non-ATPase regulatory subunit 2 OS=Homo sapiens OX=9606 GN=PSMD2 PE=1 SV=3		0	0	0	0	0	0	797
Q13217	DnaJ homolog subfamily C member 3	DNAJC3	DnaJ homolog subfamily C member 3 OS=Homo sapiens OX=9606 GN=DNAJC3 PE=1 SV=1		0	0	0	0	0	0	798
Q13263	Transcription intermediary factor 1-beta	TRIM28	Transcription intermediary factor 1-beta OS=Homo sapiens OX=9606 GN=TRIM28 PE=1 SV=5		0	0	0	0	0	0	799
Q13303	Voltage-gated potassium channel subunit beta-2	KCNAB2	Voltage-gated potassium channel subunit beta-2 OS=Homo sapiens OX=9606 GN=KCNAB2 PE=1 SV=2		0	0	0	0	0	0	800
Q13315	Serine-protein kinase ATM	ATM	Serine-protein kinase ATM OS=Homo sapiens OX=9606 GN=ATM PE=1 SV=4		0	0	0	0	0	0	801
Q13322	Growth factor receptor-bound protein 10	GRB10	Growth factor receptor-bound protein 10 OS=Homo sapiens OX=9606 GN=GRB10 PE=1 SV=2		0	0	0	0	0	0	802
Q13325	Interferon-induced protein with tetratricopeptide repeats 5	IFIT5	Interferon-induced protein with tetratricopeptide repeats 5 OS=Homo sapiens OX=9606 GN=IFIT5 PE=1 SV=1		0	0	0	0	0	0	803
Q13347	Eukaryotic translation initiation factor 3 subunit I	EIF3I	Eukaryotic translation initiation factor 3 subunit I OS=Homo sapiens OX=9606 GN=EIF3I PE=1 SV=1		0	0	0	0	0	0	804
Q13362;Q15173	Serine/threonine-protein phosphatase 2A 56 kDa regulatory subunit gamma isoform	PPP2R5C	Serine/threonine-protein phosphatase 2A 56 kDa regulatory subunit gamma isoform OS=Homo sapiens OX=9606 GN=PPP2R5C PE=1 SV=3		0	0	0	0	0	0	805
Q13393	Phospholipase D1	PLD1	Phospholipase D1 OS=Homo sapiens OX=9606 GN=PLD1 PE=1 SV=1		0	0	0	0	0	0	806
Q13404;Q15819	Ubiquitin-conjugating enzyme E2 variant 1;Ubiquitin-conjugating enzyme E2 variant 2	UBE2V1;UBE2V2	Ubiquitin-conjugating enzyme E2 variant 1 OS=Homo sapiens OX=9606 GN=UBE2V1 PE=1 SV=2;Ubiquitin-conjugating enzyme E2 variant 2 OS=Homo sapiens OX=9606 GN=UBE2V2 PE=1 SV=4		0	0	0	0	0	0	807
Q13409	Cytoplasmic dynein 1 intermediate chain 2	DYNC1I2	Cytoplasmic dynein 1 intermediate chain 2 OS=Homo sapiens OX=9606 GN=DYNC1I2 PE=1 SV=3		0	0	0	0	0	0	808
Q13415	Origin recognition complex subunit 1	ORC1	Origin recognition complex subunit 1 OS=Homo sapiens OX=9606 GN=ORC1 PE=1 SV=2		0	0	0	0	0	0	809
Q13421	Mesothelin;Megakaryocyte-potentiating factor;Mesothelin, cleaved form	MSLN	Mesothelin OS=Homo sapiens OX=9606 GN=MSLN PE=1 SV=2		0	0	0	0	0	0	810
Q13433	Zinc transporter ZIP6	SLC39A6	Zinc transporter ZIP6 OS=Homo sapiens OX=9606 GN=SLC39A6 PE=1 SV=3		0	0	0	0	0	0	811
Q13435	Splicing factor 3B subunit 2	SF3B2	Splicing factor 3B subunit 2 OS=Homo sapiens OX=9606 GN=SF3B2 PE=1 SV=2		0	0	0	0	0	0	812
Q13442	28 kDa heat- and acid-stable phosphoprotein	PDAP1	28 kDa heat- and acid-stable phosphoprotein OS=Homo sapiens OX=9606 GN=PDAP1 PE=1 SV=1		0	0	0	0	0	0	813
Q13445	Transmembrane emp24 domain-containing protein 1	TMED1	Transmembrane emp24 domain-containing protein 1 OS=Homo sapiens OX=9606 GN=TMED1 PE=1 SV=1		0	0	0	0	0	0	814
Q13459	Unconventional myosin-IXb	MYO9B	Unconventional myosin-IXb OS=Homo sapiens OX=9606 GN=MYO9B PE=1 SV=3		0	0	0	0	0	0	815
Q13491	Neuronal membrane glycoprotein M6-b	GPM6B	Neuronal membrane glycoprotein M6-b OS=Homo sapiens OX=9606 GN=GPM6B PE=1 SV=2		0	0	0	0	0	0	816
Q13501	Sequestosome-1	SQSTM1	Sequestosome-1 OS=Homo sapiens OX=9606 GN=SQSTM1 PE=1 SV=1		0	0	0	0	0	0	817
Q13547	Histone deacetylase 1	HDAC1	Histone deacetylase 1 OS=Homo sapiens OX=9606 GN=HDAC1 PE=1 SV=1		0	0	0	0	0	0	818
Q13586	Stromal interaction molecule 1	STIM1	Stromal interaction molecule 1 OS=Homo sapiens OX=9606 GN=STIM1 PE=1 SV=3		0	0	0	0	0	0	819
Q13596	Sorting nexin-1	SNX1	Sorting nexin-1 OS=Homo sapiens OX=9606 GN=SNX1 PE=1 SV=3		0	0	0	0	0	0	820
Q13616	Cullin-1	CUL1	Cullin-1 OS=Homo sapiens OX=9606 GN=CUL1 PE=1 SV=2		0	0	0	0	0	0	821
Q13617	Cullin-2	CUL2	Cullin-2 OS=Homo sapiens OX=9606 GN=CUL2 PE=1 SV=2		0	0	0	0	0	0	822
Q13618	Cullin-3	CUL3	Cullin-3 OS=Homo sapiens OX=9606 GN=CUL3 PE=1 SV=2		0	0	0	0	0	0	823
Q13619	Cullin-4A	CUL4A	Cullin-4A OS=Homo sapiens OX=9606 GN=CUL4A PE=1 SV=3		0	0	0	0	0	0	824
Q13620	Cullin-4B	CUL4B	Cullin-4B OS=Homo sapiens OX=9606 GN=CUL4B PE=1 SV=4		0	0	0	0	0	0	825
Q13627	Dual specificity tyrosine-phosphorylation-regulated kinase 1A	DYRK1A	Dual specificity tyrosine-phosphorylation-regulated kinase 1A OS=Homo sapiens OX=9606 GN=DYRK1A PE=1 SV=2		0	0	0	0	0	0	826
Q13683	Integrin alpha-7;Integrin alpha-7 heavy chain;Integrin alpha-7 light chain;Integrin alpha-7 70 kDa form	ITGA7	Integrin alpha-7 OS=Homo sapiens OX=9606 GN=ITGA7 PE=1 SV=3		0	0	0	0	0	0	827
Q13769	THO complex subunit 5 homolog	THOC5	THO complex subunit 5 homolog OS=Homo sapiens OX=9606 GN=THOC5 PE=1 SV=2		0	0	0	0	0	0	828
Q13813	Spectrin alpha chain, non-erythrocytic 1	SPTAN1	Spectrin alpha chain, non-erythrocytic 1 OS=Homo sapiens OX=9606 GN=SPTAN1 PE=1 SV=3		0	0	0	0	0	0	829
Q13835	Plakophilin-1	PKP1	Plakophilin-1 OS=Homo sapiens OX=9606 GN=PKP1 PE=1 SV=2		0	0	0	0	0	0	830
Q9BVA1;Q13885	Tubulin beta-2B chain;Tubulin beta-2A chain	TUBB2B;TUBB2A	Tubulin beta-2B chain OS=Homo sapiens OX=9606 GN=TUBB2B PE=1 SV=1;Tubulin beta-2A chain OS=Homo sapiens OX=9606 GN=TUBB2A PE=1 SV=1		0	0	0	0	0	0	831
Q13889	General transcription factor IIH subunit 3	GTF2H3	General transcription factor IIH subunit 3 OS=Homo sapiens OX=9606 GN=GTF2H3 PE=1 SV=2		0	0	0	0	0	0	832
Q13895	Bystin	BYSL	Bystin OS=Homo sapiens OX=9606 GN=BYSL PE=1 SV=3		0	0	0	0	0	0	833
Q13948	Protein CASP	CUX1	Protein CASP OS=Homo sapiens OX=9606 GN=CUX1 PE=1 SV=2		0	0	0	0	0	0	834
Q14139	Ubiquitin conjugation factor E4 A	UBE4A	Ubiquitin conjugation factor E4 A OS=Homo sapiens OX=9606 GN=UBE4A PE=1 SV=2		0	0	0	0	0	0	835
Q14147	Probable ATP-dependent RNA helicase DHX34	DHX34	Probable ATP-dependent RNA helicase DHX34 OS=Homo sapiens OX=9606 GN=DHX34 PE=1 SV=2		0	0	0	0	0	0	836
Q14160	Protein scribble homolog	SCRIB	Protein scribble homolog OS=Homo sapiens OX=9606 GN=SCRIB PE=1 SV=4		0	0	0	0	0	0	837
Q14185	Dedicator of cytokinesis protein 1	DOCK1	Dedicator of cytokinesis protein 1 OS=Homo sapiens OX=9606 GN=DOCK1 PE=1 SV=2		0	0	0	0	0	0	838
Q14202	Zinc finger MYM-type protein 3	ZMYM3	Zinc finger MYM-type protein 3 OS=Homo sapiens OX=9606 GN=ZMYM3 PE=1 SV=2		0	0	0	0	0	0	839
Q14203	Dynactin subunit 1	DCTN1	Dynactin subunit 1 OS=Homo sapiens OX=9606 GN=DCTN1 PE=1 SV=3		0	0	0	0	0	0	840
Q14232	Translation initiation factor eIF-2B subunit alpha	EIF2B1	Translation initiation factor eIF-2B subunit alpha OS=Homo sapiens OX=9606 GN=EIF2B1 PE=1 SV=1		0	0	0	0	0	0	841
Q14320;Q9Y247	Protein FAM50A;Protein FAM50B	FAM50A;FAM50B	Protein FAM50A OS=Homo sapiens OX=9606 GN=FAM50A PE=1 SV=2;Protein FAM50B OS=Homo sapiens OX=9606 GN=FAM50B PE=1 SV=1		0	0	0	0	0	0	842
Q14444	Caprin-1	CAPRIN1	Caprin-1 OS=Homo sapiens OX=9606 GN=CAPRIN1 PE=1 SV=2		0	0	0	0	0	0	843
Q14527	Helicase-like transcription factor	HLTF	Helicase-like transcription factor OS=Homo sapiens OX=9606 GN=HLTF PE=1 SV=2		0	0	0	0	0	0	844
Q14558	Phosphoribosyl pyrophosphate synthase-associated protein 1	PRPSAP1	Phosphoribosyl pyrophosphate synthase-associated protein 1 OS=Homo sapiens OX=9606 GN=PRPSAP1 PE=1 SV=2		0	0	0	0	0	0	845
Q14566	DNA replication licensing factor MCM6	MCM6	DNA replication licensing factor MCM6 OS=Homo sapiens OX=9606 GN=MCM6 PE=1 SV=1		0	0	0	0	0	0	846
Q14571	Inositol 1,4,5-trisphosphate receptor type 2	ITPR2	Inositol 1,4,5-trisphosphate receptor type 2 OS=Homo sapiens OX=9606 GN=ITPR2 PE=1 SV=2		0	0	0	0	0	0	847
Q14642	Type I inositol 1,4,5-trisphosphate 5-phosphatase	INPP5A	Inositol polyphosphate-5-phosphatase A OS=Homo sapiens OX=9606 GN=INPP5A PE=1 SV=1		0	0	0	0	0	0	848
Q14671;Q8TB72	Pumilio homolog 1	PUM1	Pumilio homolog 1 OS=Homo sapiens OX=9606 GN=PUM1 PE=1 SV=3		0	0	0	0	0	0	849
Q14680	Maternal embryonic leucine zipper kinase	MELK	Maternal embryonic leucine zipper kinase OS=Homo sapiens OX=9606 GN=MELK PE=1 SV=3		0	0	0	0	0	0	850
Q14728	Major facilitator superfamily domain-containing protein 10	MFSD10	Major facilitator superfamily domain-containing protein 10 OS=Homo sapiens OX=9606 GN=MFSD10 PE=1 SV=1		0	0	0	0	0	0	851
Q14764	Major vault protein	MVP	Major vault protein OS=Homo sapiens OX=9606 GN=MVP PE=1 SV=4		0	0	0	0	0	0	852
Q14789;REV__Q8N884;Q9NZW5	Golgin subfamily B member 1	GOLGB1	Golgin subfamily B member 1 OS=Homo sapiens OX=9606 GN=GOLGB1 PE=1 SV=2		0	0	0	0	0	0	853
Q147X3	N-alpha-acetyltransferase 30	NAA30	N-alpha-acetyltransferase 30 OS=Homo sapiens OX=9606 GN=NAA30 PE=1 SV=1		0	0	0	0	0	0	854
Q14849	StAR-related lipid transfer protein 3	STARD3	StAR-related lipid transfer protein 3 OS=Homo sapiens OX=9606 GN=STARD3 PE=1 SV=2		0	0	0	0	0	0	855
Q14919	Dr1-associated corepressor	DRAP1	Dr1-associated corepressor OS=Homo sapiens OX=9606 GN=DRAP1 PE=1 SV=3		0	0	0	0	0	0	856
Q14956	Transmembrane glycoprotein NMB	GPNMB	Transmembrane glycoprotein NMB OS=Homo sapiens OX=9606 GN=GPNMB PE=1 SV=2		0	0	0	0	0	0	857
Q14966	Zinc finger protein 638	ZNF638	Zinc finger protein 638 OS=Homo sapiens OX=9606 GN=ZNF638 PE=1 SV=2		0	0	0	0	0	0	858
Q14C86	GTPase-activating protein and VPS9 domain-containing protein 1	GAPVD1	GTPase-activating protein and VPS9 domain-containing protein 1 OS=Homo sapiens OX=9606 GN=GAPVD1 PE=1 SV=2		0	0	0	0	0	0	859
Q14CZ7	FAST kinase domain-containing protein 3	FASTKD3	FAST kinase domain-containing protein 3, mitochondrial OS=Homo sapiens OX=9606 GN=FASTKD3 PE=1 SV=2		0	0	0	0	0	0	860
Q15008	26S proteasome non-ATPase regulatory subunit 6	PSMD6	26S proteasome non-ATPase regulatory subunit 6 OS=Homo sapiens OX=9606 GN=PSMD6 PE=1 SV=1		0	0	0	0	0	0	861
Q15013	MAD2L1-binding protein	MAD2L1BP	MAD2L1-binding protein OS=Homo sapiens OX=9606 GN=MAD2L1BP PE=1 SV=1		0	0	0	0	0	0	862
Q15020	Squamous cell carcinoma antigen recognized by T-cells 3	SART3	Squamous cell carcinoma antigen recognized by T-cells 3 OS=Homo sapiens OX=9606 GN=SART3 PE=1 SV=1		0	0	0	0	0	0	863
Q15021	Condensin complex subunit 1	NCAPD2	Condensin complex subunit 1 OS=Homo sapiens OX=9606 GN=NCAPD2 PE=1 SV=3		0	0	0	0	0	0	864
Q15022	Polycomb protein SUZ12	SUZ12	Polycomb protein SUZ12 OS=Homo sapiens OX=9606 GN=SUZ12 PE=1 SV=3		0	0	0	0	0	0	865
Q15024	Exosome complex component RRP42	EXOSC7	Exosome complex component RRP42 OS=Homo sapiens OX=9606 GN=EXOSC7 PE=1 SV=3		0	0	0	0	0	0	866
Q15056	Eukaryotic translation initiation factor 4H	EIF4H	Eukaryotic translation initiation factor 4H OS=Homo sapiens OX=9606 GN=EIF4H PE=1 SV=5		0	0	0	0	0	0	867
Q15058	Kinesin-like protein KIF14	KIF14	Kinesin-like protein KIF14 OS=Homo sapiens OX=9606 GN=KIF14 PE=1 SV=1		0	0	0	0	0	0	868
Q15118	[Pyruvate dehydrogenase (acetyl-transferring)] kinase isozyme 1, mitochondrial	PDK1	[Pyruvate dehydrogenase (acetyl-transferring)] kinase isozyme 1, mitochondrial OS=Homo sapiens OX=9606 GN=PDK1 PE=1 SV=1		0	0	0	0	0	0	869
Q15120	[Pyruvate dehydrogenase (acetyl-transferring)] kinase isozyme 3, mitochondrial	PDK3	[Pyruvate dehydrogenase (acetyl-transferring)] kinase isozyme 3, mitochondrial OS=Homo sapiens OX=9606 GN=PDK3 PE=1 SV=1		0	0	0	0	0	0	870
Q15208	Serine/threonine-protein kinase 38	STK38	Serine/threonine-protein kinase 38 OS=Homo sapiens OX=9606 GN=STK38 PE=1 SV=1		0	0	0	0	0	0	871
Q15257	Serine/threonine-protein phosphatase 2A activator	PPP2R4	Serine/threonine-protein phosphatase 2A activator OS=Homo sapiens OX=9606 GN=PTPA PE=1 SV=3		0	0	0	0	0	0	872
Q15349	Ribosomal protein S6 kinase alpha-2	RPS6KA2	Ribosomal protein S6 kinase alpha-2 OS=Homo sapiens OX=9606 GN=RPS6KA2 PE=1 SV=2		0	0	0	0	0	0	873
Q15369	Transcription elongation factor B polypeptide 1	TCEB1	Elongin-C OS=Homo sapiens OX=9606 GN=ELOC PE=1 SV=1		0	0	0	0	0	0	874
Q15370	Transcription elongation factor B polypeptide 2	TCEB2	Elongin-B OS=Homo sapiens OX=9606 GN=ELOB PE=1 SV=1		0	0	0	0	0	0	875
Q15427	Splicing factor 3B subunit 4	SF3B4	Splicing factor 3B subunit 4 OS=Homo sapiens OX=9606 GN=SF3B4 PE=1 SV=1		0	0	0	0	0	0	876
Q15428	Splicing factor 3A subunit 2	SF3A2	Splicing factor 3A subunit 2 OS=Homo sapiens OX=9606 GN=SF3A2 PE=1 SV=2		0	0	0	0	0	0	877
Q15477	Helicase SKI2W	SKIV2L	Helicase SKI2W OS=Homo sapiens OX=9606 GN=SKIV2L PE=1 SV=3		0	0	0	0	0	0	878
Q15554	Telomeric repeat-binding factor 2	TERF2	Telomeric repeat-binding factor 2 OS=Homo sapiens OX=9606 GN=TERF2 PE=1 SV=3		0	0	0	0	0	0	879
Q15637	Splicing factor 1	SF1	Splicing factor 1 OS=Homo sapiens OX=9606 GN=SF1 PE=1 SV=4		0	0	0	0	0	0	880
Q15645	Pachytene checkpoint protein 2 homolog	TRIP13	Pachytene checkpoint protein 2 homolog OS=Homo sapiens OX=9606 GN=TRIP13 PE=1 SV=2		0	0	0	0	0	0	881
Q15796	Mothers against decapentaplegic homolog 2	SMAD2	Mothers against decapentaplegic homolog 2 OS=Homo sapiens OX=9606 GN=SMAD2 PE=1 SV=1		0	0	0	0	0	0	882
Q15800	Methylsterol monooxygenase 1	MSMO1	Methylsterol monooxygenase 1 OS=Homo sapiens OX=9606 GN=MSMO1 PE=1 SV=1		0	0	0	0	0	0	883
Q16134	Electron transfer flavoprotein-ubiquinone oxidoreductase, mitochondrial	ETFDH	Electron transfer flavoprotein-ubiquinone oxidoreductase, mitochondrial OS=Homo sapiens OX=9606 GN=ETFDH PE=1 SV=2		0	0	0	0	0	0	884
Q16186	Proteasomal ubiquitin receptor ADRM1	ADRM1	Proteasomal ubiquitin receptor ADRM1 OS=Homo sapiens OX=9606 GN=ADRM1 PE=1 SV=2		0	0	0	0	0	0	885
Q16401	26S proteasome non-ATPase regulatory subunit 5	PSMD5	26S proteasome non-ATPase regulatory subunit 5 OS=Homo sapiens OX=9606 GN=PSMD5 PE=1 SV=3		0	0	0	0	0	0	886
Q16513	Serine/threonine-protein kinase N2	PKN2	Serine/threonine-protein kinase N2 OS=Homo sapiens OX=9606 GN=PKN2 PE=1 SV=1		0	0	0	0	0	0	887
Q16531	DNA damage-binding protein 1	DDB1	DNA damage-binding protein 1 OS=Homo sapiens OX=9606 GN=DDB1 PE=1 SV=1		0	0	0	0	0	0	888
Q16537	Serine/threonine-protein phosphatase 2A 56 kDa regulatory subunit epsilon isoform	PPP2R5E	Serine/threonine-protein phosphatase 2A 56 kDa regulatory subunit epsilon isoform OS=Homo sapiens OX=9606 GN=PPP2R5E PE=1 SV=1		0	0	0	0	0	0	889
Q16560	U11/U12 small nuclear ribonucleoprotein 35 kDa protein	SNRNP35	U11/U12 small nuclear ribonucleoprotein 35 kDa protein OS=Homo sapiens OX=9606 GN=SNRNP35 PE=1 SV=1		0	0	0	0	0	0	890
Q16611	Bcl-2 homologous antagonist/killer	BAK1	Bcl-2 homologous antagonist/killer OS=Homo sapiens OX=9606 GN=BAK1 PE=1 SV=1		0	0	0	0	0	0	891
Q16851	UTP--glucose-1-phosphate uridylyltransferase	UGP2	UTP--glucose-1-phosphate uridylyltransferase OS=Homo sapiens OX=9606 GN=UGP2 PE=1 SV=5		0	0	0	0	0	0	892
Q27J81	Inverted formin-2	INF2	Inverted formin-2 OS=Homo sapiens OX=9606 GN=INF2 PE=1 SV=2		0	0	0	0	0	0	893
Q29983	MHC class I polypeptide-related sequence A	MICA	MHC class I polypeptide-related sequence A OS=Homo sapiens OX=9606 GN=MICA PE=1 SV=1		0	0	0	0	0	0	894
Q2KHR3	Glutamine and serine-rich protein 1	QSER1	Glutamine and serine-rich protein 1 OS=Homo sapiens OX=9606 GN=QSER1 PE=1 SV=3		0	0	0	0	0	0	895
Q2M389	WASH complex subunit 7	KIAA1033	WASH complex subunit 4 OS=Homo sapiens OX=9606 GN=WASHC4 PE=1 SV=2		0	0	0	0	0	0	896
Q2TAA5	GDP-Man:Man(3)GlcNAc(2)-PP-Dol alpha-1,2-mannosyltransferase	ALG11	GDP-Man:Man(3)GlcNAc(2)-PP-Dol alpha-1,2-mannosyltransferase OS=Homo sapiens OX=9606 GN=ALG11 PE=1 SV=2		0	0	0	0	0	0	897
Q2TAL8	Glutamine-rich protein 1	QRICH1	Glutamine-rich protein 1 OS=Homo sapiens OX=9606 GN=QRICH1 PE=1 SV=1		0	0	0	0	0	0	898
Q2TB10	Zinc finger protein 800	ZNF800	Zinc finger protein 800 OS=Homo sapiens OX=9606 GN=ZNF800 PE=1 SV=1		0	0	0	0	0	0	899
Q30201	Hereditary hemochromatosis protein	HFE	Hereditary hemochromatosis protein OS=Homo sapiens OX=9606 GN=HFE PE=1 SV=1		0	0	0	0	0	0	900
Q32P28	Prolyl 3-hydroxylase 1	LEPRE1	Prolyl 3-hydroxylase 1 OS=Homo sapiens OX=9606 GN=P3H1 PE=1 SV=2		0	0	0	0	0	0	901
Q3KR37	GRAM domain-containing protein 1B	GRAMD1B	Protein Aster-B OS=Homo sapiens OX=9606 GN=GRAMD1B PE=1 SV=1		0	0	0	0	0	0	902
Q3ZAQ7	Vacuolar ATPase assembly integral membrane protein VMA21	VMA21	Vacuolar ATPase assembly integral membrane protein VMA21 OS=Homo sapiens OX=9606 GN=VMA21 PE=1 SV=1		0	0	0	0	0	0	903
Q3ZCM7	Tubulin beta-8 chain	TUBB8	Tubulin beta-8 chain OS=Homo sapiens OX=9606 GN=TUBB8 PE=1 SV=2		0	0	0	0	0	0	904
Q460N5	Poly [ADP-ribose] polymerase 14	PARP14	Protein mono-ADP-ribosyltransferase PARP14 OS=Homo sapiens OX=9606 GN=PARP14 PE=1 SV=3		0	0	0	0	0	0	905
Q4G0J3	La-related protein 7	LARP7	La-related protein 7 OS=Homo sapiens OX=9606 GN=LARP7 PE=1 SV=1		0	0	0	0	0	0	906
Q4G176	Acyl-CoA synthetase family member 3, mitochondrial	ACSF3	Malonate--CoA ligase ACSF3, mitochondrial OS=Homo sapiens OX=9606 GN=ACSF3 PE=1 SV=3		0	0	0	0	0	0	907
Q4KMQ1	Taperin	TPRN	Taperin OS=Homo sapiens OX=9606 GN=TPRN PE=1 SV=2		0	0	0	0	0	0	908
Q4KMQ2	Anoctamin-6	ANO6	Anoctamin-6 OS=Homo sapiens OX=9606 GN=ANO6 PE=1 SV=2		0	0	0	0	0	0	909
Q4ZIN3	Membralin	TMEM259	Membralin OS=Homo sapiens OX=9606 GN=TMEM259 PE=1 SV=1		0	0	0	0	0	0	910
Q53EL6	Programmed cell death protein 4	PDCD4	Programmed cell death protein 4 OS=Homo sapiens OX=9606 GN=PDCD4 PE=1 SV=2		0	0	0	0	0	0	911
Q53EP0	Fibronectin type III domain-containing protein 3B	FNDC3B	Fibronectin type III domain-containing protein 3B OS=Homo sapiens OX=9606 GN=FNDC3B PE=1 SV=2		0	0	0	0	0	0	912
Q53EU6	Glycerol-3-phosphate acyltransferase 3	AGPAT9	Glycerol-3-phosphate acyltransferase 3 OS=Homo sapiens OX=9606 GN=GPAT3 PE=1 SV=2		0	0	0	0	0	0	913
Q53FT3	Protein Hikeshi	C11orf73	Protein Hikeshi OS=Homo sapiens OX=9606 GN=HIKESHI PE=1 SV=2		0	0	0	0	0	0	914
Q53GS7	Nucleoporin GLE1	GLE1	Nucleoporin GLE1 OS=Homo sapiens OX=9606 GN=GLE1 PE=1 SV=2		0	0	0	0	0	0	915
Q562F6	Shugoshin-like 2	SGOL2	Shugoshin 2 OS=Homo sapiens OX=9606 GN=SGO2 PE=1 SV=2		0	0	0	0	0	0	916
Q562R1	Beta-actin-like protein 2	ACTBL2	Beta-actin-like protein 2 OS=Homo sapiens OX=9606 GN=ACTBL2 PE=1 SV=2		0	0	0	0	0	0	917
Q567U6	Coiled-coil domain-containing protein 93	CCDC93	Coiled-coil domain-containing protein 93 OS=Homo sapiens OX=9606 GN=CCDC93 PE=1 SV=2		0	0	0	0	0	0	918
Q5BJD5	Transmembrane protein 41B	TMEM41B	Transmembrane protein 41B OS=Homo sapiens OX=9606 GN=TMEM41B PE=1 SV=1		0	0	0	0	0	0	919
Q5BJH2	Transmembrane protein 128	TMEM128	Transmembrane protein 128 OS=Homo sapiens OX=9606 GN=TMEM128 PE=1 SV=2		0	0	0	0	0	0	920
Q5I7T1;Q5BKT4	Putative Dol-P-Glc:Glc(2)Man(9)GlcNAc(2)-PP-Dol alpha-1,2-glucosyltransferase;Dol-P-Glc:Glc(2)Man(9)GlcNAc(2)-PP-Dol alpha-1,2-glucosyltransferase	ALG10B;ALG10	Putative Dol-P-Glc:Glc(2)Man(9)GlcNAc(2)-PP-Dol alpha-1,2-glucosyltransferase OS=Homo sapiens OX=9606 GN=ALG10B PE=1 SV=2;Dol-P-Glc:Glc(2)Man(9)GlcNAc(2)-PP-Dol alpha-1,2-glucosyltransferase OS=Homo sapiens OX=9606 GN=ALG10 PE=2 SV=1		0	0	0	0	0	0	921
Q5EB52	Mesoderm-specific transcript homolog protein	MEST	Mesoderm-specific transcript homolog protein OS=Homo sapiens OX=9606 GN=MEST PE=2 SV=2		0	0	0	0	0	0	922
Q5H8A4	GPI ethanolamine phosphate transferase 2	PIGG	GPI ethanolamine phosphate transferase 2 OS=Homo sapiens OX=9606 GN=PIGG PE=1 SV=1		0	0	0	0	0	0	923
Q5JUR7	Testis-expressed sequence 30 protein	TEX30	Testis-expressed protein 30 OS=Homo sapiens OX=9606 GN=TEX30 PE=2 SV=1		0	0	0	0	0	0	924
Q5JVF3	PCI domain-containing protein 2	PCID2	PCI domain-containing protein 2 OS=Homo sapiens OX=9606 GN=PCID2 PE=1 SV=2		0	0	0	0	0	0	925
Q5M7Z0	RING finger and transmembrane domain-containing protein 1	RNFT1	E3 ubiquitin-protein ligase RNFT1 OS=Homo sapiens OX=9606 GN=RNFT1 PE=1 SV=2		0	0	0	0	0	0	926
Q5SGD2	Protein phosphatase 1L	PPM1L	Protein phosphatase 1L OS=Homo sapiens OX=9606 GN=PPM1L PE=1 SV=1		0	0	0	0	0	0	927
Q5SNT2	Transmembrane protein 201	TMEM201	Transmembrane protein 201 OS=Homo sapiens OX=9606 GN=TMEM201 PE=1 SV=1		0	0	0	0	0	0	928
Q5SRI9	Glycoprotein endo-alpha-1,2-mannosidase	MANEA	Glycoprotein endo-alpha-1,2-mannosidase OS=Homo sapiens OX=9606 GN=MANEA PE=1 SV=1		0	0	0	0	0	0	929
Q5SWX8	Protein odr-4 homolog	ODR4	Protein odr-4 homolog OS=Homo sapiens OX=9606 GN=ODR4 PE=1 SV=1		0	0	0	0	0	0	930
Q5T3F8	CSC1-like protein 2	TMEM63B	CSC1-like protein 2 OS=Homo sapiens OX=9606 GN=TMEM63B PE=1 SV=1		0	0	0	0	0	0	931
Q5T4S7	E3 ubiquitin-protein ligase UBR4	UBR4	E3 ubiquitin-protein ligase UBR4 OS=Homo sapiens OX=9606 GN=UBR4 PE=1 SV=1		0	0	0	0	0	0	932
Q5T5C0	Syntaxin-binding protein 5	STXBP5	Syntaxin-binding protein 5 OS=Homo sapiens OX=9606 GN=STXBP5 PE=1 SV=1		0	0	0	0	0	0	933
Q5T6F0;Q5VW00	DDB1- and CUL4-associated factor 12;DDB1- and CUL4-associated factor 12-like protein 2	DCAF12;DCAF12L2	DDB1- and CUL4-associated factor 12 OS=Homo sapiens OX=9606 GN=DCAF12 PE=1 SV=1;DDB1- and CUL4-associated factor 12-like protein 2 OS=Homo sapiens OX=9606 GN=DCAF12L2 PE=2 SV=1		0	0	0	0	0	0	934
Q5T6F2	Ubiquitin-associated protein 2	UBAP2	Ubiquitin-associated protein 2 OS=Homo sapiens OX=9606 GN=UBAP2 PE=1 SV=1		0	0	0	0	0	0	935
Q5T750	Skin-specific protein 32	XP32	Skin-specific protein 32 OS=Homo sapiens OX=9606 GN=XP32 PE=1 SV=1		0	0	0	0	0	0	936
Q5T8D3	Acyl-CoA-binding domain-containing protein 5	ACBD5	Acyl-CoA-binding domain-containing protein 5 OS=Homo sapiens OX=9606 GN=ACBD5 PE=1 SV=1		0	0	0	0	0	0	937
Q5TA45	Integrator complex subunit 11	CPSF3L	Integrator complex subunit 11 OS=Homo sapiens OX=9606 GN=INTS11 PE=1 SV=2		0	0	0	0	0	0	938
Q5TBB1	Ribonuclease H2 subunit B	RNASEH2B	Ribonuclease H2 subunit B OS=Homo sapiens OX=9606 GN=RNASEH2B PE=1 SV=1		0	0	0	0	0	0	939
Q5TKA1	Protein lin-9 homolog	LIN9	Protein lin-9 homolog OS=Homo sapiens OX=9606 GN=LIN9 PE=1 SV=1		0	0	0	0	0	0	940
Q5UIP0	Telomere-associated protein RIF1	RIF1	Telomere-associated protein RIF1 OS=Homo sapiens OX=9606 GN=RIF1 PE=1 SV=2		0	0	0	0	0	0	941
Q5VIR6	Vacuolar protein sorting-associated protein 53 homolog	VPS53	Vacuolar protein sorting-associated protein 53 homolog OS=Homo sapiens OX=9606 GN=VPS53 PE=1 SV=1		0	0	0	0	0	0	942
Q5VST6	Alpha/beta hydrolase domain-containing protein 17B	ABHD17B	Alpha/beta hydrolase domain-containing protein 17B OS=Homo sapiens OX=9606 GN=ABHD17B PE=1 SV=1		0	0	0	0	0	0	943
Q5VTE6	Protein angel homolog 2	ANGEL2	Protein angel homolog 2 OS=Homo sapiens OX=9606 GN=ANGEL2 PE=2 SV=1		0	0	0	0	0	0	944
Q5VV42	Threonylcarbamoyladenosine tRNA methylthiotransferase	CDKAL1	Threonylcarbamoyladenosine tRNA methylthiotransferase OS=Homo sapiens OX=9606 GN=CDKAL1 PE=1 SV=1		0	0	0	0	0	0	945
Q5VW36	Focadhesin	FOCAD	Focadhesin OS=Homo sapiens OX=9606 GN=FOCAD PE=1 SV=1		0	0	0	0	0	0	946
Q5VWQ8	Disabled homolog 2-interacting protein	DAB2IP	Disabled homolog 2-interacting protein OS=Homo sapiens OX=9606 GN=DAB2IP PE=1 SV=2		0	0	0	0	0	0	947
Q5VYK3	Proteasome-associated protein ECM29 homolog	ECM29	Proteasome adapter and scaffold protein ECM29 OS=Homo sapiens OX=9606 GN=ECPAS PE=1 SV=2		0	0	0	0	0	0	948
Q5VYS8	Terminal uridylyltransferase 7	ZCCHC6	Terminal uridylyltransferase 7 OS=Homo sapiens OX=9606 GN=TUT7 PE=1 SV=1		0	0	0	0	0	0	949
Q5VZ89	DENN domain-containing protein 4C	DENND4C	DENN domain-containing protein 4C OS=Homo sapiens OX=9606 GN=DENND4C PE=1 SV=3		0	0	0	0	0	0	950
Q5VZE5	N-alpha-acetyltransferase 35, NatC auxiliary subunit	NAA35	N-alpha-acetyltransferase 35, NatC auxiliary subunit OS=Homo sapiens OX=9606 GN=NAA35 PE=1 SV=1		0	0	0	0	0	0	951
Q5VZK9	Leucine-rich repeat-containing protein 16A	LRRC16A	F-actin-uncapping protein LRRC16A OS=Homo sapiens OX=9606 GN=CARMIL1 PE=1 SV=1		0	0	0	0	0	0	952
Q63HN8	E3 ubiquitin-protein ligase RNF213	RNF213	E3 ubiquitin-protein ligase RNF213 OS=Homo sapiens OX=9606 GN=RNF213 PE=1 SV=3		0	0	0	0	0	0	953
Q63HQ0	AP-1 complex-associated regulatory protein	AP1AR	AP-1 complex-associated regulatory protein OS=Homo sapiens OX=9606 GN=AP1AR PE=1 SV=1		0	0	0	0	0	0	954
Q643R3	Lysophospholipid acyltransferase LPCAT4	LPCAT4	Lysophospholipid acyltransferase LPCAT4 OS=Homo sapiens OX=9606 GN=LPCAT4 PE=1 SV=1		0	0	0	0	0	0	955
Q64LD2	WD repeat-containing protein 25	WDR25	WD repeat-containing protein 25 OS=Homo sapiens OX=9606 GN=WDR25 PE=1 SV=3		0	0	0	0	0	0	956
Q658Y4	Protein FAM91A1	FAM91A1	Protein FAM91A1 OS=Homo sapiens OX=9606 GN=FAM91A1 PE=1 SV=3		0	0	0	0	0	0	957
Q659A1	Little elongation complex subunit 2	ICE2	Little elongation complex subunit 2 OS=Homo sapiens OX=9606 GN=ICE2 PE=1 SV=2		0	0	0	0	0	0	958
Q66K74	Microtubule-associated protein 1S;MAP1S heavy chain;MAP1S light chain	MAP1S	Microtubule-associated protein 1S OS=Homo sapiens OX=9606 GN=MAP1S PE=1 SV=2		0	0	0	0	0	0	959
Q68E01	Integrator complex subunit 3	INTS3	Integrator complex subunit 3 OS=Homo sapiens OX=9606 GN=INTS3 PE=1 SV=1		0	0	0	0	0	0	960
Q68EM7	Rho GTPase-activating protein 17	ARHGAP17	Rho GTPase-activating protein 17 OS=Homo sapiens OX=9606 GN=ARHGAP17 PE=1 SV=1		0	0	0	0	0	0	961
Q69YN2	CWF19-like protein 1	CWF19L1	CWF19-like protein 1 OS=Homo sapiens OX=9606 GN=CWF19L1 PE=1 SV=2		0	0	0	0	0	0	962
Q6DCA0	AMMECR1-like protein	AMMECR1L	AMMECR1-like protein OS=Homo sapiens OX=9606 GN=AMMECR1L PE=1 SV=1		0	0	0	0	0	0	963
Q6DN90	IQ motif and SEC7 domain-containing protein 1	IQSEC1	IQ motif and SEC7 domain-containing protein 1 OS=Homo sapiens OX=9606 GN=IQSEC1 PE=1 SV=1		0	0	0	0	0	0	964
Q6IQ21	Zinc finger protein 770	ZNF770	Zinc finger protein 770 OS=Homo sapiens OX=9606 GN=ZNF770 PE=1 SV=1		0	0	0	0	0	0	965
Q6IQ22	Ras-related protein Rab-12	RAB12	Ras-related protein Rab-12 OS=Homo sapiens OX=9606 GN=RAB12 PE=1 SV=3		0	0	0	0	0	0	966
Q6KC79	Nipped-B-like protein	NIPBL	Nipped-B-like protein OS=Homo sapiens OX=9606 GN=NIPBL PE=1 SV=2		0	0	0	0	0	0	967
Q9BV35;Q6KCM7	Calcium-binding mitochondrial carrier protein SCaMC-3;Calcium-binding mitochondrial carrier protein SCaMC-2	SLC25A23;SLC25A25	Calcium-binding mitochondrial carrier protein SCaMC-3 OS=Homo sapiens OX=9606 GN=SLC25A23 PE=1 SV=2;Calcium-binding mitochondrial carrier protein SCaMC-2 OS=Homo sapiens OX=9606 GN=SLC25A25 PE=1 SV=1		0	0	0	0	0	0	968
Q6MZQ0	Proline-rich protein 5-like	PRR5L	Proline-rich protein 5-like OS=Homo sapiens OX=9606 GN=PRR5L PE=1 SV=2		0	0	0	0	0	0	969
Q6N075	Molybdate-anion transporter	MFSD5	Molybdate-anion transporter OS=Homo sapiens OX=9606 GN=MFSD5 PE=1 SV=2		0	0	0	0	0	0	970
Q6NS38	Alpha-ketoglutarate-dependent dioxygenase alkB homolog 2	ALKBH2	DNA oxidative demethylase ALKBH2 OS=Homo sapiens OX=9606 GN=ALKBH2 PE=1 SV=1		0	0	0	0	0	0	971
Q6NTF9	Rhomboid domain-containing protein 2	RHBDD2	Rhomboid domain-containing protein 2 OS=Homo sapiens OX=9606 GN=RHBDD2 PE=2 SV=2		0	0	0	0	0	0	972
Q6NUT3	Major facilitator superfamily domain-containing protein 12	MFSD12	Major facilitator superfamily domain-containing protein 12 OS=Homo sapiens OX=9606 GN=MFSD12 PE=1 SV=2		0	0	0	0	0	0	973
Q6NXR4	TELO2-interacting protein 2	TTI2	TELO2-interacting protein 2 OS=Homo sapiens OX=9606 GN=TTI2 PE=1 SV=1		0	0	0	0	0	0	974
Q6NXT4	Zinc transporter 6	SLC30A6	Zinc transporter 6 OS=Homo sapiens OX=9606 GN=SLC30A6 PE=1 SV=2		0	0	0	0	0	0	975
Q6NYC1	Bifunctional arginine demethylase and lysyl-hydroxylase JMJD6	JMJD6	Bifunctional arginine demethylase and lysyl-hydroxylase JMJD6 OS=Homo sapiens OX=9606 GN=JMJD6 PE=1 SV=1		0	0	0	0	0	0	976
Q6NZ67;Q6P582	Mitotic-spindle organizing protein 2B;Mitotic-spindle organizing protein 2A	MZT2B;MZT2A	Mitotic-spindle organizing protein 2B OS=Homo sapiens OX=9606 GN=MZT2B PE=1 SV=1;Mitotic-spindle organizing protein 2A OS=Homo sapiens OX=9606 GN=MZT2A PE=1 SV=2		0	0	0	0	0	0	977
Q6P087	RNA pseudouridylate synthase domain-containing protein 3	RPUSD3	Mitochondrial mRNA pseudouridine synthase RPUSD3 OS=Homo sapiens OX=9606 GN=RPUSD3 PE=1 SV=3		0	0	0	0	0	0	978
Q6P158	Putative ATP-dependent RNA helicase DHX57	DHX57	Putative ATP-dependent RNA helicase DHX57 OS=Homo sapiens OX=9606 GN=DHX57 PE=1 SV=2		0	0	0	0	0	0	979
Q6P1N0	Coiled-coil and C2 domain-containing protein 1A	CC2D1A	Coiled-coil and C2 domain-containing protein 1A OS=Homo sapiens OX=9606 GN=CC2D1A PE=1 SV=1		0	0	0	0	0	0	980
Q6P2C8	Mediator of RNA polymerase II transcription subunit 27	MED27	Mediator of RNA polymerase II transcription subunit 27 OS=Homo sapiens OX=9606 GN=MED27 PE=1 SV=1		0	0	0	0	0	0	981
Q6P2E9	Enhancer of mRNA-decapping protein 4	EDC4	Enhancer of mRNA-decapping protein 4 OS=Homo sapiens OX=9606 GN=EDC4 PE=1 SV=1		0	0	0	0	0	0	982
Q6P5R6	60S ribosomal protein L22-like 1	RPL22L1	60S ribosomal protein L22-like 1 OS=Homo sapiens OX=9606 GN=RPL22L1 PE=1 SV=2		0	0	0	0	0	0	983
Q6P6C2	RNA demethylase ALKBH5	ALKBH5	RNA demethylase ALKBH5 OS=Homo sapiens OX=9606 GN=ALKBH5 PE=1 SV=2		0	0	0	0	0	0	984
Q6P9F7	Volume-regulated anion channel subunit LRRC8B	LRRC8B	Volume-regulated anion channel subunit LRRC8B OS=Homo sapiens OX=9606 GN=LRRC8B PE=1 SV=2		0	0	0	0	0	0	985
Q6PCB7	Long-chain fatty acid transport protein 1	SLC27A1	Long-chain fatty acid transport protein 1 OS=Homo sapiens OX=9606 GN=SLC27A1 PE=1 SV=1		0	0	0	0	0	0	986
Q6PD62	RNA polymerase-associated protein CTR9 homolog	CTR9	RNA polymerase-associated protein CTR9 homolog OS=Homo sapiens OX=9606 GN=CTR9 PE=1 SV=1		0	0	0	0	0	0	987
Q6PI48	Aspartate--tRNA ligase, mitochondrial	DARS2	Aspartate--tRNA ligase, mitochondrial OS=Homo sapiens OX=9606 GN=DARS2 PE=1 SV=1		0	0	0	0	0	0	988
Q6PI78	Transmembrane protein 65	TMEM65	Transmembrane protein 65 OS=Homo sapiens OX=9606 GN=TMEM65 PE=1 SV=2		0	0	0	0	0	0	989
Q6PJI9	WD repeat-containing protein 59	WDR59	GATOR complex protein WDR59 OS=Homo sapiens OX=9606 GN=WDR59 PE=1 SV=2		0	0	0	0	0	0	990
Q6PJP8	DNA cross-link repair 1A protein	DCLRE1A	DNA cross-link repair 1A protein OS=Homo sapiens OX=9606 GN=DCLRE1A PE=1 SV=3		0	0	0	0	0	0	991
Q6PK18	2-oxoglutarate and iron-dependent oxygenase domain-containing protein 3	OGFOD3	2-oxoglutarate and iron-dependent oxygenase domain-containing protein 3 OS=Homo sapiens OX=9606 GN=OGFOD3 PE=1 SV=2		0	0	0	0	0	0	992
Q6R327	Rapamycin-insensitive companion of mTOR	RICTOR	Rapamycin-insensitive companion of mTOR OS=Homo sapiens OX=9606 GN=RICTOR PE=1 SV=1		0	0	0	0	0	0	993
Q6UW56	All-trans retinoic acid-induced differentiation factor	ATRAID	All-trans retinoic acid-induced differentiation factor OS=Homo sapiens OX=9606 GN=ATRAID PE=1 SV=2		0	0	0	0	0	0	994
Q6UW63	KDEL motif-containing protein 1	KDELC1	Protein O-glucosyltransferase 2 OS=Homo sapiens OX=9606 GN=POGLUT2 PE=1 SV=1		0	0	0	0	0	0	995
Q6UWH6	Protein TEX261	TEX261	Protein TEX261 OS=Homo sapiens OX=9606 GN=TEX261 PE=2 SV=1		0	0	0	0	0	0	996
Q6UWJ1	Transmembrane and coiled-coil domain-containing protein 3	TMCO3	Transmembrane and coiled-coil domain-containing protein 3 OS=Homo sapiens OX=9606 GN=TMCO3 PE=1 SV=1		0	0	0	0	0	0	997
Q6UX71	Plexin domain-containing protein 2	PLXDC2	Plexin domain-containing protein 2 OS=Homo sapiens OX=9606 GN=PLXDC2 PE=1 SV=1		0	0	0	0	0	0	998
Q6VY07	Phosphofurin acidic cluster sorting protein 1	PACS1	Phosphofurin acidic cluster sorting protein 1 OS=Homo sapiens OX=9606 GN=PACS1 PE=1 SV=2		0	0	0	0	0	0	999
Q6WKZ4;Q7L804	Rab11 family-interacting protein 1	RAB11FIP1	Rab11 family-interacting protein 1 OS=Homo sapiens OX=9606 GN=RAB11FIP1 PE=1 SV=3		0	0	0	0	0	0	1000
Q6WRI0	Immunoglobulin superfamily member 10	IGSF10	Immunoglobulin superfamily member 10 OS=Homo sapiens OX=9606 GN=IGSF10 PE=1 SV=1		0	0	0	0	0	0	1001
Q6Y288	Beta-1,3-glucosyltransferase	B3GALTL	Beta-1,3-glucosyltransferase OS=Homo sapiens OX=9606 GN=B3GLCT PE=1 SV=2		0	0	0	0	0	0	1002
Q6ZMG9	Ceramide synthase 6	CERS6	Ceramide synthase 6 OS=Homo sapiens OX=9606 GN=CERS6 PE=1 SV=1		0	0	0	0	0	0	1003
Q6ZMU1	Putative protein C3P1	C3P1	Putative protein C3P1 OS=Homo sapiens OX=9606 GN=C3P1 PE=5 SV=3		0	0	0	0	0	0	1004
Q6ZRP7	Sulfhydryl oxidase 2	QSOX2	Sulfhydryl oxidase 2 OS=Homo sapiens OX=9606 GN=QSOX2 PE=1 SV=3		0	0	0	0	0	0	1005
Q6ZT21	Transmembrane protein with metallophosphoesterase domain	TMPPE	Transmembrane protein with metallophosphoesterase domain OS=Homo sapiens OX=9606 GN=TMPPE PE=2 SV=2		0	0	0	0	0	0	1006
Q6ZUT9;Q6IQ26	DENN domain-containing protein 5B;DENN domain-containing protein 5A	DENND5B;DENND5A	DENN domain-containing protein 5B OS=Homo sapiens OX=9606 GN=DENND5B PE=1 SV=2;DENN domain-containing protein 5A OS=Homo sapiens OX=9606 GN=DENND5A PE=1 SV=2		0	0	0	0	0	0	1007
Q6ZUX7	Lipoma HMGIC fusion partner-like 2 protein	LHFPL2	LHFPL tetraspan subfamily member 2 protein OS=Homo sapiens OX=9606 GN=LHFPL2 PE=2 SV=2		0	0	0	0	0	0	1008
Q6ZV73	FYVE, RhoGEF and PH domain-containing protein 6	FGD6	FYVE, RhoGEF and PH domain-containing protein 6 OS=Homo sapiens OX=9606 GN=FGD6 PE=1 SV=2		0	0	0	0	0	0	1009
Q6ZW31	Rho GTPase-activating protein SYDE1	SYDE1	Rho GTPase-activating protein SYDE1 OS=Homo sapiens OX=9606 GN=SYDE1 PE=1 SV=1		0	0	0	0	0	0	1010
Q6ZYL4	General transcription factor IIH subunit 5	GTF2H5	General transcription factor IIH subunit 5 OS=Homo sapiens OX=9606 GN=GTF2H5 PE=1 SV=1		0	0	0	0	0	0	1011
Q709C8	Vacuolar protein sorting-associated protein 13C	VPS13C	Vacuolar protein sorting-associated protein 13C OS=Homo sapiens OX=9606 GN=VPS13C PE=1 SV=1		0	0	0	0	0	0	1012
Q70J99	Protein unc-13 homolog D	UNC13D	Protein unc-13 homolog D OS=Homo sapiens OX=9606 GN=UNC13D PE=1 SV=1		0	0	0	0	0	0	1013
Q70JA7	Chondroitin sulfate synthase 3	CHSY3	Chondroitin sulfate synthase 3 OS=Homo sapiens OX=9606 GN=CHSY3 PE=2 SV=3		0	0	0	0	0	0	1014
Q71RG4	Transmembrane and ubiquitin-like domain-containing protein 2	TMUB2	Transmembrane and ubiquitin-like domain-containing protein 2 OS=Homo sapiens OX=9606 GN=TMUB2 PE=1 SV=2		0	0	0	0	0	0	1015
Q7KYR7	Butyrophilin subfamily 2 member A1	BTN2A1	Butyrophilin subfamily 2 member A1 OS=Homo sapiens OX=9606 GN=BTN2A1 PE=1 SV=3		0	0	0	0	0	0	1016
Q7KZI7	Serine/threonine-protein kinase MARK2	MARK2	Serine/threonine-protein kinase MARK2 OS=Homo sapiens OX=9606 GN=MARK2 PE=1 SV=2		0	0	0	0	0	0	1017
Q7L1W4	Volume-regulated anion channel subunit LRRC8D	LRRC8D	Volume-regulated anion channel subunit LRRC8D OS=Homo sapiens OX=9606 GN=LRRC8D PE=1 SV=1		0	0	0	0	0	0	1018
Q7L211	Alpha/beta hydrolase domain-containing protein 13	ABHD13	Protein ABHD13 OS=Homo sapiens OX=9606 GN=ABHD13 PE=2 SV=1		0	0	0	0	0	0	1019
Q7L2H7	Eukaryotic translation initiation factor 3 subunit M	EIF3M	Eukaryotic translation initiation factor 3 subunit M OS=Homo sapiens OX=9606 GN=EIF3M PE=1 SV=1		0	0	0	0	0	0	1020
Q7L2J0	7SK snRNA methylphosphate capping enzyme	MEPCE	7SK snRNA methylphosphate capping enzyme OS=Homo sapiens OX=9606 GN=MEPCE PE=1 SV=1		0	0	0	0	0	0	1021
Q7L311	Armadillo repeat-containing X-linked protein 2	ARMCX2	Armadillo repeat-containing X-linked protein 2 OS=Homo sapiens OX=9606 GN=ARMCX2 PE=2 SV=1		0	0	0	0	0	0	1022
Q7L523;Q5VZM2	Ras-related GTP-binding protein A;Ras-related GTP-binding protein B	RRAGA;RRAGB	Ras-related GTP-binding protein A OS=Homo sapiens OX=9606 GN=RRAGA PE=1 SV=1;Ras-related GTP-binding protein B OS=Homo sapiens OX=9606 GN=RRAGB PE=1 SV=1		0	0	0	0	0	0	1023
Q7L592	NADH dehydrogenase [ubiquinone] complex I, assembly factor 7	NDUFAF7	Protein arginine methyltransferase NDUFAF7, mitochondrial OS=Homo sapiens OX=9606 GN=NDUFAF7 PE=1 SV=1		0	0	0	0	0	0	1024
Q7L5N7	Lysophosphatidylcholine acyltransferase 2	LPCAT2	Lysophosphatidylcholine acyltransferase 2 OS=Homo sapiens OX=9606 GN=LPCAT2 PE=1 SV=1		0	0	0	0	0	0	1025
Q9H8S9;Q7L9L4	MOB kinase activator 1A;MOB kinase activator 1B	MOB1A;MOB1B	MOB kinase activator 1A OS=Homo sapiens OX=9606 GN=MOB1A PE=1 SV=4;MOB kinase activator 1B OS=Homo sapiens OX=9606 GN=MOB1B PE=1 SV=3		0	0	0	0	0	0	1026
Q7RTV0	PHD finger-like domain-containing protein 5A	PHF5A	PHD finger-like domain-containing protein 5A OS=Homo sapiens OX=9606 GN=PHF5A PE=1 SV=1		0	0	0	0	0	0	1027
Q7Z2T5	TRMT1-like protein	TRMT1L	TRMT1-like protein OS=Homo sapiens OX=9606 GN=TRMT1L PE=1 SV=2		0	0	0	0	0	0	1028
Q7Z2Z2	Elongation factor Tu GTP-binding domain-containing protein 1	EFTUD1	Elongation factor-like GTPase 1 OS=Homo sapiens OX=9606 GN=EFL1 PE=1 SV=2		0	0	0	0	0	0	1029
Q7Z333	Probable helicase senataxin	SETX	Probable helicase senataxin OS=Homo sapiens OX=9606 GN=SETX PE=1 SV=4		0	0	0	0	0	0	1030
Q7Z3C6	Autophagy-related protein 9A	ATG9A	Autophagy-related protein 9A OS=Homo sapiens OX=9606 GN=ATG9A PE=1 SV=3		0	0	0	0	0	0	1031
Q7Z3J2	UPF0505 protein C16orf62	C16orf62	VPS35 endosomal protein sorting factor-like OS=Homo sapiens OX=9606 GN=VPS35L PE=1 SV=2		0	0	0	0	0	0	1032
Q7Z460	CLIP-associating protein 1	CLASP1	CLIP-associating protein 1 OS=Homo sapiens OX=9606 GN=CLASP1 PE=1 SV=1		0	0	0	0	0	0	1033
Q7Z478	ATP-dependent RNA helicase DHX29	DHX29	ATP-dependent RNA helicase DHX29 OS=Homo sapiens OX=9606 GN=DHX29 PE=1 SV=2		0	0	0	0	0	0	1034
Q7Z4F1	Low-density lipoprotein receptor-related protein 10	LRP10	Low-density lipoprotein receptor-related protein 10 OS=Homo sapiens OX=9606 GN=LRP10 PE=1 SV=2		0	0	0	0	0	0	1035
Q7Z4G4	tRNA (guanine(10)-N2)-methyltransferase homolog	TRMT11	tRNA (guanine(10)-N2)-methyltransferase homolog OS=Homo sapiens OX=9606 GN=TRMT11 PE=1 SV=1		0	0	0	0	0	0	1036
Q7Z4H7	HAUS augmin-like complex subunit 6	HAUS6	HAUS augmin-like complex subunit 6 OS=Homo sapiens OX=9606 GN=HAUS6 PE=1 SV=2		0	0	0	0	0	0	1037
Q7Z6Z7	E3 ubiquitin-protein ligase HUWE1	HUWE1	E3 ubiquitin-protein ligase HUWE1 OS=Homo sapiens OX=9606 GN=HUWE1 PE=1 SV=3		0	0	0	0	0	0	1038
Q7Z739	YTH domain-containing family protein 3	YTHDF3	YTH domain-containing family protein 3 OS=Homo sapiens OX=9606 GN=YTHDF3 PE=1 SV=1		0	0	0	0	0	0	1039
Q7Z7A4	PX domain-containing protein kinase-like protein	PXK	PX domain-containing protein kinase-like protein OS=Homo sapiens OX=9606 GN=PXK PE=1 SV=1		0	0	0	0	0	0	1040
Q7Z7H8	39S ribosomal protein L10, mitochondrial	MRPL10	39S ribosomal protein L10, mitochondrial OS=Homo sapiens OX=9606 GN=MRPL10 PE=1 SV=3		0	0	0	0	0	0	1041
Q7Z7N9	Transmembrane protein 179B	TMEM179B	Transmembrane protein 179B OS=Homo sapiens OX=9606 GN=TMEM179B PE=1 SV=1		0	0	0	0	0	0	1042
Q86SK9	Stearoyl-CoA desaturase 5	SCD5	Stearoyl-CoA desaturase 5 OS=Homo sapiens OX=9606 GN=SCD5 PE=1 SV=2		0	0	0	0	0	0	1043
Q86SR1;Q49A17	Polypeptide N-acetylgalactosaminyltransferase 10	GALNT10	Polypeptide N-acetylgalactosaminyltransferase 10 OS=Homo sapiens OX=9606 GN=GALNT10 PE=1 SV=2		0	0	0	0	0	0	1044
Q86SZ2	Trafficking protein particle complex subunit 6B	TRAPPC6B	Trafficking protein particle complex subunit 6B OS=Homo sapiens OX=9606 GN=TRAPPC6B PE=1 SV=1		0	0	0	0	0	0	1045
Q86TB9	Protein PAT1 homolog 1	PATL1	Protein PAT1 homolog 1 OS=Homo sapiens OX=9606 GN=PATL1 PE=1 SV=2		0	0	0	0	0	0	1046
Q86TN4	tRNA 2-phosphotransferase 1	TRPT1	tRNA 2-phosphotransferase 1 OS=Homo sapiens OX=9606 GN=TRPT1 PE=1 SV=2		0	0	0	0	0	0	1047
Q86U86	Protein polybromo-1	PBRM1	Protein polybromo-1 OS=Homo sapiens OX=9606 GN=PBRM1 PE=1 SV=1		0	0	0	0	0	0	1048
Q86UV5	Ubiquitin carboxyl-terminal hydrolase 48	USP48	Ubiquitin carboxyl-terminal hydrolase 48 OS=Homo sapiens OX=9606 GN=USP48 PE=1 SV=1		0	0	0	0	0	0	1049
Q86V85	Integral membrane protein GPR180	GPR180	Integral membrane protein GPR180 OS=Homo sapiens OX=9606 GN=GPR180 PE=2 SV=1		0	0	0	0	0	0	1050
Q86VI3	Ras GTPase-activating-like protein IQGAP3	IQGAP3	Ras GTPase-activating-like protein IQGAP3 OS=Homo sapiens OX=9606 GN=IQGAP3 PE=1 SV=2		0	0	0	0	0	0	1051
Q86VI4	Lysosomal-associated transmembrane protein 4B	LAPTM4B	Lysosomal-associated transmembrane protein 4B OS=Homo sapiens OX=9606 GN=LAPTM4B PE=1 SV=2		0	0	0	0	0	0	1052
Q86VR2	Protein FAM134C	FAM134C	Reticulophagy regulator 3 OS=Homo sapiens OX=9606 GN=RETREG3 PE=1 SV=1		0	0	0	0	0	0	1053
Q86VV8	Rotatin	RTTN	Rotatin OS=Homo sapiens OX=9606 GN=RTTN PE=1 SV=3		0	0	0	0	0	0	1054
Q86VX2	COMM domain-containing protein 7	COMMD7	COMM domain-containing protein 7 OS=Homo sapiens OX=9606 GN=COMMD7 PE=1 SV=2		0	0	0	0	0	0	1055
Q86VZ4	Low-density lipoprotein receptor-related protein 11	LRP11	Low-density lipoprotein receptor-related protein 11 OS=Homo sapiens OX=9606 GN=LRP11 PE=2 SV=2		0	0	0	0	0	0	1056
Q86W33	Transmembrane protein adipocyte-associated 1	TPRA1	Transmembrane protein adipocyte-associated 1 OS=Homo sapiens OX=9606 GN=TPRA1 PE=1 SV=1		0	0	0	0	0	0	1057
Q86W50	Methyltransferase-like protein 16	METTL16	RNA N6-adenosine-methyltransferase METTL16 OS=Homo sapiens OX=9606 GN=METTL16 PE=1 SV=2		0	0	0	0	0	0	1058
Q86W56	Poly(ADP-ribose) glycohydrolase	PARG	Poly(ADP-ribose) glycohydrolase OS=Homo sapiens OX=9606 GN=PARG PE=1 SV=1		0	0	0	0	0	0	1059
Q86W92;Q8ND30	Liprin-beta-1	PPFIBP1	Liprin-beta-1 OS=Homo sapiens OX=9606 GN=PPFIBP1 PE=1 SV=2		0	0	0	0	0	0	1060
Q86WJ1	Chromodomain-helicase-DNA-binding protein 1-like	CHD1L	Chromodomain-helicase-DNA-binding protein 1-like OS=Homo sapiens OX=9606 GN=CHD1L PE=1 SV=3		0	0	0	0	0	0	1061
Q86X10	Ral GTPase-activating protein subunit beta	RALGAPB	Ral GTPase-activating protein subunit beta OS=Homo sapiens OX=9606 GN=RALGAPB PE=1 SV=1		0	0	0	0	0	0	1062
Q86X29	Lipolysis-stimulated lipoprotein receptor	LSR	Lipolysis-stimulated lipoprotein receptor OS=Homo sapiens OX=9606 GN=LSR PE=1 SV=4		0	0	0	0	0	0	1063
Q86XI2	Condensin-2 complex subunit G2	NCAPG2	Condensin-2 complex subunit G2 OS=Homo sapiens OX=9606 GN=NCAPG2 PE=1 SV=1		0	0	0	0	0	0	1064
Q86XP3	ATP-dependent RNA helicase DDX42	DDX42	ATP-dependent RNA helicase DDX42 OS=Homo sapiens OX=9606 GN=DDX42 PE=1 SV=1		0	0	0	0	0	0	1065
Q86XX4	Extracellular matrix protein FRAS1	FRAS1	Extracellular matrix protein FRAS1 OS=Homo sapiens OX=9606 GN=FRAS1 PE=1 SV=2		0	0	0	0	0	0	1066
Q86Y07	Serine/threonine-protein kinase VRK2	VRK2	Serine/threonine-protein kinase VRK2 OS=Homo sapiens OX=9606 GN=VRK2 PE=1 SV=3		0	0	0	0	0	0	1067
Q86Y56	Dynein assembly factor 5, axonemal	DNAAF5	Dynein assembly factor 5, axonemal OS=Homo sapiens OX=9606 GN=DNAAF5 PE=1 SV=4		0	0	0	0	0	0	1068
Q8IUD2	ELKS/Rab6-interacting/CAST family member 1	ERC1	ELKS/Rab6-interacting/CAST family member 1 OS=Homo sapiens OX=9606 GN=ERC1 PE=1 SV=1		0	0	0	0	0	0	1069
Q8IUH5	Palmitoyltransferase ZDHHC17	ZDHHC17	Palmitoyltransferase ZDHHC17 OS=Homo sapiens OX=9606 GN=ZDHHC17 PE=1 SV=2		0	0	0	0	0	0	1070
Q8IUR0	Trafficking protein particle complex subunit 5	TRAPPC5	Trafficking protein particle complex subunit 5 OS=Homo sapiens OX=9606 GN=TRAPPC5 PE=1 SV=1		0	0	0	0	0	0	1071
Q8IV08	Phospholipase D3	PLD3	5-3 exonuclease PLD3 OS=Homo sapiens OX=9606 GN=PLD3 PE=1 SV=1		0	0	0	0	0	0	1072
Q8IV48	3-5 exoribonuclease 1	ERI1	3-5 exoribonuclease 1 OS=Homo sapiens OX=9606 GN=ERI1 PE=1 SV=3		0	0	0	0	0	0	1073
Q8IVL6	Prolyl 3-hydroxylase 3	LEPREL2	Prolyl 3-hydroxylase 3 OS=Homo sapiens OX=9606 GN=P3H3 PE=1 SV=1		0	0	0	0	0	0	1074
Q8IVM7	Putative uncharacterized protein encoded by LINC00346	LINC00346	Putative uncharacterized protein encoded by LINC00346 OS=Homo sapiens OX=9606 GN=LINC00346 PE=5 SV=1		0	0	0	0	0	0	1075
Q8IVQ6	Palmitoyltransferase ZDHHC21	ZDHHC21	Palmitoyltransferase ZDHHC21 OS=Homo sapiens OX=9606 GN=ZDHHC21 PE=2 SV=1		0	0	0	0	0	0	1076
Q8IVT5	Kinase suppressor of Ras 1	KSR1	Kinase suppressor of Ras 1 OS=Homo sapiens OX=9606 GN=KSR1 PE=1 SV=3		0	0	0	0	0	0	1077
Q8IVU3	Probable E3 ubiquitin-protein ligase HERC6	HERC6	Probable E3 ubiquitin-protein ligase HERC6 OS=Homo sapiens OX=9606 GN=HERC6 PE=1 SV=2		0	0	0	0	0	0	1078
Q8IW52	SLIT and NTRK-like protein 4	SLITRK4	SLIT and NTRK-like protein 4 OS=Homo sapiens OX=9606 GN=SLITRK4 PE=1 SV=1		0	0	0	0	0	0	1079
Q8IWA0	WD repeat-containing protein 75	WDR75	WD repeat-containing protein 75 OS=Homo sapiens OX=9606 GN=WDR75 PE=1 SV=1		0	0	0	0	0	0	1080
Q8IWA5	Choline transporter-like protein 2	SLC44A2	Choline transporter-like protein 2 OS=Homo sapiens OX=9606 GN=SLC44A2 PE=1 SV=3		0	0	0	0	0	0	1081
Q8IWB1	Inositol 1,4,5-trisphosphate receptor-interacting protein	ITPRIP	Inositol 1,4,5-trisphosphate receptor-interacting protein OS=Homo sapiens OX=9606 GN=ITPRIP PE=1 SV=1		0	0	0	0	0	0	1082
Q8IWX8	Calcium homeostasis endoplasmic reticulum protein	CHERP	Calcium homeostasis endoplasmic reticulum protein OS=Homo sapiens OX=9606 GN=CHERP PE=1 SV=3		0	0	0	0	0	0	1083
Q8IX01	SURP and G-patch domain-containing protein 2	SUGP2	SURP and G-patch domain-containing protein 2 OS=Homo sapiens OX=9606 GN=SUGP2 PE=1 SV=2		0	0	0	0	0	0	1084
Q8IX04	Ubiquitin-conjugating enzyme E2 variant 3	UEVLD	Ubiquitin-conjugating enzyme E2 variant 3 OS=Homo sapiens OX=9606 GN=UEVLD PE=1 SV=2		0	0	0	0	0	0	1085
Q8IX18	Probable ATP-dependent RNA helicase DHX40	DHX40	Probable ATP-dependent RNA helicase DHX40 OS=Homo sapiens OX=9606 GN=DHX40 PE=1 SV=2		0	0	0	0	0	0	1086
Q8IXI2	Mitochondrial Rho GTPase 1	RHOT1	Mitochondrial Rho GTPase 1 OS=Homo sapiens OX=9606 GN=RHOT1 PE=1 SV=2		0	0	0	0	0	0	1087
Q8IXM6	Nurim	NRM	Nurim OS=Homo sapiens OX=9606 GN=NRM PE=1 SV=1		0	0	0	0	0	0	1088
Q8IXQ6	Poly [ADP-ribose] polymerase 9	PARP9	Protein mono-ADP-ribosyltransferase PARP9 OS=Homo sapiens OX=9606 GN=PARP9 PE=1 SV=2		0	0	0	0	0	0	1089
Q8IXT5	RNA-binding protein 12B	RBM12B	RNA-binding protein 12B OS=Homo sapiens OX=9606 GN=RBM12B PE=1 SV=2		0	0	0	0	0	0	1090
Q8IY21;Q5H9U9	Probable ATP-dependent RNA helicase DDX60	DDX60	Probable ATP-dependent RNA helicase DDX60 OS=Homo sapiens OX=9606 GN=DDX60 PE=1 SV=3		0	0	0	0	0	0	1091
Q8IY26	Presqualene diphosphate phosphatase	PPAPDC2	Phospholipid phosphatase 6 OS=Homo sapiens OX=9606 GN=PLPP6 PE=1 SV=3		0	0	0	0	0	0	1092
Q8IY95	Transmembrane protein 192	TMEM192	Transmembrane protein 192 OS=Homo sapiens OX=9606 GN=TMEM192 PE=1 SV=1		0	0	0	0	0	0	1093
Q8IYB5	Stromal membrane-associated protein 1	SMAP1	Stromal membrane-associated protein 1 OS=Homo sapiens OX=9606 GN=SMAP1 PE=1 SV=2		0	0	0	0	0	0	1094
Q8IYB8	ATP-dependent RNA helicase SUPV3L1, mitochondrial	SUPV3L1	ATP-dependent RNA helicase SUPV3L1, mitochondrial OS=Homo sapiens OX=9606 GN=SUPV3L1 PE=1 SV=1		0	0	0	0	0	0	1095
Q8IYL3	UPF0688 protein C1orf174	C1orf174	UPF0688 protein C1orf174 OS=Homo sapiens OX=9606 GN=C1orf174 PE=1 SV=2		0	0	0	0	0	0	1096
Q8IYT4	Katanin p60 ATPase-containing subunit A-like 2	KATNAL2	Katanin p60 ATPase-containing subunit A-like 2 OS=Homo sapiens OX=9606 GN=KATNAL2 PE=1 SV=3		0	0	0	0	0	0	1097
Q8IZ69	tRNA (uracil-5-)-methyltransferase homolog A	TRMT2A	tRNA (uracil-5-)-methyltransferase homolog A OS=Homo sapiens OX=9606 GN=TRMT2A PE=1 SV=2		0	0	0	0	0	0	1098
Q8IZ83	Aldehyde dehydrogenase family 16 member A1	ALDH16A1	Aldehyde dehydrogenase family 16 member A1 OS=Homo sapiens OX=9606 GN=ALDH16A1 PE=1 SV=2		0	0	0	0	0	0	1099
Q8IZH2	5-3 exoribonuclease 1	XRN1	5-3 exoribonuclease 1 OS=Homo sapiens OX=9606 GN=XRN1 PE=1 SV=1		0	0	0	0	0	0	1100
Q8IZL8	Proline-, glutamic acid- and leucine-rich protein 1	PELP1	Proline-, glutamic acid- and leucine-rich protein 1 OS=Homo sapiens OX=9606 GN=PELP1 PE=1 SV=2		0	0	0	0	0	0	1101
Q8N131	Porimin	TMEM123	Porimin OS=Homo sapiens OX=9606 GN=TMEM123 PE=1 SV=1		0	0	0	0	0	0	1102
Q8N138	ORM1-like protein 3	ORMDL3	ORM1-like protein 3 OS=Homo sapiens OX=9606 GN=ORMDL3 PE=1 SV=1		0	0	0	0	0	0	1103
Q8N1B4	Vacuolar protein sorting-associated protein 52 homolog	VPS52	Vacuolar protein sorting-associated protein 52 homolog OS=Homo sapiens OX=9606 GN=VPS52 PE=1 SV=1		0	0	0	0	0	0	1104
Q8N1G4	Leucine-rich repeat-containing protein 47	LRRC47	Leucine-rich repeat-containing protein 47 OS=Homo sapiens OX=9606 GN=LRRC47 PE=1 SV=1		0	0	0	0	0	0	1105
Q8N201	Integrator complex subunit 1	INTS1	Integrator complex subunit 1 OS=Homo sapiens OX=9606 GN=INTS1 PE=1 SV=2		0	0	0	0	0	0	1106
Q8N2K1	Ubiquitin-conjugating enzyme E2 J2	UBE2J2	Ubiquitin-conjugating enzyme E2 J2 OS=Homo sapiens OX=9606 GN=UBE2J2 PE=1 SV=3		0	0	0	0	0	0	1107
Q8N2M8	CLK4-associating serine/arginine rich protein	CLASRP	CLK4-associating serine/arginine rich protein OS=Homo sapiens OX=9606 GN=CLASRP PE=1 SV=4		0	0	0	0	0	0	1108
Q8N2U0	Transmembrane protein 256	TMEM256	Transmembrane protein 256 OS=Homo sapiens OX=9606 GN=TMEM256 PE=3 SV=1		0	0	0	0	0	0	1109
Q8N3C0	Activating signal cointegrator 1 complex subunit 3	ASCC3	Activating signal cointegrator 1 complex subunit 3 OS=Homo sapiens OX=9606 GN=ASCC3 PE=1 SV=3		0	0	0	0	0	0	1110
Q8N3D4;Q8NDI1	EH domain-binding protein 1-like protein 1	EHBP1L1	EH domain-binding protein 1-like protein 1 OS=Homo sapiens OX=9606 GN=EHBP1L1 PE=1 SV=2		0	0	0	0	0	0	1111
Q8N3R9	MAGUK p55 subfamily member 5	MPP5	MAGUK p55 subfamily member 5 OS=Homo sapiens OX=9606 GN=MPP5 PE=1 SV=3		0	0	0	0	0	0	1112
Q8N3U4;Q8WVM7	Cohesin subunit SA-2	STAG2	Cohesin subunit SA-2 OS=Homo sapiens OX=9606 GN=STAG2 PE=1 SV=3		0	0	0	0	0	0	1113
Q8N3Z3	GTP-binding protein 8	GTPBP8	GTP-binding protein 8 OS=Homo sapiens OX=9606 GN=GTPBP8 PE=2 SV=1		0	0	0	0	0	0	1114
Q8N490	Probable hydrolase PNKD	PNKD	Probable hydrolase PNKD OS=Homo sapiens OX=9606 GN=PNKD PE=1 SV=2		0	0	0	0	0	0	1115
Q8N4A0	Polypeptide N-acetylgalactosaminyltransferase 4	GALNT4	Polypeptide N-acetylgalactosaminyltransferase 4 OS=Homo sapiens OX=9606 GN=GALNT4 PE=1 SV=2		0	0	0	0	0	0	1116
Q8N4L2	Type 2 phosphatidylinositol 4,5-bisphosphate 4-phosphatase	TMEM55A	Type 2 phosphatidylinositol 4,5-bisphosphate 4-phosphatase OS=Homo sapiens OX=9606 GN=PIP4P2 PE=1 SV=1		0	0	0	0	0	0	1117
Q8N4T8	Carbonyl reductase family member 4	CBR4	Carbonyl reductase family member 4 OS=Homo sapiens OX=9606 GN=CBR4 PE=1 SV=3		0	0	0	0	0	0	1118
Q8N511	Transmembrane protein 199	TMEM199	Transmembrane protein 199 OS=Homo sapiens OX=9606 GN=TMEM199 PE=1 SV=1		0	0	0	0	0	0	1119
Q8N5C6	S1 RNA-binding domain-containing protein 1	SRBD1	S1 RNA-binding domain-containing protein 1 OS=Homo sapiens OX=9606 GN=SRBD1 PE=1 SV=2		0	0	0	0	0	0	1120
Q8N5Y2	Male-specific lethal 3 homolog	MSL3	Male-specific lethal 3 homolog OS=Homo sapiens OX=9606 GN=MSL3 PE=1 SV=1		0	0	0	0	0	0	1121
Q8N5Y8	Mono [ADP-ribose] polymerase PARP16	PARP16	Protein mono-ADP-ribosyltransferase PARP16 OS=Homo sapiens OX=9606 GN=PARP16 PE=1 SV=2		0	0	0	0	0	0	1122
Q8N697	Solute carrier family 15 member 4	SLC15A4	Solute carrier family 15 member 4 OS=Homo sapiens OX=9606 GN=SLC15A4 PE=1 SV=1		0	0	0	0	0	0	1123
Q8N6R0	Methyltransferase-like protein 13	METTL13	eEF1A lysine and N-terminal methyltransferase OS=Homo sapiens OX=9606 GN=EEF1AKNMT PE=1 SV=1		0	0	0	0	0	0	1124
Q8N6T3	ADP-ribosylation factor GTPase-activating protein 1	ARFGAP1	ADP-ribosylation factor GTPase-activating protein 1 OS=Homo sapiens OX=9606 GN=ARFGAP1 PE=1 SV=2		0	0	0	0	0	0	1125
Q8N884	Cyclic GMP-AMP synthase	MB21D1	Cyclic GMP-AMP synthase OS=Homo sapiens OX=9606 GN=CGAS PE=1 SV=2		0	0	0	0	0	0	1126
Q8N8A6	ATP-dependent RNA helicase DDX51	DDX51	ATP-dependent RNA helicase DDX51 OS=Homo sapiens OX=9606 GN=DDX51 PE=1 SV=3		0	0	0	0	0	0	1127
Q8N8Z6	Discoidin, CUB and LCCL domain-containing protein 1	DCBLD1	Discoidin, CUB and LCCL domain-containing protein 1 OS=Homo sapiens OX=9606 GN=DCBLD1 PE=1 SV=2		0	0	0	0	0	0	1128
Q8N9N2	Activating signal cointegrator 1 complex subunit 1	ASCC1	Activating signal cointegrator 1 complex subunit 1 OS=Homo sapiens OX=9606 GN=ASCC1 PE=1 SV=1		0	0	0	0	0	0	1129
Q8N9N7	Leucine-rich repeat-containing protein 57	LRRC57	Leucine-rich repeat-containing protein 57 OS=Homo sapiens OX=9606 GN=LRRC57 PE=1 SV=1		0	0	0	0	0	0	1130
Q8NBI6	Xyloside xylosyltransferase 1	XXYLT1	Xyloside xylosyltransferase 1 OS=Homo sapiens OX=9606 GN=XXYLT1 PE=1 SV=1		0	0	0	0	0	0	1131
Q8NBJ4	Golgi membrane protein 1	GOLM1	Golgi membrane protein 1 OS=Homo sapiens OX=9606 GN=GOLM1 PE=1 SV=1		0	0	0	0	0	0	1132
Q8NC42	E3 ubiquitin-protein ligase RNF149	RNF149	E3 ubiquitin-protein ligase RNF149 OS=Homo sapiens OX=9606 GN=RNF149 PE=2 SV=2		0	0	0	0	0	0	1133
Q8NC54	Keratinocyte-associated transmembrane protein 2	KCT2	Keratinocyte-associated transmembrane protein 2 OS=Homo sapiens OX=9606 GN=KCT2 PE=1 SV=2		0	0	0	0	0	0	1134
Q8NC60	Nitric oxide-associated protein 1	NOA1	Nitric oxide-associated protein 1 OS=Homo sapiens OX=9606 GN=NOA1 PE=1 SV=2		0	0	0	0	0	0	1135
Q8NCC5	Sugar phosphate exchanger 3	SLC37A3	Sugar phosphate exchanger 3 OS=Homo sapiens OX=9606 GN=SLC37A3 PE=2 SV=2		0	0	0	0	0	0	1136
Q8NCG7	Sn1-specific diacylglycerol lipase beta	DAGLB	Sn1-specific diacylglycerol lipase beta OS=Homo sapiens OX=9606 GN=DAGLB PE=1 SV=2		0	0	0	0	0	0	1137
Q8ND04	Protein SMG8	SMG8	Protein SMG8 OS=Homo sapiens OX=9606 GN=SMG8 PE=1 SV=1		0	0	0	0	0	0	1138
Q8ND56	Protein LSM14 homolog A	LSM14A	Protein LSM14 homolog A OS=Homo sapiens OX=9606 GN=LSM14A PE=1 SV=3		0	0	0	0	0	0	1139
Q8NDT2	Putative RNA-binding protein 15B	RBM15B	Putative RNA-binding protein 15B OS=Homo sapiens OX=9606 GN=RBM15B PE=1 SV=3		0	0	0	0	0	0	1140
Q8NDZ4	Deleted in autism protein 1	C3orf58	Divergent protein kinase domain 2A OS=Homo sapiens OX=9606 GN=DIPK2A PE=1 SV=1		0	0	0	0	0	0	1141
Q8NE01	Metal transporter CNNM3	CNNM3	Metal transporter CNNM3 OS=Homo sapiens OX=9606 GN=CNNM3 PE=1 SV=1		0	0	0	0	0	0	1142
Q8NEF9	Serum response factor-binding protein 1	SRFBP1	Serum response factor-binding protein 1 OS=Homo sapiens OX=9606 GN=SRFBP1 PE=1 SV=1		0	0	0	0	0	0	1143
Q8NF91	Nesprin-1	SYNE1	Nesprin-1 OS=Homo sapiens OX=9606 GN=SYNE1 PE=1 SV=4		0	0	0	0	0	0	1144
Q8NFD5	AT-rich interactive domain-containing protein 1B	ARID1B	AT-rich interactive domain-containing protein 1B OS=Homo sapiens OX=9606 GN=ARID1B PE=1 SV=2		0	0	0	0	0	0	1145
Q8NFT8	Delta and Notch-like epidermal growth factor-related receptor	DNER	Delta and Notch-like epidermal growth factor-related receptor OS=Homo sapiens OX=9606 GN=DNER PE=1 SV=1		0	0	0	0	0	0	1146
Q8NG11	Tetraspanin-14	TSPAN14	Tetraspanin-14 OS=Homo sapiens OX=9606 GN=TSPAN14 PE=1 SV=1		0	0	0	0	0	0	1147
Q8NHG7	Small VCP/p97-interacting protein	SVIP	Small VCP/p97-interacting protein OS=Homo sapiens OX=9606 GN=SVIP PE=1 SV=1		0	0	0	0	0	0	1148
Q8NHH9	Atlastin-2	ATL2	Atlastin-2 OS=Homo sapiens OX=9606 GN=ATL2 PE=1 SV=2		0	0	0	0	0	0	1149
Q8NHQ9	ATP-dependent RNA helicase DDX55	DDX55	ATP-dependent RNA helicase DDX55 OS=Homo sapiens OX=9606 GN=DDX55 PE=1 SV=3		0	0	0	0	0	0	1150
Q8NHU3	Phosphatidylcholine:ceramide cholinephosphotransferase 2	SGMS2	Phosphatidylcholine:ceramide cholinephosphotransferase 2 OS=Homo sapiens OX=9606 GN=SGMS2 PE=1 SV=1		0	0	0	0	0	0	1151
Q8NHU6	Tudor domain-containing protein 7	TDRD7	Tudor domain-containing protein 7 OS=Homo sapiens OX=9606 GN=TDRD7 PE=1 SV=2		0	0	0	0	0	0	1152
Q8NHV4	Protein NEDD1	NEDD1	Protein NEDD1 OS=Homo sapiens OX=9606 GN=NEDD1 PE=1 SV=1		0	0	0	0	0	0	1153
Q8TAD4	Zinc transporter 5	SLC30A5	Zinc transporter 5 OS=Homo sapiens OX=9606 GN=SLC30A5 PE=1 SV=1		0	0	0	0	0	0	1154
Q8TAD7	Overexpressed in colon carcinoma 1 protein	OCC1	Overexpressed in colon carcinoma 1 protein OS=Homo sapiens OX=9606 GN=OCC1 PE=1 SV=2		0	0	0	0	0	0	1155
Q8TAE8	Growth arrest and DNA damage-inducible proteins-interacting protein 1	GADD45GIP1	Growth arrest and DNA damage-inducible proteins-interacting protein 1 OS=Homo sapiens OX=9606 GN=GADD45GIP1 PE=1 SV=1		0	0	0	0	0	0	1156
Q8TAG9	Exocyst complex component 6	EXOC6	Exocyst complex component 6 OS=Homo sapiens OX=9606 GN=EXOC6 PE=1 SV=3		0	0	0	0	0	0	1157
Q8TAQ2	SWI/SNF complex subunit SMARCC2	SMARCC2	SWI/SNF complex subunit SMARCC2 OS=Homo sapiens OX=9606 GN=SMARCC2 PE=1 SV=1		0	0	0	0	0	0	1158
Q8TAT6	Nuclear protein localization protein 4 homolog	NPLOC4	Nuclear protein localization protein 4 homolog OS=Homo sapiens OX=9606 GN=NPLOC4 PE=1 SV=3		0	0	0	0	0	0	1159
Q8TB36	Ganglioside-induced differentiation-associated protein 1	GDAP1	Ganglioside-induced differentiation-associated protein 1 OS=Homo sapiens OX=9606 GN=GDAP1 PE=1 SV=3		0	0	0	0	0	0	1160
Q8TB96	T-cell immunomodulatory protein	ITFG1	T-cell immunomodulatory protein OS=Homo sapiens OX=9606 GN=ITFG1 PE=1 SV=1		0	0	0	0	0	0	1161
Q8TBB5	Kelch domain-containing protein 4	KLHDC4	Kelch domain-containing protein 4 OS=Homo sapiens OX=9606 GN=KLHDC4 PE=1 SV=1		0	0	0	0	0	0	1162
Q8TBE7	Solute carrier family 35 member G2	SLC35G2	Solute carrier family 35 member G2 OS=Homo sapiens OX=9606 GN=SLC35G2 PE=1 SV=3		0	0	0	0	0	0	1163
Q8TBF4	Zinc finger CCHC-type and RNA-binding motif-containing protein 1	ZCRB1	Zinc finger CCHC-type and RNA-binding motif-containing protein 1 OS=Homo sapiens OX=9606 GN=ZCRB1 PE=1 SV=2		0	0	0	0	0	0	1164
Q8TBK6	Zinc finger CCHC domain-containing protein 10	ZCCHC10	Zinc finger CCHC domain-containing protein 10 OS=Homo sapiens OX=9606 GN=ZCCHC10 PE=1 SV=1		0	0	0	0	0	0	1165
Q8TBP5	Membrane protein FAM174A	FAM174A	Membrane protein FAM174A OS=Homo sapiens OX=9606 GN=FAM174A PE=2 SV=1		0	0	0	0	0	0	1166
Q8TBQ9	Protein kish-A	TMEM167A	Protein kish-A OS=Homo sapiens OX=9606 GN=TMEM167A PE=1 SV=1		0	0	0	0	0	0	1167
Q8TBX8	Phosphatidylinositol 5-phosphate 4-kinase type-2 gamma	PIP4K2C	Phosphatidylinositol 5-phosphate 4-kinase type-2 gamma OS=Homo sapiens OX=9606 GN=PIP4K2C PE=1 SV=3		0	0	0	0	0	0	1168
Q8TC07	TBC1 domain family member 15	TBC1D15	TBC1 domain family member 15 OS=Homo sapiens OX=9606 GN=TBC1D15 PE=1 SV=2		0	0	0	0	0	0	1169
Q8TCB0	Interferon-induced protein 44	IFI44	Interferon-induced protein 44 OS=Homo sapiens OX=9606 GN=IFI44 PE=2 SV=2		0	0	0	0	0	0	1170
Q8TCC3	39S ribosomal protein L30, mitochondrial	MRPL30	39S ribosomal protein L30, mitochondrial OS=Homo sapiens OX=9606 GN=MRPL30 PE=1 SV=1		0	0	0	0	0	0	1171
Q8TCG2	Phosphatidylinositol 4-kinase type 2-beta	PI4K2B	Phosphatidylinositol 4-kinase type 2-beta OS=Homo sapiens OX=9606 GN=PI4K2B PE=1 SV=1		0	0	0	0	0	0	1172
Q8TCT7	Signal peptide peptidase-like 2B	SPPL2B	Signal peptide peptidase-like 2B OS=Homo sapiens OX=9606 GN=SPPL2B PE=1 SV=2		0	0	0	0	0	0	1173
Q8TCU6	Phosphatidylinositol 3,4,5-trisphosphate-dependent Rac exchanger 1 protein	PREX1	Phosphatidylinositol 3,4,5-trisphosphate-dependent Rac exchanger 1 protein OS=Homo sapiens OX=9606 GN=PREX1 PE=1 SV=3		0	0	0	0	0	0	1174
Q8TDB6	E3 ubiquitin-protein ligase DTX3L	DTX3L	E3 ubiquitin-protein ligase DTX3L OS=Homo sapiens OX=9606 GN=DTX3L PE=1 SV=1		0	0	0	0	0	0	1175
Q8TDX6	Chondroitin sulfate N-acetylgalactosaminyltransferase 1	CSGALNACT1	Chondroitin sulfate N-acetylgalactosaminyltransferase 1 OS=Homo sapiens OX=9606 GN=CSGALNACT1 PE=1 SV=2		0	0	0	0	0	0	1176
Q8TDX7	Serine/threonine-protein kinase Nek7	NEK7	Serine/threonine-protein kinase Nek7 OS=Homo sapiens OX=9606 GN=NEK7 PE=1 SV=1		0	0	0	0	0	0	1177
Q8TEQ6	Gem-associated protein 5	GEMIN5	Gem-associated protein 5 OS=Homo sapiens OX=9606 GN=GEMIN5 PE=1 SV=3		0	0	0	0	0	0	1178
Q8TEX9	Importin-4	IPO4	Importin-4 OS=Homo sapiens OX=9606 GN=IPO4 PE=1 SV=2		0	0	0	0	0	0	1179
Q9NP97;Q8TF09	Dynein light chain roadblock-type 1;Dynein light chain roadblock-type 2	DYNLRB1;DYNLRB2	Dynein light chain roadblock-type 1 OS=Homo sapiens OX=9606 GN=DYNLRB1 PE=1 SV=3;Dynein light chain roadblock-type 2 OS=Homo sapiens OX=9606 GN=DYNLRB2 PE=1 SV=1		0	0	0	0	0	0	1180
Q8WTS1	1-acylglycerol-3-phosphate O-acyltransferase ABHD5	ABHD5	1-acylglycerol-3-phosphate O-acyltransferase ABHD5 OS=Homo sapiens OX=9606 GN=ABHD5 PE=1 SV=1		0	0	0	0	0	0	1181
Q8WU17	E3 ubiquitin-protein ligase RNF139	RNF139	E3 ubiquitin-protein ligase RNF139 OS=Homo sapiens OX=9606 GN=RNF139 PE=1 SV=1		0	0	0	0	0	0	1182
Q8WUA2	Peptidyl-prolyl cis-trans isomerase-like 4	PPIL4	Peptidyl-prolyl cis-trans isomerase-like 4 OS=Homo sapiens OX=9606 GN=PPIL4 PE=1 SV=1		0	0	0	0	0	0	1183
Q8WUA4	General transcription factor 3C polypeptide 2	GTF3C2	General transcription factor 3C polypeptide 2 OS=Homo sapiens OX=9606 GN=GTF3C2 PE=1 SV=2		0	0	0	0	0	0	1184
Q8WUD1	Ras-related protein Rab-2B	RAB2B	Ras-related protein Rab-2B OS=Homo sapiens OX=9606 GN=RAB2B PE=1 SV=1		0	0	0	0	0	0	1185
Q8WUM0	Nuclear pore complex protein Nup133	NUP133	Nuclear pore complex protein Nup133 OS=Homo sapiens OX=9606 GN=NUP133 PE=1 SV=2		0	0	0	0	0	0	1186
Q8WUM9	Sodium-dependent phosphate transporter 1	SLC20A1	Sodium-dependent phosphate transporter 1 OS=Homo sapiens OX=9606 GN=SLC20A1 PE=1 SV=1		0	0	0	0	0	0	1187
Q8WUQ7	Cactin	CACTIN	Cactin OS=Homo sapiens OX=9606 GN=CACTIN PE=1 SV=3		0	0	0	0	0	0	1188
Q8WV16;Q3SXM0	DDB1- and CUL4-associated factor 4	DCAF4	DDB1- and CUL4-associated factor 4 OS=Homo sapiens OX=9606 GN=DCAF4 PE=1 SV=3		0	0	0	0	0	0	1189
Q8WV24	Pleckstrin homology-like domain family A member 1	PHLDA1	Pleckstrin homology-like domain family A member 1 OS=Homo sapiens OX=9606 GN=PHLDA1 PE=1 SV=4		0	0	0	0	0	0	1190
Q8WV41	Sorting nexin-33	SNX33	Sorting nexin-33 OS=Homo sapiens OX=9606 GN=SNX33 PE=1 SV=1		0	0	0	0	0	0	1191
Q8WVB6	Chromosome transmission fidelity protein 18 homolog	CHTF18	Chromosome transmission fidelity protein 18 homolog OS=Homo sapiens OX=9606 GN=CHTF18 PE=1 SV=1		0	0	0	0	0	0	1192
Q8WVM0	Dimethyladenosine transferase 1, mitochondrial	TFB1M	Dimethyladenosine transferase 1, mitochondrial OS=Homo sapiens OX=9606 GN=TFB1M PE=1 SV=1		0	0	0	0	0	0	1193
Q8WVN6	Secreted and transmembrane protein 1	SECTM1	Secreted and transmembrane protein 1 OS=Homo sapiens OX=9606 GN=SECTM1 PE=1 SV=2		0	0	0	0	0	0	1194
Q8WVX3	Uncharacterized protein C4orf3	C4orf3	Uncharacterized protein C4orf3 OS=Homo sapiens OX=9606 GN=C4orf3 PE=1 SV=2		0	0	0	0	0	0	1195
Q8WVY7	Ubiquitin-like domain-containing CTD phosphatase 1	UBLCP1	Ubiquitin-like domain-containing CTD phosphatase 1 OS=Homo sapiens OX=9606 GN=UBLCP1 PE=1 SV=2		0	0	0	0	0	0	1196
Q8WWB7	Glycosylated lysosomal membrane protein	GLMP	Glycosylated lysosomal membrane protein OS=Homo sapiens OX=9606 GN=GLMP PE=1 SV=1		0	0	0	0	0	0	1197
Q8WWM7	Ataxin-2-like protein	ATXN2L	Ataxin-2-like protein OS=Homo sapiens OX=9606 GN=ATXN2L PE=1 SV=2		0	0	0	0	0	0	1198
Q8WWY3	U4/U6 small nuclear ribonucleoprotein Prp31	PRPF31	U4/U6 small nuclear ribonucleoprotein Prp31 OS=Homo sapiens OX=9606 GN=PRPF31 PE=1 SV=2		0	0	0	0	0	0	1199
Q8WX92	Negative elongation factor B	NELFB	Negative elongation factor B OS=Homo sapiens OX=9606 GN=NELFB PE=1 SV=1		0	0	0	0	0	0	1200
Q8WY22	BRI3-binding protein	BRI3BP	BRI3-binding protein OS=Homo sapiens OX=9606 GN=BRI3BP PE=1 SV=1		0	0	0	0	0	0	1201
Q8WYA6	Beta-catenin-like protein 1	CTNNBL1	Beta-catenin-like protein 1 OS=Homo sapiens OX=9606 GN=CTNNBL1 PE=1 SV=1		0	0	0	0	0	0	1202
Q8WYP5	Protein ELYS	AHCTF1	Protein ELYS OS=Homo sapiens OX=9606 GN=AHCTF1 PE=1 SV=3		0	0	0	0	0	0	1203
Q8WZ82	Ovarian cancer-associated gene 2 protein	OVCA2	Esterase OVCA2 OS=Homo sapiens OX=9606 GN=OVCA2 PE=1 SV=1		0	0	0	0	0	0	1204
Q8WZA1	Protein O-linked-mannose beta-1,2-N-acetylglucosaminyltransferase 1	POMGNT1	Protein O-linked-mannose beta-1,2-N-acetylglucosaminyltransferase 1 OS=Homo sapiens OX=9606 GN=POMGNT1 PE=1 SV=2		0	0	0	0	0	0	1205
Q92521	GPI mannosyltransferase 3	PIGB	GPI mannosyltransferase 3 OS=Homo sapiens OX=9606 GN=PIGB PE=1 SV=1		0	0	0	0	0	0	1206
Q92526	T-complex protein 1 subunit zeta-2	CCT6B	T-complex protein 1 subunit zeta-2 OS=Homo sapiens OX=9606 GN=CCT6B PE=1 SV=5		0	0	0	0	0	0	1207
Q92536	Y+L amino acid transporter 2	SLC7A6	Y+L amino acid transporter 2 OS=Homo sapiens OX=9606 GN=SLC7A6 PE=1 SV=3		0	0	0	0	0	0	1208
Q92538	Golgi-specific brefeldin A-resistance guanine nucleotide exchange factor 1	GBF1	Golgi-specific brefeldin A-resistance guanine nucleotide exchange factor 1 OS=Homo sapiens OX=9606 GN=GBF1 PE=1 SV=2		0	0	0	0	0	0	1209
Q92552	28S ribosomal protein S27, mitochondrial	MRPS27	28S ribosomal protein S27, mitochondrial OS=Homo sapiens OX=9606 GN=MRPS27 PE=1 SV=3		0	0	0	0	0	0	1210
Q92581	Sodium/hydrogen exchanger 6	SLC9A6	Sodium/hydrogen exchanger 6 OS=Homo sapiens OX=9606 GN=SLC9A6 PE=1 SV=2		0	0	0	0	0	0	1211
Q92600	Cell differentiation protein RCD1 homolog	RQCD1	CCR4-NOT transcription complex subunit 9 OS=Homo sapiens OX=9606 GN=CNOT9 PE=1 SV=1		0	0	0	0	0	0	1212
Q92688	Acidic leucine-rich nuclear phosphoprotein 32 family member B	ANP32B	Acidic leucine-rich nuclear phosphoprotein 32 family member B OS=Homo sapiens OX=9606 GN=ANP32B PE=1 SV=1		0	0	0	0	0	0	1213
Q92759	General transcription factor IIH subunit 4	GTF2H4	General transcription factor IIH subunit 4 OS=Homo sapiens OX=9606 GN=GTF2H4 PE=1 SV=1		0	0	0	0	0	0	1214
Q92769	Histone deacetylase 2	HDAC2	Histone deacetylase 2 OS=Homo sapiens OX=9606 GN=HDAC2 PE=1 SV=2		0	0	0	0	0	0	1215
Q92791	Synaptonemal complex protein SC65	LEPREL4	Endoplasmic reticulum protein SC65 OS=Homo sapiens OX=9606 GN=P3H4 PE=1 SV=1		0	0	0	0	0	0	1216
Q92797	Symplekin	SYMPK	Symplekin OS=Homo sapiens OX=9606 GN=SYMPK PE=1 SV=2		0	0	0	0	0	0	1217
Q92878	DNA repair protein RAD50	RAD50	DNA repair protein RAD50 OS=Homo sapiens OX=9606 GN=RAD50 PE=1 SV=1		0	0	0	0	0	0	1218
Q92888	Rho guanine nucleotide exchange factor 1	ARHGEF1	Rho guanine nucleotide exchange factor 1 OS=Homo sapiens OX=9606 GN=ARHGEF1 PE=1 SV=2		0	0	0	0	0	0	1219
Q92908	Transcription factor GATA-6	GATA6	Transcription factor GATA-6 OS=Homo sapiens OX=9606 GN=GATA6 PE=1 SV=2		0	0	0	0	0	0	1220
Q92922	SWI/SNF complex subunit SMARCC1	SMARCC1	SWI/SNF complex subunit SMARCC1 OS=Homo sapiens OX=9606 GN=SMARCC1 PE=1 SV=3		0	0	0	0	0	0	1221
Q92925	SWI/SNF-related matrix-associated actin-dependent regulator of chromatin subfamily D member 2	SMARCD2	SWI/SNF-related matrix-associated actin-dependent regulator of chromatin subfamily D member 2 OS=Homo sapiens OX=9606 GN=SMARCD2 PE=1 SV=3		0	0	0	0	0	0	1222
Q92930	Ras-related protein Rab-8B	RAB8B	Ras-related protein Rab-8B OS=Homo sapiens OX=9606 GN=RAB8B PE=1 SV=2		0	0	0	0	0	0	1223
Q92945	Far upstream element-binding protein 2	KHSRP	Far upstream element-binding protein 2 OS=Homo sapiens OX=9606 GN=KHSRP PE=1 SV=4		0	0	0	0	0	0	1224
Q92963	GTP-binding protein Rit1	RIT1	GTP-binding protein Rit1 OS=Homo sapiens OX=9606 GN=RIT1 PE=1 SV=1		0	0	0	0	0	0	1225
Q93008	Probable ubiquitin carboxyl-terminal hydrolase FAF-X	USP9X	Probable ubiquitin carboxyl-terminal hydrolase FAF-X OS=Homo sapiens OX=9606 GN=USP9X PE=1 SV=3		0	0	0	0	0	0	1226
Q93009	Ubiquitin carboxyl-terminal hydrolase 7	USP7	Ubiquitin carboxyl-terminal hydrolase 7 OS=Homo sapiens OX=9606 GN=USP7 PE=1 SV=2		0	0	0	0	0	0	1227
Q93063	Exostosin-2	EXT2	Exostosin-2 OS=Homo sapiens OX=9606 GN=EXT2 PE=1 SV=1		0	0	0	0	0	0	1228
Q93074	Mediator of RNA polymerase II transcription subunit 12	MED12	Mediator of RNA polymerase II transcription subunit 12 OS=Homo sapiens OX=9606 GN=MED12 PE=1 SV=4		0	0	0	0	0	0	1229
Q93086	P2X purinoceptor 5	P2RX5	P2X purinoceptor 5 OS=Homo sapiens OX=9606 GN=P2RX5 PE=2 SV=4		0	0	0	0	0	0	1230
Q969Q0	60S ribosomal protein L36a-like	RPL36AL	60S ribosomal protein L36a-like OS=Homo sapiens OX=9606 GN=RPL36AL PE=1 SV=3		0	0	0	0	0	0	1231
Q969Q5	Ras-related protein Rab-24	RAB24	Ras-related protein Rab-24 OS=Homo sapiens OX=9606 GN=RAB24 PE=1 SV=1		0	0	0	0	0	0	1232
Q969U7	Proteasome assembly chaperone 2	PSMG2	Proteasome assembly chaperone 2 OS=Homo sapiens OX=9606 GN=PSMG2 PE=1 SV=1		0	0	0	0	0	0	1233
Q969X1	Protein lifeguard 3	TMBIM1	Protein lifeguard 3 OS=Homo sapiens OX=9606 GN=TMBIM1 PE=1 SV=2		0	0	0	0	0	0	1234
Q969Z0	Protein TBRG4	TBRG4	FAST kinase domain-containing protein 4 OS=Homo sapiens OX=9606 GN=TBRG4 PE=1 SV=1		0	0	0	0	0	0	1235
Q96A65	Exocyst complex component 4	EXOC4	Exocyst complex component 4 OS=Homo sapiens OX=9606 GN=EXOC4 PE=1 SV=1		0	0	0	0	0	0	1236
Q96AE4	Far upstream element-binding protein 1	FUBP1	Far upstream element-binding protein 1 OS=Homo sapiens OX=9606 GN=FUBP1 PE=1 SV=3		0	0	0	0	0	0	1237
Q96AG3	Solute carrier family 25 member 46	SLC25A46	Solute carrier family 25 member 46 OS=Homo sapiens OX=9606 GN=SLC25A46 PE=1 SV=1		0	0	0	0	0	0	1238
Q96AX1	Vacuolar protein sorting-associated protein 33A	VPS33A	Vacuolar protein sorting-associated protein 33A OS=Homo sapiens OX=9606 GN=VPS33A PE=1 SV=1		0	0	0	0	0	0	1239
Q96AZ6	Interferon-stimulated gene 20 kDa protein	ISG20	Interferon-stimulated gene 20 kDa protein OS=Homo sapiens OX=9606 GN=ISG20 PE=1 SV=2		0	0	0	0	0	0	1240
Q96BI1	Solute carrier family 22 member 18	SLC22A18	Solute carrier family 22 member 18 OS=Homo sapiens OX=9606 GN=SLC22A18 PE=1 SV=3		0	0	0	0	0	0	1241
Q96BI3	Gamma-secretase subunit APH-1A	APH1A	Gamma-secretase subunit APH-1A OS=Homo sapiens OX=9606 GN=APH1A PE=1 SV=1		0	0	0	0	0	0	1242
Q96BJ3	Axin interactor, dorsalization-associated protein	AIDA	Axin interactor, dorsalization-associated protein OS=Homo sapiens OX=9606 GN=AIDA PE=1 SV=1		0	0	0	0	0	0	1243
Q96BM9	ADP-ribosylation factor-like protein 8A	ARL8A	ADP-ribosylation factor-like protein 8A OS=Homo sapiens OX=9606 GN=ARL8A PE=1 SV=1		0	0	0	0	0	0	1244
Q96BP3	Peptidylprolyl isomerase domain and WD repeat-containing protein 1	PPWD1	Peptidylprolyl isomerase domain and WD repeat-containing protein 1 OS=Homo sapiens OX=9606 GN=PPWD1 PE=1 SV=1		0	0	0	0	0	0	1245
Q96BQ5	Coiled-coil domain-containing protein 127	CCDC127	Coiled-coil domain-containing protein 127 OS=Homo sapiens OX=9606 GN=CCDC127 PE=1 SV=1		0	0	0	0	0	0	1246
Q96CP6	GRAM domain-containing protein 1A	GRAMD1A	Protein Aster-A OS=Homo sapiens OX=9606 GN=GRAMD1A PE=1 SV=2		0	0	0	0	0	0	1247
Q96CT7	Coiled-coil domain-containing protein 124	CCDC124	Coiled-coil domain-containing protein 124 OS=Homo sapiens OX=9606 GN=CCDC124 PE=1 SV=1		0	0	0	0	0	0	1248
Q96CX2	BTB/POZ domain-containing protein KCTD12	KCTD12	BTB/POZ domain-containing protein KCTD12 OS=Homo sapiens OX=9606 GN=KCTD12 PE=1 SV=1		0	0	0	0	0	0	1249
Q96D46	60S ribosomal export protein NMD3	NMD3	60S ribosomal export protein NMD3 OS=Homo sapiens OX=9606 GN=NMD3 PE=1 SV=1		0	0	0	0	0	0	1250
Q96D70	R3H domain-containing protein 4	R3HDM4	R3H domain-containing protein 4 OS=Homo sapiens OX=9606 GN=R3HDM4 PE=1 SV=3		0	0	0	0	0	0	1251
Q96DG6	Carboxymethylenebutenolidase homolog	CMBL	Carboxymethylenebutenolidase homolog OS=Homo sapiens OX=9606 GN=CMBL PE=1 SV=1		0	0	0	0	0	0	1252
Q96E22	Dehydrodolichyl diphosphate syntase complex subunit NUS1	NUS1	Dehydrodolichyl diphosphate synthase complex subunit NUS1 OS=Homo sapiens OX=9606 GN=NUS1 PE=1 SV=1		0	0	0	0	0	0	1253
Q96E29	Transcription termination factor 3, mitochondrial	MTERF3	Transcription termination factor 3, mitochondrial OS=Homo sapiens OX=9606 GN=MTERF3 PE=1 SV=2		0	0	0	0	0	0	1254
Q96EB1	Elongator complex protein 4	ELP4	Elongator complex protein 4 OS=Homo sapiens OX=9606 GN=ELP4 PE=1 SV=2		0	0	0	0	0	0	1255
Q96EE3	Nucleoporin SEH1	SEH1L	Nucleoporin SEH1 OS=Homo sapiens OX=9606 GN=SEH1L PE=1 SV=3		0	0	0	0	0	0	1256
Q96EN8	Molybdenum cofactor sulfurase	MOCOS	Molybdenum cofactor sulfurase OS=Homo sapiens OX=9606 GN=MOCOS PE=1 SV=2		0	0	0	0	0	0	1257
Q96EP5	DAZ-associated protein 1	DAZAP1	DAZ-associated protein 1 OS=Homo sapiens OX=9606 GN=DAZAP1 PE=1 SV=1		0	0	0	0	0	0	1258
Q96EV2	RNA-binding protein 33	RBM33	RNA-binding protein 33 OS=Homo sapiens OX=9606 GN=RBM33 PE=1 SV=3		0	0	0	0	0	0	1259
Q96EY7	Pentatricopeptide repeat domain-containing protein 3, mitochondrial	PTCD3	Pentatricopeptide repeat domain-containing protein 3, mitochondrial OS=Homo sapiens OX=9606 GN=PTCD3 PE=1 SV=3		0	0	0	0	0	0	1260
Q96EZ8	Microspherule protein 1	MCRS1	Microspherule protein 1 OS=Homo sapiens OX=9606 GN=MCRS1 PE=1 SV=1		0	0	0	0	0	0	1261
Q96F07	Cytoplasmic FMR1-interacting protein 2	CYFIP2	Cytoplasmic FMR1-interacting protein 2 OS=Homo sapiens OX=9606 GN=CYFIP2 PE=1 SV=2		0	0	0	0	0	0	1262
Q96F86	Enhancer of mRNA-decapping protein 3	EDC3	Enhancer of mRNA-decapping protein 3 OS=Homo sapiens OX=9606 GN=EDC3 PE=1 SV=1		0	0	0	0	0	0	1263
Q96FJ2	Dynein light chain 2, cytoplasmic	DYNLL2	Dynein light chain 2, cytoplasmic OS=Homo sapiens OX=9606 GN=DYNLL2 PE=1 SV=1		0	0	0	0	0	0	1264
Q96FL8	Multidrug and toxin extrusion protein 1	SLC47A1	Multidrug and toxin extrusion protein 1 OS=Homo sapiens OX=9606 GN=SLC47A1 PE=1 SV=1		0	0	0	0	0	0	1265
Q96FQ6	Protein S100-A16	S100A16	Protein S100-A16 OS=Homo sapiens OX=9606 GN=S100A16 PE=1 SV=1		0	0	0	0	0	0	1266
Q96FV9	THO complex subunit 1	THOC1	THO complex subunit 1 OS=Homo sapiens OX=9606 GN=THOC1 PE=1 SV=1		0	0	0	0	0	0	1267
Q96FX8	p53 apoptosis effector related to PMP-22	PERP	p53 apoptosis effector related to PMP-22 OS=Homo sapiens OX=9606 GN=PERP PE=2 SV=1		0	0	0	0	0	0	1268
Q96FZ2	Embryonic stem cell-specific 5-hydroxymethylcytosine-binding protein	HMCES	Abasic site processing protein HMCES OS=Homo sapiens OX=9606 GN=HMCES PE=1 SV=1		0	0	0	0	0	0	1269
Q96GC5	39S ribosomal protein L48, mitochondrial	MRPL48	39S ribosomal protein L48, mitochondrial OS=Homo sapiens OX=9606 GN=MRPL48 PE=1 SV=2		0	0	0	0	0	0	1270
Q96GD4	Aurora kinase B	AURKB	Aurora kinase B OS=Homo sapiens OX=9606 GN=AURKB PE=1 SV=3		0	0	0	0	0	0	1271
Q96GE9	Transmembrane protein 261	TMEM261	Distal membrane-arm assembly complex protein 1 OS=Homo sapiens OX=9606 GN=DMAC1 PE=1 SV=1		0	0	0	0	0	0	1272
Q96GF1	E3 ubiquitin-protein ligase RNF185	RNF185	E3 ubiquitin-protein ligase RNF185 OS=Homo sapiens OX=9606 GN=RNF185 PE=1 SV=1		0	0	0	0	0	0	1273
Q96GG9	DCN1-like protein 1	DCUN1D1	DCN1-like protein 1 OS=Homo sapiens OX=9606 GN=DCUN1D1 PE=1 SV=1		0	0	0	0	0	0	1274
Q96GM5	SWI/SNF-related matrix-associated actin-dependent regulator of chromatin subfamily D member 1	SMARCD1	SWI/SNF-related matrix-associated actin-dependent regulator of chromatin subfamily D member 1 OS=Homo sapiens OX=9606 GN=SMARCD1 PE=1 SV=2		0	0	0	0	0	0	1275
Q96GR4	Probable palmitoyltransferase ZDHHC12	ZDHHC12	Probable palmitoyltransferase ZDHHC12 OS=Homo sapiens OX=9606 GN=ZDHHC12 PE=2 SV=2		0	0	0	0	0	0	1276
Q96H20	Vacuolar-sorting protein SNF8	SNF8	Vacuolar-sorting protein SNF8 OS=Homo sapiens OX=9606 GN=SNF8 PE=1 SV=1		0	0	0	0	0	0	1277
Q96H35	Probable RNA-binding protein 18	RBM18	Probable RNA-binding protein 18 OS=Homo sapiens OX=9606 GN=RBM18 PE=2 SV=1		0	0	0	0	0	0	1278
Q96H79	Zinc finger CCCH-type antiviral protein 1-like	ZC3HAV1L	Zinc finger CCCH-type antiviral protein 1-like OS=Homo sapiens OX=9606 GN=ZC3HAV1L PE=1 SV=2		0	0	0	0	0	0	1279
Q96HH9	GRAM domain-containing protein 3	GRAMD3	GRAM domain-containing protein 2B OS=Homo sapiens OX=9606 GN=GRAMD2B PE=1 SV=1		0	0	0	0	0	0	1280
Q96I24	Far upstream element-binding protein 3	FUBP3	Far upstream element-binding protein 3 OS=Homo sapiens OX=9606 GN=FUBP3 PE=1 SV=2		0	0	0	0	0	0	1281
Q96I51	Williams-Beuren syndrome chromosomal region 16 protein	WBSCR16	RCC1-like G exchanging factor-like protein OS=Homo sapiens OX=9606 GN=RCC1L PE=1 SV=2		0	0	0	0	0	0	1282
Q96J02	E3 ubiquitin-protein ligase Itchy homolog	ITCH	E3 ubiquitin-protein ligase Itchy homolog OS=Homo sapiens OX=9606 GN=ITCH PE=1 SV=2		0	0	0	0	0	0	1283
Q96J42	Thioredoxin domain-containing protein 15	TXNDC15	Thioredoxin domain-containing protein 15 OS=Homo sapiens OX=9606 GN=TXNDC15 PE=1 SV=1		0	0	0	0	0	0	1284
Q96JB2	Conserved oligomeric Golgi complex subunit 3	COG3	Conserved oligomeric Golgi complex subunit 3 OS=Homo sapiens OX=9606 GN=COG3 PE=1 SV=3		0	0	0	0	0	0	1285
Q96JB5	CDK5 regulatory subunit-associated protein 3	CDK5RAP3	CDK5 regulatory subunit-associated protein 3 OS=Homo sapiens OX=9606 GN=CDK5RAP3 PE=1 SV=2		0	0	0	0	0	0	1286
Q96JG6	Coiled-coil domain-containing protein 132	CCDC132	Syndetin OS=Homo sapiens OX=9606 GN=VPS50 PE=1 SV=3		0	0	0	0	0	0	1287
Q96JI7	Spatacsin	SPG11	Spatacsin OS=Homo sapiens OX=9606 GN=SPG11 PE=1 SV=3		0	0	0	0	0	0	1288
Q96JJ3	Engulfment and cell motility protein 2	ELMO2	Engulfment and cell motility protein 2 OS=Homo sapiens OX=9606 GN=ELMO2 PE=1 SV=2		0	0	0	0	0	0	1289
Q96KP1	Exocyst complex component 2	EXOC2	Exocyst complex component 2 OS=Homo sapiens OX=9606 GN=EXOC2 PE=1 SV=1		0	0	0	0	0	0	1290
Q96KX2	F-actin-capping protein subunit alpha-3	CAPZA3	F-actin-capping protein subunit alpha-3 OS=Homo sapiens OX=9606 GN=CAPZA3 PE=1 SV=2		0	0	0	0	0	0	1291
Q96L50	Leucine-rich repeat protein 1	LRR1	Leucine-rich repeat protein 1 OS=Homo sapiens OX=9606 GN=LRR1 PE=1 SV=2		0	0	0	0	0	0	1292
Q96L58	Beta-1,3-galactosyltransferase 6	B3GALT6	Beta-1,3-galactosyltransferase 6 OS=Homo sapiens OX=9606 GN=B3GALT6 PE=1 SV=2		0	0	0	0	0	0	1293
Q96L91	E1A-binding protein p400	EP400	E1A-binding protein p400 OS=Homo sapiens OX=9606 GN=EP400 PE=1 SV=4		0	0	0	0	0	0	1294
Q96L92	Sorting nexin-27	SNX27	Sorting nexin-27 OS=Homo sapiens OX=9606 GN=SNX27 PE=1 SV=2		0	0	0	0	0	0	1295
Q96LI5;Q9ULM6	CCR4-NOT transcription complex subunit 6-like;CCR4-NOT transcription complex subunit 6	CNOT6L;CNOT6	CCR4-NOT transcription complex subunit 6-like OS=Homo sapiens OX=9606 GN=CNOT6L PE=1 SV=2;CCR4-NOT transcription complex subunit 6 OS=Homo sapiens OX=9606 GN=CNOT6 PE=1 SV=2		0	0	0	0	0	0	1296
Q96ME1	F-box/LRR-repeat protein 18	FBXL18	F-box/LRR-repeat protein 18 OS=Homo sapiens OX=9606 GN=FBXL18 PE=1 SV=2		0	0	0	0	0	0	1297
Q96N67;Q8NF50	Dedicator of cytokinesis protein 7	DOCK7	Dedicator of cytokinesis protein 7 OS=Homo sapiens OX=9606 GN=DOCK7 PE=1 SV=4		0	0	0	0	0	0	1298
Q96ND0	Protein FAM210A	FAM210A	Protein FAM210A OS=Homo sapiens OX=9606 GN=FAM210A PE=1 SV=2		0	0	0	0	0	0	1299
Q96NT5	Proton-coupled folate transporter	SLC46A1	Proton-coupled folate transporter OS=Homo sapiens OX=9606 GN=SLC46A1 PE=1 SV=1		0	0	0	0	0	0	1300
Q96P11;Q63ZY6;Q3KNT7	Probable 28S rRNA (cytosine-C(5))-methyltransferase	NSUN5	Probable 28S rRNA (cytosine-C(5))-methyltransferase OS=Homo sapiens OX=9606 GN=NSUN5 PE=1 SV=2		0	0	0	0	0	0	1301
Q96P16	Regulation of nuclear pre-mRNA domain-containing protein 1A	RPRD1A	Regulation of nuclear pre-mRNA domain-containing protein 1A OS=Homo sapiens OX=9606 GN=RPRD1A PE=1 SV=1		0	0	0	0	0	0	1302
Q96PZ0	Pseudouridylate synthase 7 homolog	PUS7	Pseudouridylate synthase 7 homolog OS=Homo sapiens OX=9606 GN=PUS7 PE=1 SV=2		0	0	0	0	0	0	1303
Q96Q15	Serine/threonine-protein kinase SMG1	SMG1	Serine/threonine-protein kinase SMG1 OS=Homo sapiens OX=9606 GN=SMG1 PE=1 SV=3		0	0	0	0	0	0	1304
Q96QE3	ATPase family AAA domain-containing protein 5	ATAD5	ATPase family AAA domain-containing protein 5 OS=Homo sapiens OX=9606 GN=ATAD5 PE=1 SV=4		0	0	0	0	0	0	1305
Q96QE5	Transcription elongation factor, mitochondrial	TEFM	Transcription elongation factor, mitochondrial OS=Homo sapiens OX=9606 GN=TEFM PE=1 SV=1		0	0	0	0	0	0	1306
Q96QG7	Myotubularin-related protein 9	MTMR9	Myotubularin-related protein 9 OS=Homo sapiens OX=9606 GN=MTMR9 PE=1 SV=1		0	0	0	0	0	0	1307
Q96QR8	Transcriptional activator protein Pur-beta	PURB	Transcriptional activator protein Pur-beta OS=Homo sapiens OX=9606 GN=PURB PE=1 SV=3		0	0	0	0	0	0	1308
Q96QT4	Transient receptor potential cation channel subfamily M member 7	TRPM7	Transient receptor potential cation channel subfamily M member 7 OS=Homo sapiens OX=9606 GN=TRPM7 PE=1 SV=1		0	0	0	0	0	0	1309
Q96RD7	Pannexin-1	PANX1	Pannexin-1 OS=Homo sapiens OX=9606 GN=PANX1 PE=1 SV=4		0	0	0	0	0	0	1310
Q96RE7;Q96BF6	Nucleus accumbens-associated protein 1;Nucleus accumbens-associated protein 2	NACC1;NACC2	Nucleus accumbens-associated protein 1 OS=Homo sapiens OX=9606 GN=NACC1 PE=1 SV=1;Nucleus accumbens-associated protein 2 OS=Homo sapiens OX=9606 GN=NACC2 PE=1 SV=1		0	0	0	0	0	0	1311
Q96RL7	Vacuolar protein sorting-associated protein 13A	VPS13A	Vacuolar protein sorting-associated protein 13A OS=Homo sapiens OX=9606 GN=VPS13A PE=1 SV=2		0	0	0	0	0	0	1312
Q96SB4;Q9UPE1	SRSF protein kinase 1	SRPK1	SRSF protein kinase 1 OS=Homo sapiens OX=9606 GN=SRPK1 PE=1 SV=2		0	0	0	0	0	0	1313
Q96SI9	Spermatid perinuclear RNA-binding protein	STRBP	Spermatid perinuclear RNA-binding protein OS=Homo sapiens OX=9606 GN=STRBP PE=1 SV=1		0	0	0	0	0	0	1314
Q96ST3	Paired amphipathic helix protein Sin3a	SIN3A	Paired amphipathic helix protein Sin3a OS=Homo sapiens OX=9606 GN=SIN3A PE=1 SV=2		0	0	0	0	0	0	1315
Q96SU4	Oxysterol-binding protein-related protein 9	OSBPL9	Oxysterol-binding protein-related protein 9 OS=Homo sapiens OX=9606 GN=OSBPL9 PE=1 SV=2		0	0	0	0	0	0	1316
Q96T60	Bifunctional polynucleotide phosphatase/kinase;Polynucleotide 3-phosphatase;Polynucleotide 5-hydroxyl-kinase	PNKP	Bifunctional polynucleotide phosphatase/kinase OS=Homo sapiens OX=9606 GN=PNKP PE=1 SV=1		0	0	0	0	0	0	1317
Q99436	Proteasome subunit beta type-7	PSMB7	Proteasome subunit beta type-7 OS=Homo sapiens OX=9606 GN=PSMB7 PE=1 SV=1		0	0	0	0	0	0	1318
Q99460	26S proteasome non-ATPase regulatory subunit 1	PSMD1	26S proteasome non-ATPase regulatory subunit 1 OS=Homo sapiens OX=9606 GN=PSMD1 PE=1 SV=2		0	0	0	0	0	0	1319
Q99543	DnaJ homolog subfamily C member 2;DnaJ homolog subfamily C member 2, N-terminally processed	DNAJC2	DnaJ homolog subfamily C member 2 OS=Homo sapiens OX=9606 GN=DNAJC2 PE=1 SV=4		0	0	0	0	0	0	1320
Q99549	M-phase phosphoprotein 8	MPHOSPH8	M-phase phosphoprotein 8 OS=Homo sapiens OX=9606 GN=MPHOSPH8 PE=1 SV=2		0	0	0	0	0	0	1321
Q99570	Phosphoinositide 3-kinase regulatory subunit 4	PIK3R4	Phosphoinositide 3-kinase regulatory subunit 4 OS=Homo sapiens OX=9606 GN=PIK3R4 PE=1 SV=3		0	0	0	0	0	0	1322
Q99584	Protein S100-A13	S100A13	Protein S100-A13 OS=Homo sapiens OX=9606 GN=S100A13 PE=1 SV=1		0	0	0	0	0	0	1323
Q99614	Tetratricopeptide repeat protein 1	TTC1	Tetratricopeptide repeat protein 1 OS=Homo sapiens OX=9606 GN=TTC1 PE=1 SV=1		0	0	0	0	0	0	1324
Q99643	Succinate dehydrogenase cytochrome b560 subunit, mitochondrial	SDHC	Succinate dehydrogenase cytochrome b560 subunit, mitochondrial OS=Homo sapiens OX=9606 GN=SDHC PE=1 SV=1		0	0	0	0	0	0	1325
Q99650	Oncostatin-M-specific receptor subunit beta	OSMR	Oncostatin-M-specific receptor subunit beta OS=Homo sapiens OX=9606 GN=OSMR PE=1 SV=1		0	0	0	0	0	0	1326
Q99661	Kinesin-like protein KIF2C	KIF2C	Kinesin-like protein KIF2C OS=Homo sapiens OX=9606 GN=KIF2C PE=1 SV=2		0	0	0	0	0	0	1327
Q99685	Monoglyceride lipase	MGLL	Monoglyceride lipase OS=Homo sapiens OX=9606 GN=MGLL PE=1 SV=2		0	0	0	0	0	0	1328
Q99715	Collagen alpha-1(XII) chain	COL12A1	Collagen alpha-1(XII) chain OS=Homo sapiens OX=9606 GN=COL12A1 PE=1 SV=2		0	0	0	0	0	0	1329
Q99729	Heterogeneous nuclear ribonucleoprotein A/B	HNRNPAB	Heterogeneous nuclear ribonucleoprotein A/B OS=Homo sapiens OX=9606 GN=HNRNPAB PE=1 SV=2		0	0	0	0	0	0	1330
Q99735	Microsomal glutathione S-transferase 2	MGST2	Microsomal glutathione S-transferase 2 OS=Homo sapiens OX=9606 GN=MGST2 PE=1 SV=1		0	0	0	0	0	0	1331
Q99808	Equilibrative nucleoside transporter 1	SLC29A1	Equilibrative nucleoside transporter 1 OS=Homo sapiens OX=9606 GN=SLC29A1 PE=1 SV=3		0	0	0	0	0	0	1332
Q99816	Tumor susceptibility gene 101 protein	TSG101	Tumor susceptibility gene 101 protein OS=Homo sapiens OX=9606 GN=TSG101 PE=1 SV=2		0	0	0	0	0	0	1333
Q99873	Protein arginine N-methyltransferase 1	PRMT1	Protein arginine N-methyltransferase 1 OS=Homo sapiens OX=9606 GN=PRMT1 PE=1 SV=3		0	0	0	0	0	0	1334
Q99942	E3 ubiquitin-protein ligase RNF5	RNF5	E3 ubiquitin-protein ligase RNF5 OS=Homo sapiens OX=9606 GN=RNF5 PE=1 SV=1		0	0	0	0	0	0	1335
Q99985	Semaphorin-3C	SEMA3C	Semaphorin-3C OS=Homo sapiens OX=9606 GN=SEMA3C PE=2 SV=2		0	0	0	0	0	0	1336
Q9BPX3	Condensin complex subunit 3	NCAPG	Condensin complex subunit 3 OS=Homo sapiens OX=9606 GN=NCAPG PE=1 SV=1		0	0	0	0	0	0	1337
Q9BPX6	Calcium uptake protein 1, mitochondrial	MICU1	Calcium uptake protein 1, mitochondrial OS=Homo sapiens OX=9606 GN=MICU1 PE=1 SV=1		0	0	0	0	0	0	1338
Q9BPZ7	Target of rapamycin complex 2 subunit MAPKAP1	MAPKAP1	Target of rapamycin complex 2 subunit MAPKAP1 OS=Homo sapiens OX=9606 GN=MAPKAP1 PE=1 SV=2		0	0	0	0	0	0	1339
Q9BQ04;Q9BWF3	RNA-binding protein 4B;RNA-binding protein 4	RBM4B;RBM4	RNA-binding protein 4B OS=Homo sapiens OX=9606 GN=RBM4B PE=1 SV=1;RNA-binding protein 4 OS=Homo sapiens OX=9606 GN=RBM4 PE=1 SV=1		0	0	0	0	0	0	1340
Q9BQ24	Zinc finger FYVE domain-containing protein 21	ZFYVE21	Zinc finger FYVE domain-containing protein 21 OS=Homo sapiens OX=9606 GN=ZFYVE21 PE=1 SV=1		0	0	0	0	0	0	1341
Q9BQ52	Zinc phosphodiesterase ELAC protein 2	ELAC2	Zinc phosphodiesterase ELAC protein 2 OS=Homo sapiens OX=9606 GN=ELAC2 PE=1 SV=2		0	0	0	0	0	0	1342
Q9BQ75	Protein CMSS1	CMSS1	Protein CMSS1 OS=Homo sapiens OX=9606 GN=CMSS1 PE=1 SV=2		0	0	0	0	0	0	1343
Q9BQ90	Kelch domain-containing protein 3	KLHDC3	Kelch domain-containing protein 3 OS=Homo sapiens OX=9606 GN=KLHDC3 PE=2 SV=1		0	0	0	0	0	0	1344
Q9BQA9	Uncharacterized protein C17orf62	C17orf62	Cytochrome b-245 chaperone 1 OS=Homo sapiens OX=9606 GN=CYBC1 PE=1 SV=1		0	0	0	0	0	0	1345
Q9BQE5	Apolipoprotein L2	APOL2	Apolipoprotein L2 OS=Homo sapiens OX=9606 GN=APOL2 PE=1 SV=1		0	0	0	0	0	0	1346
Q9BR76	Coronin-1B	CORO1B	Coronin-1B OS=Homo sapiens OX=9606 GN=CORO1B PE=1 SV=1		0	0	0	0	0	0	1347
Q9BRQ8	Apoptosis-inducing factor 2	AIFM2	Apoptosis-inducing factor 2 OS=Homo sapiens OX=9606 GN=AIFM2 PE=1 SV=1		0	0	0	0	0	0	1348
Q9BRR3	Transmembrane protein 246	TMEM246	Transmembrane protein 246 OS=Homo sapiens OX=9606 GN=TMEM246 PE=1 SV=1		0	0	0	0	0	0	1349
Q9BRS2	Serine/threonine-protein kinase RIO1	RIOK1	Serine/threonine-protein kinase RIO1 OS=Homo sapiens OX=9606 GN=RIOK1 PE=1 SV=2		0	0	0	0	0	0	1350
Q9BRZ2	E3 ubiquitin-protein ligase TRIM56	TRIM56	E3 ubiquitin-protein ligase TRIM56 OS=Homo sapiens OX=9606 GN=TRIM56 PE=1 SV=3		0	0	0	0	0	0	1351
Q9BSF4	Uncharacterized protein C19orf52	C19orf52	Mitochondrial import inner membrane translocase subunit Tim29 OS=Homo sapiens OX=9606 GN=TIMM29 PE=1 SV=2		0	0	0	0	0	0	1352
Q9BSU1	UPF0183 protein C16orf70	C16orf70	UPF0183 protein C16orf70 OS=Homo sapiens OX=9606 GN=C16orf70 PE=1 SV=1		0	0	0	0	0	0	1353
Q9BTC8	Metastasis-associated protein MTA3	MTA3	Metastasis-associated protein MTA3 OS=Homo sapiens OX=9606 GN=MTA3 PE=1 SV=2		0	0	0	0	0	0	1354
Q9BTD8	RNA-binding protein 42	RBM42	RNA-binding protein 42 OS=Homo sapiens OX=9606 GN=RBM42 PE=1 SV=1		0	0	0	0	0	0	1355
Q9BTE7	DCN1-like protein 5	DCUN1D5	DCN1-like protein 5 OS=Homo sapiens OX=9606 GN=DCUN1D5 PE=1 SV=1		0	0	0	0	0	0	1356
Q9BUH8	Brain-enriched guanylate kinase-associated protein	BEGAIN	Brain-enriched guanylate kinase-associated protein OS=Homo sapiens OX=9606 GN=BEGAIN PE=1 SV=1		0	0	0	0	0	0	1357
Q9BUM1	Glucose-6-phosphatase 3	G6PC3	Glucose-6-phosphatase 3 OS=Homo sapiens OX=9606 GN=G6PC3 PE=1 SV=2		0	0	0	0	0	0	1358
Q9BUV8	Uncharacterized protein C20orf24	C20orf24	Uncharacterized protein RAB5IF OS=Homo sapiens OX=9606 GN=RAB5IF PE=2 SV=1		0	0	0	0	0	0	1359
Q9BV38	WD repeat-containing protein 18	WDR18	WD repeat-containing protein 18 OS=Homo sapiens OX=9606 GN=WDR18 PE=1 SV=2		0	0	0	0	0	0	1360
Q9BVG9	Phosphatidylserine synthase 2	PTDSS2	Phosphatidylserine synthase 2 OS=Homo sapiens OX=9606 GN=PTDSS2 PE=1 SV=1		0	0	0	0	0	0	1361
Q9BVK8	Transmembrane protein 147	TMEM147	Transmembrane protein 147 OS=Homo sapiens OX=9606 GN=TMEM147 PE=1 SV=1		0	0	0	0	0	0	1362
Q9BVM2	Protein DPCD	DPCD	Protein DPCD OS=Homo sapiens OX=9606 GN=DPCD PE=1 SV=2		0	0	0	0	0	0	1363
Q9BVQ7	Spermatogenesis-associated protein 5-like protein 1	SPATA5L1	Spermatogenesis-associated protein 5-like protein 1 OS=Homo sapiens OX=9606 GN=SPATA5L1 PE=1 SV=2		0	0	0	0	0	0	1364
Q9BVS4	Serine/threonine-protein kinase RIO2	RIOK2	Serine/threonine-protein kinase RIO2 OS=Homo sapiens OX=9606 GN=RIOK2 PE=1 SV=2		0	0	0	0	0	0	1365
Q9BVX2	Transmembrane protein 106C	TMEM106C	Transmembrane protein 106C OS=Homo sapiens OX=9606 GN=TMEM106C PE=1 SV=1		0	0	0	0	0	0	1366
Q9BW19	Kinesin-like protein KIFC1	KIFC1	Kinesin-like protein KIFC1 OS=Homo sapiens OX=9606 GN=KIFC1 PE=1 SV=2		0	0	0	0	0	0	1367
Q9BW27	Nuclear pore complex protein Nup85	NUP85	Nuclear pore complex protein Nup85 OS=Homo sapiens OX=9606 GN=NUP85 PE=1 SV=1		0	0	0	0	0	0	1368
Q9BW72	HIG1 domain family member 2A, mitochondrial	HIGD2A	HIG1 domain family member 2A, mitochondrial OS=Homo sapiens OX=9606 GN=HIGD2A PE=1 SV=1		0	0	0	0	0	0	1369
Q9BWE0	Replication initiator 1	REPIN1	Replication initiator 1 OS=Homo sapiens OX=9606 GN=REPIN1 PE=1 SV=1		0	0	0	0	0	0	1370
Q9BWH2	FUN14 domain-containing protein 2	FUNDC2	FUN14 domain-containing protein 2 OS=Homo sapiens OX=9606 GN=FUNDC2 PE=1 SV=2		0	0	0	0	0	0	1371
Q9BWJ5	Splicing factor 3B subunit 5	SF3B5	Splicing factor 3B subunit 5 OS=Homo sapiens OX=9606 GN=SF3B5 PE=1 SV=1		0	0	0	0	0	0	1372
Q9BWQ6	Protein YIPF2	YIPF2	Protein YIPF2 OS=Homo sapiens OX=9606 GN=YIPF2 PE=1 SV=1		0	0	0	0	0	0	1373
Q9BX73	TM2 domain-containing protein 2	TM2D2	TM2 domain-containing protein 2 OS=Homo sapiens OX=9606 GN=TM2D2 PE=2 SV=1		0	0	0	0	0	0	1374
Q9BX95	Sphingosine-1-phosphate phosphatase 1	SGPP1	Sphingosine-1-phosphate phosphatase 1 OS=Homo sapiens OX=9606 GN=SGPP1 PE=1 SV=2		0	0	0	0	0	0	1375
Q9BXF6	Rab11 family-interacting protein 5	RAB11FIP5	Rab11 family-interacting protein 5 OS=Homo sapiens OX=9606 GN=RAB11FIP5 PE=1 SV=1		0	0	0	0	0	0	1376
Q9BXP5	Serrate RNA effector molecule homolog	SRRT	Serrate RNA effector molecule homolog OS=Homo sapiens OX=9606 GN=SRRT PE=1 SV=1		0	0	0	0	0	0	1377
Q9BXS0	Collagen alpha-1(XXV) chain;Collagen-like Alzheimer amyloid plaque component	COL25A1	Collagen alpha-1(XXV) chain OS=Homo sapiens OX=9606 GN=COL25A1 PE=1 SV=2		0	0	0	0	0	0	1378
Q9BXS9	Solute carrier family 26 member 6	SLC26A6	Solute carrier family 26 member 6 OS=Homo sapiens OX=9606 GN=SLC26A6 PE=1 SV=1		0	0	0	0	0	0	1379
Q9BXW9	Fanconi anemia group D2 protein	FANCD2	Fanconi anemia group D2 protein OS=Homo sapiens OX=9606 GN=FANCD2 PE=1 SV=2		0	0	0	0	0	0	1380
Q9BY67	Cell adhesion molecule 1	CADM1	Cell adhesion molecule 1 OS=Homo sapiens OX=9606 GN=CADM1 PE=1 SV=2		0	0	0	0	0	0	1381
Q9BYJ9	YTH domain-containing family protein 1	YTHDF1	YTH domain-containing family protein 1 OS=Homo sapiens OX=9606 GN=YTHDF1 PE=1 SV=1		0	0	0	0	0	0	1382
Q9BZC7	ATP-binding cassette sub-family A member 2	ABCA2	ATP-binding cassette sub-family A member 2 OS=Homo sapiens OX=9606 GN=ABCA2 PE=1 SV=4		0	0	0	0	0	0	1383
Q9BZD4	Kinetochore protein Nuf2	NUF2	Kinetochore protein Nuf2 OS=Homo sapiens OX=9606 GN=NUF2 PE=1 SV=2		0	0	0	0	0	0	1384
Q9BZH6	WD repeat-containing protein 11	WDR11	WD repeat-containing protein 11 OS=Homo sapiens OX=9606 GN=WDR11 PE=1 SV=1		0	0	0	0	0	0	1385
Q9BZJ0	Crooked neck-like protein 1	CRNKL1	Crooked neck-like protein 1 OS=Homo sapiens OX=9606 GN=CRNKL1 PE=1 SV=4		0	0	0	0	0	0	1386
Q9BZL1	Ubiquitin-like protein 5	UBL5	Ubiquitin-like protein 5 OS=Homo sapiens OX=9606 GN=UBL5 PE=1 SV=1		0	0	0	0	0	0	1387
Q9BZM5;Q5VY80;Q6H3X3	NKG2D ligand 2;Retinoic acid early transcript 1L protein;Retinoic acid early transcript 1G protein	ULBP2;RAET1L;RAET1G	UL16-binding protein 2 OS=Homo sapiens OX=9606 GN=ULBP2 PE=1 SV=1;UL16-binding protein 6 OS=Homo sapiens OX=9606 GN=RAET1L PE=1 SV=1;UL-16 binding protein 5 OS=Homo sapiens OX=9606 GN=RAET1G PE=1 SV=1		0	0	0	0	0	0	1388
Q9C037	E3 ubiquitin-protein ligase TRIM4	TRIM4	E3 ubiquitin-protein ligase TRIM4 OS=Homo sapiens OX=9606 GN=TRIM4 PE=1 SV=2		0	0	0	0	0	0	1389
Q9C0B5	Palmitoyltransferase ZDHHC5	ZDHHC5	Palmitoyltransferase ZDHHC5 OS=Homo sapiens OX=9606 GN=ZDHHC5 PE=1 SV=2		0	0	0	0	0	0	1390
Q9C0D5	Protein TANC1	TANC1	Protein TANC1 OS=Homo sapiens OX=9606 GN=TANC1 PE=1 SV=3		0	0	0	0	0	0	1391
Q9C0H2	Protein tweety homolog 3	TTYH3	Protein tweety homolog 3 OS=Homo sapiens OX=9606 GN=TTYH3 PE=1 SV=3		0	0	0	0	0	0	1392
Q9C0J8	pre-mRNA 3 end processing protein WDR33	WDR33	pre-mRNA 3 end processing protein WDR33 OS=Homo sapiens OX=9606 GN=WDR33 PE=1 SV=2		0	0	0	0	0	0	1393
Q9C0K1	Zinc transporter ZIP8	SLC39A8	Zinc transporter ZIP8 OS=Homo sapiens OX=9606 GN=SLC39A8 PE=2 SV=1		0	0	0	0	0	0	1394
Q9GZP0	Platelet-derived growth factor D;Platelet-derived growth factor D, latent form;Platelet-derived growth factor D, receptor-binding form	PDGFD	Platelet-derived growth factor D OS=Homo sapiens OX=9606 GN=PDGFD PE=1 SV=1		0	0	0	0	0	0	1395
Q9GZP1	Neurensin-2	NRSN2	Neurensin-2 OS=Homo sapiens OX=9606 GN=NRSN2 PE=2 SV=1		0	0	0	0	0	0	1396
Q9GZR5	Elongation of very long chain fatty acids protein 4	ELOVL4	Elongation of very long chain fatty acids protein 4 OS=Homo sapiens OX=9606 GN=ELOVL4 PE=1 SV=1		0	0	0	0	0	0	1397
Q9GZS1	DNA-directed RNA polymerase I subunit RPA49	POLR1E	DNA-directed RNA polymerase I subunit RPA49 OS=Homo sapiens OX=9606 GN=POLR1E PE=1 SV=3		0	0	0	0	0	0	1398
Q9GZU1	Mucolipin-1	MCOLN1	Mucolipin-1 OS=Homo sapiens OX=9606 GN=MCOLN1 PE=1 SV=1		0	0	0	0	0	0	1399
Q9H074	Polyadenylate-binding protein-interacting protein 1	PAIP1	Polyadenylate-binding protein-interacting protein 1 OS=Homo sapiens OX=9606 GN=PAIP1 PE=1 SV=1		0	0	0	0	0	0	1400
Q9H078	Caseinolytic peptidase B protein homolog	CLPB	Caseinolytic peptidase B protein homolog OS=Homo sapiens OX=9606 GN=CLPB PE=1 SV=1		0	0	0	0	0	0	1401
Q9H081	Protein MIS12 homolog	MIS12	Protein MIS12 homolog OS=Homo sapiens OX=9606 GN=MIS12 PE=1 SV=1		0	0	0	0	0	0	1402
Q9H082	Ras-related protein Rab-33B	RAB33B	Ras-related protein Rab-33B OS=Homo sapiens OX=9606 GN=RAB33B PE=1 SV=1		0	0	0	0	0	0	1403
Q9H0C8	Integrin-linked kinase-associated serine/threonine phosphatase 2C	ILKAP	Integrin-linked kinase-associated serine/threonine phosphatase 2C OS=Homo sapiens OX=9606 GN=ILKAP PE=1 SV=1		0	0	0	0	0	0	1404
Q9H0J9	Poly [ADP-ribose] polymerase 12	PARP12	Protein mono-ADP-ribosyltransferase PARP12 OS=Homo sapiens OX=9606 GN=PARP12 PE=1 SV=1		0	0	0	0	0	0	1405
Q9H0P0	Cytosolic 5-nucleotidase 3A	NT5C3A	Cytosolic 5-nucleotidase 3A OS=Homo sapiens OX=9606 GN=NT5C3A PE=1 SV=3		0	0	0	0	0	0	1406
Q9H0R3	Transmembrane protein 222	TMEM222	Transmembrane protein 222 OS=Homo sapiens OX=9606 GN=TMEM222 PE=1 SV=2		0	0	0	0	0	0	1407
Q9H0U9	Testis-specific Y-encoded-like protein 1	TSPYL1	Testis-specific Y-encoded-like protein 1 OS=Homo sapiens OX=9606 GN=TSPYL1 PE=1 SV=3		0	0	0	0	0	0	1408
Q9H0V1	Transmembrane protein 168	TMEM168	Transmembrane protein 168 OS=Homo sapiens OX=9606 GN=TMEM168 PE=2 SV=2		0	0	0	0	0	0	1409
Q9H0W8	Protein SMG9	SMG9	Protein SMG9 OS=Homo sapiens OX=9606 GN=SMG9 PE=1 SV=1		0	0	0	0	0	0	1410
Q9H1A3	Methyltransferase-like protein 9	METTL9	Methyltransferase-like protein 9 OS=Homo sapiens OX=9606 GN=METTL9 PE=2 SV=1		0	0	0	0	0	0	1411
Q9H1C7	Cysteine-rich and transmembrane domain-containing protein 1	CYSTM1	Cysteine-rich and transmembrane domain-containing protein 1 OS=Homo sapiens OX=9606 GN=CYSTM1 PE=1 SV=1		0	0	0	0	0	0	1412
Q9H1I8	Activating signal cointegrator 1 complex subunit 2	ASCC2	Activating signal cointegrator 1 complex subunit 2 OS=Homo sapiens OX=9606 GN=ASCC2 PE=1 SV=3		0	0	0	0	0	0	1413
Q9H1Z4	WD repeat-containing protein 13	WDR13	WD repeat-containing protein 13 OS=Homo sapiens OX=9606 GN=WDR13 PE=1 SV=2		0	0	0	0	0	0	1414
Q9H267	Vacuolar protein sorting-associated protein 33B	VPS33B	Vacuolar protein sorting-associated protein 33B OS=Homo sapiens OX=9606 GN=VPS33B PE=1 SV=2		0	0	0	0	0	0	1415
Q9H2H9	Sodium-coupled neutral amino acid transporter 1	SLC38A1	Sodium-coupled neutral amino acid transporter 1 OS=Homo sapiens OX=9606 GN=SLC38A1 PE=1 SV=1		0	0	0	0	0	0	1416
Q9H2M9	Rab3 GTPase-activating protein non-catalytic subunit	RAB3GAP2	Rab3 GTPase-activating protein non-catalytic subunit OS=Homo sapiens OX=9606 GN=RAB3GAP2 PE=1 SV=1		0	0	0	0	0	0	1417
Q9H2U1	ATP-dependent RNA helicase DHX36	DHX36	ATP-dependent DNA/RNA helicase DHX36 OS=Homo sapiens OX=9606 GN=DHX36 PE=1 SV=2		0	0	0	0	0	0	1418
Q9H3K2	Growth hormone-inducible transmembrane protein	GHITM	Growth hormone-inducible transmembrane protein OS=Homo sapiens OX=9606 GN=GHITM PE=1 SV=2		0	0	0	0	0	0	1419
Q9H3P2	Negative elongation factor A	NELFA	Negative elongation factor A OS=Homo sapiens OX=9606 GN=NELFA PE=1 SV=3		0	0	0	0	0	0	1420
Q9H3R5	Centromere protein H	CENPH	Centromere protein H OS=Homo sapiens OX=9606 GN=CENPH PE=1 SV=1		0	0	0	0	0	0	1421
Q9H3S5	GPI mannosyltransferase 1	PIGM	GPI mannosyltransferase 1 OS=Homo sapiens OX=9606 GN=PIGM PE=1 SV=1		0	0	0	0	0	0	1422
Q9H3S7	Tyrosine-protein phosphatase non-receptor type 23	PTPN23	Tyrosine-protein phosphatase non-receptor type 23 OS=Homo sapiens OX=9606 GN=PTPN23 PE=1 SV=1		0	0	0	0	0	0	1423
Q9H3U1	Protein unc-45 homolog A	UNC45A	Protein unc-45 homolog A OS=Homo sapiens OX=9606 GN=UNC45A PE=1 SV=1		0	0	0	0	0	0	1424
Q9H3U5	Major facilitator superfamily domain-containing protein 1	MFSD1	Major facilitator superfamily domain-containing protein 1 OS=Homo sapiens OX=9606 GN=MFSD1 PE=2 SV=2		0	0	0	0	0	0	1425
Q9H4A3;Q96J92;Q9Y3S1	Serine/threonine-protein kinase WNK1;Serine/threonine-protein kinase WNK4;Serine/threonine-protein kinase WNK2	WNK1;WNK4;WNK2	Serine/threonine-protein kinase WNK1 OS=Homo sapiens OX=9606 GN=WNK1 PE=1 SV=2;Serine/threonine-protein kinase WNK4 OS=Homo sapiens OX=9606 GN=WNK4 PE=1 SV=1;Serine/threonine-protein kinase WNK2 OS=Homo sapiens OX=9606 GN=WNK2 PE=1 SV=4		0	0	0	0	0	0	1426
Q9H4A4	Aminopeptidase B	RNPEP	Aminopeptidase B OS=Homo sapiens OX=9606 GN=RNPEP PE=1 SV=2		0	0	0	0	0	0	1427
Q9H4B6	Protein salvador homolog 1	SAV1	Protein salvador homolog 1 OS=Homo sapiens OX=9606 GN=SAV1 PE=1 SV=2		0	0	0	0	0	0	1428
Q9H4F1	Alpha-N-acetyl-neuraminyl-2,3-beta-galactosyl-1,3-N-acetyl-galactosaminide alpha-2,6-sialyltransferase	ST6GALNAC4	Alpha-N-acetyl-neuraminyl-2,3-beta-galactosyl-1,3-N-acetyl-galactosaminide alpha-2,6-sialyltransferase OS=Homo sapiens OX=9606 GN=ST6GALNAC4 PE=2 SV=2		0	0	0	0	0	0	1429
Q9H4L5	Oxysterol-binding protein-related protein 3	OSBPL3	Oxysterol-binding protein-related protein 3 OS=Homo sapiens OX=9606 GN=OSBPL3 PE=1 SV=1		0	0	0	0	0	0	1430
Q9H5I5	Piezo-type mechanosensitive ion channel component 2	PIEZO2	Piezo-type mechanosensitive ion channel component 2 OS=Homo sapiens OX=9606 GN=PIEZO2 PE=1 SV=2		0	0	0	0	0	0	1431
Q9H5Q4	Dimethyladenosine transferase 2, mitochondrial	TFB2M	Dimethyladenosine transferase 2, mitochondrial OS=Homo sapiens OX=9606 GN=TFB2M PE=1 SV=1		0	0	0	0	0	0	1432
Q9H5X1	MIP18 family protein FAM96A	FAM96A	Cytosolic iron-sulfur assembly component 2A OS=Homo sapiens OX=9606 GN=CIAO2A PE=1 SV=1		0	0	0	0	0	0	1433
Q9H649	Putative methyltransferase NSUN3	NSUN3	tRNA (cytosine(34)-C(5))-methyltransferase, mitochondrial OS=Homo sapiens OX=9606 GN=NSUN3 PE=1 SV=1		0	0	0	0	0	0	1434
Q9H6R0	Putative ATP-dependent RNA helicase DHX33	DHX33	ATP-dependent RNA helicase DHX33 OS=Homo sapiens OX=9606 GN=DHX33 PE=1 SV=2		0	0	0	0	0	0	1435
Q9H6S0	Probable ATP-dependent RNA helicase YTHDC2	YTHDC2	3-5 RNA helicase YTHDC2 OS=Homo sapiens OX=9606 GN=YTHDC2 PE=1 SV=2		0	0	0	0	0	0	1436
Q9H6U8	Alpha-1,2-mannosyltransferase ALG9	ALG9	Alpha-1,2-mannosyltransferase ALG9 OS=Homo sapiens OX=9606 GN=ALG9 PE=1 SV=2		0	0	0	0	0	0	1437
Q9H7D0	Dedicator of cytokinesis protein 5	DOCK5	Dedicator of cytokinesis protein 5 OS=Homo sapiens OX=9606 GN=DOCK5 PE=1 SV=3		0	0	0	0	0	0	1438
Q9H7F0	Probable cation-transporting ATPase 13A3	ATP13A3	Probable cation-transporting ATPase 13A3 OS=Homo sapiens OX=9606 GN=ATP13A3 PE=1 SV=4		0	0	0	0	0	0	1439
Q9H813	Transmembrane protein 206	TMEM206	Proton-activated chloride channel OS=Homo sapiens OX=9606 GN=PACC1 PE=1 SV=1		0	0	0	0	0	0	1440
Q9H8H0	Nucleolar protein 11	NOL11	Nucleolar protein 11 OS=Homo sapiens OX=9606 GN=NOL11 PE=1 SV=1		0	0	0	0	0	0	1441
Q9H8H3	Methyltransferase-like protein 7A	METTL7A	Methyltransferase-like protein 7A OS=Homo sapiens OX=9606 GN=METTL7A PE=1 SV=1		0	0	0	0	0	0	1442
Q9H8M1;Q96MF6	Coenzyme Q-binding protein COQ10 homolog B, mitochondrial	COQ10B	Coenzyme Q-binding protein COQ10 homolog B, mitochondrial OS=Homo sapiens OX=9606 GN=COQ10B PE=2 SV=1		0	0	0	0	0	0	1443
Q9H944	Mediator of RNA polymerase II transcription subunit 20	MED20	Mediator of RNA polymerase II transcription subunit 20 OS=Homo sapiens OX=9606 GN=MED20 PE=1 SV=1		0	0	0	0	0	0	1444
Q9H981	Actin-related protein 8	ACTR8	Actin-related protein 8 OS=Homo sapiens OX=9606 GN=ACTR8 PE=1 SV=2		0	0	0	0	0	0	1445
Q9H9A5	CCR4-NOT transcription complex subunit 10	CNOT10	CCR4-NOT transcription complex subunit 10 OS=Homo sapiens OX=9606 GN=CNOT10 PE=1 SV=1		0	0	0	0	0	0	1446
Q9H9A6	Leucine-rich repeat-containing protein 40	LRRC40	Leucine-rich repeat-containing protein 40 OS=Homo sapiens OX=9606 GN=LRRC40 PE=1 SV=1		0	0	0	0	0	0	1447
Q9UKV8;Q9H9G7;Q9UL18;Q9HCK5	Protein argonaute-2;Protein argonaute-3;Protein argonaute-1;Protein argonaute-4	AGO2;AGO3;AGO1;AGO4	Protein argonaute-2 OS=Homo sapiens OX=9606 GN=AGO2 PE=1 SV=3;Protein argonaute-3 OS=Homo sapiens OX=9606 GN=AGO3 PE=1 SV=2;Protein argonaute-1 OS=Homo sapiens OX=9606 GN=AGO1 PE=1 SV=3;Protein argonaute-4 OS=Homo sapiens OX=9606 GN=AGO4 PE=1 SV=2		0	0	0	0	0	0	1448
Q9H9L3	Interferon-stimulated 20 kDa exonuclease-like 2	ISG20L2	Interferon-stimulated 20 kDa exonuclease-like 2 OS=Homo sapiens OX=9606 GN=ISG20L2 PE=1 SV=1		0	0	0	0	0	0	1449
Q9H9Q4	Non-homologous end-joining factor 1	NHEJ1	Non-homologous end-joining factor 1 OS=Homo sapiens OX=9606 GN=NHEJ1 PE=1 SV=1		0	0	0	0	0	0	1450
Q9H9S5	Fukutin-related protein	FKRP	Fukutin-related protein OS=Homo sapiens OX=9606 GN=FKRP PE=1 SV=1		0	0	0	0	0	0	1451
Q9H9T3	Elongator complex protein 3	ELP3	Elongator complex protein 3 OS=Homo sapiens OX=9606 GN=ELP3 PE=1 SV=2		0	0	0	0	0	0	1452
Q9H9Y6	DNA-directed RNA polymerase I subunit RPA2	POLR1B	DNA-directed RNA polymerase I subunit RPA2 OS=Homo sapiens OX=9606 GN=POLR1B PE=1 SV=2		0	0	0	0	0	0	1453
Q9HA64	Ketosamine-3-kinase	FN3KRP	Ketosamine-3-kinase OS=Homo sapiens OX=9606 GN=FN3KRP PE=1 SV=2		0	0	0	0	0	0	1454
Q9HAB3	Solute carrier family 52, riboflavin transporter, member 2	SLC52A2	Solute carrier family 52, riboflavin transporter, member 2 OS=Homo sapiens OX=9606 GN=SLC52A2 PE=1 SV=1		0	0	0	0	0	0	1455
Q9HAK2	Transcription factor COE2	EBF2	Transcription factor COE2 OS=Homo sapiens OX=9606 GN=EBF2 PE=2 SV=4		0	0	0	0	0	0	1456
Q9HAS0	Protein Njmu-R1	C17orf75	Protein Njmu-R1 OS=Homo sapiens OX=9606 GN=C17orf75 PE=1 SV=2		0	0	0	0	0	0	1457
Q9HAV0	Guanine nucleotide-binding protein subunit beta-4	GNB4	Guanine nucleotide-binding protein subunit beta-4 OS=Homo sapiens OX=9606 GN=GNB4 PE=1 SV=3		0	0	0	0	0	0	1458
Q9HAV4	Exportin-5	XPO5	Exportin-5 OS=Homo sapiens OX=9606 GN=XPO5 PE=1 SV=1		0	0	0	0	0	0	1459
Q9HB58	Sp110 nuclear body protein	SP110	Sp110 nuclear body protein OS=Homo sapiens OX=9606 GN=SP110 PE=1 SV=5		0	0	0	0	0	0	1460
Q9HBI1	Beta-parvin	PARVB	Beta-parvin OS=Homo sapiens OX=9606 GN=PARVB PE=1 SV=1		0	0	0	0	0	0	1461
Q9HC35	Echinoderm microtubule-associated protein-like 4	EML4	Echinoderm microtubule-associated protein-like 4 OS=Homo sapiens OX=9606 GN=EML4 PE=1 SV=3		0	0	0	0	0	0	1462
Q9HC98	Serine/threonine-protein kinase Nek6	NEK6	Serine/threonine-protein kinase Nek6 OS=Homo sapiens OX=9606 GN=NEK6 PE=1 SV=2		0	0	0	0	0	0	1463
Q9HCE1	Putative helicase MOV-10	MOV10	Helicase MOV-10 OS=Homo sapiens OX=9606 GN=MOV10 PE=1 SV=2		0	0	0	0	0	0	1464
Q9HCG8	Pre-mRNA-splicing factor CWC22 homolog	CWC22	Pre-mRNA-splicing factor CWC22 homolog OS=Homo sapiens OX=9606 GN=CWC22 PE=1 SV=3		0	0	0	0	0	0	1465
Q9HCJ1	Progressive ankylosis protein homolog	ANKH	Progressive ankylosis protein homolog OS=Homo sapiens OX=9606 GN=ANKH PE=1 SV=2		0	0	0	0	0	0	1466
Q9HCK8;Q3L8U1;Q9P2D1;Q8TD26	Chromodomain-helicase-DNA-binding protein 8;Chromodomain-helicase-DNA-binding protein 9;Chromodomain-helicase-DNA-binding protein 7	CHD8;CHD9;CHD7	Chromodomain-helicase-DNA-binding protein 8 OS=Homo sapiens OX=9606 GN=CHD8 PE=1 SV=5;Chromodomain-helicase-DNA-binding protein 9 OS=Homo sapiens OX=9606 GN=CHD9 PE=1 SV=2;Chromodomain-helicase-DNA-binding protein 7 OS=Homo sapiens OX=9606 GN=CHD7 PE=1 SV=		0	0	0	0	0	0	1467
Q9HCS7	Pre-mRNA-splicing factor SYF1	XAB2	Pre-mRNA-splicing factor SYF1 OS=Homo sapiens OX=9606 GN=XAB2 PE=1 SV=2		0	0	0	0	0	0	1468
Q9HD34	LYR motif-containing protein 4	LYRM4	LYR motif-containing protein 4 OS=Homo sapiens OX=9606 GN=LYRM4 PE=1 SV=1		0	0	0	0	0	0	1469
Q9HD67	Unconventional myosin-X	MYO10	Unconventional myosin-X OS=Homo sapiens OX=9606 GN=MYO10 PE=1 SV=3		0	0	0	0	0	0	1470
Q9NP61	ADP-ribosylation factor GTPase-activating protein 3	ARFGAP3	ADP-ribosylation factor GTPase-activating protein 3 OS=Homo sapiens OX=9606 GN=ARFGAP3 PE=1 SV=1		0	0	0	0	0	0	1471
Q9NP79	Vacuolar protein sorting-associated protein VTA1 homolog	VTA1	Vacuolar protein sorting-associated protein VTA1 homolog OS=Homo sapiens OX=9606 GN=VTA1 PE=1 SV=1		0	0	0	0	0	0	1472
Q9NPA8	Transcription and mRNA export factor ENY2	ENY2	Transcription and mRNA export factor ENY2 OS=Homo sapiens OX=9606 GN=ENY2 PE=1 SV=1		0	0	0	0	0	0	1473
Q9NPD5	Solute carrier organic anion transporter family member 1B3	SLCO1B3	Solute carrier organic anion transporter family member 1B3 OS=Homo sapiens OX=9606 GN=SLCO1B3 PE=1 SV=1		0	0	0	0	0	0	1474
Q9NPF0	CD320 antigen	CD320	CD320 antigen OS=Homo sapiens OX=9606 GN=CD320 PE=1 SV=1		0	0	0	0	0	0	1475
Q9NPJ3	Acyl-coenzyme A thioesterase 13;Acyl-coenzyme A thioesterase 13, N-terminally processed	ACOT13	Acyl-coenzyme A thioesterase 13 OS=Homo sapiens OX=9606 GN=ACOT13 PE=1 SV=1		0	0	0	0	0	0	1476
Q9NPL8	Complex I assembly factor TIMMDC1, mitochondrial	TIMMDC1	Complex I assembly factor TIMMDC1, mitochondrial OS=Homo sapiens OX=9606 GN=TIMMDC1 PE=1 SV=2		0	0	0	0	0	0	1477
Q9NQ34	Transmembrane protein 9B	TMEM9B	Transmembrane protein 9B OS=Homo sapiens OX=9606 GN=TMEM9B PE=1 SV=1		0	0	0	0	0	0	1478
Q9NQ75	Cas scaffolding protein family member 4	CASS4	Cas scaffolding protein family member 4 OS=Homo sapiens OX=9606 GN=CASS4 PE=1 SV=2		0	0	0	0	0	0	1479
Q9NQS1	Cell death regulator Aven	AVEN	Cell death regulator Aven OS=Homo sapiens OX=9606 GN=AVEN PE=1 SV=1		0	0	0	0	0	0	1480
Q9NQS3	Nectin-3	PVRL3	Nectin-3 OS=Homo sapiens OX=9606 GN=NECTIN3 PE=1 SV=1		0	0	0	0	0	0	1481
Q9NQT4	Exosome complex component RRP46	EXOSC5	Exosome complex component RRP46 OS=Homo sapiens OX=9606 GN=EXOSC5 PE=1 SV=1		0	0	0	0	0	0	1482
Q9NQT8	Kinesin-like protein KIF13B	KIF13B	Kinesin-like protein KIF13B OS=Homo sapiens OX=9606 GN=KIF13B PE=1 SV=2		0	0	0	0	0	0	1483
Q9NRG7	Epimerase family protein SDR39U1	SDR39U1	Epimerase family protein SDR39U1 OS=Homo sapiens OX=9606 GN=SDR39U1 PE=1 SV=3		0	0	0	0	0	0	1484
Q9NRL2	Bromodomain adjacent to zinc finger domain protein 1A	BAZ1A	Bromodomain adjacent to zinc finger domain protein 1A OS=Homo sapiens OX=9606 GN=BAZ1A PE=1 SV=2		0	0	0	0	0	0	1485
Q9NRR3	CDC42 small effector protein 2	CDC42SE2	CDC42 small effector protein 2 OS=Homo sapiens OX=9606 GN=CDC42SE2 PE=1 SV=1		0	0	0	0	0	0	1486
Q9NRR4	Ribonuclease 3	DROSHA	Ribonuclease 3 OS=Homo sapiens OX=9606 GN=DROSHA PE=1 SV=2		0	0	0	0	0	0	1487
Q9NRX1	RNA-binding protein PNO1	PNO1	RNA-binding protein PNO1 OS=Homo sapiens OX=9606 GN=PNO1 PE=1 SV=1		0	0	0	0	0	0	1488
Q9NRY6	Phospholipid scramblase 3	PLSCR3	Phospholipid scramblase 3 OS=Homo sapiens OX=9606 GN=PLSCR3 PE=1 SV=2		0	0	0	0	0	0	1489
Q9NRZ9	Lymphoid-specific helicase	HELLS	Lymphoid-specific helicase OS=Homo sapiens OX=9606 GN=HELLS PE=1 SV=1		0	0	0	0	0	0	1490
Q9NSE4	Isoleucine--tRNA ligase, mitochondrial	IARS2	Isoleucine--tRNA ligase, mitochondrial OS=Homo sapiens OX=9606 GN=IARS2 PE=1 SV=2		0	0	0	0	0	0	1491
Q9NSV4	Protein diaphanous homolog 3	DIAPH3	Protein diaphanous homolog 3 OS=Homo sapiens OX=9606 GN=DIAPH3 PE=1 SV=4		0	0	0	0	0	0	1492
Q9NTI5	Sister chromatid cohesion protein PDS5 homolog B	PDS5B	Sister chromatid cohesion protein PDS5 homolog B OS=Homo sapiens OX=9606 GN=PDS5B PE=1 SV=1		0	0	0	0	0	0	1493
Q9NTK5	Obg-like ATPase 1	OLA1	Obg-like ATPase 1 OS=Homo sapiens OX=9606 GN=OLA1 PE=1 SV=2		0	0	0	0	0	0	1494
Q9NTZ6	RNA-binding protein 12	RBM12	RNA-binding protein 12 OS=Homo sapiens OX=9606 GN=RBM12 PE=1 SV=1		0	0	0	0	0	0	1495
Q9NU22	Midasin	MDN1	Midasin OS=Homo sapiens OX=9606 GN=MDN1 PE=1 SV=2		0	0	0	0	0	0	1496
Q9NU53	Glycoprotein integral membrane protein 1	GINM1	Glycoprotein integral membrane protein 1 OS=Homo sapiens OX=9606 GN=GINM1 PE=2 SV=1		0	0	0	0	0	0	1497
Q9NUL7	Probable ATP-dependent RNA helicase DDX28	DDX28	Probable ATP-dependent RNA helicase DDX28 OS=Homo sapiens OX=9606 GN=DDX28 PE=1 SV=2		0	0	0	0	0	0	1498
Q9NUN5	Probable lysosomal cobalamin transporter	LMBRD1	Probable lysosomal cobalamin transporter OS=Homo sapiens OX=9606 GN=LMBRD1 PE=1 SV=1		0	0	0	0	0	0	1499
Q9NUQ2	1-acyl-sn-glycerol-3-phosphate acyltransferase epsilon	AGPAT5	1-acyl-sn-glycerol-3-phosphate acyltransferase epsilon OS=Homo sapiens OX=9606 GN=AGPAT5 PE=1 SV=3		0	0	0	0	0	0	1500
Q9NUQ6	SPATS2-like protein	SPATS2L	SPATS2-like protein OS=Homo sapiens OX=9606 GN=SPATS2L PE=1 SV=2		0	0	0	0	0	0	1501
Q9NUQ7	Ufm1-specific protease 2	UFSP2	Ufm1-specific protease 2 OS=Homo sapiens OX=9606 GN=UFSP2 PE=1 SV=3		0	0	0	0	0	0	1502
Q9NUQ8	ATP-binding cassette sub-family F member 3	ABCF3	ATP-binding cassette sub-family F member 3 OS=Homo sapiens OX=9606 GN=ABCF3 PE=1 SV=2		0	0	0	0	0	0	1503
Q9NUU7;Q9UMR2	ATP-dependent RNA helicase DDX19A;ATP-dependent RNA helicase DDX19B	DDX19A;DDX19B	ATP-dependent RNA helicase DDX19A OS=Homo sapiens OX=9606 GN=DDX19A PE=1 SV=1;ATP-dependent RNA helicase DDX19B OS=Homo sapiens OX=9606 GN=DDX19B PE=1 SV=1		0	0	0	0	0	0	1504
Q9NUW8	Tyrosyl-DNA phosphodiesterase 1	TDP1	Tyrosyl-DNA phosphodiesterase 1 OS=Homo sapiens OX=9606 GN=TDP1 PE=1 SV=2		0	0	0	0	0	0	1505
Q9NV31	U3 small nucleolar ribonucleoprotein protein IMP3	IMP3	U3 small nucleolar ribonucleoprotein protein IMP3 OS=Homo sapiens OX=9606 GN=IMP3 PE=1 SV=1		0	0	0	0	0	0	1506
Q9NV96;Q3MIR4	Cell cycle control protein 50A	TMEM30A	Cell cycle control protein 50A OS=Homo sapiens OX=9606 GN=TMEM30A PE=1 SV=1		0	0	0	0	0	0	1507
Q9NVA4	Transmembrane protein 184C	TMEM184C	Transmembrane protein 184C OS=Homo sapiens OX=9606 GN=TMEM184C PE=1 SV=2		0	0	0	0	0	0	1508
Q9NVH0	Exonuclease 3-5 domain-containing protein 2	EXD2	Exonuclease 3-5 domain-containing protein 2 OS=Homo sapiens OX=9606 GN=EXD2 PE=1 SV=2		0	0	0	0	0	0	1509
Q9NVH2	Integrator complex subunit 7	INTS7	Integrator complex subunit 7 OS=Homo sapiens OX=9606 GN=INTS7 PE=1 SV=1		0	0	0	0	0	0	1510
Q9NVI1	Fanconi anemia group I protein	FANCI	Fanconi anemia group I protein OS=Homo sapiens OX=9606 GN=FANCI PE=1 SV=4		0	0	0	0	0	0	1511
Q9NVN8	Guanine nucleotide-binding protein-like 3-like protein	GNL3L	Guanine nucleotide-binding protein-like 3-like protein OS=Homo sapiens OX=9606 GN=GNL3L PE=1 SV=1		0	0	0	0	0	0	1512
Q9NVR0	Kelch-like protein 11	KLHL11	Kelch-like protein 11 OS=Homo sapiens OX=9606 GN=KLHL11 PE=1 SV=1		0	0	0	0	0	0	1513
Q9NVV0	Trimeric intracellular cation channel type B	TMEM38B	Trimeric intracellular cation channel type B OS=Homo sapiens OX=9606 GN=TMEM38B PE=1 SV=1		0	0	0	0	0	0	1514
Q9NVV4	Poly(A) RNA polymerase, mitochondrial	MTPAP	Poly(A) RNA polymerase, mitochondrial OS=Homo sapiens OX=9606 GN=MTPAP PE=1 SV=1		0	0	0	0	0	0	1515
Q9NVV5	Androgen-induced gene 1 protein	AIG1	Androgen-induced gene 1 protein OS=Homo sapiens OX=9606 GN=AIG1 PE=1 SV=2		0	0	0	0	0	0	1516
Q9NVX2	Notchless protein homolog 1	NLE1	Notchless protein homolog 1 OS=Homo sapiens OX=9606 GN=NLE1 PE=1 SV=4		0	0	0	0	0	0	1517
Q9NW08	DNA-directed RNA polymerase III subunit RPC2	POLR3B	DNA-directed RNA polymerase III subunit RPC2 OS=Homo sapiens OX=9606 GN=POLR3B PE=1 SV=2		0	0	0	0	0	0	1518
Q9NWT8	Aurora kinase A-interacting protein	AURKAIP1	Aurora kinase A-interacting protein OS=Homo sapiens OX=9606 GN=AURKAIP1 PE=1 SV=1		0	0	0	0	0	0	1519
Q9NWZ8	Gem-associated protein 8	GEMIN8	Gem-associated protein 8 OS=Homo sapiens OX=9606 GN=GEMIN8 PE=1 SV=1		0	0	0	0	0	0	1520
Q9NX04	Uncharacterized protein C1orf109	C1orf109	Uncharacterized protein C1orf109 OS=Homo sapiens OX=9606 GN=C1orf109 PE=1 SV=1		0	0	0	0	0	0	1521
Q9NX47	E3 ubiquitin-protein ligase MARCH5	2022-03-05	E3 ubiquitin-protein ligase MARCH5 OS=Homo sapiens OX=9606 GN=MARCH5 PE=1 SV=1		0	0	0	0	0	0	1522
Q9NX63	MICOS complex subunit MIC19	CHCHD3	MICOS complex subunit MIC19 OS=Homo sapiens OX=9606 GN=CHCHD3 PE=1 SV=1		0	0	0	0	0	0	1523
Q9NXG2	THUMP domain-containing protein 1	THUMPD1	THUMP domain-containing protein 1 OS=Homo sapiens OX=9606 GN=THUMPD1 PE=1 SV=2		0	0	0	0	0	0	1524
Q9NXR7	BRCA1-A complex subunit BRE	BRE	BRISC and BRCA1-A complex member 2 OS=Homo sapiens OX=9606 GN=BABAM2 PE=1 SV=2		0	0	0	0	0	0	1525
Q9NXV6	CDKN2A-interacting protein	CDKN2AIP	CDKN2A-interacting protein OS=Homo sapiens OX=9606 GN=CDKN2AIP PE=1 SV=3		0	0	0	0	0	0	1526
Q9NXW2	DnaJ homolog subfamily B member 12	DNAJB12	DnaJ homolog subfamily B member 12 OS=Homo sapiens OX=9606 GN=DNAJB12 PE=1 SV=5		0	0	0	0	0	0	1527
Q9NY26	Zinc transporter ZIP1	SLC39A1	Zinc transporter ZIP1 OS=Homo sapiens OX=9606 GN=SLC39A1 PE=1 SV=1		0	0	0	0	0	0	1528
Q9NY61	Protein AATF	AATF	Protein AATF OS=Homo sapiens OX=9606 GN=AATF PE=1 SV=1		0	0	0	0	0	0	1529
Q9NYG2	Palmitoyltransferase ZDHHC3	ZDHHC3	Palmitoyltransferase ZDHHC3 OS=Homo sapiens OX=9606 GN=ZDHHC3 PE=1 SV=2		0	0	0	0	0	0	1530
Q9NYH9	U3 small nucleolar RNA-associated protein 6 homolog	UTP6	U3 small nucleolar RNA-associated protein 6 homolog OS=Homo sapiens OX=9606 GN=UTP6 PE=2 SV=2		0	0	0	0	0	0	1531
Q9NZ32	Actin-related protein 10	ACTR10	Actin-related protein 10 OS=Homo sapiens OX=9606 GN=ACTR10 PE=1 SV=1		0	0	0	0	0	0	1532
Q9NZC3	Glycerophosphodiester phosphodiesterase 1	GDE1	Glycerophosphodiester phosphodiesterase 1 OS=Homo sapiens OX=9606 GN=GDE1 PE=1 SV=1		0	0	0	0	0	0	1533
Q9NZM5	Glioma tumor suppressor candidate region gene 2 protein	GLTSCR2	Ribosome biogenesis protein NOP53 OS=Homo sapiens OX=9606 GN=NOP53 PE=1 SV=2		0	0	0	0	0	0	1534
Q9NZT2	Opioid growth factor receptor	OGFR	Opioid growth factor receptor OS=Homo sapiens OX=9606 GN=OGFR PE=1 SV=3		0	0	0	0	0	0	1535
Q9NZV1	Cysteine-rich motor neuron 1 protein;Processed cysteine-rich motor neuron 1 protein	CRIM1	Cysteine-rich motor neuron 1 protein OS=Homo sapiens OX=9606 GN=CRIM1 PE=1 SV=1		0	0	0	0	0	0	1536
Q9P003	Protein cornichon homolog 4	CNIH4	Protein cornichon homolog 4 OS=Homo sapiens OX=9606 GN=CNIH4 PE=1 SV=1		0	0	0	0	0	0	1537
Q9P0K7	Ankycorbin	RAI14	Ankycorbin OS=Homo sapiens OX=9606 GN=RAI14 PE=1 SV=2		0	0	0	0	0	0	1538
Q9P0U1	Mitochondrial import receptor subunit TOM7 homolog	TOMM7	Mitochondrial import receptor subunit TOM7 homolog OS=Homo sapiens OX=9606 GN=TOMM7 PE=1 SV=1		0	0	0	0	0	0	1539
Q9P265;Q14689	Disco-interacting protein 2 homolog B	DIP2B	Disco-interacting protein 2 homolog B OS=Homo sapiens OX=9606 GN=DIP2B PE=1 SV=3		0	0	0	0	0	0	1540
Q9P2E5	Chondroitin sulfate glucuronyltransferase	CHPF2	Chondroitin sulfate glucuronyltransferase OS=Homo sapiens OX=9606 GN=CHPF2 PE=2 SV=2		0	0	0	0	0	0	1541
Q9P2N7;Q9P2J3	Kelch-like protein 13;Kelch-like protein 9	KLHL13;KLHL9	Kelch-like protein 13 OS=Homo sapiens OX=9606 GN=KLHL13 PE=1 SV=3;Kelch-like protein 9 OS=Homo sapiens OX=9606 GN=KLHL9 PE=1 SV=2		0	0	0	0	0	0	1542
Q9P2P6	StAR-related lipid transfer protein 9	STARD9	StAR-related lipid transfer protein 9 OS=Homo sapiens OX=9606 GN=STARD9 PE=1 SV=3		0	0	0	0	0	0	1543
Q9P2R3	Rabankyrin-5	ANKFY1	Rabankyrin-5 OS=Homo sapiens OX=9606 GN=ANKFY1 PE=1 SV=2		0	0	0	0	0	0	1544
Q9UBB4	Ataxin-10	ATXN10	Ataxin-10 OS=Homo sapiens OX=9606 GN=ATXN10 PE=1 SV=1		0	0	0	0	0	0	1545
Q9UBB9	Tuftelin-interacting protein 11	TFIP11	Tuftelin-interacting protein 11 OS=Homo sapiens OX=9606 GN=TFIP11 PE=1 SV=1		0	0	0	0	0	0	1546
Q9UBF2	Coatomer subunit gamma-2	COPG2	Coatomer subunit gamma-2 OS=Homo sapiens OX=9606 GN=COPG2 PE=1 SV=1		0	0	0	0	0	0	1547
Q9UBH6	Xenotropic and polytropic retrovirus receptor 1	XPR1	Xenotropic and polytropic retrovirus receptor 1 OS=Homo sapiens OX=9606 GN=XPR1 PE=1 SV=1		0	0	0	0	0	0	1548
Q9UBM1	Phosphatidylethanolamine N-methyltransferase	PEMT	Phosphatidylethanolamine N-methyltransferase OS=Homo sapiens OX=9606 GN=PEMT PE=1 SV=4		0	0	0	0	0	0	1549
Q9UBQ5	Eukaryotic translation initiation factor 3 subunit K	EIF3K	Eukaryotic translation initiation factor 3 subunit K OS=Homo sapiens OX=9606 GN=EIF3K PE=1 SV=1		0	0	0	0	0	0	1550
Q9UBV2	Protein sel-1 homolog 1	SEL1L	Protein sel-1 homolog 1 OS=Homo sapiens OX=9606 GN=SEL1L PE=1 SV=3		0	0	0	0	0	0	1551
Q9UBV7	Beta-1,4-galactosyltransferase 7;Xylosylprotein 4-beta-galactosyltransferase	B4GALT7	Beta-1,4-galactosyltransferase 7 OS=Homo sapiens OX=9606 GN=B4GALT7 PE=1 SV=1		0	0	0	0	0	0	1552
Q9UBW8	COP9 signalosome complex subunit 7a	COPS7A	COP9 signalosome complex subunit 7a OS=Homo sapiens OX=9606 GN=COPS7A PE=1 SV=1		0	0	0	0	0	0	1553
Q9UEY8	Gamma-adducin	ADD3	Gamma-adducin OS=Homo sapiens OX=9606 GN=ADD3 PE=1 SV=1		0	0	0	0	0	0	1554
Q9UFC0	Leucine-rich repeat and WD repeat-containing protein 1	LRWD1	Leucine-rich repeat and WD repeat-containing protein 1 OS=Homo sapiens OX=9606 GN=LRWD1 PE=1 SV=2		0	0	0	0	0	0	1555
Q9UFN0	Protein NipSnap homolog 3A	NIPSNAP3A	Protein NipSnap homolog 3A OS=Homo sapiens OX=9606 GN=NIPSNAP3A PE=1 SV=2		0	0	0	0	0	0	1556
Q9UGM6	Tryptophan--tRNA ligase, mitochondrial	WARS2	Tryptophan--tRNA ligase, mitochondrial OS=Homo sapiens OX=9606 GN=WARS2 PE=1 SV=1		0	0	0	0	0	0	1557
Q9UGN5	Poly [ADP-ribose] polymerase 2	PARP2	Poly [ADP-ribose] polymerase 2 OS=Homo sapiens OX=9606 GN=PARP2 PE=1 SV=2		0	0	0	0	0	0	1558
Q9UGQ3	Solute carrier family 2, facilitated glucose transporter member 6	SLC2A6	Solute carrier family 2, facilitated glucose transporter member 6 OS=Homo sapiens OX=9606 GN=SLC2A6 PE=1 SV=2		0	0	0	0	0	0	1559
Q9UGR2	Zinc finger CCCH domain-containing protein 7B	ZC3H7B	Zinc finger CCCH domain-containing protein 7B OS=Homo sapiens OX=9606 GN=ZC3H7B PE=1 SV=2		0	0	0	0	0	0	1560
Q9UHI6	Probable ATP-dependent RNA helicase DDX20	DDX20	Probable ATP-dependent RNA helicase DDX20 OS=Homo sapiens OX=9606 GN=DDX20 PE=1 SV=2		0	0	0	0	0	0	1561
Q9UHK6	Alpha-methylacyl-CoA racemase	AMACR	Alpha-methylacyl-CoA racemase OS=Homo sapiens OX=9606 GN=AMACR PE=1 SV=2		0	0	0	0	0	0	1562
Q9UHN6;Q86WI1	Transmembrane protein 2	TMEM2	Cell surface hyaluronidase OS=Homo sapiens OX=9606 GN=CEMIP2 PE=1 SV=1		0	0	0	0	0	0	1563
Q9UHW9	Solute carrier family 12 member 6	SLC12A6	Solute carrier family 12 member 6 OS=Homo sapiens OX=9606 GN=SLC12A6 PE=1 SV=2		0	0	0	0	0	0	1564
Q9UI14	Prenylated Rab acceptor protein 1	RABAC1	Prenylated Rab acceptor protein 1 OS=Homo sapiens OX=9606 GN=RABAC1 PE=1 SV=1		0	0	0	0	0	0	1565
Q9UID3	Vacuolar protein sorting-associated protein 51 homolog	VPS51	Vacuolar protein sorting-associated protein 51 homolog OS=Homo sapiens OX=9606 GN=VPS51 PE=1 SV=2		0	0	0	0	0	0	1566
Q9UIG8	Solute carrier organic anion transporter family member 3A1	SLCO3A1	Solute carrier organic anion transporter family member 3A1 OS=Homo sapiens OX=9606 GN=SLCO3A1 PE=1 SV=3		0	0	0	0	0	0	1567
Q9UIQ6	Leucyl-cystinyl aminopeptidase;Leucyl-cystinyl aminopeptidase, pregnancy serum form	LNPEP	Leucyl-cystinyl aminopeptidase OS=Homo sapiens OX=9606 GN=LNPEP PE=1 SV=3		0	0	0	0	0	0	1568
Q9UIV1	CCR4-NOT transcription complex subunit 7	CNOT7	CCR4-NOT transcription complex subunit 7 OS=Homo sapiens OX=9606 GN=CNOT7 PE=1 SV=3		0	0	0	0	0	0	1569
Q9UJF2	Ras GTPase-activating protein nGAP	RASAL2	Ras GTPase-activating protein nGAP OS=Homo sapiens OX=9606 GN=RASAL2 PE=1 SV=2		0	0	0	0	0	0	1570
Q9UJG1	Motile sperm domain-containing protein 1	MOSPD1	Motile sperm domain-containing protein 1 OS=Homo sapiens OX=9606 GN=MOSPD1 PE=2 SV=1		0	0	0	0	0	0	1571
Q9UJK0	Ribosome biogenesis protein TSR3 homolog	TSR3	Ribosome biogenesis protein TSR3 homolog OS=Homo sapiens OX=9606 GN=TSR3 PE=1 SV=1		0	0	0	0	0	0	1572
Q9UJT1	Tubulin delta chain	TUBD1	Tubulin delta chain OS=Homo sapiens OX=9606 GN=TUBD1 PE=2 SV=2		0	0	0	0	0	0	1573
Q9UJV9	Probable ATP-dependent RNA helicase DDX41	DDX41	Probable ATP-dependent RNA helicase DDX41 OS=Homo sapiens OX=9606 GN=DDX41 PE=1 SV=2		0	0	0	0	0	0	1574
Q9UJW0	Dynactin subunit 4	DCTN4	Dynactin subunit 4 OS=Homo sapiens OX=9606 GN=DCTN4 PE=1 SV=1		0	0	0	0	0	0	1575
Q9UK61	Protein FAM208A	FAM208A	Protein TASOR OS=Homo sapiens OX=9606 GN=TASOR PE=1 SV=3		0	0	0	0	0	0	1576
Q9UKA9	Polypyrimidine tract-binding protein 2	PTBP2	Polypyrimidine tract-binding protein 2 OS=Homo sapiens OX=9606 GN=PTBP2 PE=1 SV=1		0	0	0	0	0	0	1577
Q9UKF6	Cleavage and polyadenylation specificity factor subunit 3	CPSF3	Cleavage and polyadenylation specificity factor subunit 3 OS=Homo sapiens OX=9606 GN=CPSF3 PE=1 SV=1		0	0	0	0	0	0	1578
Q9UKK3	Poly [ADP-ribose] polymerase 4	PARP4	Protein mono-ADP-ribosyltransferase PARP4 OS=Homo sapiens OX=9606 GN=PARP4 PE=1 SV=3		0	0	0	0	0	0	1579
Q9UKR5	Probable ergosterol biosynthetic protein 28	C14orf1	Probable ergosterol biosynthetic protein 28 OS=Homo sapiens OX=9606 GN=ERG28 PE=1 SV=1		0	0	0	0	0	0	1580
Q9UKV5	E3 ubiquitin-protein ligase AMFR	AMFR	E3 ubiquitin-protein ligase AMFR OS=Homo sapiens OX=9606 GN=AMFR PE=1 SV=2		0	0	0	0	0	0	1581
Q9UKY4	Protein O-mannosyl-transferase 2	POMT2	Protein O-mannosyl-transferase 2 OS=Homo sapiens OX=9606 GN=POMT2 PE=1 SV=2		0	0	0	0	0	0	1582
Q9UKY7	Protein CDV3 homolog	CDV3	Protein CDV3 homolog OS=Homo sapiens OX=9606 GN=CDV3 PE=1 SV=1		0	0	0	0	0	0	1583
Q9UKZ1	CCR4-NOT transcription complex subunit 11	CNOT11	CCR4-NOT transcription complex subunit 11 OS=Homo sapiens OX=9606 GN=CNOT11 PE=1 SV=1		0	0	0	0	0	0	1584
Q9UL03;Q5JSJ4	Integrator complex subunit 6	INTS6	Integrator complex subunit 6 OS=Homo sapiens OX=9606 GN=INTS6 PE=1 SV=1		0	0	0	0	0	0	1585
Q9UL46	Proteasome activator complex subunit 2	PSME2	Proteasome activator complex subunit 2 OS=Homo sapiens OX=9606 GN=PSME2 PE=1 SV=4		0	0	0	0	0	0	1586
Q9UL54	Serine/threonine-protein kinase TAO2	TAOK2	Serine/threonine-protein kinase TAO2 OS=Homo sapiens OX=9606 GN=TAOK2 PE=1 SV=2		0	0	0	0	0	0	1587
Q9ULG1	DNA helicase INO80	INO80	Chromatin-remodeling ATPase INO80 OS=Homo sapiens OX=9606 GN=INO80 PE=1 SV=2		0	0	0	0	0	0	1588
Q9ULH0	Kinase D-interacting substrate of 220 kDa	KIDINS220	Kinase D-interacting substrate of 220 kDa OS=Homo sapiens OX=9606 GN=KIDINS220 PE=1 SV=3		0	0	0	0	0	0	1589
Q9ULK4	Mediator of RNA polymerase II transcription subunit 23	MED23	Mediator of RNA polymerase II transcription subunit 23 OS=Homo sapiens OX=9606 GN=MED23 PE=1 SV=2		0	0	0	0	0	0	1590
Q9ULK6	RING finger protein 150	RNF150	RING finger protein 150 OS=Homo sapiens OX=9606 GN=RNF150 PE=2 SV=2		0	0	0	0	0	0	1591
Q9ULW3	Activator of basal transcription 1	ABT1	Activator of basal transcription 1 OS=Homo sapiens OX=9606 GN=ABT1 PE=1 SV=1		0	0	0	0	0	0	1592
Q9UM47	Neurogenic locus notch homolog protein 3;Notch 3 extracellular truncation;Notch 3 intracellular domain	NOTCH3	Neurogenic locus notch homolog protein 3 OS=Homo sapiens OX=9606 GN=NOTCH3 PE=1 SV=2		0	0	0	0	0	0	1593
Q9UN37	Vacuolar protein sorting-associated protein 4A	VPS4A	Vacuolar protein sorting-associated protein 4A OS=Homo sapiens OX=9606 GN=VPS4A PE=1 SV=1		0	0	0	0	0	0	1594
Q9UNI6	Dual specificity protein phosphatase 12	DUSP12	Dual specificity protein phosphatase 12 OS=Homo sapiens OX=9606 GN=DUSP12 PE=1 SV=1		0	0	0	0	0	0	1595
Q9UNM6	26S proteasome non-ATPase regulatory subunit 13	PSMD13	26S proteasome non-ATPase regulatory subunit 13 OS=Homo sapiens OX=9606 GN=PSMD13 PE=1 SV=2		0	0	0	0	0	0	1596
Q9UNS2	COP9 signalosome complex subunit 3	COPS3	COP9 signalosome complex subunit 3 OS=Homo sapiens OX=9606 GN=COPS3 PE=1 SV=3		0	0	0	0	0	0	1597
Q9UNX3	60S ribosomal protein L26-like 1	RPL26L1	60S ribosomal protein L26-like 1 OS=Homo sapiens OX=9606 GN=RPL26L1 PE=1 SV=1		0	0	0	0	0	0	1598
Q9UPM8	AP-4 complex subunit epsilon-1	AP4E1	AP-4 complex subunit epsilon-1 OS=Homo sapiens OX=9606 GN=AP4E1 PE=1 SV=2		0	0	0	0	0	0	1599
Q9UPN3	Microtubule-actin cross-linking factor 1, isoforms 1/2/3/5	MACF1	Microtubule-actin cross-linking factor 1, isoforms 1/2/3/5 OS=Homo sapiens OX=9606 GN=MACF1 PE=1 SV=4		0	0	0	0	0	0	1600
Q9UPN6	Protein SCAF8	SCAF8	SR-related and CTD-associated factor 8 OS=Homo sapiens OX=9606 GN=SCAF8 PE=1 SV=1		0	0	0	0	0	0	1601
Q9UPN9	E3 ubiquitin-protein ligase TRIM33	TRIM33	E3 ubiquitin-protein ligase TRIM33 OS=Homo sapiens OX=9606 GN=TRIM33 PE=1 SV=3		0	0	0	0	0	0	1602
Q9UPT8	Zinc finger CCCH domain-containing protein 4	ZC3H4	Zinc finger CCCH domain-containing protein 4 OS=Homo sapiens OX=9606 GN=ZC3H4 PE=1 SV=3		0	0	0	0	0	0	1603
Q9UQ90	Paraplegin	SPG7	Paraplegin OS=Homo sapiens OX=9606 GN=SPG7 PE=1 SV=2		0	0	0	0	0	0	1604
Q9Y217	Myotubularin-related protein 6	MTMR6	Myotubularin-related protein 6 OS=Homo sapiens OX=9606 GN=MTMR6 PE=1 SV=3		0	0	0	0	0	0	1605
Q9Y230	RuvB-like 2	RUVBL2	RuvB-like 2 OS=Homo sapiens OX=9606 GN=RUVBL2 PE=1 SV=3		0	0	0	0	0	0	1606
Q9Y232	Chromodomain Y-like protein	CDYL	Chromodomain Y-like protein OS=Homo sapiens OX=9606 GN=CDYL PE=1 SV=2		0	0	0	0	0	0	1607
Q9Y241	HIG1 domain family member 1A, mitochondrial	HIGD1A	HIG1 domain family member 1A, mitochondrial OS=Homo sapiens OX=9606 GN=HIGD1A PE=1 SV=1		0	0	0	0	0	0	1608
Q9Y263	Phospholipase A-2-activating protein	PLAA	Phospholipase A-2-activating protein OS=Homo sapiens OX=9606 GN=PLAA PE=1 SV=2		0	0	0	0	0	0	1609
Q9Y266	Nuclear migration protein nudC	NUDC	Nuclear migration protein nudC OS=Homo sapiens OX=9606 GN=NUDC PE=1 SV=1		0	0	0	0	0	0	1610
Q9Y296	Trafficking protein particle complex subunit 4	TRAPPC4	Trafficking protein particle complex subunit 4 OS=Homo sapiens OX=9606 GN=TRAPPC4 PE=1 SV=1		0	0	0	0	0	0	1611
Q9Y2G3	Probable phospholipid-transporting ATPase IF	ATP11B	Probable phospholipid-transporting ATPase IF OS=Homo sapiens OX=9606 GN=ATP11B PE=1 SV=2		0	0	0	0	0	0	1612
Q9Y2R0	Cytochrome c oxidase assembly factor 3 homolog, mitochondrial	COA3	Cytochrome c oxidase assembly factor 3 homolog, mitochondrial OS=Homo sapiens OX=9606 GN=COA3 PE=1 SV=1		0	0	0	0	0	0	1613
Q9Y2R5	28S ribosomal protein S17, mitochondrial	MRPS17	28S ribosomal protein S17, mitochondrial OS=Homo sapiens OX=9606 GN=MRPS17 PE=1 SV=1		0	0	0	0	0	0	1614
Q9Y2W6	Tudor and KH domain-containing protein	TDRKH	Tudor and KH domain-containing protein OS=Homo sapiens OX=9606 GN=TDRKH PE=1 SV=2		0	0	0	0	0	0	1615
Q9Y312	Protein AAR2 homolog	AAR2	Protein AAR2 homolog OS=Homo sapiens OX=9606 GN=AAR2 PE=1 SV=2		0	0	0	0	0	0	1616
Q9Y315	Deoxyribose-phosphate aldolase	DERA	Deoxyribose-phosphate aldolase OS=Homo sapiens OX=9606 GN=DERA PE=1 SV=2		0	0	0	0	0	0	1617
Q9Y333	U6 snRNA-associated Sm-like protein LSm2	LSM2	U6 snRNA-associated Sm-like protein LSm2 OS=Homo sapiens OX=9606 GN=LSM2 PE=1 SV=1		0	0	0	0	0	0	1618
Q9Y375	Complex I intermediate-associated protein 30, mitochondrial	NDUFAF1	Complex I intermediate-associated protein 30, mitochondrial OS=Homo sapiens OX=9606 GN=NDUFAF1 PE=1 SV=2		0	0	0	0	0	0	1619
Q9Y376	Calcium-binding protein 39	CAB39	Calcium-binding protein 39 OS=Homo sapiens OX=9606 GN=CAB39 PE=1 SV=1		0	0	0	0	0	0	1620
Q9Y3A6	Transmembrane emp24 domain-containing protein 5	TMED5	Transmembrane emp24 domain-containing protein 5 OS=Homo sapiens OX=9606 GN=TMED5 PE=1 SV=1		0	0	0	0	0	0	1621
Q9Y3B2	Exosome complex component CSL4	EXOSC1	Exosome complex component CSL4 OS=Homo sapiens OX=9606 GN=EXOSC1 PE=1 SV=1		0	0	0	0	0	0	1622
Q9Y3C6	Peptidyl-prolyl cis-trans isomerase-like 1	PPIL1	Peptidyl-prolyl cis-trans isomerase-like 1 OS=Homo sapiens OX=9606 GN=PPIL1 PE=1 SV=1		0	0	0	0	0	0	1623
Q9Y3C7	Mediator of RNA polymerase II transcription subunit 31	MED31	Mediator of RNA polymerase II transcription subunit 31 OS=Homo sapiens OX=9606 GN=MED31 PE=1 SV=1		0	0	0	0	0	0	1624
Q9Y3D3	28S ribosomal protein S16, mitochondrial	MRPS16	28S ribosomal protein S16, mitochondrial OS=Homo sapiens OX=9606 GN=MRPS16 PE=1 SV=1		0	0	0	0	0	0	1625
Q9Y3F4	Serine-threonine kinase receptor-associated protein	STRAP	Serine-threonine kinase receptor-associated protein OS=Homo sapiens OX=9606 GN=STRAP PE=1 SV=1		0	0	0	0	0	0	1626
Q9Y3Q3	Transmembrane emp24 domain-containing protein 3	TMED3	Transmembrane emp24 domain-containing protein 3 OS=Homo sapiens OX=9606 GN=TMED3 PE=1 SV=1		0	0	0	0	0	0	1627
Q9Y3Z3	Deoxynucleoside triphosphate triphosphohydrolase SAMHD1	SAMHD1	Deoxynucleoside triphosphate triphosphohydrolase SAMHD1 OS=Homo sapiens OX=9606 GN=SAMHD1 PE=1 SV=2		0	0	0	0	0	0	1628
Q9Y450	HBS1-like protein	HBS1L	HBS1-like protein OS=Homo sapiens OX=9606 GN=HBS1L PE=1 SV=1		0	0	0	0	0	0	1629
Q9Y478	5-AMP-activated protein kinase subunit beta-1	PRKAB1	5-AMP-activated protein kinase subunit beta-1 OS=Homo sapiens OX=9606 GN=PRKAB1 PE=1 SV=4		0	0	0	0	0	0	1630
Q9Y4A5	Transformation/transcription domain-associated protein	TRRAP	Transformation/transcription domain-associated protein OS=Homo sapiens OX=9606 GN=TRRAP PE=1 SV=3		0	0	0	0	0	0	1631
Q9Y4I1;Q9ULV0	Unconventional myosin-Va	MYO5A	Unconventional myosin-Va OS=Homo sapiens OX=9606 GN=MYO5A PE=1 SV=2		0	0	0	0	0	0	1632
Q9Y4W2	Ribosomal biogenesis protein LAS1L	LAS1L	Ribosomal biogenesis protein LAS1L OS=Homo sapiens OX=9606 GN=LAS1L PE=1 SV=2		0	0	0	0	0	0	1633
Q9Y4Y9	U6 snRNA-associated Sm-like protein LSm5	LSM5	U6 snRNA-associated Sm-like protein LSm5 OS=Homo sapiens OX=9606 GN=LSM5 PE=1 SV=3		0	0	0	0	0	0	1634
Q9Y519	Transmembrane protein 184B	TMEM184B	Transmembrane protein 184B OS=Homo sapiens OX=9606 GN=TMEM184B PE=1 SV=2		0	0	0	0	0	0	1635
Q9Y520	Protein PRRC2C	PRRC2C	Protein PRRC2C OS=Homo sapiens OX=9606 GN=PRRC2C PE=1 SV=4		0	0	0	0	0	0	1636
Q9Y5B6	PAX3- and PAX7-binding protein 1	PAXBP1	PAX3- and PAX7-binding protein 1 OS=Homo sapiens OX=9606 GN=PAXBP1 PE=1 SV=2		0	0	0	0	0	0	1637
Q9Y5K8	V-type proton ATPase subunit D	ATP6V1D	V-type proton ATPase subunit D OS=Homo sapiens OX=9606 GN=ATP6V1D PE=1 SV=1		0	0	0	0	0	0	1638
Q9Y5L4	Mitochondrial import inner membrane translocase subunit Tim13	TIMM13	Mitochondrial import inner membrane translocase subunit Tim13 OS=Homo sapiens OX=9606 GN=TIMM13 PE=1 SV=1		0	0	0	0	0	0	1639
Q9Y5Q0	Fatty acid desaturase 3	FADS3	Fatty acid desaturase 3 OS=Homo sapiens OX=9606 GN=FADS3 PE=1 SV=1		0	0	0	0	0	0	1640
Q9Y5Q8	General transcription factor 3C polypeptide 5	GTF3C5	General transcription factor 3C polypeptide 5 OS=Homo sapiens OX=9606 GN=GTF3C5 PE=1 SV=2		0	0	0	0	0	0	1641
Q9Y5Q9	General transcription factor 3C polypeptide 3	GTF3C3	General transcription factor 3C polypeptide 3 OS=Homo sapiens OX=9606 GN=GTF3C3 PE=1 SV=1		0	0	0	0	0	0	1642
Q9Y5R8	Trafficking protein particle complex subunit 1	TRAPPC1	Trafficking protein particle complex subunit 1 OS=Homo sapiens OX=9606 GN=TRAPPC1 PE=1 SV=1		0	0	0	0	0	0	1643
Q9Y5S2;Q5VT25	Serine/threonine-protein kinase MRCK beta	CDC42BPB	Serine/threonine-protein kinase MRCK beta OS=Homo sapiens OX=9606 GN=CDC42BPB PE=1 SV=2		0	0	0	0	0	0	1644
Q9Y5S9	RNA-binding protein 8A	RBM8A	RNA-binding protein 8A OS=Homo sapiens OX=9606 GN=RBM8A PE=1 SV=1		0	0	0	0	0	0	1645
Q9Y5U9	Immediate early response 3-interacting protein 1	IER3IP1	Immediate early response 3-interacting protein 1 OS=Homo sapiens OX=9606 GN=IER3IP1 PE=1 SV=1		0	0	0	0	0	0	1646
Q9Y5V0	Zinc finger protein 706	ZNF706	Zinc finger protein 706 OS=Homo sapiens OX=9606 GN=ZNF706 PE=1 SV=1		0	0	0	0	0	0	1647
Q9Y5X2	Sorting nexin-8	SNX8	Sorting nexin-8 OS=Homo sapiens OX=9606 GN=SNX8 PE=1 SV=1		0	0	0	0	0	0	1648
Q9Y5Z7	Host cell factor 2	HCFC2	Host cell factor 2 OS=Homo sapiens OX=9606 GN=HCFC2 PE=1 SV=1		0	0	0	0	0	0	1649
Q9Y613	FH1/FH2 domain-containing protein 1	FHOD1	FH1/FH2 domain-containing protein 1 OS=Homo sapiens OX=9606 GN=FHOD1 PE=1 SV=3		0	0	0	0	0	0	1650
Q9Y653	G-protein coupled receptor 56;GPR56 N-terminal fragment;GPR56 C-terminal fragment	GPR56	Adhesion G-protein coupled receptor G1 OS=Homo sapiens OX=9606 GN=ADGRG1 PE=1 SV=2		0	0	0	0	0	0	1651
Q9Y666	Solute carrier family 12 member 7	SLC12A7	Solute carrier family 12 member 7 OS=Homo sapiens OX=9606 GN=SLC12A7 PE=1 SV=3		0	0	0	0	0	0	1652
Q9Y672	Dolichyl pyrophosphate Man9GlcNAc2 alpha-1,3-glucosyltransferase	ALG6	Dolichyl pyrophosphate Man9GlcNAc2 alpha-1,3-glucosyltransferase OS=Homo sapiens OX=9606 GN=ALG6 PE=1 SV=2		0	0	0	0	0	0	1653
Q9Y676	28S ribosomal protein S18b, mitochondrial	MRPS18B	28S ribosomal protein S18b, mitochondrial OS=Homo sapiens OX=9606 GN=MRPS18B PE=1 SV=1		0	0	0	0	0	0	1654
Q9Y6A4	Cilia- and flagella-associated protein 20	CFAP20	Cilia- and flagella-associated protein 20 OS=Homo sapiens OX=9606 GN=CFAP20 PE=1 SV=1		0	0	0	0	0	0	1655
Q9Y6D0	Selenoprotein K	SELK	Selenoprotein K OS=Homo sapiens OX=9606 GN=SELENOK PE=1 SV=3		0	0	0	0	0	0	1656
Q9Y6D5	Brefeldin A-inhibited guanine nucleotide-exchange protein 2	ARFGEF2	Brefeldin A-inhibited guanine nucleotide-exchange protein 2 OS=Homo sapiens OX=9606 GN=ARFGEF2 PE=1 SV=3		0	0	0	0	0	0	1657
Q9Y6G9	Cytoplasmic dynein 1 light intermediate chain 1	DYNC1LI1	Cytoplasmic dynein 1 light intermediate chain 1 OS=Homo sapiens OX=9606 GN=DYNC1LI1 PE=1 SV=3		0	0	0	0	0	0	1658
Q9Y6I4	Ubiquitin carboxyl-terminal hydrolase 3	USP3	Ubiquitin carboxyl-terminal hydrolase 3 OS=Homo sapiens OX=9606 GN=USP3 PE=1 SV=2		0	0	0	0	0	0	1659
Q9Y6I9	Testis-expressed sequence 264 protein	TEX264	Testis-expressed protein 264 OS=Homo sapiens OX=9606 GN=TEX264 PE=1 SV=1		0	0	0	0	0	0	1660
Q9Y6J9	TAF6-like RNA polymerase II p300/CBP-associated factor-associated factor 65 kDa subunit 6L	TAF6L	TAF6-like RNA polymerase II p300/CBP-associated factor-associated factor 65 kDa subunit 6L OS=Homo sapiens OX=9606 GN=TAF6L PE=1 SV=1		0	0	0	0	0	0	1661
Q9Y6M7;Q2Y0W8;Q6U841	Sodium bicarbonate cotransporter 3	SLC4A7	Sodium bicarbonate cotransporter 3 OS=Homo sapiens OX=9606 GN=SLC4A7 PE=1 SV=2		0	0	0	0	0	0	1662
Q9Y6V7	Probable ATP-dependent RNA helicase DDX49	DDX49	Probable ATP-dependent RNA helicase DDX49 OS=Homo sapiens OX=9606 GN=DDX49 PE=1 SV=1		0	0	0	0	0	0	1663
Q9Y6X3	MAU2 chromatid cohesion factor homolog	MAU2	MAU2 chromatid cohesion factor homolog OS=Homo sapiens OX=9606 GN=MAU2 PE=1 SV=2		0	0	0	0	0	0	1664
REV__A0A1B0GUT2			Uncharacterized protein C10orf143 OS=Homo sapiens OX=9606 GN=C10orf143 PE=4 SV=1		0	0	0	0	0	0	1665
REV__A7E2Y1			Myosin-7B OS=Homo sapiens OX=9606 GN=MYH7B PE=1 SV=4		0	0	0	0	0	0	1666
REV__O14678			ATP-binding cassette sub-family D member 4 OS=Homo sapiens OX=9606 GN=ABCD4 PE=1 SV=1		0	0	0	0	0	0	1667
REV__O15083			ERC protein 2 OS=Homo sapiens OX=9606 GN=ERC2 PE=1 SV=3		0	0	0	0	0	0	1668
REV__O15455			Toll-like receptor 3 OS=Homo sapiens OX=9606 GN=TLR3 PE=1 SV=1		0	0	0	0	0	0	1669
REV__O60437			Periplakin OS=Homo sapiens OX=9606 GN=PPL PE=1 SV=4		0	0	0	0	0	0	1670
REV__O60656			UDP-glucuronosyltransferase 1-9 OS=Homo sapiens OX=9606 GN=UGT1A9 PE=1 SV=1		0	0	0	0	0	0	1671
REV__P08123			Collagen alpha-2(I) chain OS=Homo sapiens OX=9606 GN=COL1A2 PE=1 SV=7		0	0	0	0	0	0	1672
REV__P0C091			FRAS1-related extracellular matrix protein 3 OS=Homo sapiens OX=9606 GN=FREM3 PE=3 SV=2		0	0	0	0	0	0	1673
REV__P11172			Uridine 5-monophosphate synthase OS=Homo sapiens OX=9606 GN=UMPS PE=1 SV=1		0	0	0	0	0	0	1674
REV__P16885			1-phosphatidylinositol 4,5-bisphosphate phosphodiesterase gamma-2 OS=Homo sapiens OX=9606 GN=PLCG2 PE=1 SV=4		0	0	0	0	0	0	1675
REV__P20929			Nebulin OS=Homo sapiens OX=9606 GN=NEB PE=1 SV=5		0	0	0	0	0	0	1676
REV__P33121			Long-chain-fatty-acid--CoA ligase 1 OS=Homo sapiens OX=9606 GN=ACSL1 PE=1 SV=1		0	0	0	0	0	0	1677
REV__P55899			IgG receptor FcRn large subunit p51 OS=Homo sapiens OX=9606 GN=FCGRT PE=1 SV=1		0	0	0	0	0	0	1678
REV__Q05397			Focal adhesion kinase 1 OS=Homo sapiens OX=9606 GN=PTK2 PE=1 SV=2		0	0	0	0	0	0	1679
REV__Q15506			Sperm surface protein Sp17 OS=Homo sapiens OX=9606 GN=SPA17 PE=1 SV=1		0	0	0	0	0	0	1680
REV__Q4G0A6			Probable ubiquitin carboxyl-terminal hydrolase MINDY-4 OS=Homo sapiens OX=9606 GN=MINDY4 PE=1 SV=2		0	0	0	0	0	0	1681
REV__Q5BKX6			Solute carrier family 45 member 4 OS=Homo sapiens OX=9606 GN=SLC45A4 PE=1 SV=2		0	0	0	0	0	0	1682
REV__Q5FWF4			DNA annealing helicase and endonuclease ZRANB3 OS=Homo sapiens OX=9606 GN=ZRANB3 PE=1 SV=2		0	0	0	0	0	0	1683
REV__Q5JNZ3			Zinc finger protein 311 OS=Homo sapiens OX=9606 GN=ZNF311 PE=2 SV=2		0	0	0	0	0	0	1684
REV__Q5JTZ9			Alanine--tRNA ligase, mitochondrial OS=Homo sapiens OX=9606 GN=AARS2 PE=1 SV=1		0	0	0	0	0	0	1685
REV__Q69YQ0			Cytospin-A OS=Homo sapiens OX=9606 GN=SPECC1L PE=1 SV=2		0	0	0	0	0	0	1686
REV__Q86TL0			Cysteine protease ATG4D OS=Homo sapiens OX=9606 GN=ATG4D PE=1 SV=1		0	0	0	0	0	0	1687
REV__Q8IYB8			ATP-dependent RNA helicase SUPV3L1, mitochondrial OS=Homo sapiens OX=9606 GN=SUPV3L1 PE=1 SV=1		0	0	0	0	0	0	1688
REV__Q8TB92			3-hydroxy-3-methylglutaryl-CoA lyase, cytoplasmic OS=Homo sapiens OX=9606 GN=HMGCLL1 PE=1 SV=3		0	0	0	0	0	0	1689
REV__Q8WY36			HMG box transcription factor BBX OS=Homo sapiens OX=9606 GN=BBX PE=1 SV=1		0	0	0	0	0	0	1690
REV__Q92614			Unconventional myosin-XVIIIa OS=Homo sapiens OX=9606 GN=MYO18A PE=1 SV=3		0	0	0	0	0	0	1691
REV__Q969T3			Sorting nexin-21 OS=Homo sapiens OX=9606 GN=SNX21 PE=2 SV=1		0	0	0	0	0	0	1692
REV__Q9BYS8			Leucine-rich repeat-containing protein 2 OS=Homo sapiens OX=9606 GN=LRRC2 PE=2 SV=2		0	0	0	0	0	0	1693
REV__Q9H5Y7			SLIT and NTRK-like protein 6 OS=Homo sapiens OX=9606 GN=SLITRK6 PE=2 SV=3		0	0	0	0	0	0	1694
REV__Q9H7M6			Zinc finger SWIM domain-containing protein 4 OS=Homo sapiens OX=9606 GN=ZSWIM4 PE=2 SV=3		0	0	0	0	0	0	1695
REV__Q9UPN3			Microtubule-actin cross-linking factor 1, isoforms 1/2/3/5 OS=Homo sapiens OX=9606 GN=MACF1 PE=1 SV=4		0	0	0	0	0	0	1696
REV__Q9Y3R0			Glutamate receptor-interacting protein 1 OS=Homo sapiens OX=9606 GN=GRIP1 PE=1 SV=3		0	0	0	0	0	0	1697
Q9UIF8	Bromodomain adjacent to zinc finger domain protein 2B	BAZ2B	Bromodomain adjacent to zinc finger domain protein 2B OS=Homo sapiens OX=9606 GN=BAZ2B PE=1 SV=3		0	0	982360	0	0	491180	1698
P18850	Cyclic AMP-dependent transcription factor ATF-6 alpha;Processed cyclic AMP-dependent transcription factor ATF-6 alpha	ATF6	Cyclic AMP-dependent transcription factor ATF-6 alpha OS=Homo sapiens OX=9606 GN=ATF6 PE=1 SV=3		0	0	0	1033500	0	516750	1699
P61981	14-3-3 protein gamma;14-3-3 protein gamma, N-terminally processed	YWHAG	14-3-3 protein gamma OS=Homo sapiens OX=9606 GN=YWHAG PE=1 SV=2		0	0	1145200	0	0	572600	1700
P83369	U7 snRNA-associated Sm-like protein LSm11	LSM11	U7 snRNA-associated Sm-like protein LSm11 OS=Homo sapiens OX=9606 GN=LSM11 PE=1 SV=2		0	0	1217600	0	0	608800	1701
Q99595	Mitochondrial import inner membrane translocase subunit Tim17-A	TIMM17A	Mitochondrial import inner membrane translocase subunit Tim17-A OS=Homo sapiens OX=9606 GN=TIMM17A PE=1 SV=1		0	0	1403900	0	0	701950	1702
P48634	Protein PRRC2A	PRRC2A	Protein PRRC2A OS=Homo sapiens OX=9606 GN=PRRC2A PE=1 SV=3		0	0	1520700	0	0	760350	1703
Q9NSI2	Protein FAM207A	FAM207A	Protein FAM207A OS=Homo sapiens OX=9606 GN=FAM207A PE=1 SV=2		0	0	2568000	0	0	1284000	1704
Q16394	Exostosin-1	EXT1	Exostosin-1 OS=Homo sapiens OX=9606 GN=EXT1 PE=1 SV=2		0	0	0	2952900	0	1476450	1705
Q9C0I1	Myotubularin-related protein 12	MTMR12	Myotubularin-related protein 12 OS=Homo sapiens OX=9606 GN=MTMR12 PE=1 SV=2		0	0	3209200	0	0	1604600	1706
Q9Y619	Mitochondrial ornithine transporter 1	SLC25A15	Mitochondrial ornithine transporter 1 OS=Homo sapiens OX=9606 GN=SLC25A15 PE=1 SV=1		0	0	0	3246600	0	1623300	1707
Q96GQ5	RUS1 family protein C16orf58	C16orf58	RUS1 family protein C16orf58 OS=Homo sapiens OX=9606 GN=C16orf58 PE=1 SV=2		0	0	3428900	0	0	1714450	1708
Q8N531	F-box/LRR-repeat protein 6	FBXL6	F-box/LRR-repeat protein 6 OS=Homo sapiens OX=9606 GN=FBXL6 PE=2 SV=1		0	0	3631300	0	0	1815650	1709
Q9BR39	Junctophilin-2	JPH2	Junctophilin-2 OS=Homo sapiens OX=9606 GN=JPH2 PE=1 SV=2		0	0	0	3713600	0	1856800	1710
Q969P6	DNA topoisomerase I, mitochondrial	TOP1MT	DNA topoisomerase I, mitochondrial OS=Homo sapiens OX=9606 GN=TOP1MT PE=1 SV=1		0	0	3763800	0	0	1881900	1711
Q969S3	Zinc finger protein 622	ZNF622	Zinc finger protein 622 OS=Homo sapiens OX=9606 GN=ZNF622 PE=1 SV=1		18858000	11092000	4184700	0	14975000	2092350	1712
Q9P0V9	Septin-10	2022-09-10	Septin-10 OS=Homo sapiens OX=9606 GN=SEPTIN10 PE=1 SV=2		0	0	4275700	0	0	2137850	1713
Q9Y3B9	RRP15-like protein	RRP15	RRP15-like protein OS=Homo sapiens OX=9606 GN=RRP15 PE=1 SV=2		0	0	0	4282400	0	2141200	1714
Q12768	WASH complex subunit strumpellin	KIAA0196	WASH complex subunit 5 OS=Homo sapiens OX=9606 GN=WASHC5 PE=1 SV=1		0	0	0	4446000	0	2223000	1715
Q14CX7	N-alpha-acetyltransferase 25, NatB auxiliary subunit	NAA25	N-alpha-acetyltransferase 25, NatB auxiliary subunit OS=Homo sapiens OX=9606 GN=NAA25 PE=1 SV=1		0	0	4539400	0	0	2269700	1716
Q9Y2L1	Exosome complex exonuclease RRP44	DIS3	Exosome complex exonuclease RRP44 OS=Homo sapiens OX=9606 GN=DIS3 PE=1 SV=2		14786000	7784700	5107100	0	11285350	2553550	1717
P49914	5-formyltetrahydrofolate cyclo-ligase	MTHFS	5-formyltetrahydrofolate cyclo-ligase OS=Homo sapiens OX=9606 GN=MTHFS PE=1 SV=2		0	0	0	5129500	0	2564750	1718
P10909	Clusterin;Clusterin beta chain;Clusterin alpha chain	CLU	Clusterin OS=Homo sapiens OX=9606 GN=CLU PE=1 SV=1		0	0	0	5189900	0	2594950	1719
Q14669	E3 ubiquitin-protein ligase TRIP12	TRIP12	E3 ubiquitin-protein ligase TRIP12 OS=Homo sapiens OX=9606 GN=TRIP12 PE=1 SV=1		17040000	33288000	5395000	0	25164000	2697500	1720
Q8IZQ5	Selenoprotein H	SELH	Selenoprotein H OS=Homo sapiens OX=9606 GN=SELENOH PE=1 SV=2		0	0	0	5396400	0	2698200	1721
REV__Q96MW1			Coiled-coil domain-containing protein 43 OS=Homo sapiens OX=9606 GN=CCDC43 PE=1 SV=2		0	0	0	5639900	0	2819950	1722
Q9NV88	Integrator complex subunit 9	INTS9	Integrator complex subunit 9 OS=Homo sapiens OX=9606 GN=INTS9 PE=1 SV=2		0	0	0	5752200	0	2876100	1723
O00443	Phosphatidylinositol 4-phosphate 3-kinase C2 domain-containing subunit alpha	PIK3C2A	Phosphatidylinositol 4-phosphate 3-kinase C2 domain-containing subunit alpha OS=Homo sapiens OX=9606 GN=PIK3C2A PE=1 SV=2		0	4938200	0	5805800	2469100	2902900	1724
Q7Z589	Protein EMSY	EMSY	BRCA2-interacting transcriptional repressor EMSY OS=Homo sapiens OX=9606 GN=EMSY PE=1 SV=2		0	0	5966200	0	0	2983100	1725
P11217	Glycogen phosphorylase, muscle form	PYGM	Glycogen phosphorylase, muscle form OS=Homo sapiens OX=9606 GN=PYGM PE=1 SV=6		0	0	0	6132000	0	3066000	1726
REV__Q7Z460			CLIP-associating protein 1 OS=Homo sapiens OX=9606 GN=CLASP1 PE=1 SV=1		0	0	0	6151100	0	3075550	1727
Q567V2	Mpv17-like protein 2	MPV17L2	Mpv17-like protein 2 OS=Homo sapiens OX=9606 GN=MPV17L2 PE=1 SV=2		0	0	6175700	0	0	3087850	1728
Q9Y617	Phosphoserine aminotransferase	PSAT1	Phosphoserine aminotransferase OS=Homo sapiens OX=9606 GN=PSAT1 PE=1 SV=2		0	0	0	6269600	0	3134800	1729
Q13370	cGMP-inhibited 3,5-cyclic phosphodiesterase B	PDE3B	cGMP-inhibited 3,5-cyclic phosphodiesterase B OS=Homo sapiens OX=9606 GN=PDE3B PE=1 SV=2		0	0	0	6311400	0	3155700	1730
Q7Z5G4	Golgin subfamily A member 7	GOLGA7	Golgin subfamily A member 7 OS=Homo sapiens OX=9606 GN=GOLGA7 PE=1 SV=2		5792900	7001100	0	6694200	6397000	3347100	1731
Q96HJ9	UPF0562 protein C7orf55	C7orf55	Protein FMC1 homolog OS=Homo sapiens OX=9606 GN=FMC1 PE=1 SV=2		0	0	7211700	0	0	3605850	1732
Q15526	Surfeit locus protein 1	SURF1	Surfeit locus protein 1 OS=Homo sapiens OX=9606 GN=SURF1 PE=1 SV=1		11115000	0	7350700	0	5557500	3675350	1733
P47712	Cytosolic phospholipase A2;Phospholipase A2;Lysophospholipase	PLA2G4A	Cytosolic phospholipase A2 OS=Homo sapiens OX=9606 GN=PLA2G4A PE=1 SV=2		0	9678700	7451700	0	4839350	3725850	1734
O60826	Coiled-coil domain-containing protein 22	CCDC22	Coiled-coil domain-containing protein 22 OS=Homo sapiens OX=9606 GN=CCDC22 PE=1 SV=1		6531000	6634000	0	7583500	6582500	3791750	1735
O00214	Galectin-8	LGALS8	Galectin-8 OS=Homo sapiens OX=9606 GN=LGALS8 PE=1 SV=4		0	0	0	7956700	0	3978350	1736
Q9UHX1	Poly(U)-binding-splicing factor PUF60	PUF60	Poly(U)-binding-splicing factor PUF60 OS=Homo sapiens OX=9606 GN=PUF60 PE=1 SV=1		0	0	8120100	0	0	4060050	1737
Q9ULQ1	Two pore calcium channel protein 1	TPCN1	Two pore calcium channel protein 1 OS=Homo sapiens OX=9606 GN=TPCN1 PE=1 SV=3		0	0	0	8148100	0	4074050	1738
Q8WUD6	Cholinephosphotransferase 1	CHPT1	Cholinephosphotransferase 1 OS=Homo sapiens OX=9606 GN=CHPT1 PE=1 SV=1		0	0	0	8248900	0	4124450	1739
Q14142	Tripartite motif-containing protein 14	TRIM14	Tripartite motif-containing protein 14 OS=Homo sapiens OX=9606 GN=TRIM14 PE=1 SV=2		0	0	0	8302800	0	4151400	1740
Q93084	Sarcoplasmic/endoplasmic reticulum calcium ATPase 3	ATP2A3	Sarcoplasmic/endoplasmic reticulum calcium ATPase 3 OS=Homo sapiens OX=9606 GN=ATP2A3 PE=1 SV=2		0	0	8636700	0	0	4318350	1741
Q9Y6K5	2-5-oligoadenylate synthase 3	OAS3	2-5-oligoadenylate synthase 3 OS=Homo sapiens OX=9606 GN=OAS3 PE=1 SV=3		20791000	6665700	8882700	0	13728350	4441350	1742
Q96CW5	Gamma-tubulin complex component 3	TUBGCP3	Gamma-tubulin complex component 3 OS=Homo sapiens OX=9606 GN=TUBGCP3 PE=1 SV=2		0	0	9091600	0	0	4545800	1743
P49184	Deoxyribonuclease-1-like 1	DNASE1L1	Deoxyribonuclease-1-like 1 OS=Homo sapiens OX=9606 GN=DNASE1L1 PE=1 SV=1		0	0	9131100	0	0	4565550	1744
Q14596	Next to BRCA1 gene 1 protein	NBR1	Next to BRCA1 gene 1 protein OS=Homo sapiens OX=9606 GN=NBR1 PE=1 SV=3		0	0	0	9138800	0	4569400	1745
O95182	NADH dehydrogenase [ubiquinone] 1 alpha subcomplex subunit 7	NDUFA7	NADH dehydrogenase [ubiquinone] 1 alpha subcomplex subunit 7 OS=Homo sapiens OX=9606 GN=NDUFA7 PE=1 SV=3		0	0	0	9249600	0	4624800	1746
REV__P35579			Myosin-9 OS=Homo sapiens OX=9606 GN=MYH9 PE=1 SV=4		0	0	9570600	0	0	4785300	1747
O15270	Serine palmitoyltransferase 2	SPTLC2	Serine palmitoyltransferase 2 OS=Homo sapiens OX=9606 GN=SPTLC2 PE=1 SV=1		0	0	9859900	0	0	4929950	1748
Q9UQ88;P21127	Cyclin-dependent kinase 11A;Cyclin-dependent kinase 11B	CDK11A;CDK11B	Cyclin-dependent kinase 11A OS=Homo sapiens OX=9606 GN=CDK11A PE=1 SV=4;Cyclin-dependent kinase 11B OS=Homo sapiens OX=9606 GN=CDK11B PE=1 SV=4		0	0	0	9882800	0	4941400	1749
Q68CP4	Heparan-alpha-glucosaminide N-acetyltransferase	HGSNAT	Heparan-alpha-glucosaminide N-acetyltransferase OS=Homo sapiens OX=9606 GN=HGSNAT PE=1 SV=2		0	0	0	9985800	0	4992900	1750
Q5RKV6	Exosome complex component MTR3	EXOSC6	Exosome complex component MTR3 OS=Homo sapiens OX=9606 GN=EXOSC6 PE=1 SV=1		0	0	0	10034000	0	5017000	1751
Q9Y2C4	Nuclease EXOG, mitochondrial	EXOG	Nuclease EXOG, mitochondrial OS=Homo sapiens OX=9606 GN=EXOG PE=1 SV=2		15105000	13466000	0	10157000	14285500	5078500	1752
P43005	Excitatory amino acid transporter 3	SLC1A1	Excitatory amino acid transporter 3 OS=Homo sapiens OX=9606 GN=SLC1A1 PE=1 SV=2		0	0	0	10383000	0	5191500	1753
P61923	Coatomer subunit zeta-1	COPZ1	Coatomer subunit zeta-1 OS=Homo sapiens OX=9606 GN=COPZ1 PE=1 SV=1		0	10566000	10578000	0	5283000	5289000	1754
A6NGU5;P36268;P19440	Putative gamma-glutamyltranspeptidase 3;Putative gamma-glutamyltranspeptidase 3 heavy chain;Putative gamma-glutamyltranspeptidase 3 light chain;Inactive gamma-glutamyltranspeptidase 2;Gamma-glutamyltranspeptidase 1;Gamma-glutamyltranspeptidase 1 heavy chain;Gamma-glutamyltranspeptidase 1 light chain	GGT3P;GGT2;GGT1	Putative glutathione hydrolase 3 proenzyme OS=Homo sapiens OX=9606 GN=GGT3P PE=5 SV=2;Inactive glutathione hydrolase 2 OS=Homo sapiens OX=9606 GN=GGT2 PE=1 SV=3;Glutathione hydrolase 1 proenzyme OS=Homo sapiens OX=9606 GN=GGT1 PE=1 SV=2		0	0	0	10669000	0	5334500	1755
Q96CN7	Isochorismatase domain-containing protein 1	ISOC1	Isochorismatase domain-containing protein 1 OS=Homo sapiens OX=9606 GN=ISOC1 PE=1 SV=3		0	0	0	10697000	0	5348500	1756
O60749	Sorting nexin-2	SNX2	Sorting nexin-2 OS=Homo sapiens OX=9606 GN=SNX2 PE=1 SV=2		0	0	11054000	0	0	5527000	1757
Q9Y256	CAAX prenyl protease 2	RCE1	CAAX prenyl protease 2 OS=Homo sapiens OX=9606 GN=RCE1 PE=1 SV=1		0	5917200	5779400	5316900	2958600	5548150	1758
REV__P01130			Low-density lipoprotein receptor OS=Homo sapiens OX=9606 GN=LDLR PE=1 SV=1		0	0	0	11604000	0	5802000	1759
Q53S08;Q9H0N0		RAB6C	Ras-related protein Rab-6D OS=Homo sapiens OX=9606 GN=RAB6D PE=2 SV=1		12635000	11187000	11725000	0	11911000	5862500	1760
Q53HI1	Protein unc-50 homolog	UNC50	Protein unc-50 homolog OS=Homo sapiens OX=9606 GN=UNC50 PE=1 SV=2		0	0	11868000	0	0	5934000	1761
Q96KR1	Zinc finger RNA-binding protein	ZFR	Zinc finger RNA-binding protein OS=Homo sapiens OX=9606 GN=ZFR PE=1 SV=2		14377000	12802000	11968000	0	13589500	5984000	1762
Q8WVC6	Dephospho-CoA kinase domain-containing protein	DCAKD	Dephospho-CoA kinase domain-containing protein OS=Homo sapiens OX=9606 GN=DCAKD PE=1 SV=1		0	0	11992000	0	0	5996000	1763
Q15269	Periodic tryptophan protein 2 homolog	PWP2	Periodic tryptophan protein 2 homolog OS=Homo sapiens OX=9606 GN=PWP2 PE=2 SV=2		12052000	12773000	12165000	0	12412500	6082500	1764
Q9P2W9	Syntaxin-18	STX18	Syntaxin-18 OS=Homo sapiens OX=9606 GN=STX18 PE=1 SV=1		0	9194100	0	12380000	4597050	6190000	1765
Q9HCE3	Zinc finger protein 532	ZNF532	Zinc finger protein 532 OS=Homo sapiens OX=9606 GN=ZNF532 PE=1 SV=2		0	0	0	12410000	0	6205000	1766
Q14974	Importin subunit beta-1	KPNB1	Importin subunit beta-1 OS=Homo sapiens OX=9606 GN=KPNB1 PE=1 SV=2		14932000	6424900	12731000	0	10678450	6365500	1767
Q92820	Gamma-glutamyl hydrolase	GGH	Gamma-glutamyl hydrolase OS=Homo sapiens OX=9606 GN=GGH PE=1 SV=2		0	0	0	12733000	0	6366500	1768
O14656	Torsin-1A	TOR1A	Torsin-1A OS=Homo sapiens OX=9606 GN=TOR1A PE=1 SV=1		0	0	12844000	0	0	6422000	1769
REV__A6NNP5			Coiled-coil domain-containing protein 169 OS=Homo sapiens OX=9606 GN=CCDC169 PE=2 SV=4		0	0	12972000	0	0	6486000	1770
Q9NYU2	UDP-glucose:glycoprotein glucosyltransferase 1	UGGT1	UDP-glucose:glycoprotein glucosyltransferase 1 OS=Homo sapiens OX=9606 GN=UGGT1 PE=1 SV=3		10886000	13577000	13010000	0	12231500	6505000	1771
Q5BKY9;Q8N9E0	Protein FAM133B;Protein FAM133A	FAM133B;FAM133A	Protein FAM133B OS=Homo sapiens OX=9606 GN=FAM133B PE=1 SV=1;Protein FAM133A OS=Homo sapiens OX=9606 GN=FAM133A PE=1 SV=1		41048000	41186000	0	13038000	41117000	6519000	1772
Q5SRE5	Nucleoporin NUP188 homolog	NUP188	Nucleoporin NUP188 homolog OS=Homo sapiens OX=9606 GN=NUP188 PE=1 SV=1		18387000	20385000	0	13081000	19386000	6540500	1773
Q9H6F5	Coiled-coil domain-containing protein 86	CCDC86	Coiled-coil domain-containing protein 86 OS=Homo sapiens OX=9606 GN=CCDC86 PE=1 SV=1		0	0	0	13085000	0	6542500	1774
Q9BQE3	Tubulin alpha-1C chain	TUBA1C	Tubulin alpha-1C chain OS=Homo sapiens OX=9606 GN=TUBA1C PE=1 SV=1		20882000	19122000	13294000	0	20002000	6647000	1775
Q8NEB9	Phosphatidylinositol 3-kinase catalytic subunit type 3	PIK3C3	Phosphatidylinositol 3-kinase catalytic subunit type 3 OS=Homo sapiens OX=9606 GN=PIK3C3 PE=1 SV=1		0	0	13312000	0	0	6656000	1776
Q9NZD8	Maspardin	SPG21	Maspardin OS=Homo sapiens OX=9606 GN=SPG21 PE=1 SV=1		0	0	0	13329000	0	6664500	1777
Q9UDY4	DnaJ homolog subfamily B member 4	DNAJB4	DnaJ homolog subfamily B member 4 OS=Homo sapiens OX=9606 GN=DNAJB4 PE=1 SV=1		24826000	31983000	0	13383000	28404500	6691500	1778
P41440	Folate transporter 1	SLC19A1	Reduced folate transporter OS=Homo sapiens OX=9606 GN=SLC19A1 PE=1 SV=3		13628000	0	0	13461000	6814000	6730500	1779
P57721	Poly(rC)-binding protein 3	PCBP3	Poly(rC)-binding protein 3 OS=Homo sapiens OX=9606 GN=PCBP3 PE=2 SV=2		0	0	0	13462000	0	6731000	1780
Q9NXF1	Testis-expressed sequence 10 protein	TEX10	Testis-expressed protein 10 OS=Homo sapiens OX=9606 GN=TEX10 PE=1 SV=2		18373000	23044000	13566000	0	20708500	6783000	1781
Q14258	E3 ubiquitin/ISG15 ligase TRIM25	TRIM25	E3 ubiquitin/ISG15 ligase TRIM25 OS=Homo sapiens OX=9606 GN=TRIM25 PE=1 SV=2		127480000	119620000	0	13624000	123550000	6812000	1782
Q8NI27	THO complex subunit 2	THOC2	THO complex subunit 2 OS=Homo sapiens OX=9606 GN=THOC2 PE=1 SV=2		12098000	9657000	6502700	7161100	10877500	6831900	1783
P98173	Protein FAM3A	FAM3A	Protein FAM3A OS=Homo sapiens OX=9606 GN=FAM3A PE=1 SV=2		0	0	0	13685000	0	6842500	1784
Q8TBP6	Solute carrier family 25 member 40	SLC25A40	Solute carrier family 25 member 40 OS=Homo sapiens OX=9606 GN=SLC25A40 PE=1 SV=1		5334200	0	6429800	7274600	2667100	6852200	1785
Q96EY4	Translation machinery-associated protein 16	TMA16	Translation machinery-associated protein 16 OS=Homo sapiens OX=9606 GN=TMA16 PE=1 SV=2		12261000	8656700	13772000	0	10458850	6886000	1786
O15254	Peroxisomal acyl-coenzyme A oxidase 3	ACOX3	Peroxisomal acyl-coenzyme A oxidase 3 OS=Homo sapiens OX=9606 GN=ACOX3 PE=1 SV=2		11892000	12131000	13831000	0	12011500	6915500	1787
Q6UXD1	Histidine-rich carboxyl terminus protein 1	HRCT1	Histidine-rich carboxyl terminus protein 1 OS=Homo sapiens OX=9606 GN=HRCT1 PE=4 SV=1		0	0	0	13903000	0	6951500	1788
Q92900	Regulator of nonsense transcripts 1	UPF1	Regulator of nonsense transcripts 1 OS=Homo sapiens OX=9606 GN=UPF1 PE=1 SV=2		0	0	14070000	0	0	7035000	1789
Q8N1F7	Nuclear pore complex protein Nup93	NUP93	Nuclear pore complex protein Nup93 OS=Homo sapiens OX=9606 GN=NUP93 PE=1 SV=2		11675000	0	0	14090000	5837500	7045000	1790
Q86UL3	Glycerol-3-phosphate acyltransferase 4	AGPAT6	Glycerol-3-phosphate acyltransferase 4 OS=Homo sapiens OX=9606 GN=GPAT4 PE=1 SV=1		14184000	18056000	14132000	0	16120000	7066000	1791
O95169	NADH dehydrogenase [ubiquinone] 1 beta subcomplex subunit 8, mitochondrial	NDUFB8	NADH dehydrogenase [ubiquinone] 1 beta subcomplex subunit 8, mitochondrial OS=Homo sapiens OX=9606 GN=NDUFB8 PE=1 SV=1		15529000	14578000	14154000	0	15053500	7077000	1792
Q96CU9	FAD-dependent oxidoreductase domain-containing protein 1	FOXRED1	FAD-dependent oxidoreductase domain-containing protein 1 OS=Homo sapiens OX=9606 GN=FOXRED1 PE=1 SV=2		9548300	0	0	14175000	4774150	7087500	1793
Q9BXB4	Oxysterol-binding protein-related protein 11	OSBPL11	Oxysterol-binding protein-related protein 11 OS=Homo sapiens OX=9606 GN=OSBPL11 PE=1 SV=2		13655000	11849000	0	14194000	12752000	7097000	1794
Q9H479	Fructosamine-3-kinase	FN3K	Fructosamine-3-kinase OS=Homo sapiens OX=9606 GN=FN3K PE=1 SV=1		0	0	0	14275000	0	7137500	1795
Q15572	TATA box-binding protein-associated factor RNA polymerase I subunit C	TAF1C	TATA box-binding protein-associated factor RNA polymerase I subunit C OS=Homo sapiens OX=9606 GN=TAF1C PE=1 SV=2		0	0	0	14288000	0	7144000	1796
Q13206	Probable ATP-dependent RNA helicase DDX10	DDX10	Probable ATP-dependent RNA helicase DDX10 OS=Homo sapiens OX=9606 GN=DDX10 PE=1 SV=2		18537000	0	0	14382000	9268500	7191000	1797
Q9NV92	NEDD4 family-interacting protein 2	NDFIP2	NEDD4 family-interacting protein 2 OS=Homo sapiens OX=9606 GN=NDFIP2 PE=1 SV=2		0	0	0	14627000	0	7313500	1798
Q9Y4Z0	U6 snRNA-associated Sm-like protein LSm4	LSM4	U6 snRNA-associated Sm-like protein LSm4 OS=Homo sapiens OX=9606 GN=LSM4 PE=1 SV=1		0	0	0	14677000	0	7338500	1799
Q9Y678	Coatomer subunit gamma-1	COPG1	Coatomer subunit gamma-1 OS=Homo sapiens OX=9606 GN=COPG1 PE=1 SV=1		10752000	11507000	5179900	9497200	11129500	7338550	1800
Q6MZP7	Protein lin-54 homolog	LIN54	Protein lin-54 homolog OS=Homo sapiens OX=9606 GN=LIN54 PE=1 SV=3		0	0	14745000	0	0	7372500	1801
P82663	28S ribosomal protein S25, mitochondrial	MRPS25	28S ribosomal protein S25, mitochondrial OS=Homo sapiens OX=9606 GN=MRPS25 PE=1 SV=1		15731000	17870000	14822000	0	16800500	7411000	1802
O43808	Peroxisomal membrane protein PMP34	SLC25A17	Peroxisomal membrane protein PMP34 OS=Homo sapiens OX=9606 GN=SLC25A17 PE=1 SV=1		24820000	21525000	0	14945000	23172500	7472500	1803
Q5VSG8	Glycoprotein endo-alpha-1,2-mannosidase-like protein	MANEAL	Glycoprotein endo-alpha-1,2-mannosidase-like protein OS=Homo sapiens OX=9606 GN=MANEAL PE=2 SV=1		0	0	0	14968000	0	7484000	1804
Q9BRX8	Redox-regulatory protein FAM213A	FAM213A	Peroxiredoxin-like 2A OS=Homo sapiens OX=9606 GN=PRXL2A PE=1 SV=3		12558000	10569000	0	14974000	11563500	7487000	1805
Q8TCD1	UPF0729 protein C18orf32	C18orf32	UPF0729 protein C18orf32 OS=Homo sapiens OX=9606 GN=C18orf32 PE=3 SV=1		0	0	0	15156000	0	7578000	1806
P49841	Glycogen synthase kinase-3 beta	GSK3B	Glycogen synthase kinase-3 beta OS=Homo sapiens OX=9606 GN=GSK3B PE=1 SV=2		0	0	15225000	0	0	7612500	1807
P11137	Microtubule-associated protein 2	MAP2	Microtubule-associated protein 2 OS=Homo sapiens OX=9606 GN=MAP2 PE=1 SV=4		0	0	0	15366000	0	7683000	1808
O15228	Dihydroxyacetone phosphate acyltransferase	GNPAT	Dihydroxyacetone phosphate acyltransferase OS=Homo sapiens OX=9606 GN=GNPAT PE=1 SV=1		0	0	0	15387000	0	7693500	1809
Q9P0V3	SH3 domain-binding protein 4	SH3BP4	SH3 domain-binding protein 4 OS=Homo sapiens OX=9606 GN=SH3BP4 PE=1 SV=1		0	0	0	15395000	0	7697500	1810
P38432	Coilin	COIL	Coilin OS=Homo sapiens OX=9606 GN=COIL PE=1 SV=1		21739000	17722000	0	15456000	19730500	7728000	1811
O60493	Sorting nexin-3	SNX3	Sorting nexin-3 OS=Homo sapiens OX=9606 GN=SNX3 PE=1 SV=3		14716000	0	15500000	0	7358000	7750000	1812
Q6P3W7	SCY1-like protein 2	SCYL2	SCY1-like protein 2 OS=Homo sapiens OX=9606 GN=SCYL2 PE=1 SV=1		0	0	15723000	0	0	7861500	1813
O43772	Mitochondrial carnitine/acylcarnitine carrier protein	SLC25A20	Mitochondrial carnitine/acylcarnitine carrier protein OS=Homo sapiens OX=9606 GN=SLC25A20 PE=1 SV=1		0	0	15754000	0	0	7877000	1814
O75947	ATP synthase subunit d, mitochondrial	ATP5H	ATP synthase subunit d, mitochondrial OS=Homo sapiens OX=9606 GN=ATP5PD PE=1 SV=3		24194000	24776000	0	15912000	24485000	7956000	1815
P48735	Isocitrate dehydrogenase [NADP], mitochondrial	IDH2	Isocitrate dehydrogenase [NADP], mitochondrial OS=Homo sapiens OX=9606 GN=IDH2 PE=1 SV=2		14773000	16083000	16093000	0	15428000	8046500	1816
Q9Y2Z9	Ubiquinone biosynthesis monooxygenase COQ6, mitochondrial	COQ6	Ubiquinone biosynthesis monooxygenase COQ6, mitochondrial OS=Homo sapiens OX=9606 GN=COQ6 PE=1 SV=2		0	0	0	16224000	0	8112000	1817
Q96JJ7	Protein disulfide-isomerase TMX3	TMX3	Protein disulfide-isomerase TMX3 OS=Homo sapiens OX=9606 GN=TMX3 PE=1 SV=2		13499000	15916000	0	16391000	14707500	8195500	1818
Q9H4I3	TraB domain-containing protein	TRABD	TraB domain-containing protein OS=Homo sapiens OX=9606 GN=TRABD PE=1 SV=1		0	16991000	16452000	0	8495500	8226000	1819
Q96EK6	Glucosamine 6-phosphate N-acetyltransferase	GNPNAT1	Glucosamine 6-phosphate N-acetyltransferase OS=Homo sapiens OX=9606 GN=GNPNAT1 PE=1 SV=1		0	20186000	0	16497000	10093000	8248500	1820
O00186	Syntaxin-binding protein 3	STXBP3	Syntaxin-binding protein 3 OS=Homo sapiens OX=9606 GN=STXBP3 PE=1 SV=2		7779800	8633000	8564000	8011900	8206400	8287950	1821
P47755	F-actin-capping protein subunit alpha-2	CAPZA2	F-actin-capping protein subunit alpha-2 OS=Homo sapiens OX=9606 GN=CAPZA2 PE=1 SV=3		11867000	15423000	0	16587000	13645000	8293500	1822
Q9UI10	Translation initiation factor eIF-2B subunit delta	EIF2B4	Translation initiation factor eIF-2B subunit delta OS=Homo sapiens OX=9606 GN=EIF2B4 PE=1 SV=2		6278200	0	9786000	6807800	3139100	8296900	1823
O00148	ATP-dependent RNA helicase DDX39A	DDX39A	ATP-dependent RNA helicase DDX39A OS=Homo sapiens OX=9606 GN=DDX39A PE=1 SV=2		0	22438000	16612000	0	11219000	8306000	1824
Q8NFW8	N-acylneuraminate cytidylyltransferase	CMAS	N-acylneuraminate cytidylyltransferase OS=Homo sapiens OX=9606 GN=CMAS PE=1 SV=2		0	0	16743000	0	0	8371500	1825
Q9NV70	Exocyst complex component 1	EXOC1	Exocyst complex component 1 OS=Homo sapiens OX=9606 GN=EXOC1 PE=1 SV=4		0	28835000	0	16953000	14417500	8476500	1826
P45973	Chromobox protein homolog 5	CBX5	Chromobox protein homolog 5 OS=Homo sapiens OX=9606 GN=CBX5 PE=1 SV=1		0	0	17066000	0	0	8533000	1827
Q9UQE7	Structural maintenance of chromosomes protein 3	SMC3	Structural maintenance of chromosomes protein 3 OS=Homo sapiens OX=9606 GN=SMC3 PE=1 SV=2		41790000	36856000	0	17467000	39323000	8733500	1828
O43491;Q9Y2J2	Band 4.1-like protein 2	EPB41L2	Band 4.1-like protein 2 OS=Homo sapiens OX=9606 GN=EPB41L2 PE=1 SV=1		17224000	0	17546000	0	8612000	8773000	1829
Q9Y3E0	Vesicle transport protein GOT1B	GOLT1B	Vesicle transport protein GOT1B OS=Homo sapiens OX=9606 GN=GOLT1B PE=1 SV=1		15251000	15178000	17645000	0	15214500	8822500	1830
Q96KM6	Zinc finger protein 512B	ZNF512B	Zinc finger protein 512B OS=Homo sapiens OX=9606 GN=ZNF512B PE=1 SV=1		0	0	0	17943000	0	8971500	1831
Q9NXC5	WD repeat-containing protein mio	MIOS	GATOR complex protein MIOS OS=Homo sapiens OX=9606 GN=MIOS PE=1 SV=2		0	0	0	17943000	0	8971500	1832
P08243	Asparagine synthetase [glutamine-hydrolyzing]	ASNS	Asparagine synthetase [glutamine-hydrolyzing] OS=Homo sapiens OX=9606 GN=ASNS PE=1 SV=4		7734400	0	8142700	9880600	3867200	9011650	1833
Q13557	Calcium/calmodulin-dependent protein kinase type II subunit delta	CAMK2D	Calcium/calmodulin-dependent protein kinase type II subunit delta OS=Homo sapiens OX=9606 GN=CAMK2D PE=1 SV=3		23460000	0	18061000	0	11730000	9030500	1834
Q13425	Beta-2-syntrophin	SNTB2	Beta-2-syntrophin OS=Homo sapiens OX=9606 GN=SNTB2 PE=1 SV=1		7603800	8489900	10043000	8069200	8046850	9056100	1835
Q68CQ7	Glycosyltransferase 8 domain-containing protein 1	GLT8D1	Glycosyltransferase 8 domain-containing protein 1 OS=Homo sapiens OX=9606 GN=GLT8D1 PE=1 SV=2		18616000	16618000	18121000	0	17617000	9060500	1836
P04818	Thymidylate synthase	TYMS	Thymidylate synthase OS=Homo sapiens OX=9606 GN=TYMS PE=1 SV=3		0	0	0	18163000	0	9081500	1837
P32856	Syntaxin-2	STX2	Syntaxin-2 OS=Homo sapiens OX=9606 GN=STX2 PE=1 SV=3		18952000	0	18303000	0	9476000	9151500	1838
P49736	DNA replication licensing factor MCM2	MCM2	DNA replication licensing factor MCM2 OS=Homo sapiens OX=9606 GN=MCM2 PE=1 SV=4		12678000	11303000	10931000	7494700	11990500	9212850	1839
Q96HV5	Transmembrane protein 41A	TMEM41A	Transmembrane protein 41A OS=Homo sapiens OX=9606 GN=TMEM41A PE=1 SV=1		19230000	21620000	18478000	0	20425000	9239000	1840
Q92542	Nicastrin	NCSTN	Nicastrin OS=Homo sapiens OX=9606 GN=NCSTN PE=1 SV=2		18868000	0	18510000	0	9434000	9255000	1841
Q9P000	COMM domain-containing protein 9	COMMD9	COMM domain-containing protein 9 OS=Homo sapiens OX=9606 GN=COMMD9 PE=1 SV=2		0	0	0	18522000	0	9261000	1842
Q9NRW7	Vacuolar protein sorting-associated protein 45	VPS45	Vacuolar protein sorting-associated protein 45 OS=Homo sapiens OX=9606 GN=VPS45 PE=1 SV=1		0	0	9712600	9037100	0	9374850	1843
Q96PU4	E3 ubiquitin-protein ligase UHRF2	UHRF2	E3 ubiquitin-protein ligase UHRF2 OS=Homo sapiens OX=9606 GN=UHRF2 PE=1 SV=1		14639000	20308000	0	18832000	17473500	9416000	1844
Q13868	Exosome complex component RRP4	EXOSC2	Exosome complex component RRP4 OS=Homo sapiens OX=9606 GN=EXOSC2 PE=1 SV=2		42124000	39805000	0	18854000	40964500	9427000	1845
O14776	Transcription elongation regulator 1	TCERG1	Transcription elongation regulator 1 OS=Homo sapiens OX=9606 GN=TCERG1 PE=1 SV=2		0	0	18869000	0	0	9434500	1846
Q96T37	Putative RNA-binding protein 15	RBM15	RNA-binding protein 15 OS=Homo sapiens OX=9606 GN=RBM15 PE=1 SV=2		0	34515000	0	18875000	17257500	9437500	1847
Q9NQT5	Exosome complex component RRP40	EXOSC3	Exosome complex component RRP40 OS=Homo sapiens OX=9606 GN=EXOSC3 PE=1 SV=3		0	24424000	18900000	0	12212000	9450000	1848
Q15555	Microtubule-associated protein RP/EB family member 2	MAPRE2	Microtubule-associated protein RP/EB family member 2 OS=Homo sapiens OX=9606 GN=MAPRE2 PE=1 SV=1		0	0	19050000	0	0	9525000	1849
Q9Y4F1	FERM, RhoGEF and pleckstrin domain-containing protein 1	FARP1	FERM, ARHGEF and pleckstrin domain-containing protein 1 OS=Homo sapiens OX=9606 GN=FARP1 PE=1 SV=1		12749000	20311000	0	19489000	16530000	9744500	1850
Q9NVH1	DnaJ homolog subfamily C member 11	DNAJC11	DnaJ homolog subfamily C member 11 OS=Homo sapiens OX=9606 GN=DNAJC11 PE=1 SV=2		39159000	30752000	19636000	0	34955500	9818000	1851
Q9BQ48	39S ribosomal protein L34, mitochondrial	MRPL34	39S ribosomal protein L34, mitochondrial OS=Homo sapiens OX=9606 GN=MRPL34 PE=1 SV=1		0	0	19637000	0	0	9818500	1852
Q9H223	EH domain-containing protein 4	EHD4	EH domain-containing protein 4 OS=Homo sapiens OX=9606 GN=EHD4 PE=1 SV=1		21644000	22744000	0	19682000	22194000	9841000	1853
Q86UY6	N-alpha-acetyltransferase 40	NAA40	N-alpha-acetyltransferase 40 OS=Homo sapiens OX=9606 GN=NAA40 PE=1 SV=1		0	10090000	11587000	8140500	5045000	9863750	1854
Q7Z3K3	Pogo transposable element with ZNF domain	POGZ	Pogo transposable element with ZNF domain OS=Homo sapiens OX=9606 GN=POGZ PE=1 SV=2		0	0	0	19845000	0	9922500	1855
Q9H845	Acyl-CoA dehydrogenase family member 9, mitochondrial	ACAD9	Complex I assembly factor ACAD9, mitochondrial OS=Homo sapiens OX=9606 GN=ACAD9 PE=1 SV=1		0	0	20046000	0	0	10023000	1856
Q13356	Peptidyl-prolyl cis-trans isomerase-like 2	PPIL2	RING-type E3 ubiquitin-protein ligase PPIL2 OS=Homo sapiens OX=9606 GN=PPIL2 PE=1 SV=1		17462000	0	20118000	0	8731000	10059000	1857
O14975	Very long-chain acyl-CoA synthetase	SLC27A2	Very long-chain acyl-CoA synthetase OS=Homo sapiens OX=9606 GN=SLC27A2 PE=1 SV=2		18243000	15071000	20148000	0	16657000	10074000	1858
P20338;P61018	Ras-related protein Rab-4A	RAB4A	Ras-related protein Rab-4A OS=Homo sapiens OX=9606 GN=RAB4A PE=1 SV=3		20923000	0	20217000	0	10461500	10108500	1859
Q9BZZ5	Apoptosis inhibitor 5	API5	Apoptosis inhibitor 5 OS=Homo sapiens OX=9606 GN=API5 PE=1 SV=3		0	0	0	20259000	0	10129500	1860
P15924	Desmoplakin	DSP	Desmoplakin OS=Homo sapiens OX=9606 GN=DSP PE=1 SV=3		19320000	19499000	20311000	0	19409500	10155500	1861
Q9H9J2	39S ribosomal protein L44, mitochondrial	MRPL44	39S ribosomal protein L44, mitochondrial OS=Homo sapiens OX=9606 GN=MRPL44 PE=1 SV=1		37180000	35535000	0	20316000	36357500	10158000	1862
Q12830	Nucleosome-remodeling factor subunit BPTF	BPTF	Nucleosome-remodeling factor subunit BPTF OS=Homo sapiens OX=9606 GN=BPTF PE=1 SV=3		31979000	22752000	20434000	0	27365500	10217000	1863
O95487	Protein transport protein Sec24B	SEC24B	Protein transport protein Sec24B OS=Homo sapiens OX=9606 GN=SEC24B PE=1 SV=2		0	7593800	10061000	10492000	3796900	10276500	1864
Q8WUY1	Protein THEM6	THEM6	Protein THEM6 OS=Homo sapiens OX=9606 GN=THEM6 PE=1 SV=2		19474000	20965000	20675000	0	20219500	10337500	1865
Q9UJX2	Cell division cycle protein 23 homolog	CDC23	Cell division cycle protein 23 homolog OS=Homo sapiens OX=9606 GN=CDC23 PE=1 SV=3		0	14527000	20810000	0	7263500	10405000	1866
O14965;Q9UQB9	Aurora kinase A	AURKA	Aurora kinase A OS=Homo sapiens OX=9606 GN=AURKA PE=1 SV=2		0	15472000	20908000	0	7736000	10454000	1867
Q9H857	5-nucleotidase domain-containing protein 2	NT5DC2	5-nucleotidase domain-containing protein 2 OS=Homo sapiens OX=9606 GN=NT5DC2 PE=1 SV=1		0	0	10376000	10577000	0	10476500	1868
Q14435	Polypeptide N-acetylgalactosaminyltransferase 3	GALNT3	Polypeptide N-acetylgalactosaminyltransferase 3 OS=Homo sapiens OX=9606 GN=GALNT3 PE=1 SV=2		34231000	10229000	0	21098000	22230000	10549000	1869
P50613;Q9C098	Cyclin-dependent kinase 7	CDK7	Cyclin-dependent kinase 7 OS=Homo sapiens OX=9606 GN=CDK7 PE=1 SV=1		0	0	21226000	0	0	10613000	1870
P29992;P50148;O95837	Guanine nucleotide-binding protein subunit alpha-11	GNA11	Guanine nucleotide-binding protein subunit alpha-11 OS=Homo sapiens OX=9606 GN=GNA11 PE=1 SV=2		24178000	0	0	21287000	12089000	10643500	1871
P38606	V-type proton ATPase catalytic subunit A	ATP6V1A	V-type proton ATPase catalytic subunit A OS=Homo sapiens OX=9606 GN=ATP6V1A PE=1 SV=2		0	0	0	21339000	0	10669500	1872
P50238	Cysteine-rich protein 1	CRIP1	Cysteine-rich protein 1 OS=Homo sapiens OX=9606 GN=CRIP1 PE=1 SV=3		0	47115000	21368000	0	23557500	10684000	1873
Q12884	Prolyl endopeptidase FAP;Antiplasmin-cleaving enzyme FAP, soluble form	FAP	Prolyl endopeptidase FAP OS=Homo sapiens OX=9606 GN=FAP PE=1 SV=5		19365000	0	0	21386000	9682500	10693000	1874
Q9ULF5	Zinc transporter ZIP10	SLC39A10	Zinc transporter ZIP10 OS=Homo sapiens OX=9606 GN=SLC39A10 PE=1 SV=2		21867000	0	21470000	0	10933500	10735000	1875
O43670	BUB3-interacting and GLEBS motif-containing protein ZNF207	ZNF207	BUB3-interacting and GLEBS motif-containing protein ZNF207 OS=Homo sapiens OX=9606 GN=ZNF207 PE=1 SV=1		0	0	21569000	0	0	10784500	1876
Q9BUJ2	Heterogeneous nuclear ribonucleoprotein U-like protein 1	HNRNPUL1	Heterogeneous nuclear ribonucleoprotein U-like protein 1 OS=Homo sapiens OX=9606 GN=HNRNPUL1 PE=1 SV=2		39891000	29765000	0	21825000	34828000	10912500	1877
O94923	D-glucuronyl C5-epimerase	GLCE	D-glucuronyl C5-epimerase OS=Homo sapiens OX=9606 GN=GLCE PE=1 SV=3		16907000	25799000	21858000	0	21353000	10929000	1878
Q8N2F6	Armadillo repeat-containing protein 10	ARMC10	Armadillo repeat-containing protein 10 OS=Homo sapiens OX=9606 GN=ARMC10 PE=1 SV=1		13622000	14600000	10649000	11213000	14111000	10931000	1879
A3KMH1	von Willebrand factor A domain-containing protein 8	VWA8	von Willebrand factor A domain-containing protein 8 OS=Homo sapiens OX=9606 GN=VWA8 PE=1 SV=2		14072000	19298000	22033000	0	16685000	11016500	1880
Q7KZN9	Cytochrome c oxidase assembly protein COX15 homolog	COX15	Cytochrome c oxidase assembly protein COX15 homolog OS=Homo sapiens OX=9606 GN=COX15 PE=1 SV=1		22118000	18007000	0	22055000	20062500	11027500	1881
A6NHR9	Structural maintenance of chromosomes flexible hinge domain-containing protein 1	SMCHD1	Structural maintenance of chromosomes flexible hinge domain-containing protein 1 OS=Homo sapiens OX=9606 GN=SMCHD1 PE=1 SV=2		11423000	10986000	11124000	11046000	11204500	11085000	1882
O75128	Protein cordon-bleu	COBL	Protein cordon-bleu OS=Homo sapiens OX=9606 GN=COBL PE=1 SV=2		10625000	10732000	12269000	9920500	10678500	11094750	1883
P42765	3-ketoacyl-CoA thiolase, mitochondrial	ACAA2	3-ketoacyl-CoA thiolase, mitochondrial OS=Homo sapiens OX=9606 GN=ACAA2 PE=1 SV=2		32085000	34154000	22348000	0	33119500	11174000	1884
O43633	Charged multivesicular body protein 2a	CHMP2A	Charged multivesicular body protein 2a OS=Homo sapiens OX=9606 GN=CHMP2A PE=1 SV=1		0	0	22469000	0	0	11234500	1885
Q96EX1	Small integral membrane protein 12	SMIM12	Small integral membrane protein 12 OS=Homo sapiens OX=9606 GN=SMIM12 PE=1 SV=3		27802000	0	22526000	0	13901000	11263000	1886
Q96KC8	DnaJ homolog subfamily C member 1	DNAJC1	DnaJ homolog subfamily C member 1 OS=Homo sapiens OX=9606 GN=DNAJC1 PE=1 SV=1		11446000	14520000	11552000	10991000	12983000	11271500	1887
O00469	Procollagen-lysine,2-oxoglutarate 5-dioxygenase 2	PLOD2	Procollagen-lysine,2-oxoglutarate 5-dioxygenase 2 OS=Homo sapiens OX=9606 GN=PLOD2 PE=1 SV=2		0	22560000	0	22600000	11280000	11300000	1888
Q00765	Receptor expression-enhancing protein 5	REEP5	Receptor expression-enhancing protein 5 OS=Homo sapiens OX=9606 GN=REEP5 PE=1 SV=3		0	0	0	22683000	0	11341500	1889
Q92968	Peroxisomal membrane protein PEX13	PEX13	Peroxisomal membrane protein PEX13 OS=Homo sapiens OX=9606 GN=PEX13 PE=1 SV=2		0	0	22689000	0	0	11344500	1890
O96013	Serine/threonine-protein kinase PAK 4	PAK4	Serine/threonine-protein kinase PAK 4 OS=Homo sapiens OX=9606 GN=PAK4 PE=1 SV=1		24952000	24625000	22988000	0	24788500	11494000	1891
O95486	Protein transport protein Sec24A	SEC24A	Protein transport protein Sec24A OS=Homo sapiens OX=9606 GN=SEC24A PE=1 SV=2		8465300	12172000	11979000	11375000	10318650	11677000	1892
Q5QJE6	Deoxynucleotidyltransferase terminal-interacting protein 2	DNTTIP2	Deoxynucleotidyltransferase terminal-interacting protein 2 OS=Homo sapiens OX=9606 GN=DNTTIP2 PE=1 SV=2		0	0	0	23549000	0	11774500	1893
Q9BXP2	Solute carrier family 12 member 9	SLC12A9	Solute carrier family 12 member 9 OS=Homo sapiens OX=9606 GN=SLC12A9 PE=1 SV=1		14645000	15483000	12624000	10964000	15064000	11794000	1894
Q15646	2-5-oligoadenylate synthase-like protein	OASL	2-5-oligoadenylate synthase-like protein OS=Homo sapiens OX=9606 GN=OASL PE=1 SV=2		51589000	32468000	15663000	8128300	42028500	11895650	1895
Q9Y224	UPF0568 protein C14orf166	C14orf166	RNA transcription, translation and transport factor protein OS=Homo sapiens OX=9606 GN=RTRAF PE=1 SV=1		20543000	21789000	0	23875000	21166000	11937500	1896
O75954	Tetraspanin-9	TSPAN9	Tetraspanin-9 OS=Homo sapiens OX=9606 GN=TSPAN9 PE=1 SV=1		20240000	24901000	23964000	0	22570500	11982000	1897
Q9ULC4	Malignant T-cell-amplified sequence 1	MCTS1	Malignant T-cell-amplified sequence 1 OS=Homo sapiens OX=9606 GN=MCTS1 PE=1 SV=1		40290000	41010000	0	24104000	40650000	12052000	1898
O94766	Galactosylgalactosylxylosylprotein 3-beta-glucuronosyltransferase 3	B3GAT3	Galactosylgalactosylxylosylprotein 3-beta-glucuronosyltransferase 3 OS=Homo sapiens OX=9606 GN=B3GAT3 PE=1 SV=2		0	25961000	0	24146000	12980500	12073000	1899
Q14432	cGMP-inhibited 3,5-cyclic phosphodiesterase A	PDE3A	cGMP-inhibited 3,5-cyclic phosphodiesterase A OS=Homo sapiens OX=9606 GN=PDE3A PE=1 SV=3		0	0	0	24267000	0	12133500	1900
Q17RY6	Lymphocyte antigen 6K	LY6K	Lymphocyte antigen 6K OS=Homo sapiens OX=9606 GN=LY6K PE=1 SV=2		0	26367000	0	24448000	13183500	12224000	1901
Q8NBI5	Solute carrier family 43 member 3	SLC43A3	Solute carrier family 43 member 3 OS=Homo sapiens OX=9606 GN=SLC43A3 PE=1 SV=2		32634000	0	24449000	0	16317000	12224500	1902
O75787	Renin receptor	ATP6AP2	Renin receptor OS=Homo sapiens OX=9606 GN=ATP6AP2 PE=1 SV=2		21590000	20351000	24480000	0	20970500	12240000	1903
P53992	Protein transport protein Sec24C	SEC24C	Protein transport protein Sec24C OS=Homo sapiens OX=9606 GN=SEC24C PE=1 SV=3		0	13335000	24490000	0	6667500	12245000	1904
P84090	Enhancer of rudimentary homolog	ERH	Enhancer of rudimentary homolog OS=Homo sapiens OX=9606 GN=ERH PE=1 SV=1		42795000	52367000	24533000	0	47581000	12266500	1905
Q5W0Z9	Probable palmitoyltransferase ZDHHC20	ZDHHC20	Palmitoyltransferase ZDHHC20 OS=Homo sapiens OX=9606 GN=ZDHHC20 PE=1 SV=1		0	0	0	24662000	0	12331000	1906
Q8IWT6;Q8TDW0	Volume-regulated anion channel subunit LRRC8A	LRRC8A	Volume-regulated anion channel subunit LRRC8A OS=Homo sapiens OX=9606 GN=LRRC8A PE=1 SV=1		0	0	24764000	0	0	12382000	1907
Q9BT17	Mitochondrial ribosome-associated GTPase 1	MTG1	Mitochondrial ribosome-associated GTPase 1 OS=Homo sapiens OX=9606 GN=MTG1 PE=1 SV=2		23461000	25648000	24775000	0	24554500	12387500	1908
P0DMV9;P0DMV8	Heat shock 70 kDa protein 1B;Heat shock 70 kDa protein 1A	HSPA1B;HSPA1A	Heat shock 70 kDa protein 1B OS=Homo sapiens OX=9606 GN=HSPA1B PE=1 SV=1;Heat shock 70 kDa protein 1A OS=Homo sapiens OX=9606 GN=HSPA1A PE=1 SV=1		33346000	26227000	0	24779000	29786500	12389500	1909
Q709F0	Acyl-CoA dehydrogenase family member 11	ACAD11	Acyl-CoA dehydrogenase family member 11 OS=Homo sapiens OX=9606 GN=ACAD11 PE=1 SV=3		0	0	0	24848000	0	12424000	1910
Q8WWQ0	PH-interacting protein	PHIP	PH-interacting protein OS=Homo sapiens OX=9606 GN=PHIP PE=1 SV=2		21768000	27518000	24953000	0	24643000	12476500	1911
Q99832	T-complex protein 1 subunit eta	CCT7	T-complex protein 1 subunit eta OS=Homo sapiens OX=9606 GN=CCT7 PE=1 SV=2		31606000	36671000	24959000	0	34138500	12479500	1912
P35250	Replication factor C subunit 2	RFC2	Replication factor C subunit 2 OS=Homo sapiens OX=9606 GN=RFC2 PE=1 SV=3		9504000	17764000	10581000	14382000	13634000	12481500	1913
O43920	NADH dehydrogenase [ubiquinone] iron-sulfur protein 5	NDUFS5	NADH dehydrogenase [ubiquinone] iron-sulfur protein 5 OS=Homo sapiens OX=9606 GN=NDUFS5 PE=1 SV=3		44113000	39041000	24984000	0	41577000	12492000	1914
Q9Y3T9	Nucleolar complex protein 2 homolog	NOC2L	Nucleolar complex protein 2 homolog OS=Homo sapiens OX=9606 GN=NOC2L PE=1 SV=4		0	27697000	25141000	0	13848500	12570500	1915
Q9Y262	Eukaryotic translation initiation factor 3 subunit L	EIF3L	Eukaryotic translation initiation factor 3 subunit L OS=Homo sapiens OX=9606 GN=EIF3L PE=1 SV=1		30815000	34918000	25328000	0	32866500	12664000	1916
Q70UQ0	Inhibitor of nuclear factor kappa-B kinase-interacting protein	IKBIP	Inhibitor of nuclear factor kappa-B kinase-interacting protein OS=Homo sapiens OX=9606 GN=IKBIP PE=1 SV=1		55149000	50474000	0	25561000	52811500	12780500	1917
Q00059	Transcription factor A, mitochondrial	TFAM	Transcription factor A, mitochondrial OS=Homo sapiens OX=9606 GN=TFAM PE=1 SV=1		26923000	25564000	25593000	0	26243500	12796500	1918
Q6IAN0	Dehydrogenase/reductase SDR family member 7B	DHRS7B	Dehydrogenase/reductase SDR family member 7B OS=Homo sapiens OX=9606 GN=DHRS7B PE=1 SV=2		27995000	23144000	25628000	0	25569500	12814000	1919
O60716	Catenin delta-1	CTNND1	Catenin delta-1 OS=Homo sapiens OX=9606 GN=CTNND1 PE=1 SV=1		0	25233000	0	25638000	12616500	12819000	1920
P48556	26S proteasome non-ATPase regulatory subunit 8	PSMD8	26S proteasome non-ATPase regulatory subunit 8 OS=Homo sapiens OX=9606 GN=PSMD8 PE=1 SV=2		30171000	14796000	25896000	0	22483500	12948000	1921
P17302	Gap junction alpha-1 protein	GJA1	Gap junction alpha-1 protein OS=Homo sapiens OX=9606 GN=GJA1 PE=1 SV=2		0	24113000	25962000	0	12056500	12981000	1922
P11172	Uridine 5-monophosphate synthase;Orotate phosphoribosyltransferase;Orotidine 5-phosphate decarboxylase	UMPS	Uridine 5-monophosphate synthase OS=Homo sapiens OX=9606 GN=UMPS PE=1 SV=1		0	0	26204000	0	0	13102000	1923
Q86YN1	Dolichyldiphosphatase 1	DOLPP1	Dolichyldiphosphatase 1 OS=Homo sapiens OX=9606 GN=DOLPP1 PE=2 SV=1		0	0	26268000	0	0	13134000	1924
O00622	Protein CYR61	CYR61	CCN family member 1 OS=Homo sapiens OX=9606 GN=CCN1 PE=1 SV=1		32394000	29394000	26357000	0	30894000	13178500	1925
O14735	CDP-diacylglycerol--inositol 3-phosphatidyltransferase	CDIPT	CDP-diacylglycerol--inositol 3-phosphatidyltransferase OS=Homo sapiens OX=9606 GN=CDIPT PE=1 SV=1		24583000	32710000	26453000	0	28646500	13226500	1926
P52895	Aldo-keto reductase family 1 member C2	AKR1C2	Aldo-keto reductase family 1 member C2 OS=Homo sapiens OX=9606 GN=AKR1C2 PE=1 SV=3		36234000	37355000	26819000	0	36794500	13409500	1927
Q14684	Ribosomal RNA processing protein 1 homolog B	RRP1B	Ribosomal RNA processing protein 1 homolog B OS=Homo sapiens OX=9606 GN=RRP1B PE=1 SV=3		12532000	13376000	0	27300000	12954000	13650000	1928
Q9NX40	OCIA domain-containing protein 1	OCIAD1	OCIA domain-containing protein 1 OS=Homo sapiens OX=9606 GN=OCIAD1 PE=1 SV=1		23871000	23396000	12384000	15011000	23633500	13697500	1929
Q8NBJ7	Sulfatase-modifying factor 2	SUMF2	Inactive C-alpha-formylglycine-generating enzyme 2 OS=Homo sapiens OX=9606 GN=SUMF2 PE=1 SV=2		12662000	0	13436000	14089000	6331000	13762500	1930
P51991	Heterogeneous nuclear ribonucleoprotein A3	HNRNPA3	Heterogeneous nuclear ribonucleoprotein A3 OS=Homo sapiens OX=9606 GN=HNRNPA3 PE=1 SV=2		0	0	0	27895000	0	13947500	1931
Q92974	Rho guanine nucleotide exchange factor 2	ARHGEF2	Rho guanine nucleotide exchange factor 2 OS=Homo sapiens OX=9606 GN=ARHGEF2 PE=1 SV=4		34891000	32713000	27991000	0	33802000	13995500	1932
O43676	NADH dehydrogenase [ubiquinone] 1 beta subcomplex subunit 3	NDUFB3	NADH dehydrogenase [ubiquinone] 1 beta subcomplex subunit 3 OS=Homo sapiens OX=9606 GN=NDUFB3 PE=1 SV=3		29938000	31255000	28036000	0	30596500	14018000	1933
Q96GW9	Methionine--tRNA ligase, mitochondrial	MARS2	Methionine--tRNA ligase, mitochondrial OS=Homo sapiens OX=9606 GN=MARS2 PE=1 SV=2		0	12378000	12603000	15547000	6189000	14075000	1934
Q8NB49	Phospholipid-transporting ATPase IG	ATP11C	Phospholipid-transporting ATPase IG OS=Homo sapiens OX=9606 GN=ATP11C PE=1 SV=3		16166000	30691000	28248000	0	23428500	14124000	1935
Q9BQ61	Uncharacterized protein C19orf43	C19orf43	Telomerase RNA component interacting RNase OS=Homo sapiens OX=9606 GN=TRIR PE=1 SV=1		0	0	0	28295000	0	14147500	1936
O96011	Peroxisomal membrane protein 11B	PEX11B	Peroxisomal membrane protein 11B OS=Homo sapiens OX=9606 GN=PEX11B PE=1 SV=1		0	0	0	28401000	0	14200500	1937
Q8NBL1	Protein O-glucosyltransferase 1	POGLUT1	Protein O-glucosyltransferase 1 OS=Homo sapiens OX=9606 GN=POGLUT1 PE=1 SV=1		0	0	14248000	14226000	0	14237000	1938
Q9H6X2	Anthrax toxin receptor 1	ANTXR1	Anthrax toxin receptor 1 OS=Homo sapiens OX=9606 GN=ANTXR1 PE=1 SV=2		28831000	29371000	28737000	0	29101000	14368500	1939
P84243	Histone H3.3	H3F3A	Histone H3.3 OS=Homo sapiens OX=9606 GN=H3-3A PE=1 SV=2		125690000	32853000	28842000	0	79271500	14421000	1940
Q9BY49	Peroxisomal trans-2-enoyl-CoA reductase	PECR	Peroxisomal trans-2-enoyl-CoA reductase OS=Homo sapiens OX=9606 GN=PECR PE=1 SV=2		0	0	29111000	0	0	14555500	1941
P04920;P48751	Anion exchange protein 2	SLC4A2	Anion exchange protein 2 OS=Homo sapiens OX=9606 GN=SLC4A2 PE=1 SV=4		42250000	0	29145000	0	21125000	14572500	1942
Q6PK04	Coiled-coil domain-containing protein 137	CCDC137	Coiled-coil domain-containing protein 137 OS=Homo sapiens OX=9606 GN=CCDC137 PE=1 SV=1		22877000	0	29251000	0	11438500	14625500	1943
Q9UL40	Zinc finger protein 346	ZNF346	Zinc finger protein 346 OS=Homo sapiens OX=9606 GN=ZNF346 PE=1 SV=1		17327000	0	13837000	15677000	8663500	14757000	1944
Q8NC56	LEM domain-containing protein 2	LEMD2	LEM domain-containing protein 2 OS=Homo sapiens OX=9606 GN=LEMD2 PE=1 SV=1		27516000	38890000	0	29572000	33203000	14786000	1945
P49768	Presenilin-1;Presenilin-1 NTF subunit;Presenilin-1 CTF subunit;Presenilin-1 CTF12	PSEN1	Presenilin-1 OS=Homo sapiens OX=9606 GN=PSEN1 PE=1 SV=1		42419000	42420000	29766000	0	42419500	14883000	1946
P60228	Eukaryotic translation initiation factor 3 subunit E	EIF3E	Eukaryotic translation initiation factor 3 subunit E OS=Homo sapiens OX=9606 GN=EIF3E PE=1 SV=1		0	0	0	29783000	0	14891500	1947
Q9Y3L5	Ras-related protein Rap-2c	RAP2C	Ras-related protein Rap-2c OS=Homo sapiens OX=9606 GN=RAP2C PE=1 SV=1		19087000	17834000	17579000	12415000	18460500	14997000	1948
P10646	Tissue factor pathway inhibitor	TFPI	Tissue factor pathway inhibitor OS=Homo sapiens OX=9606 GN=TFPI PE=1 SV=1		0	34520000	30004000	0	17260000	15002000	1949
Q96AJ9	Vesicle transport through interaction with t-SNAREs homolog 1A	VTI1A	Vesicle transport through interaction with t-SNAREs homolog 1A OS=Homo sapiens OX=9606 GN=VTI1A PE=1 SV=2		24132000	0	30161000	0	12066000	15080500	1950
Q9Y2U8	Inner nuclear membrane protein Man1	LEMD3	Inner nuclear membrane protein Man1 OS=Homo sapiens OX=9606 GN=LEMD3 PE=1 SV=2		25344000	20365000	0	30207000	22854500	15103500	1951
P55786	Puromycin-sensitive aminopeptidase	NPEPPS	Puromycin-sensitive aminopeptidase OS=Homo sapiens OX=9606 GN=NPEPPS PE=1 SV=2		0	0	14930000	15452000	0	15191000	1952
P30044	Peroxiredoxin-5, mitochondrial	PRDX5	Peroxiredoxin-5, mitochondrial OS=Homo sapiens OX=9606 GN=PRDX5 PE=1 SV=4		20794000	22638000	16445000	14035000	21716000	15240000	1953
P54920;Q9H115	Alpha-soluble NSF attachment protein	NAPA	Alpha-soluble NSF attachment protein OS=Homo sapiens OX=9606 GN=NAPA PE=1 SV=3		0	14114000	19220000	11417000	7057000	15318500	1954
P56199	Integrin alpha-1	ITGA1	Integrin alpha-1 OS=Homo sapiens OX=9606 GN=ITGA1 PE=1 SV=2		33318000	0	0	30749000	16659000	15374500	1955
Q8NCH0	Carbohydrate sulfotransferase 14	CHST14	Carbohydrate sulfotransferase 14 OS=Homo sapiens OX=9606 GN=CHST14 PE=1 SV=2		0	0	15623000	15239000	0	15431000	1956
P51116	Fragile X mental retardation syndrome-related protein 2	FXR2	Fragile X mental retardation syndrome-related protein 2 OS=Homo sapiens OX=9606 GN=FXR2 PE=1 SV=2		25671000	26085000	30948000	0	25878000	15474000	1957
Q6Y1H2	Very-long-chain (3R)-3-hydroxyacyl-CoA dehydratase 2	HACD2	Very-long-chain (3R)-3-hydroxyacyl-CoA dehydratase 2 OS=Homo sapiens OX=9606 GN=HACD2 PE=1 SV=1		0	0	0	31046000	0	15523000	1958
O15226	NF-kappa-B-repressing factor	NKRF	NF-kappa-B-repressing factor OS=Homo sapiens OX=9606 GN=NKRF PE=1 SV=2		44375000	36795000	31247000	0	40585000	15623500	1959
Q68DH5	LMBR1 domain-containing protein 2	LMBRD2	G-protein coupled receptor-associated protein LMBRD2 OS=Homo sapiens OX=9606 GN=LMBRD2 PE=1 SV=1		0	29163000	31660000	0	14581500	15830000	1960
Q15029	116 kDa U5 small nuclear ribonucleoprotein component	EFTUD2	116 kDa U5 small nuclear ribonucleoprotein component OS=Homo sapiens OX=9606 GN=EFTUD2 PE=1 SV=1		23360000	32355000	7348200	24503000	27857500	15925600	1961
Q99439;Q15417	Calponin-2	CNN2	Calponin-2 OS=Homo sapiens OX=9606 GN=CNN2 PE=1 SV=4		16691000	18713000	16561000	15307000	17702000	15934000	1962
[truncated: 1,539 more rows]
