# Supplementary material for: An ER phospholipid hydrolase drives ER-associated mitochondrial constriction for fission and fusion
Source: eLife. 2022 Nov 30;11:e84279. doi: 10.7554/eLife.84279 (PMC9725753; doi:10.7554/eLife.84279)
Supplement: Figure 2—source data 1. [file elife-84279-fig2-data1.xlsx]

## Sheet: Fig 2D
siC	siABHD16A	siABHD16A+ABHD16A		Tukey's multiple comparisons test	Mean Diff.	95.00% CI of diff.	Below threshold?	Summary	Adjusted P Value
0.301645	0.096176	0.35471		siC vs. siABHD16A	0.2073	0.1595 to 0.2551	Yes	****	<0.0001	A-B
0.344555	0.083455	0.306368		siC vs. siABHD16A+ABHD16A	0.01491	-0.03155 to 0.06137	No	ns	0.726	A-C
0.16655	0.067609	0.306958		siABHD16A vs. siABHD16A+ABHD16A	-0.1924	-0.2388 to -0.1459	Yes	****	<0.0001	B-C
0.393408	0.150818	0.269078
0.362312	0.048193	0.263219
0.386589	0.215813	0.248614
0.270622	0.15755	0.178784
0.294569	0.070244	0.439945
0.318848	0.097083	0.303885
0.433678	0.10192	0.337176
0.349678	0.040915	0.227282
0.407035	0.111152	0.462519
0.290305	0.104753	0.259441
0.348528	0.122645	0.322158
0.309816	0.155919	0.40767
0.494246	0.123911	0.241281
0.37876	0.092306	0.254566
0.372984	0.107468	0.290626
0.333468	0.095776	0.291867
0.242027	0.086102	0.203795
0.456044	0.103095	0.203037
0.302317	0.07696	0.437525
0.282378	0.112078	0.127931
0.304745	0.134009	0.364965
0.420026	0.08561	0.312509
0.256307	0.097106	0.202847
0.190153	0.129195	0.430163
0.218452	0.070021	0.127752
0.304727	0.086558	0.648387
0.117564	0.2378	0.25113
0.312336	0.209355	0.302803
0.327113	0.0456	0.342254
0.20083	0.134801	0.218137
		0.427748
		0.25016
		0.266232
		0.329104

## Sheet: Fig 2E
siC	siABHD16A	siABHD16A+ABHD16A		Tukey's multiple comparisons test	Mean Diff.	95.00% CI of diff.	Below threshold?	Summary	Adjusted P Value
35.7143	20	38.4615		siC vs. siABHD16A	28.72	21.68 to 35.76	Yes	****	<0.0001	A-B
31.5789	26.9231	50		siC vs. siABHD16A+ABHD16A	-9.554	-17.70 to -1.408	Yes	*	0.0173	A-C
33.3333	23.0769	52.9412		siABHD16A vs. siABHD16A+ABHD16A	-38.27	-46.33 to -30.22	Yes	****	<0.0001	B-C
35.2941	17.8571	64.7059
38.4615	10	47.3684
37.5	7.14286	53.3333
23.5294	5.26316	56.25
42.8571	17.2414	53.3333
33.3333	30	35.7143
37.5	22.2222	72.2222
50	23.3333	62.5
41.6667	13.3333	50
38.4615	20.8333	40.9091
35.2941	6.25	60
47.0588	11.1111	66.6667
73.6842	20	76.9231
52.9412	13.6364	90
75	15.7895	50
40	10	38.4615
41.6667	40	75
41.1765	15.3846
73.6842	33.3333
61.9048	25
45	15.7895
58.3333	22.7273
34.7826	28.5714
60	12.5
60	12
61.5385	16.6667
60	5.88235
46.1538	21.7391
62.5	29.4118
	19.0476
	15.7895

## Sheet: Fig 2F
siC	siABHD16A	siABHD16A+ABHD16A		Tukey's multiple comparisons test	Mean Diff.	95.00% CI of diff.	Below threshold?	Summary	Adjusted P Value
0.312662	0.137142	0.273268		siC vs. siABHD16A	0.2155	0.1721 to 0.2588	Yes	****	<0.0001	A-B
0.363446	0.238212	0.210349		siC vs. siABHD16A+ABHD16A	0.02944	-0.01636 to 0.07524	No	ns	0.2803	A-C
0.297811	0.176469	0.315279		siABHD16A vs. siABHD16A+ABHD16A	-0.186	-0.2311 to -0.1409	Yes	****	<0.0001	B-C
0.312007	0.107999	0.209338
0.352798	0.041441	0.307764
0.187099	0.091986	0.328537
0.349678	0.095498	0.432377
0.407035	0.111967	0.281488
0.290305	0.122645	0.389245
0.348528	0.155919	0.224137
0.309816	0.123911	0.305517
0.494246	0.092306	0.498067
0.37876	0.107468	0.453002
0.372984	0.095776	0.304595
0.333468	0.086102	0.30786
0.337893	0.103095	0.287992
0.370609	0.07696	0.297463
0.454064	0.112078	0.353872
0.320656	0.134009	0.463546
0.474264	0.08561	0.223275
0.356656	0.180082	0.433913
0.339123	0.241318	0.367854
0.23523	0.18683	0.166929
0.24496	0.133819	0.200282
0.414764	0.121528	0.225822
0.306763	0.113715
0.438982	0.116208
0.297193	0.155353
0.2716	0.05895
	0.15981
	0.217514
