# Supplementary material for: An ER phospholipid hydrolase drives ER-associated mitochondrial constriction for fission and fusion
Source: eLife. 2022 Nov 30;11:e84279. doi: 10.7554/eLife.84279 (PMC9725753; doi:10.7554/eLife.84279)
Supplement: Figure 3—source data 1. [file elife-84279-fig3-data1.xlsx]

## Sheet: Fig 3A-F
siCTRL				sABHD16A					siABHD16A+ABHD16A-Halo
		if fusion, tip of mid?				if fusion, tip of mid?					if fusion, tip of mid?
fusion/mito/min	fission/mito/min	tip-to-tip	tip-to-middle	fusion/mito/min	fission/mito/min	tip-to-tip	tip-to-middle		fusion/mito/min	fission/mito/min	tip-to-tip	tip-to-middle			total number fission events
0.2	0		1	0	0				0	0					siCTRL	siABHD16A	siABHD16A+ABHD16A-Halo
0.4	0.2		2	0	0				0.4	0.2	1	1			0	0	0
0.2	0.2	1		0	0				0.2	0		1			1	0	1
0	0.2			0	0				0	0.2					1	0	0
0.4	0		2	0	0				0.2	0		1			1	0	1
0.2	0.2	1		0	0.2				0.2	0.6		1			0	0	0
0	0			0	0				0.6	0		3			1	1	3
0.2	0.2		1	0	0				0.2	0	1				0	0	0
0.2	0		1	0.2	0	1			0	0					1	0	0
0.4	0		2	0	0				0.2	0		1			0	0	0
0.4	0		2	0	0.2				0	0					0	0	0
0.2	0	1		0.2	0	1	0		0.2	0		1			0	1	0
0	0			0	0				0	0.2					0	0	0
0.4	0.4	2		0.4	0.4	1	1		0	0.2					0	0	1
0.6	0.6		3	0	0				0.4	0	1	1			2	2	1
0.4	0.2	1	1	0	0				0.2	0.2		1			3	0	0
0.4	0	1	1	0	0.2				0.2	0.4		1			1	0	1
0.4	0.4		2	0	0.2				0	0.2					0	1	2
0.2	0		1	0	0.2				0.2	0.2		1			2	1	1
0.6	0.2	2	1	0.2	0.2	1	0		0.4	0		2			0	1	1
0.2	0.2	1		0.2	0		1		0.4	0.4	1	1			1	1	0
0.2	0	1		0	0				0.4	0		2			1	0	2
0.4	0		2	0	0				0.6	0	1	2			0	0	0
0.6	0.4		3	0.4	0.2	1	1		0.4	0	1	1			0	0	0
0.2	0	1		0	0				0.2	0		1			2	1	0
0.4	0		2	0.2	0	1			0.6	0.2		3			0	0	0
0	0.2			0.2	0	1			0	0.2					0	0	1
0.4	0.2	1	1	0	0				0	0.2					1	0	1
0.4	0.2	1	1	0	0				0	0					1	0	1
0.4	0	1	1	0	0.2				0.4	0	1	1			1	0	0
0.2	0.4		1	0.4	0.2	1	1		0	0					0	1	0
0	0			0	0				0.2	0	1				2	1	0
0.2	0		1	0.2	0	1			0.2	0	1				0	0	0
0.8	0.4		4	0	0				0	0					0	0	0
0.6	0.2		3	0	0				0.4	0.6		2			2	0	0
0.2	0.4		1	0	0				0	0.4					1	0	3
0	0			0.2	0.4	1			0.4	0	1	1			2	0	2
0	0			0	0				0.4	0	1	1			0	2	0
0	0.4			0	0				0.4	0.2		2			0	0	0
0.2	0.4		1	0.2	0		1		0.2	0.2		1			2	0	1
0.4	0		2	0	0				0	0.2					2	0	1
0.2	0.4		1	0	0				0.6	0.2		3				0	1
0	0.4			0	0				0.2	0		1			2	0	1
0.2	0.2		1	0	0				0.2	0.2		1			2	0	0
0.4	0.6	1	1	0	0				0.2	0		1			1	0	1
0	0			0	0				0.4	0.4	1	1			3	0	0
0	0			0	0				0	0					0	0	2
0	0.6			0	0				0.4	0		2			0	0	0
0.4	0.4		2	0.2	0		1		0	0					3	0	0
0.2	0		1	0	0				0	0					2	0	0
0.4	0.2		2	0	0				0.2	0.2		1			0	0	0
0	0			0	0				0.2	0.2	1				1	0	1
0	0			0	0				0	0.4					0	0	1
0.2	0.2	1		0	0				0.4	0		2			0	0	2
0.2	0	1		0	0				0.4	0.2		2			1	0	0
0.4	0.2		2	0	0.2				0	0					0	0	1
0.2	0.2		1	0	0				0.2	0.2		1			1	1	0
0.4	0	1	1	0.2	0	1			0.4	0.8		2			1	0	1
0.2	0.2		1	0.4	0	1	1		0	0					0	0	4
0	0			0	0				0.2	0.2		1			1	0	0
0.4	0.6		2	0	0				0.2	0.4		1			0	0	1
0.2	0.2		1	0	0				0	0.2					3	0	2
0.6	0.2	2	1	0.2	0	1			0	0.2					1	0	1
0.2	0.2		1	0	0				0.4	0.2	1	1			1	0	1
0	0			0	0				0	0					1	0	1
0.2	0.2	1		0	0				0.2	0.4		1			0	0	0
0.2	0.2		1	0.2	0.2		1		0	0					1	0	2
0.2	0		1	0	0.2				0	0					1	1	0
0.25	0.167647	tip-to-tip fusion events	tip-to-middle fusion events	0	0				0.2	0		1			0	1	0
0.190443	0.18157	22	63	0.0608696	0.0463768	tip-to-tip fusion events	tip-to-middle fusion events		0.4	0	1	1				0	0
		tip-to-tip fusion rate (fusion/mito/min	tip-to-mid fusion rate (fusion/mito/min)	0.115322	0.0978891	13	8		0	0.2							0
68	mito	0.0647059	0.185294			tip-to-tip fusion rate (fusion/mito/min	tip-to-mid fusion rate (fusion/mito/min)		0.2	0.4		1					1
30	cells			69	mito	0.0376812	0.0231884		0.4	0.2	1	1					2
85	total fusion events			29	cells				0	0							1
				21	total fusion events				0	0							0
									0.4	0.4		2					0
									0.4	0.2	1	1					2
									0.4	0.2	1	1					1
									0.4	0.2		2		`			1
									0	0.2							1
									0.2	0		1					1
									0	0							0
									0	0							0
									0	0							0
									0	0							0
									0.195294	0.134118	tip-to-tip fusion events	tip-to-middle fusion events					0
									0.185103	0.170121	18	65
											tip-to-tip fusion rate (fusion/mito/min	tip-to-mid fusion rate (fusion/mito/min)			57	16	57
									85	mito	0.0423529	0.152941
									31	cells
									83	total fusion events
