# Supplementary material for: An ER phospholipid hydrolase drives ER-associated mitochondrial constriction for fission and fusion
Source: eLife. 2022 Nov 30;11:e84279. doi: 10.7554/eLife.84279 (PMC9725753; doi:10.7554/eLife.84279)
Supplement: Figure 4—figure supplement 1—source data 2. [file elife-84279-fig4-figsupp1-data2.xlsx]

## Sheet: Fig S4E
siCTRL	siABHD16A	siABHD16A+ABHD16A		Tukey's multiple comparisons test	Mean Diff.	95.00% CI of diff.	Below threshold?	Summary	Adjusted P Value
1.66753	2.9995	1.39667		siCTRL vs. siABHD16A	-1.871	-2.380 to -1.361	Yes	****	<0.0001	A-B
1.69154	3.79438	2.183		siCTRL vs. siABHD16A+ABHD16A	0.304	-0.2458 to 0.8538	No	ns	0.3904	A-C
2.28073	3.11825	1.40013		siABHD16A vs. siABHD16A+ABHD16A	2.175	1.628 to 2.722	Yes	****	<0.0001	B-C
1.24865	2.9166	1.10567
1.77494	4.05475	1.37883
1.82709	3.81125	1.75087
1.56794	3.23733	1.01895
1.64358	2.83645	1.58223
1.58539	5.67812	1.01707
2.67963	2.64055	1.38015
2.43177	4.437	1.50171
2.86075	6.15667	1.9335
2.15694	4.683	2.665
1.18117	3.09367	1.20143
1.59963	6.71033	1.257
1.26859	2.0909	0.572393
1.50545	7.83	1.45905
2.34567	3.39067	1.52845
1.56986	3.5653	1.1897
1.39628	1.71305	2.32231
2.06907	5.80044	1.34833
1.69471	3.72987	1.8775
1.91731	4.33857	2.14536
2.22543	1.79127	1.72357
1.56586	4.5709	1.86645
1.5138	2.66459	1.5975
1.7366	3.15625	1.253
1.41586	2.98637	1.31109
1.678	2.20311	1.60161
3.988	2.72022	2.06511
1.6715	3.15345
1.34617	2.4125
2.49027	3.15317
1.58893	3.90411
1.66644	3.53909
2.4935	5.68322
1.24095	3.58487
1.91	1.09868
1.98345	4.46043
	5.462
