# Supplementary material for: An ER phospholipid hydrolase drives ER-associated mitochondrial constriction for fission and fusion
Source: eLife. 2022 Nov 30;11:e84279. doi: 10.7554/eLife.84279 (PMC9725753; doi:10.7554/eLife.84279)
Supplement: Figure 4—source data 1. [file elife-84279-fig4-data1.xlsx]

## Sheet: Fig 4D
siCTRL	siABHD16A	siABHD16A+ABHD16A	siABHD16A+ABHD16AER	siABHD16A+ABHD16Amito		Tukey's multiple comparisons test	Mean Diff.	95.00% CI of diff.	Below threshold?	Summary	Adjusted P Value
1.88282	3.33583	2.69786	2.0853	2.3577		siCTRL vs. siABHD16A	-2.195	-2.821 to -1.568	Yes	****	<0.0001	A-B
2.433	4.81957	2.25878	1.73589	3.0288		siCTRL vs. siABHD16A+ABHD16A	-0.2014	-0.8738 to 0.4710	No	ns	0.9223	A-C
2.52338	6.70775	2.78589	1.19531	5.3364		siCTRL vs. siABHD16A+ABHD16AER	0.2759	-0.3506 to 0.9023	No	ns	0.7432	A-D
2.20514	6.50467	1.89222	1.76245	5.45029		siCTRL vs. siABHD16A+ABHD16Amito	-1.834	-2.470 to -1.198	Yes	****	<0.0001	A-E
2.07317	7.10567	2.1092	2.24467	4.7272		siABHD16A vs. siABHD16A+ABHD16A	1.993	1.302 to 2.684	Yes	****	<0.0001	B-C
2.13029	5.284	2.27029	3.6012	2.50443		siABHD16A vs. siABHD16A+ABHD16AER	2.471	1.824 to 3.117	Yes	****	<0.0001	B-D
2.34388	4.194	2.4965	1.44408	2.76629		siABHD16A vs. siABHD16A+ABHD16Amito	0.3609	-0.2951 to 1.017	No	ns	0.5529	B-E
2.26378	3.32743	2.10318	1.40838	3.3857		siABHD16A+ABHD16A vs. siABHD16A+ABHD16AER	0.4773	-0.2139 to 1.168	No	ns	0.3191	C-D
1.78911	1.67121	1.4785	2.05388	5.7942		siABHD16A+ABHD16A vs. siABHD16A+ABHD16Amito	-1.632	-2.332 to -0.9325	Yes	****	<0.0001	C-E
2.84822	4.94333	2.40738	1.26647	7.39		siABHD16A+ABHD16AER vs. siABHD16A+ABHD16Amito	-2.11	-2.766 to -1.454	Yes	****	<0.0001	D-E
3.38843	3.58675	2.3943	1.33079	7.4732
1.787	4.41457	3.15971	1.9738	4.1257
1.66241	2.9749	1.47664	1.88438	4.0584
2.125	3.72755	2.111	1.70793	4.46933
1.91345	4.23764	1.97708	2.46078	3.5533
2.23071	5.2525	2.78986	1.88555	3.3648
2.26077	3.96056	2.23205	1.72785	3.40537
1.60959	3.22233	1.503	1.63977	2.4175
3.3708	5.5002	2.52625	2.43231	1.7553
1.8351	1.77773	2.24786	2.30122	4.6256
1.9372	3.65056	2.201	1.17992	4.278
3.46933	4.669	2.16822	1.99573	4.8135
1.913	3.501	7.054	1.24207	2.9211
1.34011	4.77686	2.35944	1.47915	4.05543
1.70221	4.37814	1.91467	1.391	3.98183
2.7744	5.27	1.38175	1.79327	3.97373
1.7275	2.73431	1.5369	1.91221	2.85482
1.31167	3.5766	2.55889	3.53911	3.5302
1.4625	4.428		0.847571	4.36
1.47989	6.055		1.90391	3.049
0.948375	4.42122		1.91329	3.988
2.18644	4.54286		1.75433	2.35875
2.28521	3.06256		3.17786	5.2623
2.00936	6.2769		1.55711	4.3426
1.85875	5.0827		2.52846
2.90414	3.76158		1.4375
2.1
3.12238
3.05329
2.095
2.16425

## Sheet: Fig 4G
EV	ABHD16A OE	ABHD16AER OE	ABHD16Amito OE		Tukey's multiple comparisons test	Mean Diff.	95.00% CI of diff.	Below threshold?	Summary	Adjusted P Value
1.76471	0.476521	1.80536	4.36321		EV vs. ABHD16A OE	1.717	1.300 to 2.133	Yes	****	<0.0001	A-B
1.83478	0.56925	0.743267	1.80975		EV vs. ABHD16AER OE	1.405	0.9841 to 1.826	Yes	****	<0.0001	A-C
2.10625	0.564029	1.95754	1.323		EV vs. ABHD16Amito OE	0.01425	-0.4179 to 0.4464	No	ns	0.9998	A-D
2.89291	0.709471	1.02207	3.9986		ABHD16A OE vs. ABHD16AER OE	-0.3114	-0.7089 to 0.08601	No	ns	0.1793	B-C
1.91261	0.467923	0.571644	1.84007		ABHD16A OE vs. ABHD16Amito OE	-1.702	-2.112 to -1.293	Yes	****	<0.0001	B-D
1.7729	0.679316	0.747545	2.84989		ABHD16AER OE vs. ABHD16Amito OE	-1.391	-1.805 to -0.9766	Yes	****	<0.0001	C-D
3.1867	0.654688	0.564778	1.23953
2.25164	0.429467	0.712238	2.25092
2.46057	0.1945	0.990857	2.9695
2.275	0.4871	0.884333	1.9364
1.69938	0.896	0.196222	3.91031
2.4295	0.4407	1.07573	3.185
1.251	0.637364	0.698783	2.044
3.858	0.43425	0.50432	2.48787
1.69706	0.930917	2.3665	2.5006
2.40236	0.524556	0.436467	1.37674
2.32184	0.911692	0.942767	5.2914
2.20564	0.939833	0.829217	3.50914
1.86991	0.4953	1.00353	1.14082
1.9166	0.900571	1.10367	1.32578
2.38487	0.74044	0.844562	1.33964
2.82406	0.516273	2.27779	2.49283
2.12707	1.06638	0.2965	1.35471
1.92595	0.567688	1.20369	1.94714
2.08869	1.35429	0.630227	3.2234
1.75033	0.490455	1.10888	2.47343
3.12	0.600222	0.958042	1.68189
2.38955	0.971538	0.646069	1.51794
2.81562	0.891189	0.86524	2.8754
4.7992	1.17984	0.999133	1.80758
2.53877	0.456833	1.21624	1.59035
2.79777	0.396875	0.597909	3.79029
	0.691188	1.45962	1.16317
	0.8772	0.951217	1.306
	0.32175	0.577133
	1.06956	1.50116
	0.290632	0.656036
	0.382154	0.521262
	0.265357
	0.45565
