# Supplementary material for: An ER phospholipid hydrolase drives ER-associated mitochondrial constriction for fission and fusion
Source: eLife. 2022 Nov 30;11:e84279. doi: 10.7554/eLife.84279 (PMC9725753; doi:10.7554/eLife.84279)
Supplement: Figure 5—source data 1. [file elife-84279-fig5-data1.xlsx]

## Sheet: Fig 5C
siCTRL	siABHD16A	siABHD16A+ABHD16A
46.9	51.5	34
48.3	51	55
34.9	45.9	34
61.2	46.3	60.2
60.3	50.4	29.9
50.4	71.6	34.2
45.1	58.3	43
33.2	61.9	57.1
48.3	50.3	48.5
29.6	27.5	61.7
52.5	44.2	54.8
64.4	57.5	35.5
49.6	51.5	37.6
45.7	53.2	37.7
50.2	44.3	40.1
49.3	42	38
49.7	50.9	41.1
21.5	58.8	47.3
59.6	49.1	76
57	56.9	73.9
29.3	42.8	35.7
36.1	40.2	60.5
32.3	45.8	52.6
46.6	31	69.6
	63.1	52.2
	37.8	53.2
	52.6	45.6
	65.1
	45.8

## Sheet: Fig 5D
siCTRL	siABHD16A	siABHD16A+ABHD16A		Tukey's multiple comparisons test	Mean Diff.	95.00% CI of diff.	Below threshold?	Summary	Adjusted P Value
11.3	17.8	17.5		siCTRL vs. siABHD16A	-12.98	-18.35 to -7.621	Yes	****	<0.0001	A-B
9.4	32.6	21		siCTRL vs. siABHD16A+ABHD16A	-2.083	-7.536 to 3.369	No	ns	0.6337	A-C
9.4	7.4	5.8		siABHD16A vs. siABHD16A+ABHD16A	10.9	5.703 to 16.10	Yes	****	<0.0001	B-C
10.6	17.1	16.4
11.6	11.9	8.6
14.8	37.1	9.1
12.2	20	18.5
5.4	49.3	19.1
4.4	20.7	12
10.9	12.6	18.3
22	22.9	23.6
8.9	27.5	19.9
13.4	37.4	4.4
11.2	19.5	9.2
10.7	30	15.7
15.8	22.2	12.2
20.5	41.5	8.4
4.2	32.4	19.1
25.9	21.3	21.3
10.1	21.1	15.9
7.9	18.6	11.3
7.4	25.2	14.1
4.1	27.8	4.8
17.5	9.1	14.3
	18.9	18
	25.8	5.5
	30.1	6.8
	50.4
	6.2
