# Supplementary material for: An ER phospholipid hydrolase drives ER-associated mitochondrial constriction for fission and fusion
Source: eLife. 2022 Nov 30;11:e84279. doi: 10.7554/eLife.84279 (PMC9725753; doi:10.7554/eLife.84279)
Supplement: Figure 6—figure supplement 1—source data 2. [file elife-84279-fig6-figsupp1-data2.xlsx]

## Sheet: Fig S6G
siCTRL	siABHD16A	siABHD16A+ABHD16A-mNG	siABHD16A+ABHD16AATmut-mNG	siABHD16A+ABHD16Aα/βHDmut-mNG	siABHD16A+ABHD16ALLMmut-mNG		Tukey's multiple comparisons test	Mean Diff.	95.00% CI of diff.	Below threshold?	Summary	Adjusted P Value
1.31167	4.669	2.69786	2.83656	4.27733	0.678714		siCTRL vs. siABHD16A	-2.195	-2.902 to -1.488	Yes	****	<0.0001	A-B
1.4625	3.501	2.25878	3.8982	5.50225	0.921357		siCTRL vs. + WT	-0.2014	-0.9602 to 0.5574	No	ns	0.9731	A-C
1.47989	4.77686	2.78589	4.4504	6.08125	1.77667		siCTRL vs. + AT mut	-2.034	-2.785 to -1.283	Yes	****	<0.0001	A-D
0.948375	4.37814	1.89222	4.5074	2.7864	1.40664		siCTRL vs. + α/βHD mut	-2.442	-3.201 to -1.683	Yes	****	<0.0001	A-E
2.18644	5.27	2.1092	4.16443	8.64933	1.91745		siCTRL vs. + LLM mut	0.4251	-0.3259 to 1.176	No	ns	0.5797	A-F
2.28521	2.73431	2.27029	4.10771	3.604	2.1407		siABHD16A vs. + WT	1.993	1.213 to 2.773	Yes	****	<0.0001	B-C
2.00936	3.5766	2.4965	7.46967	4.886	1.41069		siABHD16A vs. + AT mut	0.1608	-0.6116 to 0.9331	No	ns	0.991	B-D
1.85875	4.428	2.10318	6.4198	5.744	2.101		siABHD16A vs. + α/βHD mut	-0.2475	-1.027 to 0.5324	No	ns	0.9426	B-E
2.90414	6.055	1.4785	4.207	4.8635	1.83864		siABHD16A vs. + LLM mut	2.62	1.848 to 3.392	Yes	****	<0.0001	B-F
2.1	4.42122	2.40738	2.50033	5.7972	1.31688		+ WT vs. + AT mut	-1.833	-2.653 to -1.013	Yes	****	<0.0001	C-D
3.12238	4.54286	2.3943	4.6316	2.34357	1.5698		+ WT vs. + α/βHD mut	-2.241	-3.068 to -1.414	Yes	****	<0.0001	C-E
3.05329	3.06256	3.15971	6.375	3.9905	1.66167		+ WT vs. + LLM mut	0.6265	-0.1936 to 1.447	No	ns	0.2427	C-F
2.095	6.2769	1.47664	5.39967	4.583	1.33356		+ AT mut vs. + α/βHD mut	-0.4082	-1.228 to 0.4118	No	ns	0.7065	D-E
2.16425	5.0827	2.111	4.96067	4.44229	1.6251		+ AT mut vs. + LLM mut	2.459	1.646 to 3.272	Yes	****	<0.0001	D-F
2.84822	3.76158	1.97708	5.81117	4.97575	1.6947		+ α/βHD mut vs. + LLM mut	2.867	2.047 to 3.687	Yes	****	<0.0001	E-F
3.38843	1.67121	2.78986	4.1796	3.47071	3.15633
1.787	4.94333	2.23205	4.59409	1.8242	2.55389
1.66241	3.58675	1.503	3.84833	6.89125	1.7501
2.125	4.41457	2.52625	3.1724	3.92075	0.764059
1.91345	2.9749	2.24786	5.12812	4.16433	3.45338
2.23071	3.72755	2.201	3.74233	4.17178	1.42573
2.26077	4.23764	2.16822	4.712	6.522	2.36567
1.60959	5.2525	7.054	1.92542	4.41243	1.23107
3.3708	3.96056	2.35944	1.93791	3.84756	1.061
1.8351	3.22233	1.91467	3.27717	5.2496	1.20717
1.9372	5.5002	1.38175	3.78814	3.27722	3.07525
3.46933	1.77773	1.5369	4.2685	4.32686	1.5226
1.913	3.65056	2.55889	2.509	4.22957	1.67662
1.34011	3.33583		2.77467		1.6476
1.70221	4.81957
2.7744	6.70775
1.7275	6.50467
1.88282	7.10567
2.433	5.284
2.52338	4.194
2.20514	3.32743
2.07317
2.13029
2.34388
2.26378
1.78911
