# Supplementary material for: An ER phospholipid hydrolase drives ER-associated mitochondrial constriction for fission and fusion
Source: eLife. 2022 Nov 30;11:e84279. doi: 10.7554/eLife.84279 (PMC9725753; doi:10.7554/eLife.84279)
Supplement: Figure 6—source data 1. [file elife-84279-fig6-data1.xlsx]

## Sheet: Fig 6C
siCTRL	siABHD16A	siABHD16A+ABHD16A-mNG	siABHD16A+ABHD16AATmut-mNG	siABHD16A+ABHD16Aα/βHDmut-mNG			Tukey's multiple comparisons test	Mean Diff.	95.00% CI of diff.	Below threshold?	Summary	Adjusted P Value
57.1429	11.5385	75	76.4706	30			siCTRL vs. siABHD16A	39.78	31.20 to 48.36	Yes	****	<0.0001	A-B
65	33.3333	80	61.9048	25			siCTRL vs. siABHD16A+ABHD16A-mNG	-11.92	-21.29 to -2.545	Yes	**	0.0054	A-C
66.6667	13.6364	76.4706	63.1579	25			siCTRL vs. siABHD16A+ABHD16AATmut-mNG	7.401	-1.337 to 16.14	No	ns	0.1381	A-D
61.5385	16.6667	73.913	38.0952	21.7391			siCTRL vs. siABHD16A+ABHD16Aα/βHDmut-mNG	35.33	26.50 to 44.15	Yes	****	<0.0001	A-E
68.75	19.3548	70.5882	52.1739	10			siABHD16A vs. siABHD16A+ABHD16A-mNG	-51.69	-61.13 to -42.26	Yes	****	<0.0001	B-C
70.5882	18.1818	68	50	50			siABHD16A vs. siABHD16A+ABHD16AATmut-mNG	-32.38	-41.19 to -23.57	Yes	****	<0.0001	B-D
68.421	15.3846	75	31.8182	59.2593			siABHD16A vs. siABHD16A+ABHD16Aα/βHDmut-mNG	-4.449	-13.35 to 4.448	No	ns	0.6392	B-E
47.3684	23.0769	63.6364	66.6667	17.6471			siABHD16A+ABHD16A-mNG vs. siABHD16A+ABHD16AATmut-mNG	19.32	9.735 to 28.90	Yes	****	<0.0001	C-D
66.6667	34.6154	66.6667	38.4615	43.4783			siABHD16A+ABHD16A-mNG vs. siABHD16A+ABHD16Aα/βHDmut-mNG	47.25	37.58 to 56.91	Yes	****	<0.0001	C-E
62.5	28	86.6667	41.1765	25			siABHD16A+ABHD16AATmut-mNG vs. siABHD16A+ABHD16Aα/βHDmut-mNG	27.93	18.88 to 36.98	Yes	****	<0.0001	D-E
55.1724	20	83.3333	75	52.9412
69.5652	36.1111	93.75	55.5556	20
71.4286	20.9302	81.25	53.3333	33.3333
43.3333	15	76.4706	70.8333	23.8095
75	20.7	86.6667	61.9048	9.52381
66.6667	25	77.7778	48	40
62.5	23.1	46.6667	71.4286	15.3846
80	45.8	81.25	45	22.2222
52	21.1	53.3333	38.0952	31.8182
60	16.7	77.7778	37.5	14.2857
50	13.6	78.5714	64.7059	23.3333
79	7.7		50	45
63	26.3		81.25	17.6471
52	10		57.1429	20
73	47.4		75	26.6667
61	33.3		60.8696	15.7895
40	21.0526		35
64	18.1818
80	37.037
57

## Sheet: Fig 6F
siCTRL	siABHD16A	siABHD16A+ABHD16A-mNG	siABHD16A+ABHD16AATmut-mNG	siABHD16A+ABHD16Aα/βHDmut-mNG			Tukey's multiple comparisons test	Mean Diff.	95.00% CI of diff.	Below threshold?	Summary	Adjusted P Value
35.7143	20	38.4615	22.7273	7.14286			siCTRL vs. siABHD16A	28.72	20.77 to 36.67	Yes	****	<0.0001	A-B
31.5789	26.9231	50	15	20			siCTRL vs. siABHD16A+ABHD16A-mNG	-9.554	-18.76 to -0.3480	Yes	*	0.0378	A-C
33.3333	23.0769	52.9412	11.1111	6.25			siCTRL vs. siABHD16A+ABHD16AATmut-mNG	26.46	17.74 to 35.18	Yes	****	<0.0001	A-D
35.2941	17.8571	64.7059	35.7143	9.52381			siCTRL vs. siABHD16A+ABHD16Aα/βHDmut-mNG	29	20.38 to 37.62	Yes	****	<0.0001	A-E
38.4615	10	47.3684	5.55556	26.3158			siABHD16A vs. siABHD16A+ABHD16A-mNG	-38.27	-47.37 to -29.17	Yes	****	<0.0001	B-C
37.5	7.14286	53.3333	40.9091	23.0769			siABHD16A vs. siABHD16A+ABHD16AATmut-mNG	-2.257	-10.87 to 6.353	No	ns	0.9503	B-D
23.5294	5.26316	56.25	14.2857	27.2727			siABHD16A vs. siABHD16A+ABHD16Aα/βHDmut-mNG	0.2839	-8.225 to 8.793	No	ns	>0.9999	B-E
42.8571	17.2414	53.3333	12.5	33.3333			siABHD16A+ABHD16A-mNG vs. siABHD16A+ABHD16AATmut-mNG	36.02	26.24 to 45.79	Yes	****	<0.0001	C-D
33.3333	30	35.7143	13.7931	6.89655			siABHD16A+ABHD16A-mNG vs. siABHD16A+ABHD16Aα/βHDmut-mNG	38.56	28.87 to 48.25	Yes	****	<0.0001	C-E
37.5	22.2222	72.2222	6.25	15			siABHD16A+ABHD16AATmut-mNG vs. siABHD16A+ABHD16Aα/βHDmut-mNG	2.541	-6.688 to 11.77	No	ns	0.941	D-E
50	23.3333	62.5	14.2857	26.3158
41.6667	13.3333	50	26.3158	15.7895
38.4615	20.8333	40.9091	13.3333	9.09091
35.2941	6.25	60	22.7273	15
47.0588	11.1111	66.6667	46.6667	25
73.6842	20	76.9231	27.2727	15
52.9412	13.6364	90	8.33333	8.33333
75	15.7895	50	7.40741	14.2857
40	10	38.4615	8.33333	35
41.6667	40	75	26.3158	14.2857
41.1765	15.3846		22.7273	33.3333
73.6842	33.3333		23.0769	14.2857
61.9048	25		54.5455	23.8095
45	15.7895		18.1818	23.0769
58.3333	22.7273			7.14286
34.7826	28.5714
60	12.5
60	12
61.5385	16.6667
60	5.88235
46.1538	21.7391
62.5	29.4118
	19.0476
	15.7895

## Sheet: Fig 6G
siCTRL	siABHD16A	siABHD16A+ABHD16A-mNG	siABHD16A+ABHD16AATmut-mNG	siABHD16A+ABHD16Aα/βHDmut-mNG			Tukey's multiple comparisons test	Mean Diff.	95.00% CI of diff.	Below threshold?	Summary	Adjusted P Value
0.301645	0.096176	0.35471	0.081711	0.17702			siCTRL vs. siABHD16A	0.2073	0.1559 to 0.2586	Yes	****	<0.0001	A-B
0.344555	0.083455	0.306368	0.075101	0.085288			siCTRL vs. siABHD16A+ABHD16A-mNG	0.01491	-0.03503 to 0.06486	No	ns	0.9229	A-C
0.16655	0.067609	0.306958	0.196266	0.140262			siCTRL vs. siABHD16A+ABHD16AATmut-mNG	0.16	0.1086 to 0.2113	Yes	****	<0.0001	A-D
0.393408	0.150818	0.269078	0.17115	0.303784			siCTRL vs. siABHD16A+ABHD16Aα/βHDmut-mNG	0.1564	0.1028 to 0.2100	Yes	****	<0.0001	A-E
0.362312	0.048193	0.263219	0.228536	0.050474			siABHD16A vs. siABHD16A+ABHD16A-mNG	-0.1924	-0.2423 to -0.1424	Yes	****	<0.0001	B-C
0.386589	0.215813	0.248614	0.132649	0.178266			siABHD16A vs. siABHD16A+ABHD16AATmut-mNG	-0.04732	-0.09868 to 0.004033	No	ns	0.0865	B-D
0.270622	0.15755	0.178784	0.145322	0.130111			siABHD16A vs. siABHD16A+ABHD16Aα/βHDmut-mNG	-0.05086	-0.1045 to 0.002739	No	ns	0.0718	B-E
0.294569	0.070244	0.439945	0.091507	0.115295			siABHD16A+ABHD16A-mNG vs. siABHD16A+ABHD16AATmut-mNG	0.1451	0.09511 to 0.1950	Yes	****	<0.0001	C-D
0.318848	0.097083	0.303885	0.172195	0.198817			siABHD16A+ABHD16A-mNG vs. siABHD16A+ABHD16Aα/βHDmut-mNG	0.1415	0.08926 to 0.1938	Yes	****	<0.0001	C-E
0.433678	0.10192	0.337176	0.213739	0.170338			siABHD16A+ABHD16AATmut-mNG vs. siABHD16A+ABHD16Aα/βHDmut-mNG	-0.003538	-0.05714 to 0.05006	No	ns	0.9998	D-E
0.349678	0.040915	0.227282	0.084324	0.182366
0.407035	0.111152	0.462519	0.140224	0.169124
0.290305	0.104753	0.259441	0.140661	0.093547
0.348528	0.122645	0.322158	0.095868	0.145795
0.309816	0.155919	0.40767	0.178738	0.147605
0.494246	0.123911	0.241281	0.146698	0.159896
0.37876	0.092306	0.254566	0.138985	0.140681
0.372984	0.107468	0.290626	0.116372	0.09096
0.333468	0.095776	0.291867	0.139782	0.112077
0.242027	0.086102	0.203795	0.205869	0.167982
0.456044	0.103095	0.203037	0.099114	0.138933
0.302317	0.07696	0.437525	0.145586	0.258424
0.282378	0.112078	0.127931	0.171229	0.222055
0.304745	0.134009	0.364965	0.132668	0.088648
0.420026	0.08561	0.312509	0.135584	0.268357
0.256307	0.097106	0.202847	0.099073	0.115994
0.190153	0.129195	0.430163	0.325452	0.188142
0.218452	0.070021	0.127752	0.119003	0.282528
0.304727	0.086558	0.648387	0.190605
0.117564	0.2378	0.25113	0.393709
0.312336	0.209355	0.302803	0.152928
0.327113	0.0456	0.342254	0.168449
0.20083	0.134801	0.218137	0.184546
		0.427748
		0.25016
		0.266232
		0.329104
