# Supplementary material for: An ER phospholipid hydrolase drives ER-associated mitochondrial constriction for fission and fusion
Source: eLife. 2022 Nov 30;11:e84279. doi: 10.7554/eLife.84279 (PMC9725753; doi:10.7554/eLife.84279)
Supplement: Figure 7—source data 1. [file elife-84279-fig7-data1.xlsx]

## Sheet: Fig 7D
siCTRL	siORP8	siORP8+ORP8	siCTRL+ABHD16A-mCh OE	siORP8+ABHD16A-mCh OE	siORP8+ORP8+ABHD16A-mCh OE			Tukey's multiple comparisons test	Mean Diff.	95.00% CI of diff.	Below threshold?	Summary	Adjusted P Value
2.21043	6.10986	1.99027	0.961733	2.2634	0.579684			siCTRL vs. siORP8	0.02359	-0.5145 to 0.5617	No	ns	>0.9999	A-B
4.35633	3.3102	2.36933	0.799778	0.743038	0.350027			siCTRL vs. siORP8+ORP8	0.04909	-0.4569 to 0.5551	No	ns	0.9998	A-C
1.551	1.48117	1.84067	0.407609	3.2879	0.687087			siCTRL vs. siCTRL+ABHD16A-mCh OE	1.352	0.8284 to 1.875	Yes	****	<0.0001	A-D
2.40175	1.92469	2.80583	1.53258	2.36912	0.763167			siCTRL vs. siORP8+ABHD16A-mCh OE	0.1254	-0.3915 to 0.6424	No	ns	0.982	A-E
1.96622	2.732	2.22973	0.330792	2.7826	0.411533			siCTRL vs. siORP8+ORP8+ABHD16A-mCh OE	1.528	1.011 to 2.045	Yes	****	<0.0001	A-F
2.15171	3.36436	1.51012	2.2873	1.89236	0.457087			siORP8 vs. siORP8+ORP8	0.0255	-0.4657 to 0.5167	No	ns	>0.9999	B-C
1.76287	1.73857	1.7254	0.440263	2.4003	0.746976			siORP8 vs. siCTRL+ABHD16A-mCh OE	1.328	0.8191 to 1.837	Yes	****	<0.0001	B-D
1.4149	1.31691	2.76359	0.423107	3.64556	0.561824			siORP8 vs. siORP8+ABHD16A-mCh OE	0.1019	-0.4007 to 0.6044	No	ns	0.9921	B-E
1.67022	2.5178	1.65943	0.372875	2.54569	0.569344			siORP8 vs. siORP8+ORP8+ABHD16A-mCh OE	1.505	1.002 to 2.007	Yes	****	<0.0001	B-F
2.53646	1.24911	2.03469	0.364909	1.48323	0.5115			siORP8+ORP8 vs. siCTRL+ABHD16A-mCh OE	1.303	0.8276 to 1.778	Yes	****	<0.0001	C-D
1.21388	1.05773	1.72033	0.802222	1.08653	0.751273			siORP8+ORP8 vs. siORP8+ABHD16A-mCh OE	0.07635	-0.3916 to 0.5443	No	ns	0.9971	C-E
2.02537	1.98453	2.23614	0.37172	0.856895	0.499765			siORP8+ORP8 vs. siORP8+ORP8+ABHD16A-mCh OE	1.479	1.011 to 1.947	Yes	****	<0.0001	C-F
1.698	1.56994	2.67111	0.674222	1.74453	1.31425			siCTRL+ABHD16A-mCh OE vs. siORP8+ABHD16A-mCh OE	-1.226	-1.713 to -0.7396	Yes	****	<0.0001	D-E
2.41589	1.03436	1.81121	1.26725	0.64556	0.640091			siCTRL+ABHD16A-mCh OE vs. siORP8+ORP8+ABHD16A-mCh OE	0.1765	-0.3102 to 0.6631	No	ns	0.9027	D-F
1.56569	2.8178	2.23276	0.9083	0.910333	0.603333			siORP8+ABHD16A-mCh OE vs. siORP8+ORP8+ABHD16A-mCh OE	1.403	0.9229 to 1.883	Yes	****	<0.0001	E-F
2.6689	3.56783	2.33393	0.5503	2.08133	0.537107
1.16027	1.56567	1.41417	0.974471	2.83083	0.380462
3.36512	2.53164	3.757	0.640565	1.25221	0.371674
1.89813	1.39386	1.4235	0.3906	1.252	0.373773
2.274	2.0232	1.63864	0.72915	0.872684	0.553
1.66405	2.86489	1.55006	0.911222	1.77114	0.456833
1.67431	2.13143	1.87967	0.398611	5.2984	0.4482
3.3558	1.65036	2.95133	2.49812	2.78178	0.639345
1.80696	1.7108	1.48248	0.786	1.63733	0.35165
3.09575	1.78482	2.01473	1.032	1.63071	0.430882
0.999333	1.9454	2.45592	0.558167	1.29258	0.508976
1.9566	1.05647	2.18305	0.681208	0.576143	1.00482
2.68367	1.79713	1.94007	0.491217	2.2615	0.587174
	1.33877	1.9633	1.19582	3.17457	0.7025
	1.87492	1.44092	0.6645	1.50517	0.664083
	1.74569	1.79862	0.55908	1.67781	0.561714
		2.1691	0.669188	2.42529	0.569562
		1.049	0.525222	2.45043	0.895818
		1.69995	0.496075	1.55285	0.627533
		1.5728	0.424895	2.82411	0.387105
		1.69562		2.346	0.334778
		2.22914		1.88925	1.30784
		3.91
		2.3195
		1.58289
		3.12017

## Sheet: Fig 7E
siCTRL	siVPS13A/D	siCTRL+ABHD16A-mCh OE	siVPS13A/D+ABHD16A-mCh OE			Tukey's multiple comparisons test	Mean Diff.	95.00% CI of diff.	Below threshold?	Summary	Adjusted P Value
2.21043	1.88462	0.961733	0.547			siCTRL vs. siVPS13A/D	0.1478	-0.1930 to 0.4886	No	ns	0.6716	A-B
4.35633	1.77425	0.799778	1.11325			siCTRL vs. siCTRL+ABHD16A-mCh OE	1.352	1.023 to 1.681	Yes	****	<0.0001	A-C
1.551	2.68367	0.407609	0.494548			siCTRL vs. siVPS13A/D+ABHD16A-mCh OE	1.476	1.133 to 1.820	Yes	****	<0.0001	A-D
2.40175	2.02023	1.53258	0.678895			siVPS13A/D vs. siCTRL+ABHD16A-mCh OE	1.204	0.8812 to 1.527	Yes	****	<0.0001	B-C
1.96622	1.749	0.330792	0.3028			siVPS13A/D vs. siVPS13A/D+ABHD16A-mCh OE	1.329	0.9908 to 1.666	Yes	****	<0.0001	B-D
2.15171	1.97643	2.2873	0.341933			siCTRL+ABHD16A-mCh OE vs. siVPS13A/D+ABHD16A-mCh OE	0.1247	-0.2009 to 0.4504	No	ns	0.7507	C-D
1.76287	1.75509	0.440263	1.06447
1.4149	1.63005	0.423107	0.556185
1.67022	2.30167	0.372875	0.57315
2.53646	2.06641	0.364909	1.02256
1.21388	1.989	0.802222	0.659136
2.02537	2.30277	0.37172	0.416414
1.698	1.23694	0.674222	0.740045
2.41589	1.682	1.26725	0.528741
1.56569	2.4466	0.9083	0.553667
2.6689	2.07883	0.5503	0.476778
1.16027	1.2069	0.974471	0.648095
3.36512	1.35617	0.640565	0.528923
1.89813	1.7022	0.3906	0.796833
2.274	2.21015	0.72915	0.500238
1.66405	2.46236	0.911222	0.431644
1.67431	1.92388	0.398611	0.87825
3.3558	2.7333	2.49812	0.9611
1.80696	1.88633	0.786	0.584867
3.09575	2.24191	1.032	0.59288
0.999333	1.70807	0.558167	0.88625
1.9566	2.06186	0.681208	0.496
2.68367	1.6079	0.491217	0.849842
	2.302	1.19582	0.629825
	2.38143	0.6645
		0.55908
		0.669188
		0.525222
		0.496075
		0.424895
