# Supplementary material for: An ER phospholipid hydrolase drives ER-associated mitochondrial constriction for fission and fusion
Source: eLife journal article supplement (doi:10.7554/elife.84279), 2022-11-30

siCTRL  
siABHD16A  
siABHD16A+ABHD16A-Halo  
siABHD16A+ABHD16A<sup>ER</sup>-mNG  
siABHD16A+ABHD16A<sup>mito</sup>-mNG

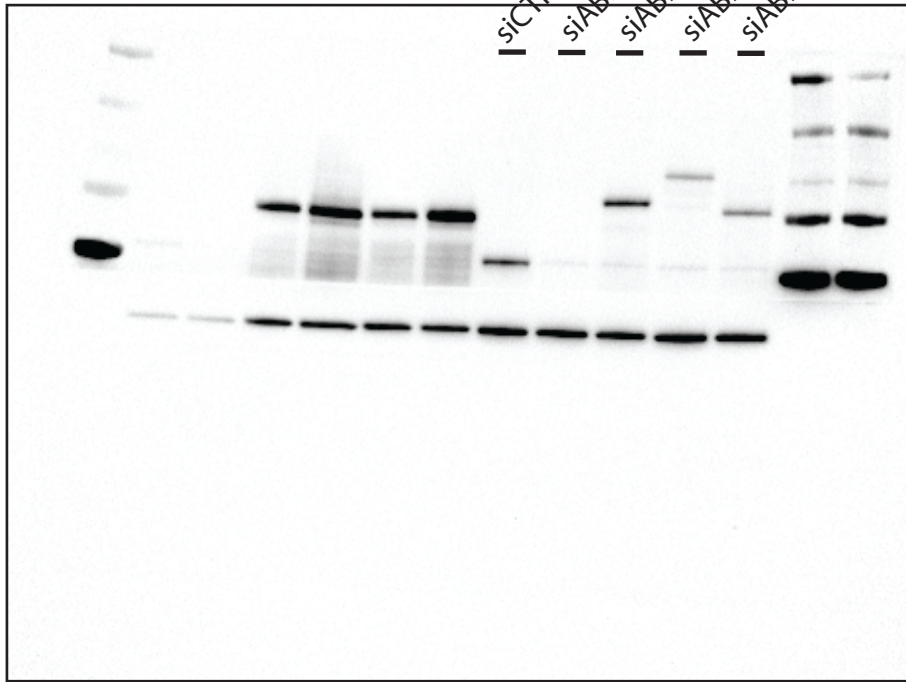

ABHD16A-mNG  
ABHD16A  
GAPDH

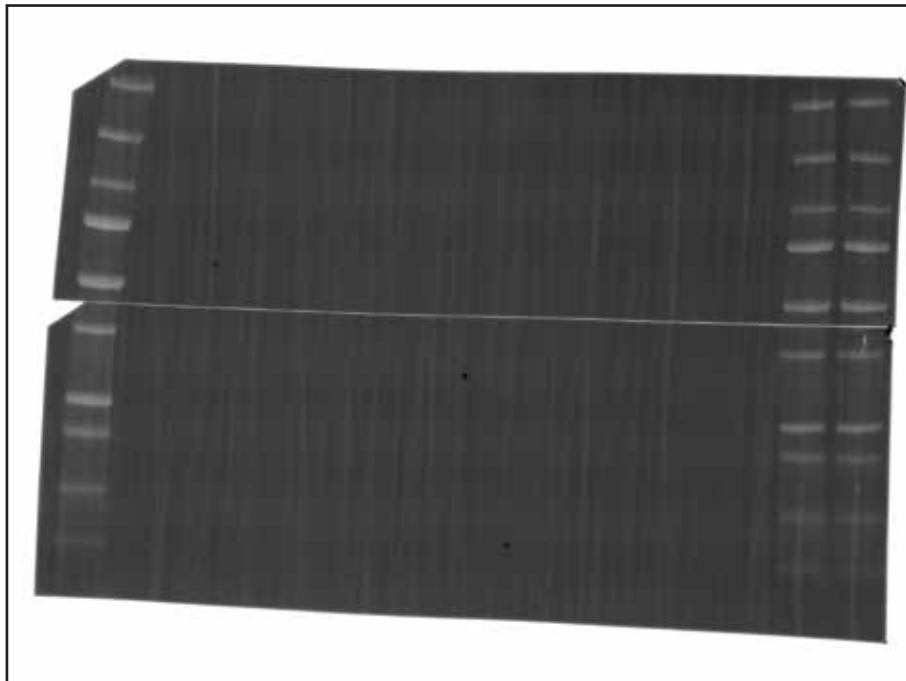

Supplement: supp [file elife-84279-supp-v1.zip]
