# Supplementary material for: An ER phospholipid hydrolase drives ER-associated mitochondrial constriction for fission and fusion
Source: eLife journal article supplement (doi:10.7554/elife.84279), 2022-11-30

siCTRL  
 siVPS13A/D  
 siCTRL+ABHD16A-mCh OE  
 siVPS13A/D+ABHD16A-mCh OE

siCTRL  
 siVPS13A/D  
 siCTRL+ABHD16A-mCh OE  
 siVPS13A/D+ABHD16A-mCh OE

siCTRL  
 siVPS13A/D  
 siCTRL+ABHD16A-mCh OE  
 siVPS13A/D+ABHD16A-mCh OE

anti-VPS13A      anti-VPS13D      anti-ABHD16A

GAPDH

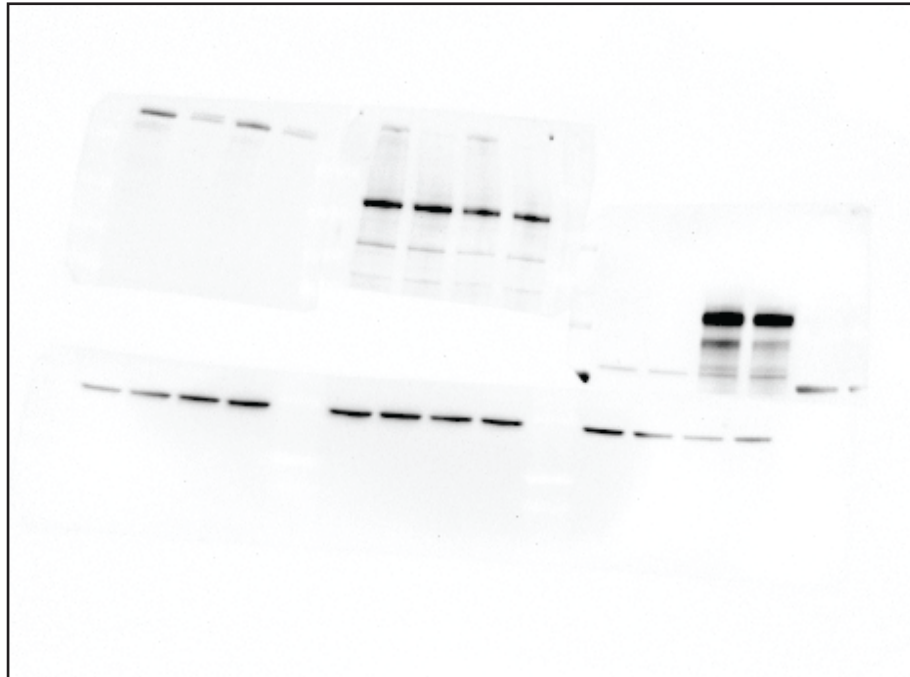

ABHD16A-mCh  
 ABHD16A  
 GAPDH

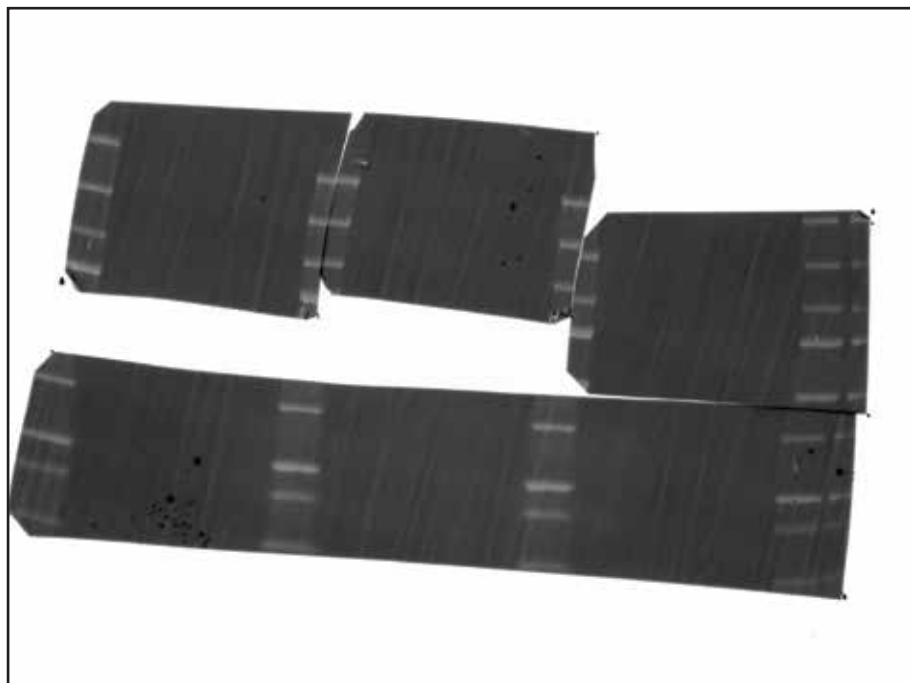

Supplement: supp [file elife-84279-supp-v1.zip]
