# Supplementary material for: An ER phospholipid hydrolase drives ER-associated mitochondrial constriction for fission and fusion
Source: eLife journal article supplement (doi:10.7554/elife.84279), 2022-11-30

mNG-ORP8  
ORP8

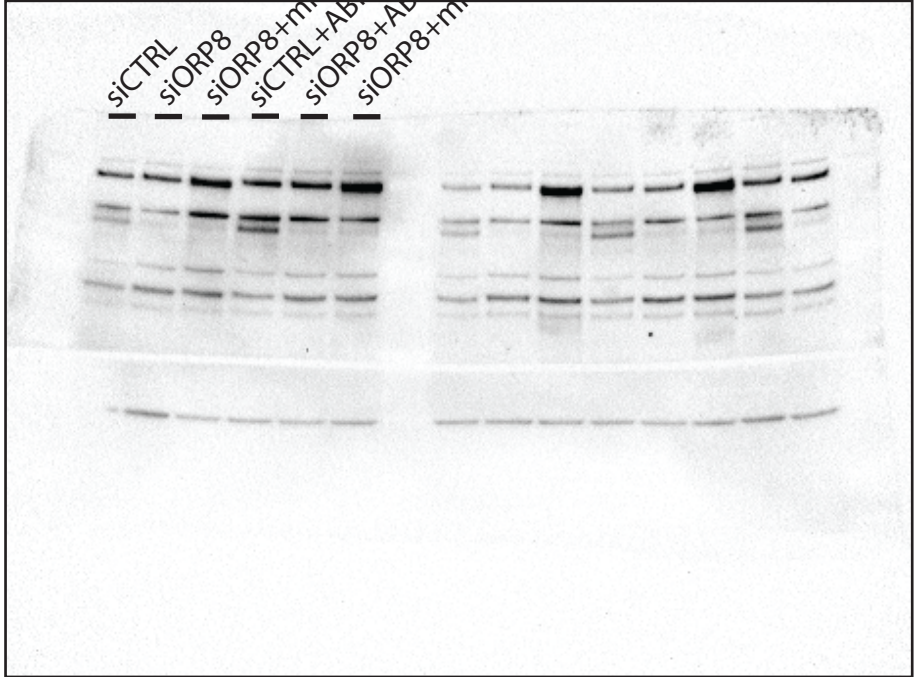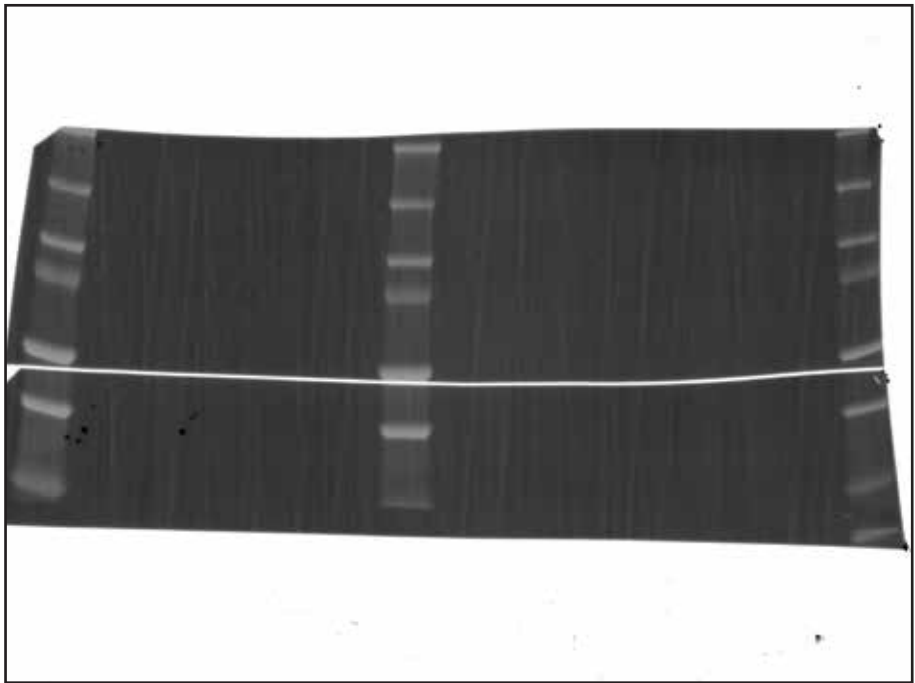

siCTRL  
siORP8  
siORP8+mNG-ORP8  
siCTRL+ABHD16A-mCh OE  
siORP8+ABHD16A-mCh OE  
siORP8+mNG-ORP8+ABHD16A-mCh OE

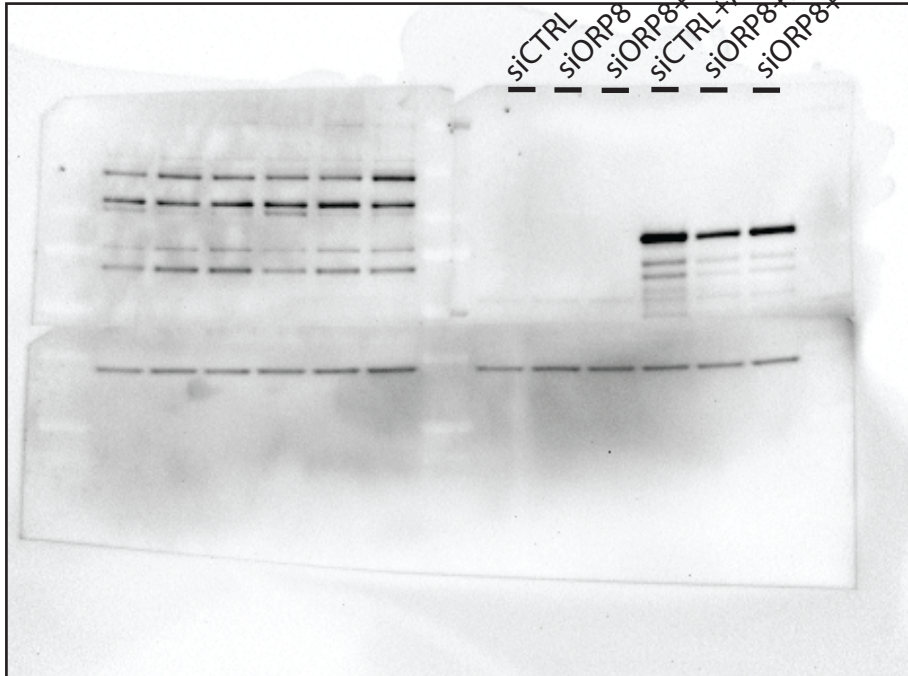

ABHD16A-mCherry  
ABHD16A  
GAPDH

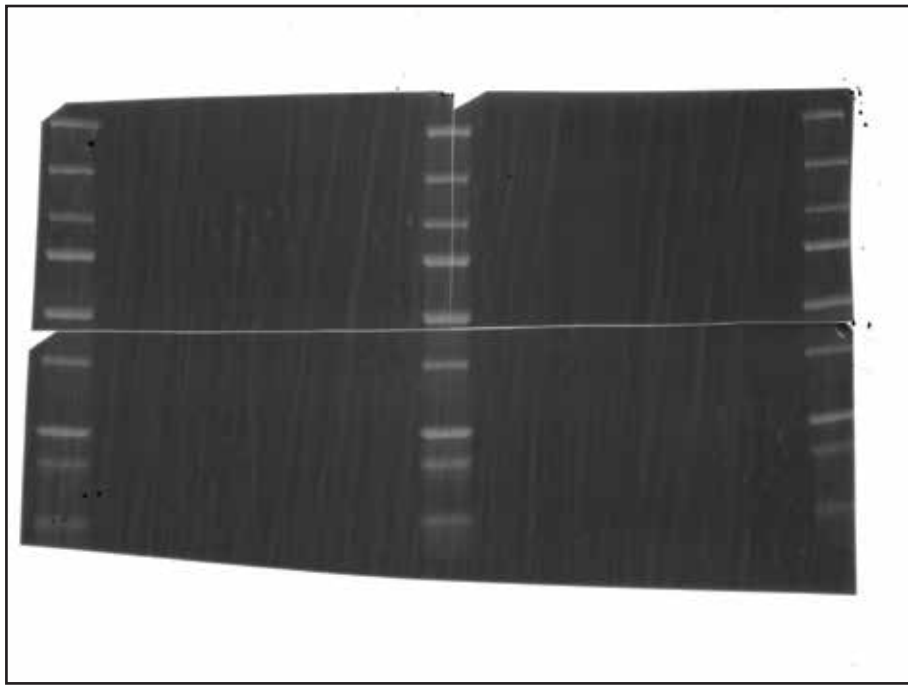

Supplement: supp [file elife-84279-supp-v1.zip]
