# Supplementary material for: An ER phospholipid hydrolase drives ER-associated mitochondrial constriction for fission and fusion
Source: eLife journal article supplement (doi:10.7554/elife.84279), 2022-11-30

WT Mfn1

Mfn1 E209A

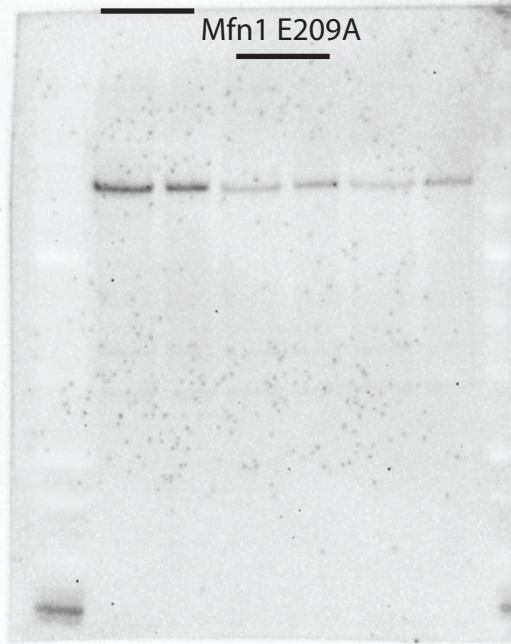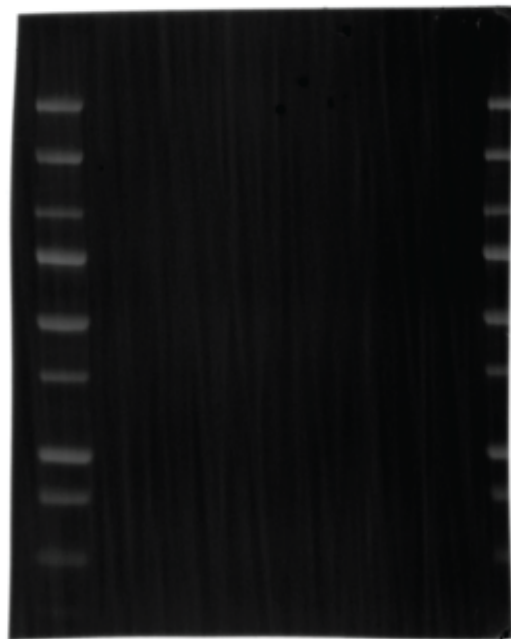

Supplement: supp [file elife-84279-supp-v1.zip]
