# Supplementary material for: An ER phospholipid hydrolase drives ER-associated mitochondrial constriction for fission and fusion
Source: eLife journal article supplement (doi:10.7554/elife.84279), 2022-11-30
Supplement: supp [file elife-84279-supp-v1.zip]

**A**

ABHD16A-mNG  
mCh-Sec61 $\beta$  (ER)  
mito-BFP (mito)

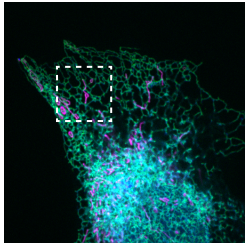

5μm

**B**

Equivalent protein loaded

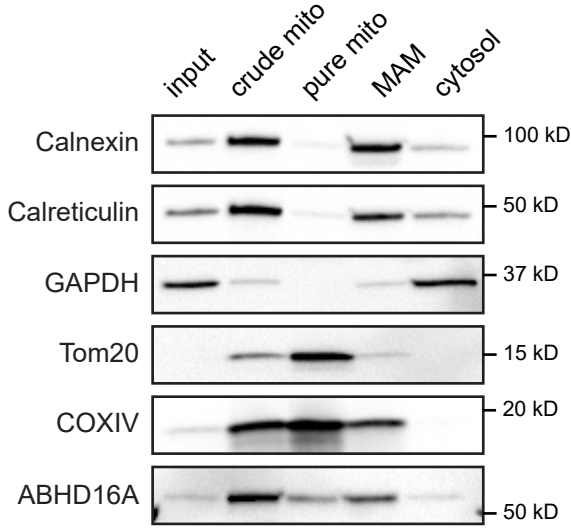

**C**

| Rank | Gene names     | Mfn1 WT average LFQ intensity | Mfn1 E209A average LFQ intensity |
|------|----------------|-------------------------------|----------------------------------|
| 1    | ZNF236         | 841200000                     | 0                                |
| 2    | CCDC191        | 198615000                     | 0                                |
| 3    | B2M            | 108529500                     | 0                                |
| 4    | EIF1AX;EIF1AY  | 71745000                      | 0                                |
| 5    | ARL6IP1        | 71298500                      | 0                                |
| 6    | TPI1           | 62838500                      | 0                                |
| 7    | PKHD1          | 62315000                      | 0                                |
| 8    | MMGT1          | 61065000                      | 0                                |
| 9    | FAM98B         | 57155000                      | 0                                |
| 10   | TMEM11         | 49045500                      | 0                                |
| 11   | CCT5           | 48803500                      | 0                                |
| 12   | PLGRKT         | 48439500                      | 0                                |
| 13   | O95714         | 47864000                      | 0                                |
| 14   | MYCBP2         | 45915000                      | 0                                |
| 15   | NEMF           | 44394000                      | 0                                |
| 16   | GOLPH3         | 43195000                      | 0                                |
| 17   | IPO7           | 43071500                      | 0                                |
| 18   | DNAJC19        | 38043500                      | 0                                |
| 19   | <b>ABHD16A</b> | <b>36971500</b>               | <b>0</b>                         |
| 20   | RDH14          | 36733500                      | 0                                |
| 21   | PNN            | 36082500                      | 0                                |
| 22   | KIF22          | 35806500                      | 0                                |
| 23   | TSPAN8         | 34765000                      | 0                                |
| 24   | MP68           | 33965000                      | 0                                |
| 25   | SPPL2A         | 32493000                      | 0                                |

| Rank | Gene names | Mfn1 WT average LFQ intensity | Mfn1 E209A average LFQ intensity |
|------|------------|-------------------------------|----------------------------------|
| 26   | TMEM97     | 32421500                      | 0                                |
| 27   | IDH3G      | 31053500                      | 0                                |
| 28   | RFTN1      | 30724500                      | 0                                |
| 29   | SPNS1      | 29447500                      | 0                                |
| 30   | ATP2B1     | 28666000                      | 0                                |
| 31   | NME3       | 28088500                      | 0                                |
| 32   | AKAP1      | 27089500                      | 0                                |
| 33   | PSMA4      | 26864500                      | 0                                |
| 34   | NDUFB7     | 26606000                      | 0                                |
| 35   | NDUFAF4    | 26083500                      | 0                                |
| 36   | NOL12      | 25892000                      | 0                                |
| 37   | CD70       | 25399500                      | 0                                |
| 38   | TMA7       | 24627000                      | 0                                |
| 39   | CSPG4      | 24396500                      | 0                                |
| 40   | CISD3      | 24179500                      | 0                                |
| 41   | ICMT       | 23906000                      | 0                                |
| 42   | RBM22      | 23546000                      | 0                                |
| 43   | CHD1       | 23317000                      | 0                                |
| 44   | TMEM161A   | 22871000                      | 0                                |
| 45   | VPS25      | 22531500                      | 0                                |
| 46   | RAC2       | 21960000                      | 0                                |
| 47   | SMARCB1    | 21258000                      | 0                                |
| 48   | CLCN7      | 21125500                      | 0                                |
| 49   | MCU        | 21001000                      | 0                                |
| 50   | YTHDF2     | 20459000                      | 0                                |
