# Supplementary material for: An ER phospholipid hydrolase drives ER-associated mitochondrial constriction for fission and fusion
Source: eLife journal article supplement (doi:10.7554/elife.84279), 2022-11-30
Supplement: supp [file elife-84279-supp-v1.zip]

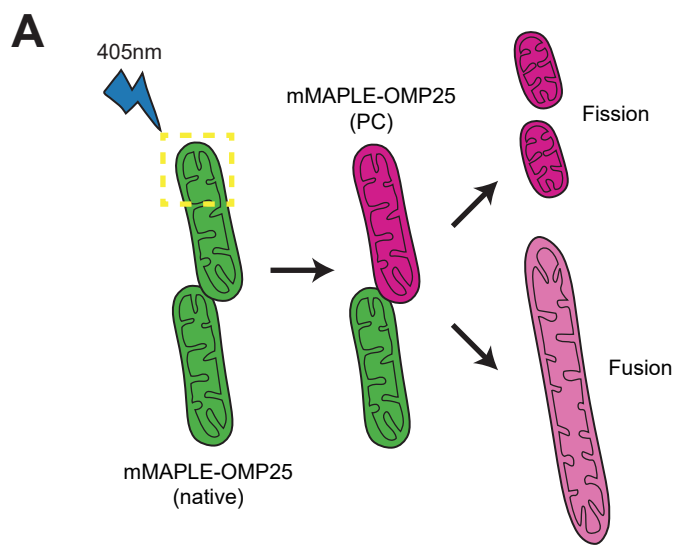

**B**

|                               | siCTRL | si16A | +16A |
|-------------------------------|--------|-------|------|
| # of mitochondria             | 68     | 69    | 85   |
| # of fusion events            | 85     | 21    | 83   |
| Fusion rate (fusion/mito/min) | 0.25   | 0.06  | 0.20 |

\*\*\*  
n.s.

**C**

|                                 | siCTRL | si16A | +16A |
|---------------------------------|--------|-------|------|
| # of mitochondria               | 68     | 69    | 85   |
| # of fission events             | 57     | 16    | 57   |
| Fission rate (fission/mito/min) | 0.17   | 0.05  | 0.13 |

\*\*\*  
n.s.
