# Supplementary figures and images for: An ER phospholipid hydrolase drives ER-associated mitochondrial constriction for fission and fusion
Source: eLife journal article supplement (doi:10.7554/elife.84279), 2022-11-30

**A**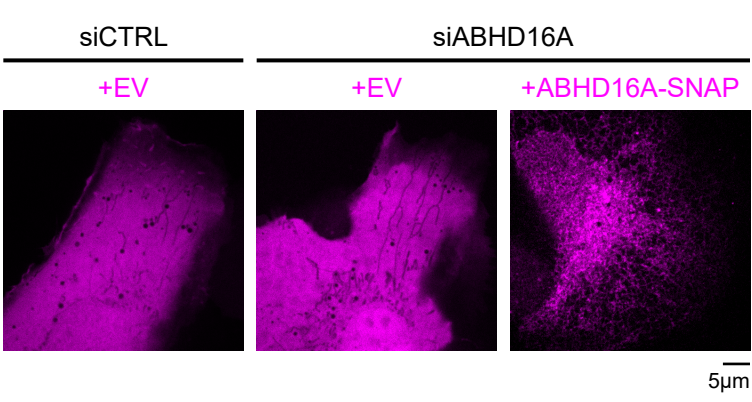**B**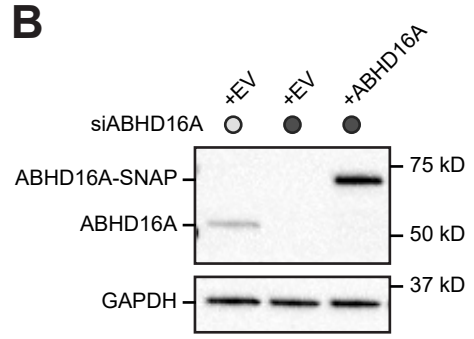**Figure S5**

Supplement: supp [file elife-84279-supp-v1.zip]

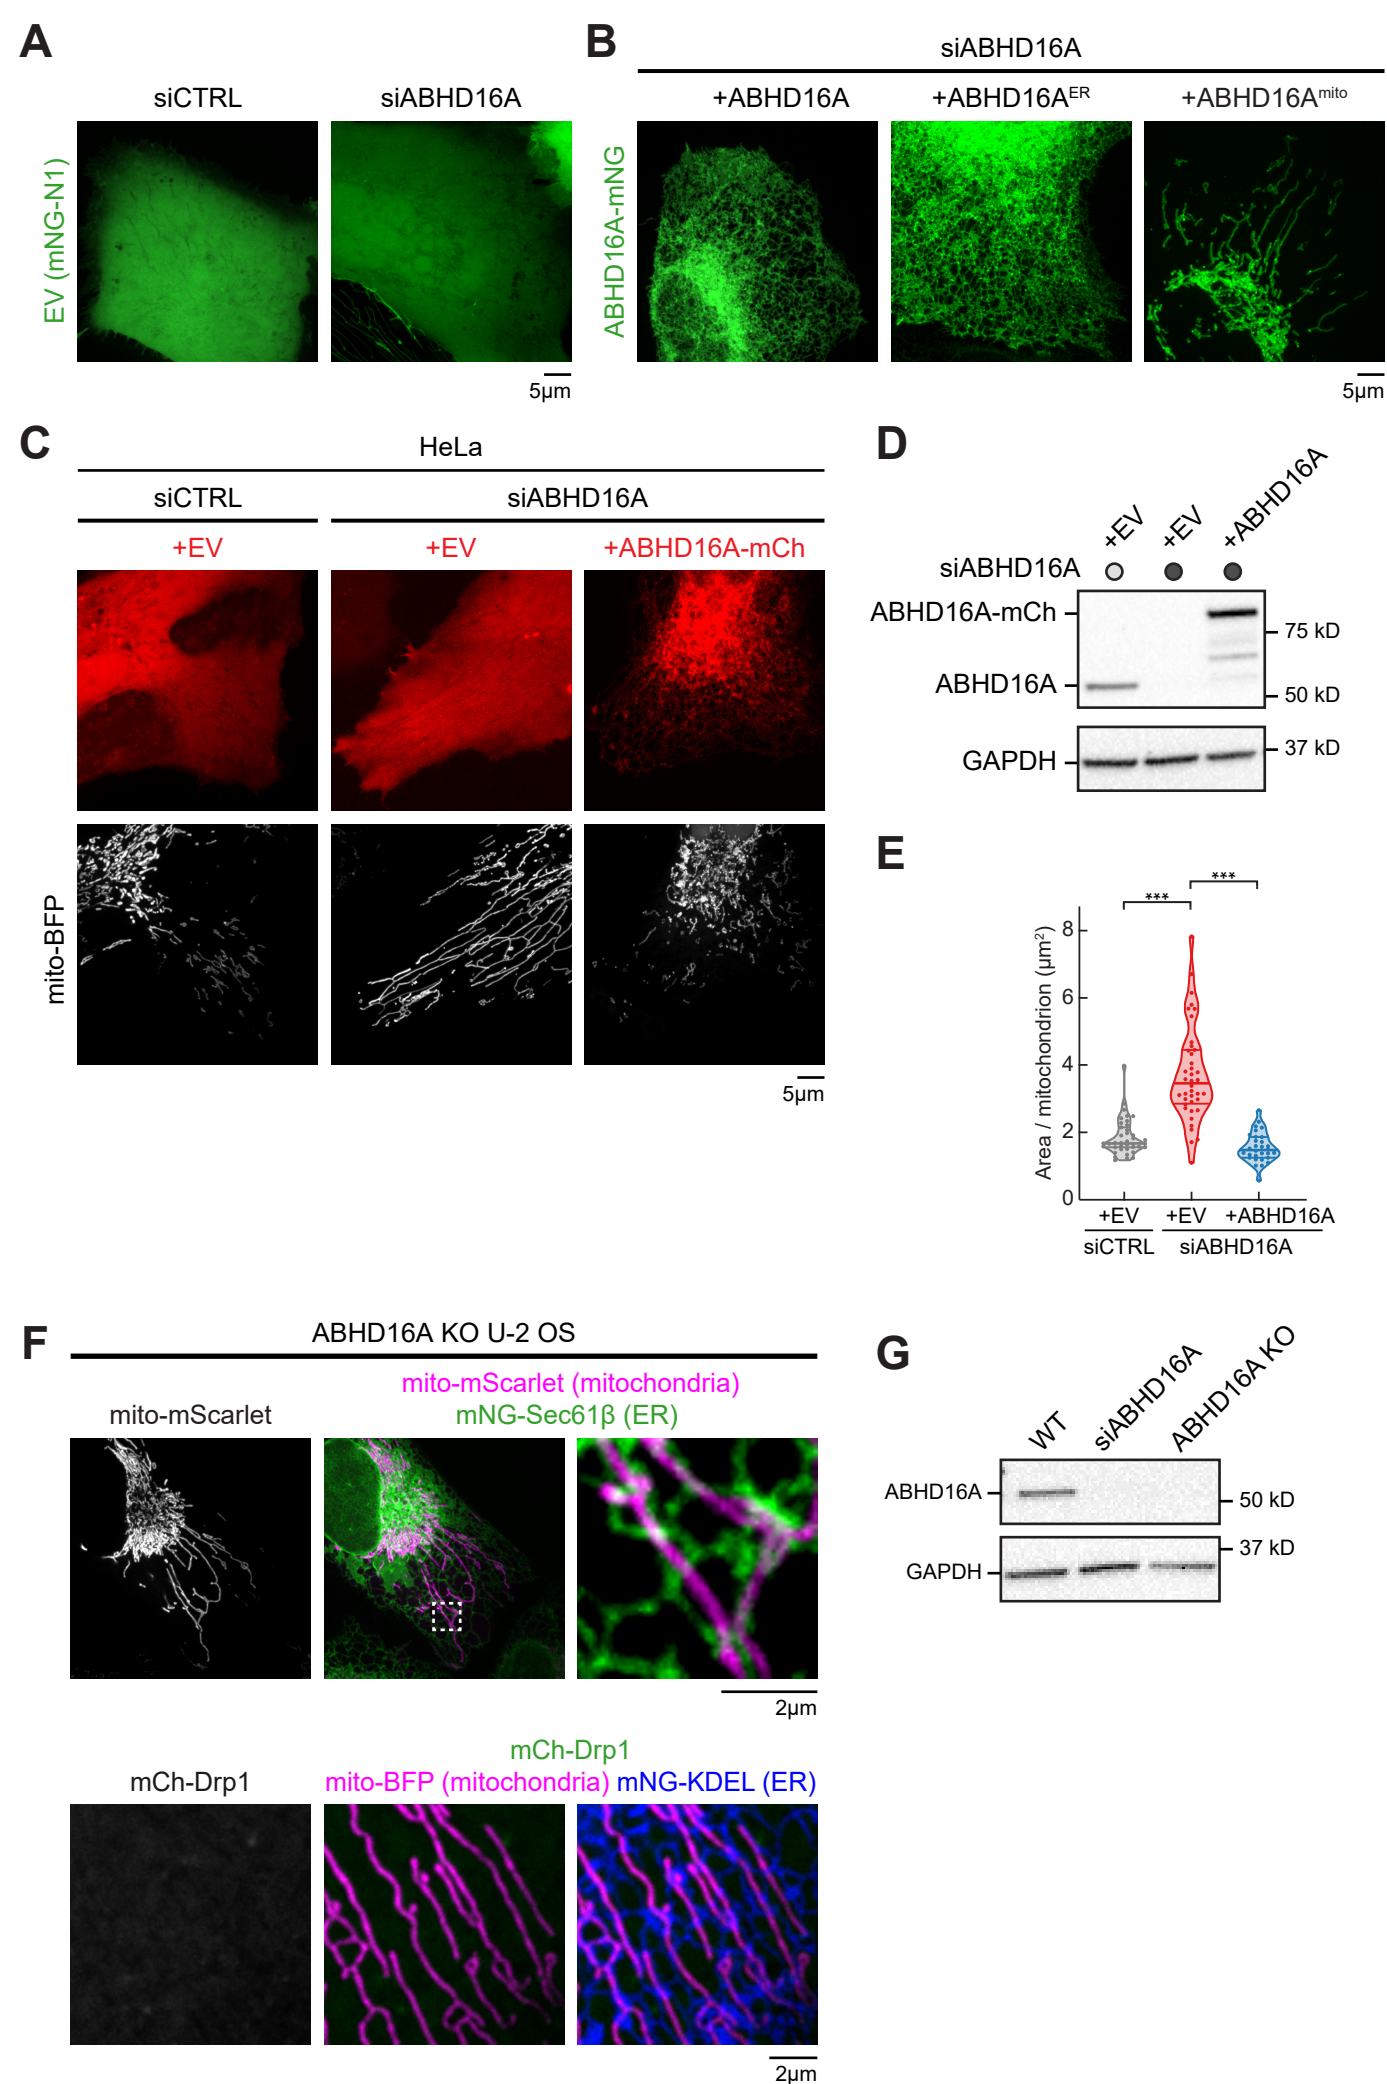

**Figure S4**

Supplement: supp [file elife-84279-supp-v1.zip]

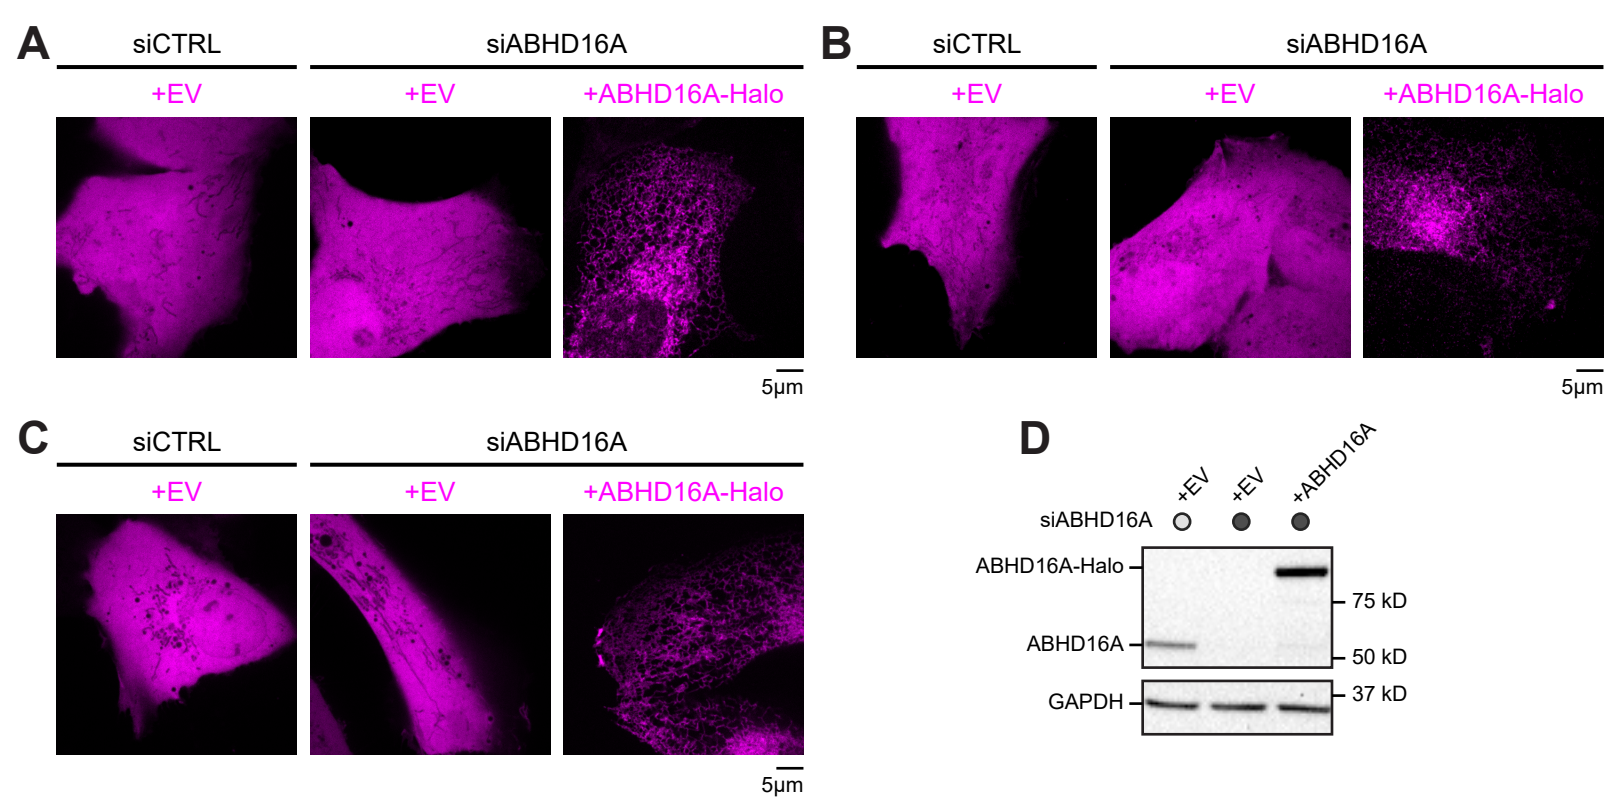

Figure S2

Supplement: supp [file elife-84279-supp-v1.zip]

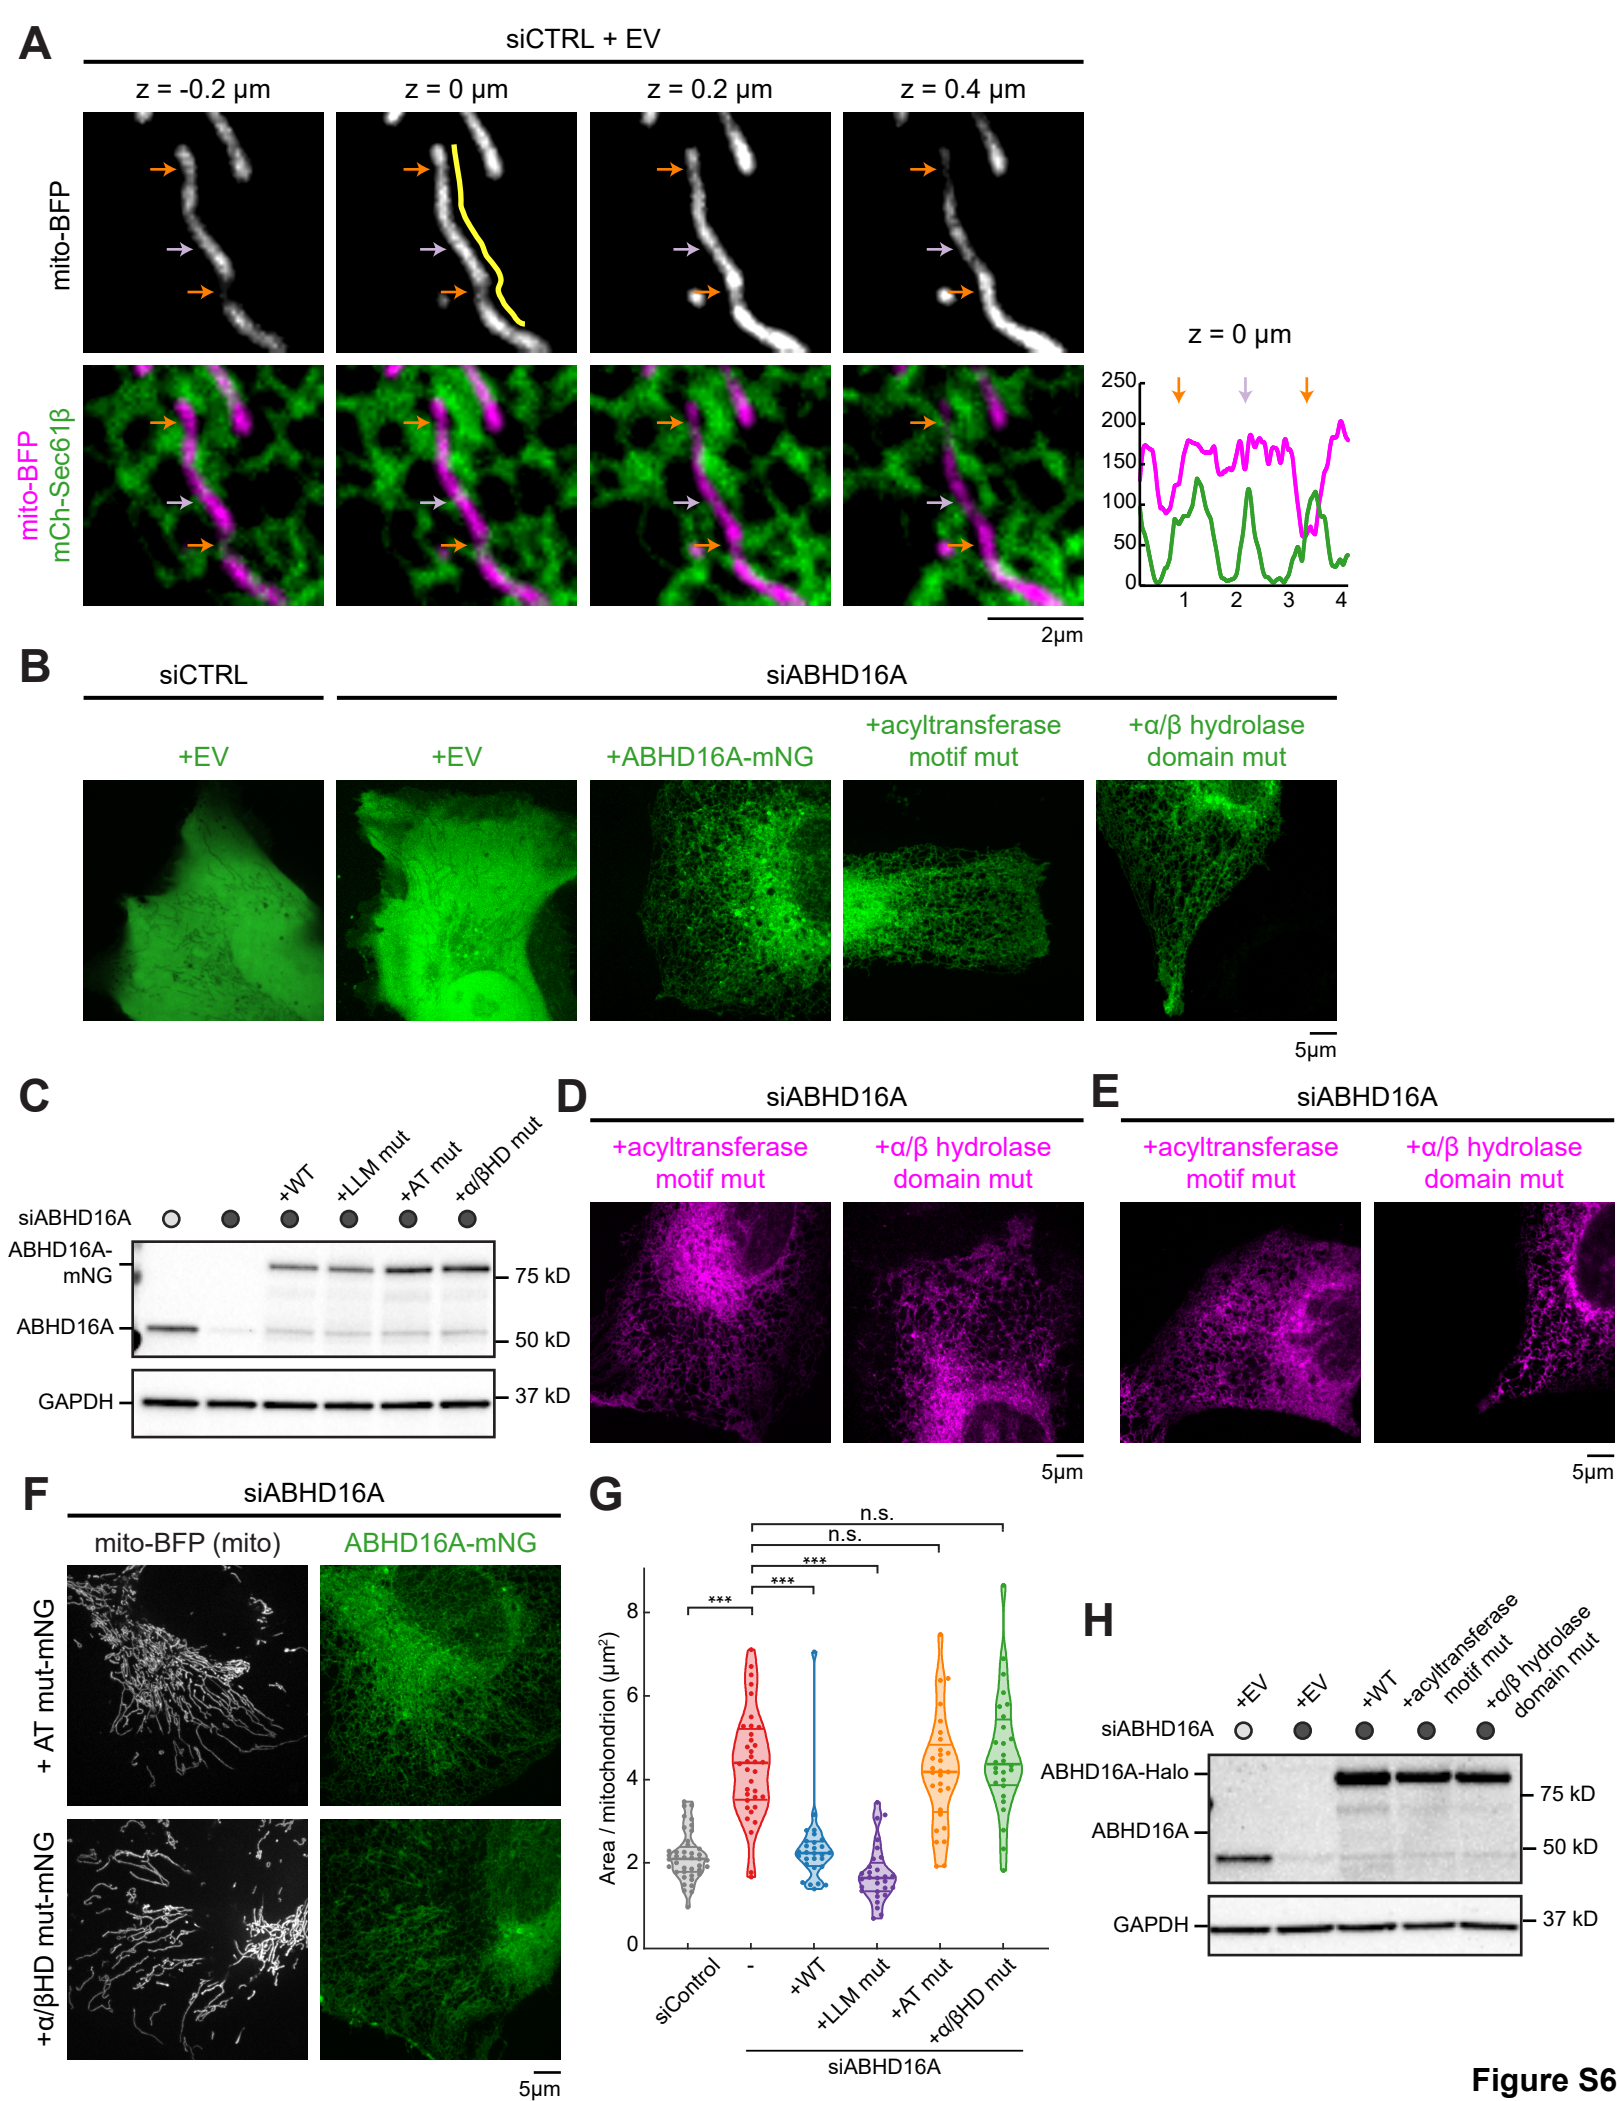

**Figure S6**

Supplement: supp [file elife-84279-supp-v1.zip]
